# Supplementary material for: Gene Expansion Shapes Genome Architecture in the Human Pathogen Lichtheimia corymbifera: An Evolutionary Genomics Analysis in the Ancient Terrestrial Mucorales (Mucoromycotina)
Source: PLoS Genet. 2014 Aug 14;10(8):e1004496. doi: 10.1371/journal.pgen.1004496 (PMC4133162; doi:10.1371/journal.pgen.1004496)
Supplement: Table S7 — RNA-Seq mapping and differentially expressed genes. (XLS) [file pgen.1004496.s014.xls]

## Sheet: HY_VERSUS_CO
id	log2FC	absfold	HYP_mean_rpkm	control_mean_rpkm	EdgeR	p_edgeR	Seq..Description	Seq..Length	X.Hits	min..eValue	mean.Similarity	X.GOs	GOs	Enzyme.Codes	InterProScan
LCOR_00001.1	0.157119	1.11506	147.012	131.843	FALSE	0.0284134	---NA---	164	0			0	0		IPR007919; SignalP-NN(euk) (SIGNALP), tmhmm (TMHMM)
LCOR_00002.1	0.132751	1.09638	10.4346	9.51735	FALSE	0.0574449	ring-14 protein	508	20	8.73304e-74	56.85%	2	F:protein binding; F:zinc ion binding	0	IPR001841; IPR004331; IPR013083; IPR017907; PTHR13982 (PANTHER), PTHR13982:SF5 (PANTHER), PF13923 (PFAM), SSF57850 (SUPERFAMILY)
LCOR_00003.1	-1.01722	0.494068	16.7065	33.8142	FALSE	0.169854	endothelin-converting enzyme	798	20	1.92942e-109	49.7%	2	F:metalloendopeptidase activity; P:proteolysis	EC:3.4.24.0	IPR000718; IPR008753; IPR018497; IPR024079; tmhmm (TMHMM), SSF55486 (SUPERFAMILY)
LCOR_00004.1	-0.797618	0.575298	60.1399	104.537	FALSE	0.616051	mitochondrial 2-oxodicarboxylate carrier protein	294	20	1.39464e-144	76.15%	1	P:transmembrane transport	0	IPR002067; IPR018108; IPR023395; PTHR24089 (PANTHER), PTHR24089:SF35 (PANTHER), tmhmm (TMHMM)
LCOR_00005.1	0.514753	1.42875	8.53254	5.97203	TRUE	0.00851776	rho guanyl-nucleotide exchange factor	859	10	5.28218e-57	46.4%	3	F:Rho guanyl-nucleotide exchange factor activity; C:intracellular; P:regulation of Rho protein signal transduction	0	IPR000219; IPR001180; PTHR12673 (PANTHER), PTHR12673:SF16 (PANTHER)
LCOR_00006.1	-1.3799	0.384246	26.0041	67.6758	FALSE	0.010622	---NA---	233	0			0	0		PTHR15069 (PANTHER)
LCOR_00008.1	-0.904567	0.534193	21.285	39.8451	FALSE	0.360416	glycoprotein endopeptidase kae1	340	20	0	83.2%	11	P:proteolysis; F:metalloendopeptidase activity; F:peptidase activity; C:chromosome, telomeric region; C:chromosome; P:tRNA processing; C:nucleus; C:cytoplasm; P:regulation of transcription, DNA-dependent; F:metal ion binding; P:transcription, DNA-dependent		IPR000905; IPR017860; IPR017861; G3DSA:3.30.420.40 (GENE3D), PTHR11735 (PANTHER), SSF53067 (SUPERFAMILY)
LCOR_00009.1	-1.04672	0.484067	35.3494	73.026	FALSE	0.156749	haloacid dehalogenase-like hydrolase domain-containing protein 3	371	20	7.37458e-43	56.95%	4	P:metabolic process; F:phosphoglycolate phosphatase activity; C:mitochondrion; F:NADH dehydrogenase (ubiquinone) activity	EC:3.1.3.18; EC:1.6.5.3	IPR005833; IPR006439; IPR008698; IPR011949; IPR023214; PTHR12725 (PANTHER), PTHR12725:SF5 (PANTHER)
LCOR_00011.1	-0.955725	0.515582	0.307767	0.596931	FALSE	0.686787	---NA---	1198	0			1	F:protein binding	0	IPR009060; IPR015940
LCOR_00012.1	-0.837882	0.559464	13.5047	24.1386	FALSE	0.571398	coiled-coil domain-containing protein 174	314	20	1.35753e-67	53.5%	3	F:molecular_function; P:biological_process; C:cellular_component		IPR025066; PTHR15885 (PANTHER), PTHR15885:SF0 (PANTHER)
LCOR_00013.1	-0.290017	0.817893	19.7444	24.1406	FALSE	0.460873	endosome-associated ubiquitin isopeptidase	462	20	1.62824e-91	70.65%	1	F:protein binding	0	IPR000555; IPR015063; G3DSA:3.40.140.10 (GENE3D), PTHR12947 (PANTHER), PTHR12947:SF4 (PANTHER), SSF102712 (SUPERFAMILY), SSF140856 (SUPERFAMILY)
LCOR_00014.1	-0.956887	0.515167	6.97931	13.5477	FALSE	0.541303	---NA---	80	0			0	0		no IPS match
LCOR_00015.1	-0.726019	0.60457	17.1426	28.3551	FALSE	0.736549	hypothetical protein RO3G_06060	296	2	2.33575e-39	64.0%	0	0		SignalP-NN(euk) (SIGNALP), tmhmm (TMHMM)
LCOR_00016.1	-0.630924	0.645763	25.2089	39.0375	FALSE	0.905963	---NA---	694	0			0	0		no IPS match
LCOR_00017.1	-1.45165	0.365603	7.30303	19.9753	FALSE	0.0246739	short-chain dehydrogenase reductase sdr	260	20	2.34407e-113	66.1%	2	P:metabolic process; F:oxidoreductase activity	0	IPR002198; IPR002347; IPR016040; IPR020904; PTHR24322 (PANTHER), PF13561 (PFAM), SSF51735 (SUPERFAMILY)
LCOR_00018.1	-0.546989	0.684447	26.634	38.9132	FALSE	1	hypothetical protein RO3G_02099	518	1	5.67546e-70	62.0%	3	F:actin binding; F:Rho GTPase binding; P:actin cytoskeleton organization	0	IPR010473; IPR016024
LCOR_00019.1	Inf	Inf	0.0658592	0	FALSE	1	---NA---	170	0			0	0		no IPS match
LCOR_00020.1	-1.4021	0.378378	13.2363	34.9816	TRUE	0.00701212	gpi transamidase component pig-s-like	526	20	1.16843e-84	52.25%	2	P:attachment of GPI anchor to protein; C:GPI-anchor transamidase complex	0	IPR019540; SignalP-NN(euk) (SIGNALP), tmhmm (TMHMM)
LCOR_00021.1	-0.735036	0.600803	16.9201	28.1625	FALSE	0.635555	related to ivy1-phospholipid-binding protein	381	20	5.47216e-44	59.35%	4	P:signal transduction; F:cytoskeletal adaptor activity; F:SH3 domain binding; P:filopodium assembly	0	IPR013606; G3DSA:1.20.1270.80 (GENE3D), SSF103657 (SUPERFAMILY)
LCOR_00022.1	-0.606141	0.656952	12.6145	19.2015	FALSE	0.995057	---NA---	237	0			0	0		IPR020987; PTHR14535 (PANTHER), PTHR14535:SF0 (PANTHER), SignalP-NN(euk) (SIGNALP)
LCOR_00023.1	0.918302	1.88989	6.44635	3.41097	FALSE	0.0125777	---NA---	122	0			0	0		tmhmm (TMHMM)
LCOR_00024.1	-0.511926	0.701286	90.5197	129.077	FALSE	0.937692	lysine decarboxylase	218	20	3.95102e-79	62.05%	0	0		IPR005269; G3DSA:3.40.50.450 (GENE3D), PTHR31223 (PANTHER), SSF102405 (SUPERFAMILY)
LCOR_00025.1	-1.52426	0.347657	2.07895	5.9799	FALSE	0.0901454	epoxide hydrolase	243	20	3.47635e-60	58.55%	2	P:metabolic process; F:phosphoglycolate phosphatase activity	EC:3.1.3.18	IPR005833; IPR006402; IPR006439; IPR023214; PTHR12725 (PANTHER), PTHR12725:SF8 (PANTHER)
LCOR_00026.1	-1.32099	0.400259	11.2085	28.0031	FALSE	0.0213003	glycosyltransferase family 32 protein	400	20	4.45587e-174	56.15%	1	F:transferase activity		IPR007577; PTHR12042 (PANTHER), PTHR12042:SF4 (PANTHER), SignalP-NN(euk) (SIGNALP), tmhmm (TMHMM)
LCOR_00027.1	-1.42695	0.371917	6.26918	16.8564	FALSE	0.0442535	---NA---	259	0			0	0		no IPS match
LCOR_00028.1	-1.2421	0.422757	11.8517	28.0343	FALSE	0.041374	atp-dependent protease la	1046	20	0	79.5%	5	F:ATP-dependent peptidase activity; P:proteolysis; F:ATP binding; F:serine-type endopeptidase activity; P:protein catabolic process	EC:3.4.21.0	IPR003111; IPR003593; IPR003959; IPR004815; IPR008268; IPR008269; IPR014721; IPR015947; IPR020568; IPR027065; IPR027417; PR00830 (PRINTS), G3DSA:1.10.8.60 (GENE3D), G3DSA:3.40.50.300 (GENE3D), PTHR10046:SF23 (PANTHER)
LCOR_00029.1	-1.11185	0.462699	7.49296	16.194	FALSE	0.200434	---NA---	272	0			0	0		no IPS match
LCOR_00031.1	-1.05882	0.480025	77.43	161.304	FALSE	0.134515	aldose 1-epimerase	281	20	1.68123e-107	60.8%	3	P:carbohydrate metabolic process; F:isomerase activity; F:carbohydrate binding	0	IPR008183; IPR011013; IPR014718; IPR025532; PTHR11122 (PANTHER), PTHR11122:SF9 (PANTHER)
LCOR_00032.1	Inf	Inf	0.0971755	0	FALSE	1	---NA---	115	0			0	0		SignalP-NN(euk) (SIGNALP)
LCOR_00033.1	-0.75312	0.593319	228.576	385.249	FALSE	0.64077	hypothetical protein RO3G_10481	87	2	1.33286e-40	86.0%	2	F:protein transporter activity; P:protein import into mitochondrial inner membrane	0	IPR004217; IPR027144; PTHR21535 (PANTHER)
LCOR_00034.1	2.5248	5.75495	1.40179	0.24358	FALSE	0.0349425	---NA---	76	0			0	0		no IPS match
LCOR_00035.1	1.33126	2.51623	4.41609	1.75505	TRUE	8.98353e-06	cytochrome p450	533	20	5.5628e-121	54.85%	3	F:electron carrier activity; F:heme binding; P:oxidation-reduction process	0	IPR001128; IPR002401; IPR017972; PTHR24305 (PANTHER)
LCOR_00037.1	1.84567	3.59421	1.1851	0.329725	TRUE	0.00042594	cytochrome p450	539	20	3.73775e-131	54.85%	3	F:electron carrier activity; F:heme binding; P:oxidation-reduction process	0	IPR001128; IPR002401; IPR017972; PTHR24305 (PANTHER)
LCOR_00038.1	-0.947878	0.518394	8.52552	16.446	FALSE	0.309316	hypothetical protein RO3G_16043	539	2	1.27723e-104	70.5%	1	F:protein binding	0	IPR001715
LCOR_00039.1	0.440057	1.35666	108.949	80.3066	TRUE	0.0031666	termination and polyadenylation protein	560	20	0	57.45%	4	F:oxidoreductase activity; P:oxidation-reduction process; F:iron ion binding; F:L-ascorbic acid binding	0	IPR005123; IPR006620; IPR019601; PTHR12117 (PANTHER)
LCOR_00040.1	1.12378	2.17917	0.240349	0.110294	FALSE	0.406531	mannose-1-phosphate guanyltransferase beta-like	261	20	6.19565e-75	61.65%	2	P:biosynthetic process; F:nucleotidyltransferase activity	EC:2.7.7.0	IPR005835; G3DSA:3.90.550.10 (GENE3D), PTHR22572 (PANTHER), PTHR22572:SF19 (PANTHER), SSF53448 (SUPERFAMILY)
LCOR_00041.1	0.110356	1.07949	24.9759	23.1367	FALSE	0.102906	protein of carbonic anhydrase family	180	20	3.93836e-75	69.95%	3	F:zinc ion binding; F:carbonate dehydratase activity; P:carbon utilization		IPR019560; PTHR11001 (PANTHER), PTHR11001:SF0 (PANTHER)
LCOR_00042.1	1.05223	2.07373	817.255	394.099	TRUE	1.98112e-06	trehalose synthase	685	20	0	60.85%	1	P:biosynthetic process	0	IPR001296; G3DSA:3.40.50.2000 (GENE3D), PTHR12526 (PANTHER), PTHR12526:SF12 (PANTHER), SSF53756 (SUPERFAMILY)
LCOR_00043.1	0.83249	1.78076	61.9187	34.771	TRUE	8.21659e-06	hypothetical protein RO3G_13931	157	1	1.85242e-48	71.0%	0	0		IPR003736; IPR006683; G3DSA:3.10.129.10 (GENE3D), PTHR21660 (PANTHER), tmhmm (TMHMM), SSF54637 (SUPERFAMILY)
LCOR_00044.1	-1.33579	0.396175	25.2054	63.6218	FALSE	0.0514402	glycosyltransferase family 15 protein	460	20	0	67.95%	3	F:mannosyltransferase activity; P:protein glycosylation; C:membrane	0	IPR002685; G3DSA:3.90.550.10 (GENE3D), PTHR31121 (PANTHER), SignalP-NN(euk) (SIGNALP), tmhmm (TMHMM), SSF53448 (SUPERFAMILY)
LCOR_00045.1	-0.793404	0.576981	13.5953	23.5628	FALSE	0.560064	leucine carboxyl methyltransferase 2-like	378	20	3.68805e-83	59.8%	2	F:methyltransferase activity; P:methylation	EC:2.1.1.0	IPR007213; IPR016651; IPR021121; G3DSA:3.40.50.150 (GENE3D), PTHR13600:SF0 (PANTHER), SSF53335 (SUPERFAMILY)
LCOR_00046.1	Inf	Inf	0.0157693	0	FALSE	1	succinate dehydrogenase	568	20	0	86.7%	4	P:tricarboxylic acid cycle; F:flavin adenine dinucleotide binding; P:electron transport chain; F:oxidoreductase activity	0	IPR003953; IPR011281; IPR014006; IPR015939; IPR027477; G3DSA:3.50.50.60 (GENE3D), PTHR11632 (PANTHER), SSF51905 (SUPERFAMILY)
LCOR_00047.1	-0.676429	0.625712	29.7103	47.4825	FALSE	0.873488	---NA---	110	0			0	0		IPR021475
LCOR_00048.1	-0.991157	0.503074	0.27614	0.548906	FALSE	0.87009	hypothetical protein RO3G_06280	292	1	2.19065e-27	84.0%	2	F:zinc ion binding; F:nucleic acid binding	0	IPR007087; IPR013087; IPR015880; PTHR24377 (PANTHER), PTHR24377:SF0 (PANTHER), PF13894 (PFAM), SSF57667 (SUPERFAMILY)
LCOR_00049.1	-0.731347	0.602341	3.71765	6.172	FALSE	0.698654	ddenn domain protein	996	20	0	49.5%	4	P:intracellular signal transduction; C:cytoplasm; C:cytosol; C:nucleus		IPR001194; IPR005112; IPR005113; PTHR12296 (PANTHER)
LCOR_00050.1	-0.599846	0.659825	5.3143	8.0541	FALSE	0.967509	allantoicase	399	20	7.90606e-49	51.45%	2	P:allantoin catabolic process; F:allantoicase activity	EC:3.5.3.4	IPR005164; IPR008979; IPR015908
LCOR_00051.1	-0.823404	0.565107	8.52419	15.0842	FALSE	0.571002	phospholipid-translocating p-type atpase domain-containing protein	1530	20	0	62.5%	7	P:cation transport; C:integral to membrane; F:cation-transporting ATPase activity; F:magnesium ion binding; F:phospholipid-translocating ATPase activity; F:ATP binding; P:phospholipid transport	EC:3.6.3.1	IPR001757; IPR006539; IPR008250; IPR018303; IPR023214; IPR023299; IPR026871; PF12710 (PFAM), tmhmm (TMHMM), SSF81653 (SUPERFAMILY), SSF81665 (SUPERFAMILY)
LCOR_00052.1	-1.17694	0.442287	0.215829	0.487983	FALSE	0.581047	cytochrome p450	510	20	0	61.0%	3	F:electron carrier activity; F:heme binding; P:oxidation-reduction process	0	IPR001128; IPR002401; IPR017972; PTHR24296 (PANTHER), PTHR24296:SF0 (PANTHER), tmhmm (TMHMM)
LCOR_00053.1	-0.49979	0.70721	7.93597	11.2215	FALSE	1	hypothetical protein RO3G_07526	714	4	5.55118e-62	61.0%	0	0		IPR007604; PTHR11037 (PANTHER)
LCOR_00054.1	-1.98664	0.252326	2.85958	11.3329	TRUE	8.37264e-05	aconitate hydratase	789	20	0	77.4%	2	F:aconitate hydratase activity; P:tricarboxylic acid cycle	EC:4.2.1.3	IPR000573; IPR001030; IPR006248; IPR015928; IPR015931; IPR015932; IPR015937; IPR018136
LCOR_00055.1	-0.900341	0.53576	6.27436	11.7111	FALSE	0.338058	pkinase-domain-containing protein	724	20	2.85191e-143	74.9%	4	F:ATP binding; P:protein phosphorylation; F:protein serine/threonine kinase activity; F:protein tyrosine kinase activity	EC:2.7.11.0; EC:2.7.10.0	IPR000719; IPR002290; IPR008271; IPR011009; IPR017441; IPR020635; G3DSA:1.10.510.10 (GENE3D), G3DSA:3.30.200.20 (GENE3D), PTHR24056 (PANTHER), PTHR24056:SF39 (PANTHER)
LCOR_00056.1	-1.13424	0.455574	7.08256	15.5465	FALSE	0.147071	gpi-anchored wall transfer protein 1	466	20	8.73605e-80	59.9%	3	C:endoplasmic reticulum membrane; P:GPI anchor biosynthetic process; C:integral to membrane	0	IPR009447; tmhmm (TMHMM)
LCOR_00057.1	-1.98981	0.251773	17.5197	69.5852	TRUE	3.90213e-06	hypothetical protein RO3G_03210	463	8	1.52483e-47	65.63%	2	F:catalytic activity; P:metabolic process	0	IPR001736; IPR025202; G3DSA:3.30.870.10 (GENE3D), PTHR21248 (PANTHER), PTHR21248:SF0 (PANTHER), SSF56024 (SUPERFAMILY)
LCOR_00058.1	-1.70582	0.306547	490.99	1601.68	TRUE	0.000418477	hypothetical protein RO3G_13194	147	2	1.04742e-37	69.5%	0	0		IPR000772; G3DSA:2.80.10.50 (GENE3D), PTHR11818 (PANTHER)
LCOR_00059.1	-0.0930026	0.937569	470.043	501.342	FALSE	0.176992	fad binding domain containing protein	416	20	9.6345e-61	48.05%	2	P:metabolic process; F:oxidoreductase activity	0	IPR002938; IPR003042; G3DSA:3.50.50.60 (GENE3D), PTHR13789 (PANTHER), PTHR13789:SF91 (PANTHER), SSF51905 (SUPERFAMILY)
LCOR_00060.1	-0.99062	0.503261	5.69523	11.3167	FALSE	0.22181	arf gtpase activator	854	20	1.44659e-151	49.2%	5	F:ARF GTPase activator activity; F:zinc ion binding; P:regulation of ARF GTPase activity; F:protein binding; F:phospholipid binding	0	IPR001164; IPR001849; IPR011993; IPR027267; PTHR23180 (PANTHER), SSF103657 (SUPERFAMILY), SSF50729 (SUPERFAMILY), SSF57863 (SUPERFAMILY)
LCOR_00063.1	0.29606	1.22779	65.6191	53.4451	TRUE	0.0081268	related to zap1-metalloregulatory protein involved in zinc-responsive transcriptional regulation	336	20	1.69414e-84	71.5%	2	F:zinc ion binding; F:nucleic acid binding	0	IPR007087; IPR013087; IPR015880; PTHR11389 (PANTHER), PF12756 (PFAM), PF13465 (PFAM), SSF57667 (SUPERFAMILY)
LCOR_00064.1	-0.512225	0.70114	20.3378	29.0067	FALSE	0.948817	dna repair and recombination protein rad54	793	20	0	74.6%	3	F:DNA binding; F:ATP binding; F:helicase activity	0	IPR000330; IPR001650; IPR013967; IPR014001; IPR027417; G3DSA:3.40.50.300 (GENE3D), PTHR10799 (PANTHER), PTHR10799:SF302 (PANTHER)
LCOR_00065.1	-Inf	0	0	0.281238	FALSE	0.698654	---NA---	71	0			0	0		SignalP-NN(euk) (SIGNALP)
LCOR_00066.1	-0.415191	0.74992	8.19359	10.926	FALSE	0.837807	---NA---	146	0			0	0		no IPS match
LCOR_00067.1	-0.737929	0.5996	0.279833	0.4667	FALSE	1	---NA---	80	0			0	0		SignalP-NN(euk) (SIGNALP)
LCOR_00068.1	-0.624399	0.64869	42.9003	66.1338	FALSE	0.903846	leucine rich repeat domain-containing protein	620	10	8.82717e-80	61.5%	1	F:protein binding	0	IPR001611; IPR025875; G3DSA:3.80.10.10 (GENE3D), PTHR15454 (PANTHER), PTHR15454:SF7 (PANTHER), SM00365 (SMART), SSF52058 (SUPERFAMILY)
LCOR_00069.1	0.141967	1.10341	16.9879	15.3959	FALSE	0.0293215	ndt80 like dna-binding family protein	557	20	6.51917e-118	58.15%	2	F:sequence-specific DNA binding transcription factor activity; F:DNA binding	0	IPR008967; IPR024061
LCOR_00070.1	-0.930865	0.524544	4.92884	9.39643	FALSE	0.442327	---NA---	278	0			0	0		IPR016181
LCOR_00071.1	0.289477	1.2222	204.732	167.511	FALSE	0.0160787	---NA---	400	0			0	0		tmhmm (TMHMM)
LCOR_00072.1	-0.374947	0.771134	63.9002	82.8652	FALSE	0.624227	peroxin 13	399	20	3.2717e-67	61.35%	3	F:protein binding; C:peroxisome; C:integral to membrane	0	IPR001452; IPR007223; G3DSA:2.30.30.40 (GENE3D), PTHR19332 (PANTHER), PTHR19332:SF0 (PANTHER), tmhmm (TMHMM)
LCOR_00073.1	-0.618308	0.651434	745.487	1144.38	FALSE	0.988328	40s ribosomal protein s8	206	20	5.96743e-94	79.6%	3	F:structural constituent of ribosome; C:ribosome; P:translation	0	IPR001047; IPR022309; PTHR10394:SF1 (PANTHER)
LCOR_00074.1	-0.988051	0.504158	47.7103	94.6336	FALSE	0.243504	n-alpha-acetyltransferase auxiliary subunit	94	20	3.03046e-29	74.3%	11	P:mRNA processing; F:U6 snRNA binding; C:ribonucleoprotein complex; C:nucleus; P:RNA splicing; F:molecular_function; F:RNA binding; C:cellular_component; P:nuclear mRNA splicing, via spliceosome; F:protein binding; P:biological_process		IPR001163; IPR006649; IPR010920; G3DSA:2.30.30.100 (GENE3D), PTHR15588 (PANTHER), SignalP-NN(euk) (SIGNALP)
LCOR_00075.1	0.0971016	1.06962	4.22606	3.95098	FALSE	0.359556	---NA---	111	0			0	0		no IPS match
LCOR_00076.1	-0.17872	0.883487	10.2632	11.6167	FALSE	0.476253	myosin regulatory light chain smooth muscle isoform	144	20	2.58938e-52	70.6%	1	F:calcium ion binding	0	IPR002048; IPR011992; IPR018247; PTHR23049 (PANTHER), PF13833 (PFAM), SSF47473 (SUPERFAMILY)
LCOR_00077.1	-0.402402	0.756598	15.0641	19.9103	FALSE	0.784124	hypothetical protein RO3G_14167	298	1	6.21716e-55	73.0%	0	0		IPR006880; PTHR21561 (PANTHER)
LCOR_00079.1	0.767	1.70173	38.2471	22.4755	TRUE	3.24418e-05	udp-glycosyltransferase glycogen phosphorylase	1236	20	2.96342e-168	62.05%	3	F:protein binding; F:phospholipid binding; P:lipid glycosylation	0	IPR001849; IPR002213; IPR004182; IPR004276; IPR011993; G3DSA:3.40.50.2000 (GENE3D), PTHR11926:SF78 (PANTHER), SSF50729 (SUPERFAMILY), SSF53756 (SUPERFAMILY)
LCOR_00080.1	-0.727618	0.6039	41.2742	68.3461	FALSE	0.743973	mitochondrial carrier	316	20	1.45382e-171	76.4%	3	C:integral to membrane; C:membrane; P:transport		IPR018108; IPR023395; PTHR24089 (PANTHER), PTHR24089:SF70 (PANTHER)
LCOR_00081.1	-0.684019	0.622429	520.63	836.449	FALSE	0.802281	elongation factor 1-alpha	458	20	0	95.85%	5	F:GTPase activity; F:GTP binding; F:translation elongation factor activity; C:cytoplasm; P:translational elongation	0	IPR000795; IPR004160; IPR004161; IPR004539; IPR009000; IPR009001; IPR027417; G3DSA:2.40.30.10 (GENE3D), G3DSA:3.40.50.300 (GENE3D), PTHR23115 (PANTHER), PTHR23115:SF37 (PANTHER)
LCOR_00083.1	-Inf	0	0	0.12493	FALSE	1	---NA---	80	0			0	0		SignalP-NN(euk) (SIGNALP)
LCOR_00084.1	-2.12142	0.229821	0.121295	0.527779	FALSE	0.610394	---NA---	92	0			0	0		SignalP-NN(euk) (SIGNALP)
LCOR_00085.1	-0.970349	0.510382	51.6241	101.148	FALSE	0.226097	histone deacetylase complex subunit sap18	184	20	6.0036e-42	64.25%	0	0		IPR010516
LCOR_00086.1	-1.38408	0.383133	7.63282	19.9221	FALSE	0.0196426	alpha- -mannosyltransferase alg2	451	20	0	65.15%	2	P:biosynthetic process; F:glycolipid 6-alpha-mannosyltransferase activity	EC:2.4.1.232	IPR001296; IPR027054; G3DSA:3.40.50.2000 (GENE3D), PTHR12526 (PANTHER), tmhmm (TMHMM), SSF53756 (SUPERFAMILY)
LCOR_00088.1	-2.21048	0.216063	1.41919	6.56843	TRUE	0.00232803	nadp-dependent leukotriene b4 12-hydroxydehydrogenase	347	20	6.98147e-88	56.25%	3	F:zinc ion binding; F:oxidoreductase activity; P:oxidation-reduction process	0	IPR002085; IPR011032; IPR013149; IPR016040; IPR020843; PTHR11695:SF5 (PANTHER), SSF51735 (SUPERFAMILY)
LCOR_00089.1	-0.139246	0.907993	70.4831	77.6251	FALSE	0.265925	phosphoribosylglycinamide formyltransferase	204	20	7.8463e-109	71.35%	3	F:methyltransferase activity; F:phosphoribosylglycinamide formyltransferase activity; P:'de novo' IMP biosynthetic process	EC:2.1.1.0; EC:2.1.2.2	IPR001555; IPR002376; IPR004607; PTHR10520 (PANTHER), PTHR10520:SF9 (PANTHER)
LCOR_00090.1	-Inf	0	0	0.204277	FALSE	0.698654	---NA---	99	0			0	0		no IPS match
LCOR_00092.1	-0.627711	0.647202	6.97376	10.7752	FALSE	0.952288	is605 central region	530	4	9.74087e-31	57.0%	0	0		IPR010095; PTHR30405 (PANTHER), PTHR30405:SF0 (PANTHER)
LCOR_00093.1	-0.48585	0.714076	437.578	612.788	FALSE	0.883096	40s ribosomal protein s1	322	20	8.58937e-145	81.85%	3	F:structural constituent of ribosome; C:ribosome; P:translation	0	IPR001593; IPR018281; PTHR11830 (PANTHER)
LCOR_00094.1	0.0852884	1.0609	3.28297	3.09451	FALSE	0.363679	f-box lrr-repeat protein 20 isoform 1	456	20	3.15889e-139	50.95%	4	C:cytoplasm; P:biological_process; F:protein binding; C:cellular_component		IPR006553; G3DSA:3.80.10.10 (GENE3D), PTHR23125 (PANTHER), SSF52047 (SUPERFAMILY)
LCOR_00095.1	-0.601663	0.658994	8.05714	12.2264	FALSE	0.964817	dead box rna helicase	758	20	0	73.65%	3	F:nucleic acid binding; F:ATP binding; F:ATP-dependent helicase activity	0	IPR000629; IPR001650; IPR011545; IPR014001; IPR014014; IPR025313; IPR027417; G3DSA:3.40.50.300 (GENE3D), PTHR24031 (PANTHER), PTHR24031:SF54 (PANTHER)
LCOR_00096.1	0.117964	1.0852	3.62391	3.33939	FALSE	0.277354	---NA---	154	0			0	0		no IPS match
LCOR_00097.1	-0.224479	0.855904	2.67852	3.12946	FALSE	0.621207	mfs general substrate transporter	575	20	2.54752e-118	54.65%	3	F:transporter activity; P:transmembrane transport; C:integral to membrane	0	IPR001411; IPR005829; IPR011701; IPR016196; IPR020846; G3DSA:1.20.1250.20 (GENE3D), PTHR24003 (PANTHER), PTHR24003:SF124 (PANTHER), tmhmm (TMHMM)
LCOR_00098.1	-0.0654865	0.955623	0.0386631	0.0404585	FALSE	1	hypothetical protein RO3G_03309	233	1	4.84223e-38	57.0%	3	F:sequence-specific DNA binding transcription factor activity; F:zinc ion binding; F:sequence-specific DNA binding	0	IPR000679; IPR013088; PTHR10071 (PANTHER), PTHR10071:SF112 (PANTHER), SSF57716 (SUPERFAMILY)
LCOR_00098.1	-0.135462	0.910378	1.43493	1.5762	FALSE	0.682968	hypothetical protein RO3G_03309	245	1	4.06075e-38	57.0%	3	F:sequence-specific DNA binding transcription factor activity; F:zinc ion binding; F:sequence-specific DNA binding	0	IPR000679; IPR013088; PTHR10071 (PANTHER), PTHR10071:SF112 (PANTHER), SSF57716 (SUPERFAMILY)
LCOR_00099.1	-0.355998	0.781329	1.13897	1.45774	FALSE	0.852314	---NA---	134	0			0	0		tmhmm (TMHMM)
LCOR_00100.1	-0.395472	0.760241	0.22033	0.289816	FALSE	1	---NA---	91	0			0	0		no IPS match
LCOR_00101.1	-1.37679	0.385075	1.91315	4.96825	FALSE	0.0368268	plasma-membrane proton-e	956	20	0	77.85%	7	P:cation transport; C:integral to membrane; F:cation-transporting ATPase activity; P:ATP catabolic process; P:ATP biosynthetic process; F:nucleotide binding; F:metal ion binding	0	IPR001757; IPR004014; IPR006534; IPR008250; IPR018303; IPR023214; IPR023298; IPR023299; PTHR24093:SF127 (PANTHER), tmhmm (TMHMM), SSF81653 (SUPERFAMILY), SSF81665 (SUPERFAMILY)
LCOR_00102.1	-0.223838	0.856285	11.8624	13.8533	FALSE	0.387985	hypothetical protein RO3G_01695	388	3	3.82791e-47	55.0%	3	F:sequence-specific DNA binding transcription factor activity; F:zinc ion binding; F:sequence-specific DNA binding	0	IPR000679; IPR013088; PTHR10071 (PANTHER), SSF57716 (SUPERFAMILY)
LCOR_00103.1	1.05582	2.0789	15.9406	7.66783	TRUE	1.52121e-07	atp-dependent rna helicase ddx11-like protein 8-like	835	20	0	57.7%	5	F:ATP binding; F:ATP-dependent DNA helicase activity; P:nucleobase-containing compound metabolic process; F:DNA binding; P:DNA duplex unwinding	0	IPR002464; IPR006554; IPR006555; IPR010614; IPR013020; IPR014013; IPR027076; IPR027417; G3DSA:3.40.50.300 (GENE3D), PTHR11472 (PANTHER)
LCOR_00104.1	-1.17697	0.442278	42.2842	95.6054	FALSE	0.0527254	gtp-binding protein sas1	212	20	5.67318e-111	91.25%	8	F:GTP binding; P:small GTPase mediated signal transduction; F:GTPase activity; P:GTP catabolic process; P:intracellular protein transport; P:nucleocytoplasmic transport; C:intracellular; C:membrane	0	IPR001806; IPR002041; IPR003578; IPR003579; IPR005225; IPR020849; IPR024156; IPR027417; G3DSA:3.40.50.300 (GENE3D), PTHR24073 (PANTHER), PTHR24073:SF38 (PANTHER), PS51419 (PROFILE)
LCOR_00105.1	-0.21709	0.860299	1152.91	1340.12	FALSE	0.352746	60s ribosomal protein l33	108	20	6.38116e-54	82.9%	3	F:structural constituent of ribosome; C:ribosome; P:translation	0	IPR001780; IPR009000; PTHR10902:SF0 (PANTHER)
LCOR_00106.1	-0.387202	0.764611	17.8393	23.3312	FALSE	0.698654	kinesin-like protein kif24	803	20	0	75.1%	5	F:protein binding; F:microtubule motor activity; F:ATP binding; C:microtubule associated complex; P:microtubule-based movement	0	IPR001660; IPR001752; IPR013761; IPR019821; IPR021129; IPR027417; PTHR24115 (PANTHER), PTHR24115:SF0 (PANTHER)
LCOR_00107.1	-1.23159	0.425848	3.73401	8.76842	FALSE	0.0567602	integrator complex subunit 7	970	20	6.16338e-88	61.65%	1	F:binding	0	IPR016024; PTHR13322 (PANTHER), PTHR13322:SF2 (PANTHER)
LCOR_00108.1	0.81978	1.76514	47.0367	26.6476	TRUE	0.000233236	atp-dependent bile acid permease	1575	20	0	60.05%	4	F:ATP binding; C:integral to membrane; P:transmembrane transport; F:ATPase activity	EC:3.6.1.3	IPR001140; IPR003439; IPR003593; IPR011527; IPR017871; IPR017940; IPR027417; G3DSA:1.20.1560.10 (GENE3D), G3DSA:3.40.50.300 (GENE3D), PTHR24223 (PANTHER), SignalP-NN(euk) (SIGNALP), tmhmm (TMHMM)
LCOR_00110.1	-2.10782	0.231998	6.91217	29.7941	TRUE	9.55614e-07	nadph-dependent diflavin oxidoreductase 1	591	20	0	64.75%	4	F:iron ion binding; F:FMN binding; P:oxidation-reduction process; F:oxidoreductase activity	0	IPR001094; IPR001433; IPR001709; IPR003097; IPR008254; IPR017927; IPR017938; IPR023173; G3DSA:2.40.30.10 (GENE3D), G3DSA:3.40.50.360 (GENE3D), G3DSA:3.40.50.80 (GENE3D), PTHR19384 (PANTHER), PTHR19384:SF10 (PANTHER), SSF52218 (SUPERFAMILY), SSF52343 (SUPERFAMILY)
LCOR_00111.1	-1.50973	0.351177	1.06124	3.02194	FALSE	0.069993	---NA---	511	0			1	F:protein binding	0	IPR001810; IPR011990; G3DSA:3.80.10.10 (GENE3D), PTHR23125 (PANTHER), PF12937 (PFAM), SSF48452 (SUPERFAMILY)
LCOR_00112.1	-0.703716	0.613989	28.076	45.7272	FALSE	0.701586	palmitoyltransferase pfa4	357	20	1.83939e-84	60.4%	1	F:zinc ion binding	0	IPR001594; PTHR22883 (PANTHER), SignalP-NN(euk) (SIGNALP), tmhmm (TMHMM)
LCOR_00113.1	1.28157	2.43103	1.32282	0.54414	FALSE	0.0583519	protein fam72a	163	20	2.03318e-46	69.55%	3	C:cellular_component; F:molecular_function; P:biological_process		IPR026768
LCOR_00114.1	-1.20116	0.434924	8.9263	20.5238	FALSE	0.126013	---NA---	390	0			0	0		no IPS match
LCOR_00115.1	-0.881366	0.542853	12.2811	22.6232	FALSE	0.35238	ubiquitin carboxyl-terminal hydrolase 25 28	1066	20	3.67308e-123	55.4%	2	F:ubiquitin thiolesterase activity; P:ubiquitin-dependent protein catabolic process	EC:3.1.2.15	IPR001394; IPR018200; PTHR24006 (PANTHER), PTHR24006:SF40 (PANTHER), SSF54001 (SUPERFAMILY)
LCOR_00116.1	-0.257926	0.836289	107.438	128.47	FALSE	0.451921	reduced viability upon starvation protein 167	404	20	3.31445e-71	54.2%	2	F:protein binding; C:cytoplasm	0	IPR001452; IPR004148; IPR027267; G3DSA:2.30.30.40 (GENE3D), PTHR10321 (PANTHER), PTHR10321:SF4 (PANTHER), SSF103657 (SUPERFAMILY)
LCOR_00117.1	0.0991574	1.07115	6.21546	5.80262	FALSE	0.332477	---NA---	88	0			0	0		no IPS match
LCOR_00118.1	Inf	Inf	0.0623454	0	FALSE	1	---NA---	143	0			0	0		no IPS match
LCOR_00119.1	-2.19978	0.217671	0.168654	0.77481	FALSE	0.0229999	abc transporter	1517	20	0	59.7%	4	F:ATP binding; C:integral to membrane; P:transmembrane transport; F:ATPase activity	EC:3.6.1.3	IPR001140; IPR003439; IPR003593; IPR011527; IPR017871; IPR017940; IPR027417; G3DSA:1.20.1560.10 (GENE3D), G3DSA:3.40.50.300 (GENE3D), PTHR24223 (PANTHER), SignalP-NN(euk) (SIGNALP), tmhmm (TMHMM)
LCOR_00120.1	-1.71054	0.305546	0.243336	0.796399	FALSE	0.536438	---NA---	83	0			0	0		no IPS match
LCOR_00121.1	-1.7342	0.300575	1.47848	4.91883	FALSE	0.0793123	duf1479 domain protein	450	20	1.68274e-121	59.8%	0	0		IPR010856; IPR027443; PTHR30613 (PANTHER), SSF51197 (SUPERFAMILY)
LCOR_00122.1	1.00488	2.00677	4.70946	2.34679	FALSE	0.0155542	---NA---	132	0			3	P:sodium ion transport; F:sodium:hydrogen antiporter activity; C:membrane	0	IPR013928; SignalP-NN(euk) (SIGNALP), tmhmm (TMHMM)
LCOR_00123.1	2.02244	4.06271	951.398	234.178	TRUE	7.65412e-10	---NA---	208	0			2	F:sequence-specific DNA binding transcription factor activity; F:sequence-specific DNA binding	0	IPR004827; G3DSA:1.20.5.170 (GENE3D)
LCOR_00124.1	0.750931	1.68288	612.665	364.057	TRUE	6.30602e-05	---NA---	78	0			0	0		IPR013726; SignalP-NN(euk) (SIGNALP)
LCOR_00125.1	1.01525	2.02125	2950.89	1459.93	TRUE	2.36618e-05	---NA---	98	0			0	0		no IPS match
LCOR_00126.1	0.725634	1.65363	144.819	87.5765	TRUE	4.5721e-05	---NA---	188	0			0	0		no IPS match
LCOR_00127.1	1.02167	2.03027	52.9275	26.0692	TRUE	1.00652e-05	---NA---	98	0			0	0		tmhmm (TMHMM)
LCOR_00128.1	-0.308107	0.807701	19.1284	23.6826	FALSE	0.461188	transcription factor tfiih complex subunit tfb2	464	20	1.88652e-172	68.65%	3	C:core TFIIH complex; F:ATP-dependent DNA helicase activity; P:nucleotide-excision repair	0	IPR004598
LCOR_00129.1	-1.06051	0.479463	185.093	386.043	FALSE	0.177786	---NA---	157	0			0	0		no IPS match
LCOR_00130.1	-0.51962	0.697555	4.49504	6.44399	FALSE	0.987776	integrator complex subunit 3	1033	20	1.19115e-104	60.1%	10	C:nucleus; P:response to DNA damage stimulus; P:snRNA processing; C:integrator complex; P:G2/M transition checkpoint; F:molecular_function; P:response to ionizing radiation; P:DNA repair; C:SOSS complex; F:protein binding		IPR019333; PTHR13587 (PANTHER)
LCOR_00131.1	-0.912063	0.531425	10.5803	19.9094	FALSE	0.312299	cohesin-associated protein pds5	1133	20	0	51.05%	1	F:binding	0	IPR011989; IPR016024; PTHR12663 (PANTHER), PTHR12663:SF0 (PANTHER)
LCOR_00132.1	-0.204474	0.867855	15.0001	17.2841	FALSE	0.360942	hypothetical protein RO3G_14687	413	1	7.09081e-118	69.0%	1	F:protein binding	0	IPR001440; IPR011990; IPR013026; IPR019734; tmhmm (TMHMM), SSF48452 (SUPERFAMILY)
LCOR_00133.1	-0.740503	0.598531	4.22779	7.06361	FALSE	0.764154	---NA---	1137	0			3	F:Rho guanyl-nucleotide exchange factor activity; C:intracellular; P:regulation of Rho protein signal transduction	0	IPR000219; PTHR12673 (PANTHER)
LCOR_00134.1	0.00979106	1.00681	20.2047	20.068	FALSE	0.0778048	hypothetical protein RO3G_00108	456	1	2.88622e-59	64.0%	1	F:binding	0	IPR007701; IPR016024; PTHR12354 (PANTHER)
LCOR_00135.1	0.362425	1.28558	100.513	78.185	TRUE	0.00340909	hypothetical protein RO3G_16926	269	1	5.8001e-54	66.0%	0	0		no IPS match
LCOR_00136.1	-0.730415	0.602731	15.9733	26.5016	FALSE	0.698654	---NA---	233	0			3	C:spindle microtubule; P:mitotic spindle organization in nucleus; C:DASH complex	0	IPR013251
LCOR_00137.1	-1.3738	0.385875	4.87959	12.6455	FALSE	0.0159239	dna replication licensing factor cdc19 (cell division control protein 19)	905	20	0	78.05%	5	F:DNA binding; F:ATP binding; F:DNA helicase activity; P:DNA-dependent DNA replication initiation; C:MCM complex	0	IPR001208; IPR008045; IPR012340; IPR018525; IPR027417; G3DSA:3.30.1640.10 (GENE3D), G3DSA:3.40.50.300 (GENE3D), PTHR11630 (PANTHER), PTHR11630:SF44 (PANTHER)
LCOR_00138.1	2.70999	6.54315	33.3291	5.09374	TRUE	4.9443e-22	hypothetical protein RO3G_11602	344	4	4.21551e-32	76.75%	2	F:zinc ion binding; F:nucleic acid binding	0	IPR007087; IPR013087; IPR015880; PTHR11389 (PANTHER), PF13894 (PFAM), SSF57667 (SUPERFAMILY)
LCOR_00139.1	-0.39083	0.762691	12.7272	16.6872	FALSE	0.683973	hypothetical protein RO3G_09283	1345	5	8.55698e-86	55.2%	2	F:protein binding; F:phospholipid binding	0	IPR001849; IPR004182; IPR011993; PTHR14248 (PANTHER), PTHR14248:SF9 (PANTHER), tmhmm (TMHMM), SSF103657 (SUPERFAMILY), SSF50729 (SUPERFAMILY)
LCOR_00140.1	-0.472615	0.720657	122.841	170.456	FALSE	0.839458	vacuolar sorting protein	693	20	0	83.05%	2	F:GTP binding; F:GTPase activity	0	IPR000375; IPR001401; IPR003130; IPR019762; IPR020850; IPR022812; IPR027417; G3DSA:3.40.50.300 (GENE3D), PTHR11566:SF12 (PANTHER)
LCOR_00141.1	-1.00975	0.496631	20.9641	42.2127	FALSE	0.186685	related to bem3-gtpase-activating protein	1062	20	0	77.75%	5	C:intracellular; P:signal transduction; F:protein binding; P:cell communication; F:phosphatidylinositol binding	0	IPR000198; IPR001683; IPR001849; IPR008936; IPR011993; PTHR23176 (PANTHER), SSF50729 (SUPERFAMILY)
LCOR_00143.1	-0.869881	0.547192	8.92149	16.3041	FALSE	0.429807	camp-dependent protein kinase	405	20	4.00545e-124	69.75%	4	F:ATP binding; P:protein phosphorylation; F:protein serine/threonine kinase activity; F:protein tyrosine kinase activity	EC:2.7.11.0; EC:2.7.10.0	IPR000719; IPR000961; IPR002290; IPR008271; IPR011009; IPR020635; G3DSA:1.10.510.10 (GENE3D), G3DSA:3.30.200.20 (GENE3D), PTHR24356 (PANTHER), PTHR24356:SF0 (PANTHER)
LCOR_00144.1	-0.44472	0.734727	8.32049	11.3246	FALSE	0.78926	sodium calcium exchanger protein	694	20	0	53.95%	2	C:integral to membrane; P:transmembrane transport	0	IPR004837; PTHR12266 (PANTHER), PTHR12266:SF0 (PANTHER), SignalP-NN(euk) (SIGNALP), tmhmm (TMHMM)
LCOR_00145.1	-0.168288	0.889898	396.069	445.072	FALSE	0.288262	gtp-binding protein ypt5	212	20	4.19617e-117	84.6%	8	F:GTP binding; P:small GTPase mediated signal transduction; F:GTPase activity; P:GTP catabolic process; P:intracellular protein transport; P:nucleocytoplasmic transport; C:intracellular; C:membrane	0	IPR001806; IPR002041; IPR003578; IPR003579; IPR005225; IPR020849; IPR027417; G3DSA:3.40.50.300 (GENE3D), PTHR24073 (PANTHER), PTHR24073:SF132 (PANTHER), PS51419 (PROFILE)
LCOR_00147.1	-0.143031	0.905614	3.23052	3.56722	FALSE	0.509996	hypothetical protein RO3G_16990	338	1	8.34787e-57	62.0%	5	F:RNA binding; C:nucleus; P:RNA processing; C:ribonucleoprotein complex; F:nucleotide binding	0	IPR000504; IPR002344; IPR006630; IPR011991; IPR012677; PTHR22792 (PANTHER), PTHR22792:SF2 (PANTHER), PF14259 (PFAM), SSF46785 (SUPERFAMILY), SSF54928 (SUPERFAMILY)
LCOR_00149.1	-1.83275	0.28073	7.2779	25.925	TRUE	0.000298418	probable gcy1-galactose-induced protein of aldo keto reductase family	306	20	3.05534e-143	66.85%	2	F:oxidoreductase activity; P:oxidation-reduction process	0	IPR001395; IPR018170; IPR020471; IPR023210; PTHR11732:SF34 (PANTHER)
LCOR_00150.1	-1.15626	0.448675	5.84935	13.037	FALSE	0.209872	---NA---	349	0			2	F:sequence-specific DNA binding transcription factor activity; F:sequence-specific DNA binding	0	IPR001356; IPR009057
LCOR_00151.1	0.132331	1.09606	2.67509	2.44063	FALSE	0.515456	cyanamide hydratase	241	20	6.17028e-49	54.55%	2	F:phosphoric diester hydrolase activity; F:metal ion binding	EC:3.1.4.0	IPR006674; IPR017771
LCOR_00152.1	-0.908907	0.532588	0.340065	0.638513	FALSE	0.81998	---NA---	462	0			0	0		IPR010730
LCOR_00153.1	-0.655051	0.635053	210.494	331.459	FALSE	0.880553	utp-glucose-1-phosphate uridylyltransferase	507	20	0	83.7%	2	P:metabolic process; F:nucleotidyltransferase activity	EC:2.7.7.0	IPR002618; IPR016267; G3DSA:3.90.550.10 (GENE3D), SSF53448 (SUPERFAMILY)
LCOR_00154.1	-0.817342	0.567487	10.5756	18.6358	FALSE	0.561384	hypothetical protein RO3G_06789	381	2	4.10862e-54	55.0%	0	0		SignalP-NN(euk) (SIGNALP), tmhmm (TMHMM)
LCOR_00155.1	-0.202886	0.868811	7.62428	8.77554	FALSE	0.475979	---NA---	181	0			0	0		no IPS match
LCOR_00156.1	-1.22362	0.428208	4.00895	9.36216	FALSE	0.0702009	cleavage and polyadenylation specificity factor subunit 3-like	749	20	0	73.45%	1	F:hydrolase activity	0	IPR001279; IPR011108; IPR021718; IPR022712; PTHR11203 (PANTHER), PTHR11203:SF11 (PANTHER), SSF56281 (SUPERFAMILY)
LCOR_00157.1	-0.519419	0.697653	26.7422	38.3316	FALSE	0.979601	hypothetical protein RO3G_14510	304	1	1.35434e-78	79.0%	0	0		tmhmm (TMHMM)
LCOR_00158.1	-2.75007	0.148644	0.0262616	0.176674	FALSE	0.323141	---NA---	428	0			0	0		IPR010730
LCOR_00159.1	-0.467543	0.723195	5.94504	8.22051	FALSE	0.998954	---NA---	77	0			0	0		SignalP-NN(euk) (SIGNALP)
LCOR_00160.1	0.50267	1.41683	3.72602	2.62982	FALSE	0.0970087	---NA---	148	0			0	0		SignalP-NN(euk) (SIGNALP)
LCOR_00161.1	-0.98753	0.50434	31.751	62.9554	FALSE	0.207633	hypothetical protein RO3G_01900	493	2	7.63448e-66	59.5%	0	0		IPR010492; IPR016181; tmhmm (TMHMM)
LCOR_00162.1	-0.377633	0.769699	0.696746	0.905219	FALSE	0.866456	multi-sensor hybrid histidine kinase	2023	20	1.14246e-55	60.55%	7	F:ATP binding; P:protein phosphorylation; F:two-component response regulator activity; P:two-component signal transduction system (phosphorelay); F:two-component sensor activity; C:membrane; F:protein tyrosine kinase activity	EC:2.7.10.0	IPR000719; IPR001789; IPR002290; IPR003594; IPR003661; IPR004358; IPR005467; IPR009030; IPR009082; IPR011006; IPR011009; IPR020635; IPR025997; G3DSA:1.10.510.10 (GENE3D), G3DSA:3.30.200.20 (GENE3D), G3DSA:3.40.50.2300 (GENE3D), PTHR24423 (PANTHER), PTHR24423:SF360 (PANTHER), SignalP-NN(euk) (SIGNALP), tmhmm (TMHMM), SSF53822 (SUPERFAMILY)
LCOR_00163.1	-0.572636	0.672387	36.2708	53.9433	FALSE	1	---NA---	89	0			0	0		IPR019034; PTHR16967 (PANTHER)
LCOR_00164.1	Inf	Inf	0.018567	0	FALSE	1	glycoside hydrolase family 37 protein	603	20	0	56.1%	2	P:trehalose metabolic process; F:catalytic activity	0	IPR001661; IPR008928; IPR018232; PTHR23403:SF1 (PANTHER), SignalP-NN(euk) (SIGNALP), tmhmm (TMHMM)
LCOR_00165.1	-0.706978	0.612602	7.8953	12.8881	FALSE	0.886472	---NA---	107	0			0	0		no IPS match
LCOR_00166.1	-0.817988	0.567233	7.31261	12.8917	FALSE	0.738371	---NA---	80	0			0	0		no IPS match
LCOR_00167.1	0.675754	1.59743	50.1394	31.3875	TRUE	4.46238e-05	---NA---	465	0			0	0		no IPS match
LCOR_00168.1	2.79052	6.91877	584.441	84.4718	TRUE	1.64707e-11	hypothetical protein RO3G_05900	158	2	5.89996e-31	61.0%	0	0		SignalP-NN(euk) (SIGNALP), tmhmm (TMHMM)
LCOR_00169.1	-0.706528	0.612793	13.8249	22.5605	FALSE	0.740836	bromodomain and phd finger-containing protein 3	1216	20	0	63.5%	2	F:protein binding; F:zinc ion binding	0	IPR000313; IPR001487; IPR001965; IPR011011; IPR013083; IPR019542; IPR019786; IPR019787; G3DSA:2.30.30.160 (GENE3D), PTHR13793 (PANTHER), PTHR13793:SF30 (PANTHER), PF13831 (PFAM), PF13832 (PFAM), SSF63748 (SUPERFAMILY)
LCOR_00170.1	0.851167	1.80396	158.026	87.5998	TRUE	6.51659e-05	glycosyltransferase family 2 protein	1918	20	0	59.95%	4	F:heme binding; F:motor activity; F:ATP binding; C:myosin complex	0	IPR001199; IPR001609; IPR004835; IPR027417; PTHR13140 (PANTHER), tmhmm (TMHMM), SSF53448 (SUPERFAMILY)
LCOR_00171.1	-0.443093	0.735556	45.2522	61.5211	FALSE	0.791399	---NA---	171	0			1	F:calcium ion binding	0	IPR002048; IPR011992; IPR018247; PTHR19237 (PANTHER), SignalP-NN(euk) (SIGNALP), SSF47473 (SUPERFAMILY)
LCOR_00173.1	-0.559328	0.678618	4.82645	7.11218	FALSE	1	---NA---	236	0			0	0		SignalP-NN(euk) (SIGNALP), tmhmm (TMHMM)
LCOR_00174.1	0.133286	1.09679	18.6976	17.0476	FALSE	0.0498341	hypothetical protein RO3G_16663	348	1	1.70866e-49	55.0%	0	0		tmhmm (TMHMM)
LCOR_00175.1	-1.87144	0.2733	2.81543	10.3016	TRUE	0.00316488	dna topoisomerase 3-beta-1	293	20	5.14513e-152	71.05%	3	F:DNA topoisomerase type I activity; C:chromosome; P:DNA topological change	EC:5.99.1.2	IPR000380; IPR013824; IPR023405; PTHR11390:SF17 (PANTHER)
LCOR_00176.1	-1.54992	0.34153	2.53247	7.41509	FALSE	0.0208737	dna topoisomerase 3-beta-1	562	20	0	70.4%	3	F:DNA topoisomerase type I activity; C:chromosome; P:DNA topological change	EC:5.99.1.2	IPR000380; IPR003601; IPR003602; IPR006171; IPR013497; IPR013824; IPR013825; IPR023405; IPR023406; PTHR11390:SF17 (PANTHER)
LCOR_00177.1	-Inf	0	0	0.0508118	FALSE	0.698654	member of the slc10 carrier family	397	20	2.29256e-132	56.95%	3	C:membrane; F:bile acid:sodium symporter activity; P:sodium ion transport		IPR016833; SignalP-NN(euk) (SIGNALP), tmhmm (TMHMM)
LCOR_00178.1	-0.177159	0.884443	0.555245	0.627791	FALSE	0.666345	hypothetical protein RO3G_16226	415	1	2.09831e-41	51.0%	1	F:protein binding	0	IPR001214; G3DSA:3.90.1410.10 (GENE3D), PTHR13271 (PANTHER), SSF82199 (SUPERFAMILY)
LCOR_00179.1	0.289007	1.2218	11.8225	9.67632	FALSE	0.0304728	related to engulfment and cell motility gene 1 protein	665	20	0	53.55%	3	C:cytoskeleton; P:phagocytosis; F:binding	0	IPR006816; IPR011989; IPR016024; IPR024574; PTHR12771 (PANTHER), PTHR12771:SF4 (PANTHER)
LCOR_00180.1	0.138013	1.10039	20.3527	18.4959	FALSE	0.0375365	brca1-associated protein	619	20	2.80856e-104	54.0%	2	F:zinc ion binding; F:protein binding	0	IPR001607; IPR001841; IPR011422; IPR013083; PTHR24007 (PANTHER), SSF57850 (SUPERFAMILY)
LCOR_00181.1	-0.742067	0.597882	43.7536	73.181	FALSE	0.692027	hypothetical protein RO3G_11563	366	4	9.90968e-107	64.0%	0	0		SignalP-NN(euk) (SIGNALP), tmhmm (TMHMM)
LCOR_00182.1	-Inf	0	0	0.0244227	FALSE	1	hypothetical protein RO3G_04092	353	5	1.50765e-85	63.6%	0	0		tmhmm (TMHMM)
LCOR_00183.1	-0.50774	0.703324	655.451	931.934	FALSE	0.946699	40s ribosomal protein s18	181	20	3.57462e-78	85.15%	4	F:RNA binding; F:structural constituent of ribosome; C:ribosome; P:translation	0	IPR001892; IPR010979; IPR018269; IPR027437; G3DSA:1.10.8.50 (GENE3D)
LCOR_00184.1	-0.268088	0.830419	5.15698	6.21009	FALSE	0.536776	---NA---	684	0			0	0		IPR013877
LCOR_00185.1	0.00817543	1.00568	148.085	147.248	FALSE	0.0951156	gtp-binding protein ypt5	242	20	9.44136e-95	71.1%	8	F:GTP binding; P:small GTPase mediated signal transduction; F:GTPase activity; P:GTP catabolic process; P:intracellular protein transport; P:nucleocytoplasmic transport; C:intracellular; C:membrane	0	IPR001806; IPR002041; IPR003578; IPR003579; IPR005225; IPR020849; IPR027417; G3DSA:3.40.50.300 (GENE3D), PTHR24073 (PANTHER), PTHR24073:SF132 (PANTHER), PS51419 (PROFILE)
LCOR_00186.1	1.61046	3.0535	0.300216	0.0983188	FALSE	0.0931511	e chain structures of complexes of rhizopuspepsin with pepstatin and other statine-containing inhibitors	410	20	7.09068e-79	56.6%	2	F:aspartic-type endopeptidase activity; P:proteolysis	EC:3.4.23.0	IPR001461; IPR001969; IPR021109
LCOR_00187.1	-0.340551	0.78974	12.5023	15.831	FALSE	0.584915	cytoplasmic protein	417	20	6.32717e-161	56.55%	2	F:nucleic acid binding; F:zinc ion binding	0	IPR003604; IPR007087; IPR015880; IPR022755; PTHR13182 (PANTHER), PF12756 (PFAM), SSF57667 (SUPERFAMILY)
LCOR_00188.1	-1.43737	0.369239	30.1887	81.7591	TRUE	0.00759711	developmentally-regulated gtp-binding protein 1	354	20	0	87.45%	1	F:GTP binding	0	IPR004095; IPR005225; IPR006073; IPR006074; IPR012675; IPR012676; IPR027417; G3DSA:3.40.50.300 (GENE3D), PTHR11702 (PANTHER), PTHR11702:SF8 (PANTHER)
LCOR_00191.1	-0.197349	0.872152	42.3515	48.5598	FALSE	0.295624	cysteinyl-trna synthetase	771	20	0	63.6%	3	F:ATP binding; F:cysteine-tRNA ligase activity; P:cysteinyl-tRNA aminoacylation	EC:6.1.1.16	IPR009080; IPR014729; IPR015803; IPR024909; PTHR10890:SF3 (PANTHER), SSF52374 (SUPERFAMILY)
LCOR_00192.1	0.0243724	1.01704	33.1952	32.6391	FALSE	0.0864275	---NA---	518	0			2	F:protein binding; F:zinc ion binding	0	IPR001841; IPR003137; IPR013083; G3DSA:3.50.30.30 (GENE3D), PTHR22765 (PANTHER), SignalP-NN(euk) (SIGNALP), tmhmm (TMHMM), SSF52025 (SUPERFAMILY), SSF57850 (SUPERFAMILY)
LCOR_00193.1	-1.23997	0.423382	13.9939	33.0526	FALSE	0.0369639	rho gtpase-activating protein 32-like	639	20	3.35063e-39	59.95%	4	C:intracellular; P:signal transduction; F:protein binding; F:phospholipid binding	0	IPR000198; IPR001202; IPR001452; IPR001849; IPR008936; IPR011993; G3DSA:2.20.70.10 (GENE3D), G3DSA:2.30.30.40 (GENE3D), PTHR23178 (PANTHER), SSF50729 (SUPERFAMILY)
LCOR_00194.1	-0.572126	0.672625	14.2364	21.1655	FALSE	1	cellular morphogenesis protein	1311	20	0	47.95%	1	F:protein binding	0	IPR001452; IPR011043; IPR024982; G3DSA:2.30.30.40 (GENE3D), PTHR31778 (PANTHER), PTHR31778:SF0 (PANTHER), SignalP-NN(euk) (SIGNALP), tmhmm (TMHMM)
LCOR_00195.1	-2.64988	0.159333	0.0444854	0.279197	FALSE	0.367463	predicted protein	252	20	5.68871e-77	59.05%	0	0		IPR021862; SignalP-NN(euk) (SIGNALP), tmhmm (TMHMM)
LCOR_00197.1	-0.796177	0.575873	5.1205	8.89171	FALSE	0.637901	component of the holoenzyme form of rna polymerase transcription factor tfiih	613	20	0	62.75%	4	F:ATP-dependent DNA helicase activity; P:nucleotide-excision repair; F:ATP binding; F:DNA binding	0	IPR001161; IPR001650; IPR002464; IPR006935; IPR014001; IPR027417; G3DSA:3.40.50.300 (GENE3D), PTHR11274 (PANTHER)
LCOR_00199.1	-1.19807	0.435859	4.17426	9.57709	FALSE	0.127935	rnp domain protein	429	20	2.25863e-63	53.6%	2	F:nucleic acid binding; F:nucleotide binding	0	IPR000504; IPR012677; PTHR23003 (PANTHER), SSF54928 (SUPERFAMILY)
LCOR_00200.1	-0.550117	0.682965	16.0243	23.4628	FALSE	0.992944	cytochrome c1 heme lyase	273	20	2.46763e-98	63.65%	2	F:holocytochrome-c synthase activity; C:mitochondrion	EC:4.4.1.17	IPR000511; PTHR12743:SF0 (PANTHER)
LCOR_00201.1	8.37547	332.098	1138.65	3.42865	TRUE	2.17465e-23	---NA---	88	0			0	0		no IPS match
LCOR_00202.1	2.83736	7.14712	242.477	33.9265	TRUE	1.71693e-14	---NA---	139	0			0	0		no IPS match
LCOR_00203.1	-Inf	0	0	0.103378	FALSE	1	---NA---	90	0			0	0		no IPS match
LCOR_00204.1	0.120462	1.08708	4.50192	4.14128	FALSE	0.349844	---NA---	210	0			0	0		no IPS match
LCOR_00205.1	-0.344878	0.787374	2.6393	3.35203	FALSE	0.902746	---NA---	267	0			0	0		no IPS match
LCOR_00206.1	-1.03549	0.487851	0.716024	1.46771	FALSE	0.883096	---NA---	115	0			0	0		no IPS match
LCOR_00207.1	-0.682055	0.623277	117.797	188.997	FALSE	0.773321	hypothetical protein RO3G_13466	281	4	6.90208e-96	57.25%	0	0		SignalP-NN(euk) (SIGNALP)
LCOR_00208.1	0.0769481	1.05478	38.5107	36.5105	FALSE	0.0455461	nicotinate-nucleotide adenylyltransferase	290	20	1.01122e-114	77.0%	2	P:NAD biosynthetic process; F:nucleotidyltransferase activity	EC:2.7.7.0	IPR004821; IPR005248; IPR014729; PTHR12039:SF0 (PANTHER), SSF52374 (SUPERFAMILY)
LCOR_00209.1	0.00536379	1.00372	86.6557	86.3341	FALSE	0.119542	atp-dependent metallopeptidase hfl	756	20	0	78.0%	7	F:metalloendopeptidase activity; F:ATP binding; P:proteolysis; F:nucleoside-triphosphatase activity; P:protein catabolic process; F:zinc ion binding; C:integral to membrane	EC:3.4.24.0; EC:3.6.1.15	IPR000642; IPR003593; IPR003959; IPR003960; IPR005936; IPR011546; IPR027417; G3DSA:1.10.8.60 (GENE3D), G3DSA:3.40.50.300 (GENE3D), PTHR23076 (PANTHER), PTHR23076:SF11 (PANTHER), SSF140990 (SUPERFAMILY)
LCOR_00210.1	-0.454456	0.729786	24.0636	32.9736	FALSE	0.857324	kiaa1012 protein	1259	20	0	48.3%	4	P:vesicle-mediated transport; P:ER to Golgi vesicle-mediated transport; C:Golgi apparatus; C:cis-Golgi network		IPR013935; IPR024420; PTHR12975:SF6 (PANTHER)
LCOR_00213.1	0.39204	1.31225	0.541009	0.412276	FALSE	0.741145	---NA---	87	0			0	0		tmhmm (TMHMM)
LCOR_00214.1	-1.41995	0.373726	23.4279	62.6873	FALSE	0.0151489	n-acetyltransferase 5	179	20	6.3934e-89	75.95%	1	F:N-acetyltransferase activity	0	IPR000182; IPR016181; PTHR23091 (PANTHER), PTHR23091:SF5 (PANTHER)
LCOR_00215.1	0.391355	1.31162	0.817075	0.622949	FALSE	0.597807	---NA---	138	0			0	0		IPR007529; PTHR13241 (PANTHER), PTHR13241:SF2 (PANTHER), SSF144232 (SUPERFAMILY)
LCOR_00216.1	3.49849	11.3018	5.44189	0.481505	TRUE	1.20442e-09	plasma membrane alkali metal cation h+ antiporter sod22	384	20	1.05314e-75	70.05%	4	P:cation transport; F:solute:hydrogen antiporter activity; C:integral to membrane; P:transmembrane transport	0	IPR006153; PTHR31382 (PANTHER), SignalP-NN(euk) (SIGNALP), tmhmm (TMHMM)
LCOR_00217.1	Inf	Inf	0.0659881	0	FALSE	1	na+ h+ antiporter nha1	171	20	4.61802e-37	67.8%	4	P:cation transport; F:solute:hydrogen antiporter activity; C:integral to membrane; P:transmembrane transport	0	IPR006153; PTHR31382 (PANTHER), SignalP-NN(euk) (SIGNALP), tmhmm (TMHMM)
LCOR_00219.1	-0.831845	0.56181	1.89385	3.37097	FALSE	0.590101	chromatin remodeling complex subunit	1274	20	4.09974e-103	47.0%	3	F:DNA binding; F:ATP binding; F:helicase activity	0	IPR000330; IPR000953; IPR001650; IPR014001; IPR016197; IPR027417; G3DSA:2.40.50.40 (GENE3D), G3DSA:3.40.50.300 (GENE3D), PTHR10799 (PANTHER)
LCOR_00220.1	0.603926	1.51985	703.536	462.899	TRUE	0.00150695	mannose-1-phosphate guanyltransferase	363	20	0	88.9%	2	P:biosynthetic process; F:nucleotidyltransferase activity	EC:2.7.7.0	IPR001451; IPR005835; G3DSA:2.160.10.10 (GENE3D), G3DSA:3.90.550.10 (GENE3D), PTHR22572 (PANTHER), PTHR22572:SF15 (PANTHER), SignalP-NN(euk) (SIGNALP), SSF53448 (SUPERFAMILY)
LCOR_00221.1	-1.28784	0.409564	11.4945	28.0652	FALSE	0.0225391	peptide-n -(n-acetyl-beta-glucosaminyl)asparagine amidase-like	617	20	2.29296e-117	58.15%	1	F:carbohydrate binding	0	IPR001220; IPR002931; IPR008985; IPR013320; PTHR12143 (PANTHER), PTHR12143:SF2 (PANTHER), SSF54001 (SUPERFAMILY)
LCOR_00222.1	-1.02684	0.490783	7.17599	14.6215	FALSE	0.155465	sin3 protein	1368	20	0	57.85%	1	C:nucleus	0	IPR003822; IPR013194; PTHR12346 (PANTHER)
LCOR_00223.1	-1.49527	0.354715	12.1597	34.2802	TRUE	0.00864935	wd repeat-containing protein 61	301	20	4.81763e-139	63.05%	1	F:protein binding	0	IPR001680; IPR015943; IPR017986; IPR018391; IPR019775; IPR020472; PTHR22841 (PANTHER)
LCOR_00224.1	-1.20269	0.434465	4.55145	10.476	FALSE	0.131748	---NA---	372	0			0	0		IPR025204; PTHR31740 (PANTHER), PTHR31740:SF0 (PANTHER)
LCOR_00225.1	0.562215	1.47653	98.7597	66.8861	TRUE	0.000273539	---NA---	339	0			0	0		no IPS match
LCOR_00226.1	0.304189	1.23472	3.75165	3.03845	FALSE	0.276457	---NA---	100	0			0	0		no IPS match
LCOR_00227.1	-1.27615	0.412896	2.1906	5.30546	FALSE	0.150628	hypothetical protein RO3G_06884	451	1	1.57944e-36	68.0%	3	F:snoRNA binding; P:snRNA pseudouridine synthesis; P:ribosome biogenesis	0	IPR007504; IPR009000; G3DSA:2.40.10.230 (GENE3D), PTHR31633 (PANTHER), PTHR31633:SF0 (PANTHER)
LCOR_00228.1	-0.520958	0.696909	0.215908	0.309809	FALSE	1	hypothetical protein RO3G_00644	459	2	8.70065e-33	54.0%	0	0		tmhmm (TMHMM)
LCOR_00229.1	-0.494287	0.709912	79.7312	112.311	FALSE	0.957291	vacuolar protein 8	671	20	0	79.0%	2	F:protein binding; P:vacuole inheritance	0	IPR000225; IPR011989; IPR016024; IPR026958; PTHR23315 (PANTHER), PF05804 (PFAM), SignalP-NN(euk) (SIGNALP), tmhmm (TMHMM)
LCOR_00230.1	-1.67456	0.313261	0.662299	2.11421	FALSE	0.214708	oligopeptide transporter 7-like	758	20	0	64.5%	1	P:transmembrane transport	0	IPR004648; IPR004813; PTHR22601 (PANTHER), tmhmm (TMHMM)
LCOR_00232.1	-0.950468	0.517464	5.03472	9.7296	FALSE	0.482487	---NA---	152	0			0	0		no IPS match
LCOR_00233.1	0.393296	1.31339	3169.64	2413.32	FALSE	0.0177288	elongation factor 3	461	20	0	78.1%	2	F:ATP binding; F:ATPase activity	EC:3.6.1.3	IPR000953; IPR003439; IPR003593; IPR015688; IPR017871; IPR023780; IPR027417; G3DSA:2.40.50.40 (GENE3D), G3DSA:3.40.50.300 (GENE3D), PTHR19211 (PANTHER)
LCOR_00234.1	0.27814	1.21263	2755.18	2272.07	FALSE	0.0438511	elongation factor 3	574	20	0	66.3%	1	F:binding	0	IPR011989; IPR015688; IPR016024; IPR021133; IPR027417; G3DSA:3.40.50.300 (GENE3D), PTHR19211 (PANTHER)
LCOR_00235.1	Inf	Inf	0.0818794	0	FALSE	0.200347	phosphate-repressible phosphate permease	548	20	1.77151e-147	60.95%	3	F:inorganic phosphate transmembrane transporter activity; P:phosphate ion transport; C:membrane	0	IPR001204; PTHR11101:SF9 (PANTHER), SignalP-NN(euk) (SIGNALP), tmhmm (TMHMM)
LCOR_00236.1	-1.20749	0.433021	1.09954	2.53922	FALSE	0.477884	hypothetical protein RO3G_13931	157	1	1.75221e-31	59.0%	0	0		IPR003736; IPR006683; G3DSA:3.10.129.10 (GENE3D), PTHR21660 (PANTHER), SSF54637 (SUPERFAMILY)
LCOR_00237.1	-0.446775	0.733681	44.273	60.3436	FALSE	0.803605	wd repeat protein	587	20	7.81913e-156	61.25%	1	F:protein binding	0	IPR001680; IPR006594; IPR006595; IPR015943; IPR017986; IPR019775; IPR020472; PTHR22838 (PANTHER)
LCOR_00238.1	-0.657114	0.634145	1.24146	1.9577	FALSE	0.947416	acyl- oxidase	685	20	0	68.0%	5	F:acyl-CoA oxidase activity; C:peroxisome; P:fatty acid beta-oxidation; F:acyl-CoA dehydrogenase activity; F:flavin adenine dinucleotide binding	EC:1.3.3.6; EC:1.3.99.3	IPR002655; IPR006091; IPR009075; IPR009100; IPR012258; IPR013786; G3DSA:1.20.140.10 (GENE3D), PTHR10909 (PANTHER)
LCOR_00239.1	Inf	Inf	0.0364598	0	FALSE	1	lipase	246	20	4.44696e-48	51.65%	2	F:triglyceride lipase activity; P:lipid metabolic process	EC:3.1.1.3	IPR002921; G3DSA:3.40.50.1820 (GENE3D), PTHR21493 (PANTHER), SignalP-NN(euk) (SIGNALP), SSF53474 (SUPERFAMILY)
LCOR_00240.1	-1.38831	0.382011	25.6143	67.0511	FALSE	0.0108588	duf382-domain-containing protein	587	20	0	69.7%	1	C:nucleus	0	IPR006568; IPR007180; PTHR12785 (PANTHER), PTHR12785:SF6 (PANTHER)
LCOR_00241.1	-1.23146	0.425885	4.38067	10.286	FALSE	0.0407196	hypothetical protein RO3G_13935	1274	1	0	57.0%	3	F:RNA polymerase II transcription cofactor activity; P:regulation of transcription from RNA polymerase II promoter; C:mediator complex	0	IPR014801
LCOR_00242.1	0.578459	1.49325	1508.08	1009.93	FALSE	0.0313173	---NA---	268	0			0	0		IPR018466
LCOR_00243.1	1.28355	2.43438	4654.17	1911.85	TRUE	1.85618e-05	---NA---	155	0			0	0		IPR018466; SignalP-NN(euk) (SIGNALP)
LCOR_00244.1	0.423836	1.34149	28.0508	20.9102	TRUE	0.00109029	hypothetical protein RO3G_12101	652	1	4.29938e-32	59.0%	1	F:nucleic acid binding	0	IPR000467; IPR001374; G3DSA:3.30.1370.50 (GENE3D), PTHR13948 (PANTHER), SSF82708 (SUPERFAMILY)
LCOR_00245.1	0.542477	1.45647	90.8756	62.3943	TRUE	0.00628459	alkaline phosphatase	580	20	7.91214e-180	65.8%	2	P:metabolic process; F:phosphatase activity	EC:3.1.3.0	IPR001952; IPR017849; IPR017850; IPR018299; PTHR11596 (PANTHER), PTHR11596:SF5 (PANTHER), tmhmm (TMHMM)
LCOR_00246.1	2.14261	4.41561	1355.95	307.082	TRUE	8.98453e-11	phosphotransmitter protein	158	20	6.6701e-50	73.65%	2	P:two-component signal transduction system (phosphorelay); F:signal transducer activity	0	IPR008207
LCOR_00247.1	0.84369	1.79463	4.0563	2.26024	FALSE	0.0656541	---NA---	90	0			0	0		no IPS match
LCOR_00248.1	-1.10191	0.465898	108.431	232.736	FALSE	0.0971624	peptidyl-prolyl cis-trans isomerase nima-interacting 1-like	148	20	6.88867e-86	76.9%	2	F:isomerase activity; F:protein binding	0	IPR000297; IPR001202; G3DSA:2.20.70.10 (GENE3D), G3DSA:3.10.50.40 (GENE3D), PTHR10657 (PANTHER), SSF54534 (SUPERFAMILY)
LCOR_00249.1	-2.59507	0.165503	0.191339	1.1561	FALSE	0.0461993	hypothetical protein RO3G_00665	316	4	3.12802e-45	78.75%	2	F:zinc ion binding; F:nucleic acid binding	0	IPR007087; IPR013087; IPR015880; PTHR11389 (PANTHER), PF13465 (PFAM), SSF57667 (SUPERFAMILY)
LCOR_00250.1	-0.796586	0.57571	11.1479	19.3638	FALSE	0.572127	hypothetical protein RO3G_08491	329	2	1.18016e-71	69.0%	0	0		IPR016712
LCOR_00251.1	-1.73399	0.30062	3.91546	13.0246	TRUE	0.00618495	---NA---	363	0			2	C:nucleus; P:DNA replication	0	IPR019038; PTHR17598 (PANTHER)
LCOR_00252.1	-1.01629	0.494387	7.47974	15.1293	FALSE	0.192558	histone deacetylase	561	20	2.23073e-88	61.95%	31	C:mating-type region heterochromatin; P:nucleosome positioning; C:telomeric heterochromatin; C:nuclear chromatin; F:hydrolase activity; P:chromatin silencing at silent mating-type cassette; C:NuRD complex; C:nucleus; P:regulation of histone methylation; C:chromosome; P:regulation of transcription from RNA polymerase II promoter; F:histone deacetylase activity (H4-K16 specific); P:regulation of tr…		IPR000286; IPR023801; PTHR10625:SF22 (PANTHER), SSF52768 (SUPERFAMILY)
LCOR_00253.1	-0.865398	0.548895	618.896	1127.53	FALSE	0.434125	nucleosome binding protein	97	20	1.91191e-34	74.25%	7	F:DNA binding; C:nucleus; P:regulation of transcription, DNA-dependent; C:chromosome; P:response to DNA damage stimulus; P:DNA repair; P:transcription, DNA-dependent		IPR009071; PR00886 (PRINTS), PTHR13711 (PANTHER)
LCOR_00254.1	-0.749346	0.594873	23.6377	39.7357	FALSE	0.698654	methylenetetrahydrofolate reductase	564	20	0	65.65%	3	F:methylenetetrahydrofolate reductase (NADPH) activity; P:methionine metabolic process; P:oxidation-reduction process	EC:1.5.1.20	IPR003171; IPR004621; G3DSA:3.20.20.220 (GENE3D), PTHR21091 (PANTHER), PTHR21091:SF1 (PANTHER), SSF51730 (SUPERFAMILY)
LCOR_00255.1	0.256116	1.19426	1.27335	1.06622	FALSE	0.205043	sucrose transporter	508	20	4.68626e-142	51.8%	1	P:transmembrane transport		IPR016196; G3DSA:1.20.1250.20 (GENE3D), PTHR19432 (PANTHER), PTHR19432:SF2 (PANTHER), PF13347 (PFAM), tmhmm (TMHMM)
LCOR_00256.1	-1.73771	0.299846	3.61126	12.0437	TRUE	0.000852889	phenylalanyl-trna synthetase	822	20	2.03995e-169	68.75%	7	F:tRNA binding; F:ATP binding; C:cytoplasm; F:phenylalanine-tRNA ligase activity; P:phenylalanyl-tRNA aminoacylation; F:magnesium ion binding; P:tRNA processing	EC:6.1.1.20	IPR002319; IPR004530; IPR005121; IPR006195; IPR016196; G3DSA:1.20.1250.20 (GENE3D), G3DSA:3.30.930.10 (GENE3D), PTHR11538 (PANTHER), PTHR11538:SF16 (PANTHER), SignalP-NN(euk) (SIGNALP), tmhmm (TMHMM), SSF55681 (SUPERFAMILY)
LCOR_00257.1	-1.59624	0.330737	65.0273	196.613	TRUE	0.00229947	deoxyribose-phosphate aldolase	233	20	9.78401e-117	69.35%	3	F:deoxyribose-phosphate aldolase activity; C:cytoplasm; P:deoxyribonucleotide catabolic process	EC:4.1.2.4	IPR002915; IPR011343; IPR013785; SSF51569 (SUPERFAMILY)
LCOR_00258.1	-0.689943	0.619878	0.351198	0.56656	FALSE	1	arabinan-endo -alpha-l-arabinase	313	20	7.23521e-125	70.5%	1	P:carbohydrate metabolic process	0	IPR006710; IPR016840; IPR023296; PTHR22925:SF7 (PANTHER), SignalP-NN(euk) (SIGNALP)
LCOR_00259.1	-1.38463	0.382989	10.0922	26.3512	FALSE	0.0227529	hypothetical protein RO3G_01564	258	5	1.03644e-44	56.8%	0	0		IPR006842
LCOR_00260.1	-0.70244	0.614532	20.0576	32.6388	FALSE	0.913503	---NA---	100	0			0	0		no IPS match
LCOR_00261.1	-2.24923	0.210337	110.565	525.654	TRUE	7.55044e-07	hypothetical protein RO3G_12634	304	2	2.63103e-77	70.0%	0	0		IPR000772; IPR022234; G3DSA:2.80.10.50 (GENE3D)
LCOR_00262.1	1.00157	2.00217	4.75876	2.37679	TRUE	0.000610087	acyl-coenzyme a oxidase i	717	20	0	73.4%	5	F:acyl-CoA oxidase activity; C:peroxisome; P:fatty acid beta-oxidation; F:acyl-CoA dehydrogenase activity; F:flavin adenine dinucleotide binding	EC:1.3.3.6; EC:1.3.99.3	IPR002655; IPR006090; IPR006091; IPR009075; IPR009100; IPR012258; IPR013786; G3DSA:1.20.140.10 (GENE3D), PTHR10909 (PANTHER)
LCOR_00263.1	0.0352709	1.02475	16.87	16.4626	FALSE	0.171423	---NA---	157	0			4	P:mRNA export from nucleus; P:protein export from nucleus; P:nuclear envelope organization; C:nuclear membrane	0	IPR018767; SignalP-NN(euk) (SIGNALP), tmhmm (TMHMM)
LCOR_00265.1	0.743953	1.67476	36.1419	21.5804	TRUE	0.000110921	hmg box protein	328	20	3.9006e-49	61.9%	1	F:protein binding	0	IPR009071; IPR011510; IPR013761; PTHR13711 (PANTHER)
LCOR_00266.1	0.382133	1.30327	876.178	672.294	FALSE	0.03223	---NA---	125	0			0	0		IPR024368
LCOR_00267.1	-0.477271	0.718335	22.6643	31.5511	FALSE	0.86813	yll048cp-like protein	1629	20	0	55.8%	4	F:ATP binding; C:integral to membrane; P:transmembrane transport; F:ATPase activity	EC:3.6.1.3	IPR001140; IPR003439; IPR003593; IPR011527; IPR017940; IPR027417; G3DSA:1.20.1560.10 (GENE3D), G3DSA:3.40.50.300 (GENE3D), PTHR24223 (PANTHER), tmhmm (TMHMM)
LCOR_00268.1	Inf	Inf	0.517202	0	FALSE	0.0760528	---NA---	129	0			0	0		tmhmm (TMHMM)
LCOR_00269.1	-0.386835	0.764806	22.7771	29.7815	FALSE	0.659862	serine threonine-protein kinase nrc-2	596	20	0	72.55%	3	F:ATP binding; P:protein phosphorylation; F:protein tyrosine kinase activity	EC:2.7.10.0	IPR000719; IPR002290; IPR011009; IPR020635; G3DSA:1.10.510.10 (GENE3D), G3DSA:3.30.200.20 (GENE3D), PTHR24351 (PANTHER), PTHR24351:SF29 (PANTHER), tmhmm (TMHMM)
LCOR_00270.1	1.17445	2.25706	570.051	252.563	TRUE	1.76747e-07	pyruvate dehydrogenase kinase	474	20	0	75.15%	1	F:ATP binding	0	IPR003594; IPR005467; IPR018955; PTHR11947 (PANTHER), PTHR11947:SF3 (PANTHER)
LCOR_00271.1	Inf	Inf	0.198349	0	FALSE	0.300813	---NA---	147	0			0	0		no IPS match
LCOR_00273.1	-0.39867	0.758557	36.516	48.1387	FALSE	0.674246	cop9 signalosome complex subunit 3	468	20	7.16164e-84	53.0%	1	F:protein binding	0	IPR000717; PTHR10758 (PANTHER), PTHR10758:SF1 (PANTHER)
LCOR_00275.1	-0.574174	0.671671	22.816	33.9691	FALSE	1	psp1-domain-containing protein	521	20	3.07118e-44	62.3%	2	F:molecular_function; P:biological_process		IPR007557; PTHR21600 (PANTHER), PTHR21600:SF1 (PANTHER)
LCOR_00276.1	0.387299	1.30794	122.349	93.5435	TRUE	0.00421116	6-phosphofructo-2-kinase fructose- -bisphosphatase	425	20	1.34727e-165	68.4%	3	F:ATP binding; F:6-phosphofructo-2-kinase activity; P:fructose metabolic process	EC:2.7.1.105	IPR003094; IPR013078; IPR013079; IPR016260; IPR027417; G3DSA:3.40.50.1240 (GENE3D), G3DSA:3.40.50.300 (GENE3D), SSF53254 (SUPERFAMILY)
LCOR_00277.1	-1.33341	0.396829	14.403	36.2952	FALSE	0.0254747	had-like protein	433	20	5.70332e-153	67.4%	3	F:protein binding; C:mitochondrial inner membrane presequence translocase complex; P:protein transport	0	IPR004274; IPR023214; IPR027111; PTHR12210 (PANTHER), tmhmm (TMHMM)
LCOR_00278.1	-0.776552	0.58376	8.33694	14.2814	FALSE	0.582596	exosome complex exonuclease rrp6	730	20	0	61.45%	5	F:nucleic acid binding; F:3'-5' exonuclease activity; F:nucleotide binding; C:nuclear exosome (RNase complex); P:RNA processing	0	IPR002121; IPR002562; IPR010997; IPR012337; IPR012588; G3DSA:3.30.420.10 (GENE3D), PTHR12124 (PANTHER), PTHR12124:SF2 (PANTHER)
LCOR_00279.1	-0.0689386	0.953339	34.5757	36.268	FALSE	0.127618	hypothetical protein RO3G_04332	415	3	4.79863e-61	74.67%	3	F:phospholipid binding; F:actin binding; C:intracellular	0	IPR001849; IPR002108; IPR011993; G3DSA:3.40.20.10 (GENE3D), PTHR10829 (PANTHER), PTHR10829:SF2 (PANTHER), SSF50729 (SUPERFAMILY), SSF55753 (SUPERFAMILY)
LCOR_00280.1	Inf	Inf	0.26093	0	FALSE	0.303522	---NA---	120	0			0	0		no IPS match
LCOR_00280.1	-0.593981	0.662512	245.702	370.864	FALSE	1	40s ribosomal protein s3	361	20	1.24269e-136	88.05%	4	F:structural constituent of ribosome; P:translation; F:RNA binding; C:small ribosomal subunit	0	IPR001351; IPR004044; IPR005703; IPR009019; PTHR11760 (PANTHER), PTHR11760:SF9 (PANTHER), tmhmm (TMHMM)
LCOR_00281.1	0.310167	1.23985	65.5524	52.8712	FALSE	0.0134114	hypothetical protein RO3G_09301	1180	2	0	62.0%	0	0		IPR000938; PTHR15140 (PANTHER)
LCOR_00282.1	Inf	Inf	0.0271149	0	FALSE	1	---NA---	330	0			0	0		tmhmm (TMHMM)
LCOR_00283.1	-2.65308	0.15898	0.117448	0.738759	FALSE	0.083754	---NA---	268	0			0	0		SignalP-NN(euk) (SIGNALP), tmhmm (TMHMM)
LCOR_00284.1	-0.751479	0.593994	3.09174	5.205	FALSE	0.782182	dimethyladenosine transferase mitochondrial	303	20	3.44728e-121	60.55%	2	P:rRNA modification; F:rRNA methyltransferase activity	0	IPR001737; IPR020596; IPR020598; IPR023165; G3DSA:3.40.50.150 (GENE3D), PTHR11727:SF7 (PANTHER), SSF53335 (SUPERFAMILY)
LCOR_00285.1	-1.9607	0.256903	4.81906	18.7582	TRUE	0.000115764	glycosyltransferase family 57 protein	484	20	3.82e-167	70.0%	1	C:endoplasmic reticulum membrane	0	IPR004856; PTHR12413:SF0 (PANTHER), SignalP-NN(euk) (SIGNALP), tmhmm (TMHMM)
LCOR_00286.1	0.132358	1.09608	40.4159	36.873	FALSE	0.0284143	---NA---	337	0			3	F:protein binding; P:cell communication; F:phosphatidylinositol binding	0	IPR001683; PTHR10555 (PANTHER)
LCOR_00287.1	-0.697484	0.616647	8.77825	14.2355	FALSE	0.798685	ribosomal rna processing protein 36 homolog	303	20	1.71327e-33	65.35%	6	P:rRNA processing; C:ribonucleoprotein complex; P:ribosome biogenesis; C:nucleolus; C:nucleus; P:ribosomal small subunit biogenesis		IPR009292; PTHR21738:SF0 (PANTHER)
LCOR_00288.1	-1.39448	0.380382	1.82201	4.78994	FALSE	0.0976703	acidic mammalian chitinase	398	20	2.90487e-124	51.85%	2	F:chitinase activity; P:chitin catabolic process	EC:3.2.1.14	IPR001223; IPR001579; IPR011583; IPR013781; IPR017853; PTHR11177 (PANTHER), SignalP-NN(euk) (SIGNALP)
LCOR_00289.1	-1.8137	0.284461	13.9319	48.9765	TRUE	0.000122256	cral trio domain protein	446	20	0	55.65%	3	F:transporter activity; C:intracellular; P:transport	0	IPR001071; IPR001251; IPR011074; G3DSA:1.10.8.20 (GENE3D), PTHR10174 (PANTHER), PTHR10174:SF10 (PANTHER)
LCOR_00290.1	-1.34217	0.394426	18.2441	46.2548	FALSE	0.0156654	mfs general substrate transporter	565	20	0	67.15%	2	F:acetyl-CoA transporter activity; C:integral to membrane	0	IPR016196; IPR024371; PTHR12778 (PANTHER), tmhmm (TMHMM)
LCOR_00292.1	-0.419916	0.747468	17.9135	23.9656	FALSE	0.814261	---NA---	232	0			0	0		no IPS match
LCOR_00293.1	-1.18557	0.439652	7.82393	17.7958	FALSE	0.0850422	hypothetical protein RO3G_09472	465	1	3.41867e-52	59.0%	0	0		no IPS match
LCOR_00295.1	1.66392	3.16876	3539.9	1117.12	TRUE	1.3329e-06	hypothetical protein RO3G_05900	213	2	1.19678e-30	62.0%	0	0		tmhmm (TMHMM)
LCOR_00296.1	0.227472	1.17078	22.7306	19.4149	FALSE	0.0156378	related to engulfment and cell motility gene 1 protein	712	20	0	54.8%	3	C:cytoskeleton; P:phagocytosis; F:binding	0	IPR006816; IPR011989; IPR016024; IPR024574; PTHR12771 (PANTHER), PTHR12771:SF4 (PANTHER)
LCOR_00297.1	-1.16539	0.445843	3.82946	8.58926	FALSE	0.0853358	domain-containing protein	956	20	0	51.65%	3	C:intracellular; P:signal transduction; P:phosphatidylinositol dephosphorylation	0	IPR000198; IPR000300; IPR005135; IPR008936; PTHR11200 (PANTHER), PTHR11200:SF25 (PANTHER)
LCOR_00298.1	-0.55677	0.679822	342.842	504.311	FALSE	1	40s ribosomal protein s8	234	20	3.06843e-92	79.3%	3	F:structural constituent of ribosome; C:ribosome; P:translation	0	IPR001047; IPR022309; PTHR10394:SF1 (PANTHER)
LCOR_00299.1	-0.897558	0.536795	5.93709	11.0603	FALSE	0.651125	hypothetical protein RO3G_13478	174	1	6.29727e-28	56.0%	0	0		SignalP-NN(euk) (SIGNALP), tmhmm (TMHMM)
LCOR_00300.1	3.15156	8.88616	5.9555	0.670199	TRUE	1.65861e-09	chy and ring finger domain	361	20	5.97172e-102	66.55%	2	F:protein binding; F:zinc ion binding	0	IPR001841; IPR004039; IPR008913; IPR013083; IPR017921; PTHR21319 (PANTHER), SSF57850 (SUPERFAMILY)
LCOR_00301.1	-0.412801	0.751163	37.184	49.5019	FALSE	0.704207	serine palmitoyltransferase	660	20	0	76.4%	3	F:transferase activity; P:biosynthetic process; F:pyridoxal phosphate binding	0	IPR001917; IPR004839; IPR015421; IPR015422; IPR015424; PTHR13693 (PANTHER), PTHR13693:SF3 (PANTHER)
LCOR_00302.1	1.52665	2.88115	2.69085	0.933949	TRUE	0.000712094	---NA---	346	0			1	F:protein binding	0	IPR001810; G3DSA:3.80.10.10 (GENE3D), PF12937 (PFAM), SSF52047 (SUPERFAMILY)
LCOR_00303.1	1.38299	2.60809	710.707	272.501	TRUE	5.71775e-08	dnaj homolog subfamily b member 1-like	370	20	1.04867e-110	60.45%	2	P:protein folding; F:unfolded protein binding	0	IPR001623; IPR002939; IPR008971; IPR018253; G3DSA:2.60.260.20 (GENE3D), PTHR24077 (PANTHER), PTHR24077:SF13 (PANTHER)
LCOR_00304.1	0.582457	1.4974	8.23344	5.4985	TRUE	0.00598642	lysine-specific demethylase 8-like	425	20	1.74539e-109	60.2%	1	F:protein binding	0	IPR003347; G3DSA:2.60.120.650 (GENE3D), PTHR12461 (PANTHER), PTHR12461:SF3 (PANTHER), PF13621 (PFAM), SSF51197 (SUPERFAMILY)
LCOR_00305.1	0.223135	1.16727	10.253	8.78375	FALSE	0.0280111	---NA---	523	0			0	0		IPR011021
LCOR_00306.1	Inf	Inf	0.0348927	0	FALSE	0.321909	duf726 domain protein	962	20	4.12326e-157	62.1%	1	C:integral to membrane		IPR007941; G3DSA:3.40.50.1820 (GENE3D), PTHR17920:SF3 (PANTHER), tmhmm (TMHMM)
LCOR_00307.1	-1.38162	0.383787	54.6885	142.497	FALSE	0.0134207	cytoplasmic protein	337	20	4.3709e-130	59.55%	1	F:protein binding	0	IPR011990; IPR013026; IPR019734; PTHR22904 (PANTHER), PTHR22904:SF11 (PANTHER), PF13414 (PFAM), SSF48452 (SUPERFAMILY)
LCOR_00308.1	-0.933124	0.523723	5.55997	10.6162	FALSE	0.29479	---NA---	818	0			1	F:protein binding	0	IPR017986; IPR019350
LCOR_00309.1	0.218671	1.16366	28.2997	24.3195	FALSE	0.018274	---NA---	256	0			0	0		no IPS match
LCOR_00310.1	-1.14693	0.451585	92.6494	205.165	FALSE	0.102322	branched-chain amino acid cytosolic	395	20	0	74.25%	2	F:branched-chain-amino-acid transaminase activity; P:branched chain family amino acid metabolic process	EC:2.6.1.42	IPR001544; IPR005786; IPR018300; G3DSA:3.20.10.10 (GENE3D), G3DSA:3.30.470.10 (GENE3D)
LCOR_00311.1	-0.950868	0.517321	13.6248	26.3372	FALSE	0.257811	ser thr protein kinase	642	20	0	66.75%	4	F:ATP binding; P:protein phosphorylation; F:protein serine/threonine kinase activity; F:protein tyrosine kinase activity	EC:2.7.11.0; EC:2.7.10.0	IPR000719; IPR002290; IPR008271; IPR011009; IPR020635; G3DSA:1.10.510.10 (GENE3D), G3DSA:3.10.20.90 (GENE3D), G3DSA:3.30.200.20 (GENE3D), PTHR13902 (PANTHER)
LCOR_00312.1	-2.00247	0.249573	0.111401	0.446368	FALSE	0.201663	---NA---	443	0			0	0		IPR011021
LCOR_00313.1	-1.24385	0.422243	18.6552	44.1813	FALSE	0.0359326	-domain-containing protein	403	20	5.80368e-77	51.75%	3	F:unfolded protein binding; P:protein folding; F:heat shock protein binding		IPR001623; IPR015399; PTHR24077 (PANTHER), PTHR24077:SF1 (PANTHER), tmhmm (TMHMM)
LCOR_00314.1	-0.337731	0.791285	21.2712	26.8818	FALSE	0.613782	ubiquinone biosynthesis protein coq4 mitochondrial	293	20	2.17483e-111	66.8%	1	P:ubiquinone biosynthetic process	0	IPR007715; PTHR12922 (PANTHER), PTHR12922:SF5 (PANTHER)
LCOR_00315.1	2.07113	4.20216	5.64572	1.34353	TRUE	4.39719e-05	isoform c	452	20	4.33021e-128	49.4%	2	F:acid phosphatase activity; F:metal ion binding	EC:3.1.3.2	IPR004843; IPR008963; IPR015914; G3DSA:3.60.21.10 (GENE3D), PTHR22953 (PANTHER), PTHR22953:SF0 (PANTHER), SSF56300 (SUPERFAMILY)
LCOR_00316.1	-1.37108	0.386603	8.09484	20.9384	FALSE	0.0239777	---NA---	444	0			2	F:chromatin binding; F:DNA binding	0	IPR001005; IPR009057; IPR017930; PTHR21717 (PANTHER)
LCOR_00317.1	-1.27609	0.412913	5.52309	13.3759	FALSE	0.0853768	s-adenosyl-l-methionine-dependent methyltransferase	326	20	1.74928e-128	75.2%	3	F:methyltransferase activity; P:metabolic process; P:methylation		G3DSA:3.40.50.150 (GENE3D), PTHR13090 (PANTHER), PF13489 (PFAM), SSF53335 (SUPERFAMILY)
LCOR_00318.1	-0.663004	0.631562	50.9837	80.7264	FALSE	0.788876	rrna 2 -o-methyltransferase fibrillarin	313	20	7.65241e-159	91.1%	4	F:RNA binding; P:rRNA processing; P:tRNA processing; F:methyltransferase activity	EC:2.1.1.0	IPR000692; IPR020813; G3DSA:3.30.200.20 (GENE3D), G3DSA:3.40.50.150 (GENE3D), SSF53335 (SUPERFAMILY)
LCOR_00319.1	Inf	Inf	0.232852	0	FALSE	0.0967222	---NA---	240	0			0	0		no IPS match
LCOR_00320.1	-2.02065	0.246447	0.464827	1.88612	FALSE	0.15354	---NA---	173	0			0	0		no IPS match
LCOR_00322.1	-Inf	0	0	0.0458088	FALSE	1	---NA---	187	0			0	0		no IPS match
LCOR_00323.1	1.02126	2.02969	0.198512	0.0978041	FALSE	0.696361	hypothetical protein RO3G_16829	191	20	1.37812e-47	60.0%	3	F:DNA binding; F:transposase activity; P:DNA integration	0	IPR002492; PTHR23022 (PANTHER), PTHR23022:SF24 (PANTHER)
LCOR_00325.1	-1.68907	0.310126	2.42121	7.80717	TRUE	0.00700965	---NA---	495	0			3	F:DNA binding; F:ATP binding; F:zinc ion binding	0	IPR000330; IPR010666; IPR014001; IPR027417; G3DSA:3.40.50.300 (GENE3D), PTHR10799 (PANTHER), PTHR10799:SF43 (PANTHER)
LCOR_00326.1	-0.0457246	0.968803	0.249647	0.257686	FALSE	0.83262	---NA---	332	0			2	F:protein binding; F:zinc ion binding	0	IPR001965; IPR011011; IPR013083; IPR019786; IPR019787
LCOR_00327.1	-1.53864	0.344209	21.8664	63.5266	TRUE	0.00380668	pyruvate dehydrogenase	477	20	0	48.6%	1	F:catalytic activity	0	IPR001932; IPR015655; PTHR13832:SF98 (PANTHER), SignalP-NN(euk) (SIGNALP)
LCOR_00328.1	-1.02193	0.492458	7.02953	14.2744	FALSE	0.195534	origin recognition complex subunit 2	583	20	1.85903e-97	60.55%	3	C:origin recognition complex; C:nucleus; P:DNA replication	0	IPR007220; PTHR14052:SF0 (PANTHER)
LCOR_00329.1	-1.70617	0.306473	0.100163	0.326826	FALSE	0.435745	hypothetical protein RO3G_12571	559	2	1.21e-60	50.0%	1	C:integral to membrane	0	IPR008630; SignalP-NN(euk) (SIGNALP), tmhmm (TMHMM)
LCOR_00330.1	-0.985901	0.50491	10.3404	20.4797	FALSE	0.23927	n-alpha-acetyltransferase auxiliary subunit	721	20	3.3181e-75	43.9%	11	P:smooth muscle cell proliferation; C:cytoplasm; C:plasma membrane; C:nucleus; P:negative regulation of apoptotic process; P:blood vessel morphogenesis; P:multicellular organismal development; P:positive regulation of cell proliferation; P:somitogenesis; P:regulation of TOR signaling cascade; C:nucleolus		IPR007244; PTHR21373 (PANTHER)
LCOR_00331.1	0.356382	1.28021	99.2258	77.5073	TRUE	0.00469693	related to vps9 (involved in vacuole trafficking)	699	20	2.39255e-121	69.05%	1	F:protein binding	0	IPR003123; IPR003892; IPR009060; IPR013995; G3DSA:1.10.8.10 (GENE3D), PTHR23101 (PANTHER), PTHR23101:SF25 (PANTHER), SSF109993 (SUPERFAMILY)
LCOR_00332.1	1.44081	2.71474	268.934	99.0645	TRUE	1.1666e-09	probable glucokinase	453	20	0	62.0%	2	F:ATP binding; P:carbohydrate metabolic process	0	IPR001312; IPR022672; IPR022673; G3DSA:3.30.420.40 (GENE3D), G3DSA:3.40.367.20 (GENE3D), SSF53067 (SUPERFAMILY)
LCOR_00333.1	-1.0255	0.491242	41.6963	84.8794	FALSE	0.192246	chorismate mutase	261	20	7.85221e-109	66.85%	2	F:chorismate mutase activity; P:aromatic amino acid family biosynthetic process	EC:5.4.99.5	IPR008238; IPR020822; PTHR21145:SF0 (PANTHER)
LCOR_00334.1	-1.74056	0.299254	4.13902	13.8312	FALSE	0.0463948	---NA---	88	0			0	0		SignalP-NN(euk) (SIGNALP), tmhmm (TMHMM)
LCOR_00336.1	-1.133	0.455967	50.4908	110.734	FALSE	0.0734067	gtp-binding protein rho3	201	20	2.08402e-97	76.65%	8	F:GTP binding; P:small GTPase mediated signal transduction; F:GTPase activity; P:GTP catabolic process; P:intracellular protein transport; P:nucleocytoplasmic transport; C:intracellular; C:membrane	0	IPR001806; IPR002041; IPR003578; IPR003579; IPR005225; IPR020849; IPR027417; G3DSA:3.40.50.300 (GENE3D), PTHR24072 (PANTHER), PTHR24072:SF30 (PANTHER)
LCOR_00337.1	-0.569667	0.673772	9.94284	14.757	FALSE	0.984695	bzip transcription factor	340	9	2.86201e-64	79.11%	2	F:sequence-specific DNA binding transcription factor activity; F:sequence-specific DNA binding	0	IPR004827; IPR021755; G3DSA:1.20.5.170 (GENE3D), PTHR19304 (PANTHER)
LCOR_00338.1	-0.880309	0.543251	4.20456	7.73963	FALSE	0.71192	---NA---	123	0			0	0		no IPS match
LCOR_00339.1	-0.182206	0.881354	1.31755	1.49491	FALSE	0.807827	---NA---	173	0			0	0		no IPS match
LCOR_00341.1	-1.43764	0.36917	1.73257	4.69315	FALSE	0.323141	---NA---	107	0			0	0		no IPS match
LCOR_00342.1	-0.696039	0.617265	1.54403	2.5014	FALSE	0.939275	---NA---	109	0			0	0		no IPS match
LCOR_00343.1	-0.661702	0.632132	1.23606	1.95538	FALSE	0.988755	---NA---	97	0			0	0		no IPS match
LCOR_00344.1	-0.631938	0.645309	13.2522	20.5362	FALSE	0.939227	---NA---	242	0			0	0		no IPS match
LCOR_00345.1	-0.440484	0.736887	18.0029	24.4311	FALSE	0.943652	---NA---	81	0			0	0		no IPS match
LCOR_00346.1	-Inf	0	0	0.0234729	FALSE	1	---NA---	430	0			0	0		no IPS match
LCOR_00347.1	-0.393834	0.761105	1.90143	2.49826	FALSE	0.977311	---NA---	165	0			0	0		tmhmm (TMHMM)
LCOR_00348.1	-0.195316	0.873381	1.34389	1.53872	FALSE	0.759923	---NA---	106	0			0	0		no IPS match
LCOR_00349.1	-1.43755	0.369194	7.3683	19.9578	FALSE	0.103574	---NA---	81	0			0	0		no IPS match
LCOR_00350.1	-0.798037	0.575131	8.28691	14.4087	FALSE	0.568302	-domain-containing protein	646	20	1.64814e-83	52.15%	2	C:intracellular; P:signal transduction	0	IPR000198; IPR001060; IPR008936; PTHR23178 (PANTHER)
LCOR_00351.1	-0.75946	0.590717	0.136934	0.23181	FALSE	1	---NA---	245	0			2	F:protein binding; F:phospholipid binding	0	IPR001849; IPR011993; SSF50729 (SUPERFAMILY)
LCOR_00352.1	-0.688552	0.620476	1519.57	2449.04	FALSE	0.830199	eukaryotic translation initiation factor 5a	173	20	3.97781e-91	92.05%	6	F:translation elongation factor activity; P:peptidyl-lysine modification to hypusine; F:ribosome binding; P:positive regulation of translational elongation; P:positive regulation of translational termination; P:translational frameshifting	0	IPR001884; IPR005824; IPR008991; IPR012340; IPR014722; IPR019769; IPR020189; SignalP-NN(euk) (SIGNALP)
LCOR_00353.1	-0.14529	0.904198	34.1272	37.743	FALSE	0.214366	nadph-cytochrome p450 reductase	706	20	0	69.1%	4	F:iron ion binding; F:FMN binding; P:oxidation-reduction process; F:NADPH-hemoprotein reductase activity	EC:1.6.2.4	IPR001094; IPR001433; IPR001709; IPR003097; IPR008254; IPR017927; IPR017938; IPR023173; IPR023208; G3DSA:2.40.30.10 (GENE3D), G3DSA:3.40.50.360 (GENE3D), G3DSA:3.40.50.80 (GENE3D), PTHR19384 (PANTHER), tmhmm (TMHMM), SSF52218 (SUPERFAMILY), SSF52343 (SUPERFAMILY)
LCOR_00354.1	-1.1179	0.460764	1.97156	4.27889	FALSE	0.224809	hypothetical protein RO3G_02721	810	9	2.41951e-170	49.33%	4	F:sequence-specific DNA binding RNA polymerase II transcription factor activity; C:nucleus; F:zinc ion binding; F:DNA binding	0	IPR001138; IPR007219; PTHR31944 (PANTHER), PTHR31944:SF0 (PANTHER), tmhmm (TMHMM)
LCOR_00355.1	-0.169333	0.889254	3.6113	4.06104	FALSE	0.522618	---NA---	378	0			0	0		no IPS match
LCOR_00356.1	-0.583779	0.667214	8.41244	12.6083	FALSE	1	---NA---	66	0			0	0		no IPS match
LCOR_00357.1	0.235776	1.17754	6.77288	5.75172	FALSE	0.228668	---NA---	90	0			0	0		no IPS match
LCOR_00358.1	-0.591139	0.663819	47.6549	71.7889	FALSE	1	arginine biosynthetic enzyme activities	835	20	0	71.55%	7	F:NAD binding; P:oxidation-reduction process; F:N-acetyl-gamma-glutamyl-phosphate reductase activity; P:arginine biosynthetic process; F:acetylglutamate kinase activity; C:mitochondrion; F:protein dimerization activity	EC:1.2.1.38; EC:2.7.2.8	IPR000534; IPR000706; IPR001048; IPR004662; IPR006855; IPR011241; IPR012280; IPR016040; IPR023013; G3DSA:3.30.360.10 (GENE3D), PTHR23342 (PANTHER), SSF51735 (SUPERFAMILY), SSF55347 (SUPERFAMILY)
LCOR_00359.1	-0.219538	0.858841	4.20333	4.89419	FALSE	0.480571	trna pseudouridine synthase a	390	20	4.70092e-108	57.45%	3	P:pseudouridine synthesis; F:RNA binding; F:pseudouridine synthase activity	EC:5.4.99.12	IPR001406; IPR020094; IPR020095; IPR020097; IPR020103
LCOR_00360.1	2.39905	5.27455	43.1728	8.18512	TRUE	1.84478e-13	hypothetical protein RO3G_13519	310	1	2.44589e-69	62.0%	0	0		no IPS match
LCOR_00361.1	1.87334	3.66381	155.658	42.4852	TRUE	6.16071e-13	hypothetical protein RO3G_00935	195	2	2.68281e-40	76.5%	2	F:chromatin binding; F:DNA binding	0	IPR001005; IPR009057; IPR017877; IPR017930; PF13921 (PFAM)
LCOR_00362.1	0.307405	1.23748	38.247	30.9071	TRUE	0.00852343	mrna turnover protein 4 homolog	220	20	8.24866e-119	71.85%	2	C:intracellular; P:ribosome biogenesis	0	IPR001790; PTHR21141 (PANTHER), PTHR21141:SF1 (PANTHER)
LCOR_00363.1	0.0132469	1.00922	32.8035	32.5037	FALSE	0.0718954	protein serine threonine phosphatase 2c	402	20	1.6974e-131	54.2%	2	F:protein serine/threonine phosphatase activity; P:protein dephosphorylation	0	IPR000222; IPR001932; IPR015655; PTHR13832:SF93 (PANTHER)
LCOR_00364.1	1.00193	2.00268	5.77376	2.88301	FALSE	0.0217581	---NA---	90	0			1	F:zinc ion binding	0	IPR001781; PTHR24206 (PANTHER), PTHR24206:SF2 (PANTHER), SSF57716 (SUPERFAMILY)
LCOR_00365.1	-0.891924	0.538895	0.512684	0.951362	FALSE	1	---NA---	78	0			0	0		SignalP-NN(euk) (SIGNALP)
LCOR_00366.1	0.566754	1.48119	0.408019	0.275467	FALSE	0.688767	---NA---	99	0			0	0		no IPS match
LCOR_00367.1	Inf	Inf	0.520234	0	FALSE	0.137162	---NA---	107	0			0	0		no IPS match
LCOR_00368.1	-1.12881	0.457293	3.46431	7.57569	FALSE	0.116855	protein	939	20	0	51.2%	3	P:alginic acid catabolic process; C:periplasmic space; F:poly(beta-D-mannuronate) lyase activity	EC:4.2.2.3	IPR008397; IPR008929; SignalP-NN(euk) (SIGNALP), tmhmm (TMHMM)
LCOR_00369.1	-2.20505	0.216878	1.18621	5.46949	TRUE	0.00258863	---NA---	514	0			0	0		no IPS match
LCOR_00370.1	0.908176	1.87667	670.222	357.133	TRUE	0.000428405	---NA---	403	0			0	0		no IPS match
LCOR_00371.1	-0.554217	0.681027	7.4598	10.9538	FALSE	1	---NA---	341	0			4	F:DNA binding; F:sequence-specific DNA binding transcription factor activity; F:copper ion binding; C:nucleus	0	IPR001083; SM01090 (SMART)
LCOR_00372.1	-0.926294	0.526208	5.17094	9.82679	FALSE	0.515046	vacuolar amino acid transporter 1-like	445	20	1.62067e-157	60.65%	6	P:proteolysis; F:serine-type endopeptidase activity; C:integral to membrane; P:negative regulation of catalytic activity; C:membrane; F:identical protein binding		IPR013057; PTHR22950 (PANTHER), tmhmm (TMHMM)
LCOR_00373.1	-0.861373	0.550429	0.166099	0.301762	FALSE	0.901776	carotene oxygenase	553	7	6.87467e-76	43.57%	1	F:oxidoreductase activity, acting on single donors with incorporation of molecular oxygen, incorporation of two atoms of oxygen		IPR004294
LCOR_00374.1	0.56932	1.48382	271.044	182.666	TRUE	0.00732399	next to brca1 protein 1 protein	729	9	5.19777e-29	41.22%	2	F:protein binding; F:zinc ion binding	0	IPR000270; IPR000433; G3DSA:1.10.8.10 (GENE3D), G3DSA:3.10.20.240 (GENE3D), PTHR20930 (PANTHER), SSF54277 (SUPERFAMILY), SSF57889 (SUPERFAMILY)
LCOR_00375.1	3.15265	8.89285	0.121107	0.0136185	FALSE	0.0590367	trk2p	740	20	2.30997e-117	59.75%	3	P:cation transport; F:cation transmembrane transporter activity; P:transmembrane transport	0	IPR003445; PTHR31064 (PANTHER), PTHR31064:SF0 (PANTHER), SignalP-NN(euk) (SIGNALP), tmhmm (TMHMM)
LCOR_00376.1	0.390418	1.31077	61.1173	46.6269	TRUE	0.003669	hypothetical protein RO3G_02209	1559	2	0	54.0%	2	C:integral to membrane; F:protein binding	0	IPR000731; IPR001680; IPR015943; IPR017986; IPR019775; G3DSA:1.20.1640.10 (GENE3D), PTHR22847 (PANTHER), PF12349 (PFAM), SignalP-NN(euk) (SIGNALP), tmhmm (TMHMM), SSF82866 (SUPERFAMILY)
LCOR_00377.1	1.87621	3.67109	465.279	126.741	TRUE	9.02942e-11	arrestin domain-containing protein	423	20	0	55.15%	5	C:integral to membrane; C:membrane; C:cytosol; P:cellular response to stress; P:regulation of protein ubiquitination		IPR011021; IPR011022; IPR014756; PTHR11188 (PANTHER), PTHR11188:SF1 (PANTHER)
LCOR_00378.1	-0.0279328	0.980825	36.8399	37.5601	FALSE	0.0999671	metal homeostatis protein bsd2	261	20	1.90348e-53	60.4%	0	0		IPR019325; tmhmm (TMHMM)
LCOR_00379.1	-0.750934	0.594219	5.40381	9.09398	FALSE	0.768805	---NA---	171	0			0	0		IPR012340; IPR013970
LCOR_00380.1	-0.0932958	0.937379	19.6625	20.976	FALSE	0.16518	p-loop containing nucleoside triphosphate hydrolase protein	672	20	0	64.1%	1	F:GTP binding	0	IPR006073; IPR027417; G3DSA:3.40.50.300 (GENE3D), PTHR11089 (PANTHER), PTHR11089:SF7 (PANTHER)
LCOR_00381.1	0.0635762	1.04505	21.4851	20.5589	FALSE	0.139413	psp1-domain-containing protein	712	20	3.90773e-57	63.05%	2	F:molecular_function; P:biological_process		IPR007557; PTHR21600 (PANTHER), PTHR21600:SF1 (PANTHER), SignalP-NN(euk) (SIGNALP), tmhmm (TMHMM)
LCOR_00382.1	-0.718	0.607939	12.228	20.1138	FALSE	0.785991	---NA---	234	0			3	P:positive regulation of DNA repair; C:BRCA1-A complex; C:BRISC complex	0	IPR026126; SignalP-NN(euk) (SIGNALP), SSF53300 (SUPERFAMILY)
LCOR_00383.1	-0.927587	0.525737	7.86761	14.9649	FALSE	0.523306	---NA---	130	0			0	0		no IPS match
LCOR_00384.1	-0.0295783	0.979707	5.67864	5.79626	FALSE	0.363788	hypothetical protein RO3G_03309	122	1	3.11843e-26	78.0%	3	F:sequence-specific DNA binding transcription factor activity; F:zinc ion binding; F:sequence-specific DNA binding	0	IPR000679; IPR013088; PTHR10071 (PANTHER), PTHR10071:SF112 (PANTHER), SSF57716 (SUPERFAMILY)
LCOR_00385.1	-0.120715	0.919732	5.98987	6.51262	FALSE	0.457346	---NA---	168	0			0	0		no IPS match
LCOR_00386.1	-1.41874	0.374038	17.6014	47.0578	TRUE	0.00725308	atp-dependent peptidase	738	20	0	72.5%	6	F:metalloendopeptidase activity; F:ATP binding; P:proteolysis; F:nucleoside-triphosphatase activity; C:membrane; P:protein catabolic process	EC:3.4.24.0; EC:3.6.1.15	IPR000642; IPR003593; IPR003959; IPR005936; IPR027417; G3DSA:1.10.8.60 (GENE3D), G3DSA:3.40.50.300 (GENE3D), PTHR23076 (PANTHER), PTHR23076:SF10 (PANTHER), tmhmm (TMHMM), SSF140990 (SUPERFAMILY)
LCOR_00387.1	-0.681163	0.623663	0.161451	0.258875	FALSE	1	---NA---	264	0			0	0		G3DSA:1.20.120.20 (GENE3D), tmhmm (TMHMM)
LCOR_00388.1	-1.20928	0.432483	10.326	23.876	FALSE	0.0381284	tbc domain-containing protein kinase-like protein isoform 2	1002	20	2.48292e-105	62.5%	6	F:Rab GTPase activator activity; C:intracellular; P:regulation of Rab GTPase activity; F:ATP binding; P:protein phosphorylation; F:protein tyrosine kinase activity	EC:2.7.10.0	IPR000195; IPR000719; IPR001763; IPR002290; IPR011009; IPR020635; G3DSA:1.10.510.10 (GENE3D), G3DSA:1.10.8.270 (GENE3D), G3DSA:3.30.200.20 (GENE3D), PTHR22957 (PANTHER), PTHR22957:SF22 (PANTHER)
LCOR_00389.1	-Inf	0	0	0.0556627	FALSE	0.698654	iron zinc purple acid phosphatase-like	464	20	7.56826e-120	51.3%	2	F:acid phosphatase activity; F:metal ion binding	EC:3.1.3.2	IPR004843; IPR008963; IPR015914; G3DSA:3.60.21.10 (GENE3D), PTHR22953 (PANTHER), PTHR22953:SF0 (PANTHER), SignalP-NN(euk) (SIGNALP), SSF56300 (SUPERFAMILY)
LCOR_00390.1	0.289106	1.22188	50.647	41.4499	FALSE	0.0106314	vacuole membrane protein 1	422	20	4.0303e-79	56.25%	4	C:endoplasmic reticulum; C:endoplasmic reticulum-Golgi intermediate compartment membrane; C:integral to membrane; C:membrane		IPR015414; PTHR10281 (PANTHER), PTHR10281:SF1 (PANTHER), tmhmm (TMHMM)
LCOR_00391.1	1.16127	2.23655	292.869	130.947	TRUE	7.59364e-08	---NA---	96	0			0	0		no IPS match
LCOR_00392.1	0.352829	1.27706	11.8922	9.31217	FALSE	0.0170675	transcription factor iiia	379	20	7.59788e-65	51.25%	2	F:zinc ion binding; F:nucleic acid binding	0	IPR007087; IPR013087; IPR015880; PTHR11389 (PANTHER), PF13465 (PFAM), PF13894 (PFAM), SSF57667 (SUPERFAMILY)
LCOR_00393.1	0.119538	1.08639	87.4155	80.4644	FALSE	0.0369639	protein serine threonine kinase	301	20	1.4965e-162	84.75%	4	F:ATP binding; P:protein phosphorylation; F:protein serine/threonine kinase activity; F:protein tyrosine kinase activity	EC:2.7.11.0; EC:2.7.10.0	IPR000719; IPR002290; IPR008271; IPR011009; IPR017441; IPR020635; G3DSA:1.10.510.10 (GENE3D), G3DSA:3.30.200.20 (GENE3D), PTHR24056 (PANTHER)
LCOR_00394.1	-1.28473	0.410447	1.06645	2.59826	FALSE	0.214415	---NA---	528	0			4	F:zinc ion binding; F:protein binding; F:ubiquitin-protein ligase activity; P:protein ubiquitination	EC:6.3.2.19	IPR001293; IPR001841; IPR008974; IPR013083; IPR013323; PTHR10131 (PANTHER), PF13923 (PFAM), SSF57850 (SUPERFAMILY)
LCOR_00395.1	-1.29901	0.406405	2.36607	5.82195	FALSE	0.364102	---NA---	183	0			0	0		G3DSA:1.20.120.20 (GENE3D)
LCOR_00396.1	-1.21457	0.430901	5.33967	12.3919	FALSE	0.130487	---NA---	290	0			1	F:protein binding	0	IPR001810; G3DSA:1.20.1280.50 (GENE3D)
LCOR_00397.1	1.33849	2.52886	3.75035	1.48302	FALSE	0.0368426	---NA---	66	0			0	0		no IPS match
LCOR_00398.1	-0.635334	0.643792	374.409	581.569	FALSE	0.919059	plasma-membrane proton-e	986	20	0	78.15%	7	P:cation transport; C:integral to membrane; F:cation-transporting ATPase activity; P:ATP catabolic process; P:ATP biosynthetic process; F:nucleotide binding; F:metal ion binding	0	IPR001757; IPR004014; IPR006534; IPR008250; IPR018303; IPR023214; IPR023298; IPR023299; PTHR24093:SF127 (PANTHER), tmhmm (TMHMM), SSF81653 (SUPERFAMILY), SSF81665 (SUPERFAMILY)
LCOR_00399.1	-0.736253	0.600296	2.97729	4.9597	FALSE	0.800693	hypothetical protein RO3G_01818	673	1	2.63575e-59	49.0%	1	F:RNA binding	0	IPR004088; G3DSA:3.30.1370.10 (GENE3D), SignalP-NN(euk) (SIGNALP), SSF54791 (SUPERFAMILY)
LCOR_00400.1	-0.640209	0.64162	8.0033	12.4736	FALSE	0.893583	riken cdna family protein	389	19	3.04407e-79	65.42%	0	0		IPR019351; PTHR22876 (PANTHER)
LCOR_00401.1	-0.708348	0.612021	2.53674	4.14486	FALSE	0.723817	guanine nucleotide exchange factor lte1	1361	20	2.2589e-114	51.95%	3	F:guanyl-nucleotide exchange factor activity; C:intracellular; P:regulation of small GTPase mediated signal transduction	0	IPR000651; IPR001895; IPR008937; IPR023578; G3DSA:1.20.870.10 (GENE3D), PTHR23113:SF27 (PANTHER)
LCOR_00402.1	-0.322292	0.799798	58.1837	72.748	FALSE	0.612464	f-box and wd repeat-containing protein	593	20	0	65.8%	1	F:protein binding	0	IPR001680; IPR001810; IPR015943; IPR017986; IPR019775; IPR020472; G3DSA:1.20.1280.50 (GENE3D), PTHR22844 (PANTHER), PTHR22844:SF75 (PANTHER), PF12937 (PFAM)
LCOR_00403.1	2.03148	4.08823	31.9767	7.82166	TRUE	2.67037e-09	syntaxin-like protein	349	20	1.87803e-69	58.6%	3	F:protein binding; C:membrane; P:vesicle-mediated transport	0	IPR000727; IPR006011; IPR010989; G3DSA:1.20.58.70 (GENE3D), PTHR19957 (PANTHER), PTHR19957:SF37 (PANTHER), tmhmm (TMHMM)
LCOR_00404.1	-0.018711	0.987114	20.6856	20.9556	FALSE	0.13513	rho guanyl nucleotide exchange factor	918	20	1.97434e-125	60.4%	5	F:Rho guanyl-nucleotide exchange factor activity; C:intracellular; P:regulation of Rho protein signal transduction; F:protein binding; F:phospholipid binding	0	IPR000219; IPR000591; IPR001849; IPR011991; IPR011993; PTHR12673 (PANTHER), PTHR12673:SF16 (PANTHER), SSF46785 (SUPERFAMILY), SSF50729 (SUPERFAMILY)
LCOR_00405.1	-1.62317	0.324621	6.68545	20.5946	TRUE	0.00177737	cleft lip and palate transmembrane 1	700	20	0	59.85%	0	0		IPR008429; tmhmm (TMHMM)
LCOR_00406.1	-1.0208	0.492842	7.78274	15.7916	FALSE	0.192016	hypothetical protein RO3G_03632	640	1	2.47683e-42	75.0%	6	F:protein binding; F:zinc ion binding; F:nucleic acid binding; C:ubiquitin ligase complex; F:ubiquitin-protein ligase activity; P:protein ubiquitination	EC:6.3.2.19	IPR001841; IPR001878; IPR003613; IPR013083; PTHR15439 (PANTHER), PTHR15439:SF0 (PANTHER), PF13923 (PFAM), SSF57850 (SUPERFAMILY)
LCOR_00407.1	0.180187	1.13303	7.48055	6.60225	FALSE	0.232988	---NA---	88	0			0	0		no IPS match
LCOR_00408.1	-0.551044	0.682526	150.672	220.757	FALSE	1	casein kinase i	403	20	0	97.0%	4	F:ATP binding; P:protein phosphorylation; F:protein serine/threonine kinase activity; F:protein tyrosine kinase activity	EC:2.7.11.0; EC:2.7.10.0	IPR000719; IPR002290; IPR008271; IPR011009; IPR017441; IPR020635; G3DSA:1.10.510.10 (GENE3D), G3DSA:3.30.200.20 (GENE3D), PTHR11909 (PANTHER), PTHR11909:SF18 (PANTHER)
LCOR_00410.1	-2.95513	0.128948	3.24755	25.1849	TRUE	2.43734e-09	hypothetical protein RO3G_06864	622	20	0	56.2%	2	F:siderophore transmembrane transporter activity; P:siderophore biosynthetic process	0	IPR007310; IPR022770
LCOR_00411.1	-1.34854	0.392689	406.759	1035.83	FALSE	0.0212656	14-3-3 protein	253	20	1.9128e-159	89.7%	1	F:protein domain specific binding	0	IPR000308; IPR023409; IPR023410; PTHR18860:SF0 (PANTHER)
LCOR_00412.1	-1.19713	0.436143	3.77508	8.65561	FALSE	0.11334	camp independent regulatory protein	537	20	2.47106e-93	66.65%	0	0		IPR018608
LCOR_00413.1	-0.441655	0.73629	4.65663	6.32446	FALSE	0.898064	---NA---	315	0			2	F:zinc ion binding; F:nucleic acid binding	0	IPR007087; IPR013087; IPR015880; PTHR23057 (PANTHER), SSF57667 (SUPERFAMILY)
LCOR_00414.1	-0.658564	0.633509	1.17414	1.85339	FALSE	0.989462	hypothetical protein RO3G_09432	301	1	1.19847e-29	51.0%	2	F:signal transducer activity; P:signal transduction	0	IPR000014; G3DSA:3.30.450.20 (GENE3D)
LCOR_00415.1	-1.09013	0.46972	13.0282	27.7361	FALSE	0.158679	hypothetical protein RO3G_08365	271	2	1.21041e-73	67.5%	1	F:nucleotide binding	0	IPR012677; PF14259 (PFAM), SSF54928 (SUPERFAMILY)
LCOR_00416.1	-1.73488	0.300435	33.6895	112.136	TRUE	0.00054928	proteasome regulatory particle subunit	386	20	0	74.1%	1	F:protein binding	0	IPR000717; PTHR10539 (PANTHER), SSF46785 (SUPERFAMILY)
LCOR_00417.1	0.863971	1.82004	8371.4	4599.57	TRUE	8.46515e-05	chitin deacetylase	415	20	0	78.4%	2	P:carbohydrate metabolic process; F:catalytic activity	0	IPR002509; IPR011330; PTHR10587 (PANTHER), PTHR10587:SF15 (PANTHER), SignalP-NN(euk) (SIGNALP)
LCOR_00418.1	0.806988	1.74955	23.5077	13.4364	TRUE	4.16449e-05	queuine trna-ribosyltransferase subunit qtrtd1-like	395	20	1.06182e-91	51.3%	2	F:queuine tRNA-ribosyltransferase activity; P:queuosine biosynthetic process	EC:2.4.2.29	IPR002616; PTHR11962:SF0 (PANTHER)
LCOR_00419.1	-0.940812	0.52094	4.99143	9.5816	FALSE	0.410888	dihydroorotase	354	20	0	71.4%	2	F:dihydroorotase activity; P:pyrimidine nucleobase biosynthetic process	EC:3.5.2.3	IPR002195; IPR004721; IPR006992; G3DSA:3.20.20.140 (GENE3D), PTHR32531 (PANTHER), PTHR32531:SF0 (PANTHER), SSF51556 (SUPERFAMILY)
LCOR_00421.1	-1.91097	0.265913	34.133	128.361	TRUE	0.00054611	cyclophilin	177	20	7.7466e-100	80.6%	2	F:peptidyl-prolyl cis-trans isomerase activity; P:protein folding	EC:5.2.1.8	IPR002130; IPR020892; IPR024936; G3DSA:2.40.100.10 (GENE3D), PTHR11071 (PANTHER)
LCOR_00423.1	-0.310502	0.806361	6.54121	8.11201	FALSE	0.557804	hypothetical protein RO3G_08575	543	20	1.91683e-173	53.35%	0	0		IPR002885; PTHR24015 (PANTHER), PTHR24015:SF0 (PANTHER), SignalP-NN(euk) (SIGNALP)
LCOR_00424.1	1.07497	2.10668	52.3639	24.8561	TRUE	2.79107e-06	transcriptional regulator prz1	365	11	4.57486e-45	76.36%	2	F:zinc ion binding; F:nucleic acid binding	0	IPR007087; IPR013087; IPR015880; PTHR11389 (PANTHER), PF13465 (PFAM), SSF57667 (SUPERFAMILY)
LCOR_00425.1	-1.02787	0.490433	34.5696	70.4879	FALSE	0.197749	---NA---	154	0			0	0		no IPS match
LCOR_00426.1	-0.042545	0.970941	143.103	147.386	FALSE	0.14181	alpha-arabinofuranosidase ii	573	3	1.85708e-121	54.67%	1	F:hydrolase activity	0	IPR013831; SignalP-NN(euk) (SIGNALP), tmhmm (TMHMM), SSF52266 (SUPERFAMILY)
LCOR_00427.1	-1.07232	0.475554	7.80388	16.4101	FALSE	0.193554	related to heat shock factor protein 4	359	20	2.93064e-84	66.55%	3	F:sequence-specific DNA binding transcription factor activity; C:nucleus; F:sequence-specific DNA binding	0	IPR000232; IPR011991; PTHR10015 (PANTHER), SSF46785 (SUPERFAMILY)
LCOR_00428.1	0.93804	1.91592	24.6474	12.8645	TRUE	0.000335986	transaldolase	321	20	0	80.75%	3	F:sedoheptulose-7-phosphate:D-glyceraldehyde-3-phosphate glyceronetransferase activity; C:cytoplasm; P:pentose-phosphate shunt	EC:2.2.1.2	IPR001585; IPR004730; IPR013785; IPR018225; SSF51569 (SUPERFAMILY)
LCOR_00429.1	-0.963357	0.512862	0.677305	1.32064	FALSE	0.759998	acyl-coenzyme a thioesterase 8	349	20	4.99463e-101	54.8%	2	P:acyl-CoA metabolic process; F:acyl-CoA hydrolase activity	EC:3.1.2.20	IPR003703; G3DSA:3.10.129.10 (GENE3D), PF13622 (PFAM), SSF54637 (SUPERFAMILY)
LCOR_00430.1	-0.384047	0.766285	41.2911	53.8848	FALSE	0.680579	ras protein	205	20	6.38294e-103	87.2%	8	F:GTP binding; P:small GTPase mediated signal transduction; F:GTPase activity; P:GTP catabolic process; P:intracellular protein transport; P:nucleocytoplasmic transport; C:intracellular; C:membrane	0	IPR001806; IPR002041; IPR003578; IPR003579; IPR005225; IPR020849; IPR027417; G3DSA:3.40.50.300 (GENE3D), PTHR24070:SF51 (PANTHER)
LCOR_00431.1	-1.26506	0.416081	1.03582	2.48947	FALSE	0.522956	ras-related protein rap-1b precursor	184	20	6.36127e-88	86.3%	7	F:GTP binding; P:small GTPase mediated signal transduction; C:intracellular; P:protein transport; F:GTPase activity; P:GTP catabolic process; C:membrane	0	IPR001806; IPR003578; IPR003579; IPR005225; IPR020849; IPR027417; G3DSA:3.40.50.300 (GENE3D), PTHR24070:SF0 (PANTHER)
LCOR_00432.1	-0.524582	0.69516	27.2674	39.2246	FALSE	0.975689	cytoskeleton assembly control protein	1256	20	9.87926e-69	59.05%	3	F:cytoskeletal protein binding; F:identical protein binding; F:ubiquitin binding	0	IPR001452; IPR007131; PD936484 (PRODOM), G3DSA:2.30.30.40 (GENE3D), PTHR11216 (PANTHER), PTHR11216:SF7 (PANTHER)
LCOR_00433.1	0.837788	1.78731	0.771169	0.43147	FALSE	0.0246448	endoglucanase e-4-like	668	20	0	59.15%	2	P:carbohydrate metabolic process; F:catalytic activity	0	IPR001701; IPR008928; IPR012341; IPR018221; PTHR22298 (PANTHER), PTHR22298:SF3 (PANTHER), SignalP-NN(euk) (SIGNALP), tmhmm (TMHMM)
LCOR_00434.1	0.203159	1.15122	231.853	201.399	FALSE	0.0262597	hypothetical protein RO3G_00343	338	1	1.3395e-31	68.0%	0	0		no IPS match
LCOR_00435.1	-1.21936	0.429473	31.5881	73.5509	FALSE	0.0375321	translation initiation factor 4b	296	20	1.44398e-64	60.4%	2	F:nucleic acid binding; F:nucleotide binding	0	IPR000504; IPR010433; IPR012677; PTHR23236 (PANTHER), PTHR23236:SF2 (PANTHER), PF14259 (PFAM), SSF54928 (SUPERFAMILY)
LCOR_00436.1	0.868473	1.82573	7.73823	4.23843	TRUE	0.00253551	glycosyltransferase family 62 protein	362	20	1.08148e-135	66.55%	1	F:transferase activity		IPR005109; PTHR31041 (PANTHER), PTHR31041:SF0 (PANTHER), SignalP-NN(euk) (SIGNALP), tmhmm (TMHMM), SSF53448 (SUPERFAMILY)
LCOR_00437.1	-0.468737	0.722597	61.1825	84.6703	FALSE	0.81998	glutamine amidotransferase subunit pdxt	217	20	2.15065e-102	66.45%	4	F:transferase activity; P:glutamine metabolic process; P:pyridoxal phosphate biosynthetic process; P:glutamine catabolic process		IPR002161; IPR021196; G3DSA:3.40.50.880 (GENE3D), PTHR31559 (PANTHER), PTHR31559:SF0 (PANTHER), SSF52317 (SUPERFAMILY)
LCOR_00439.1	-0.0245851	0.983103	6.59654	6.70992	FALSE	0.173937	amp-dependent synthetase ligase	549	20	0	62.95%	2	F:catalytic activity; P:metabolic process	0	IPR000873; IPR020845; IPR025110; G3DSA:2.30.38.10 (GENE3D), G3DSA:3.30.300.30 (GENE3D), G3DSA:3.40.50.980 (GENE3D), PTHR24096 (PANTHER), PTHR24096:SF16 (PANTHER), SSF56801 (SUPERFAMILY)
LCOR_00440.1	0.136287	1.09907	7.86915	7.15981	FALSE	0.0457489	hypothetical protein RO3G_11431	965	8	6.10723e-142	47.88%	0	0		IPR018820; IPR018823; IPR023244; PF13515 (PFAM), tmhmm (TMHMM)
LCOR_00441.1	-0.646449	0.638851	0.363375	0.568795	FALSE	0.986022	hypothetical protein RO3G_11431	878	11	2.39696e-147	49.18%	1	P:response to aluminum ion		IPR018820; PF13515 (PFAM), tmhmm (TMHMM)
LCOR_00442.1	-0.19839	0.871522	72.046	82.6669	FALSE	0.322276	cysteine synthase	359	20	0	87.05%	1	P:cysteine biosynthetic process from serine	0	IPR001216; IPR001926; G3DSA:3.40.50.1100 (GENE3D), PTHR10314 (PANTHER), PTHR10314:SF32 (PANTHER)
LCOR_00443.1	-1.36681	0.387748	17.1458	44.2189	TRUE	0.00984149	integral membrane protein	551	20	2.39415e-129	59.1%	1	C:integral to membrane	0	IPR009637; PTHR21229:SF1 (PANTHER), SignalP-NN(euk) (SIGNALP), tmhmm (TMHMM)
LCOR_00444.1	-0.586549	0.665934	12.7666	19.1709	FALSE	1	---NA---	378	0			1	F:protein binding	0	IPR001810; G3DSA:1.20.1280.50 (GENE3D)
LCOR_00445.1	-1.24878	0.420805	29.2715	69.5608	FALSE	0.0404342	mov34-domain-containing protein	296	20	1.59778e-154	66.45%	1	F:protein binding	0	IPR000555; IPR024969; PTHR10540 (PANTHER), PTHR10540:SF6 (PANTHER)
LCOR_00446.1	-1.68184	0.311684	17.4576	56.0105	TRUE	0.000582125	26s protease regulatory subunit 6a	1307	20	0	90.7%	4	F:nucleoside-triphosphatase activity; F:ATP binding; C:cytoplasm; P:protein catabolic process	EC:3.6.1.15	IPR003593; IPR003959; IPR003960; IPR005937; IPR018820; IPR018823; IPR023244; IPR027417; G3DSA:1.10.8.60 (GENE3D), G3DSA:3.40.50.300 (GENE3D), PTHR23073 (PANTHER), PTHR23073:SF7 (PANTHER), tmhmm (TMHMM)
LCOR_00447.1	-0.86497	0.549058	42.7527	77.8655	FALSE	0.388991	signal recognition particle 54 kda protein	518	20	0	79.95%	5	F:GTP binding; P:SRP-dependent cotranslational protein targeting to membrane; F:7S RNA binding; C:signal recognition particle; F:GTPase activity	0	IPR000897; IPR003593; IPR004125; IPR006325; IPR013822; IPR027417; G3DSA:1.20.120.140 (GENE3D), G3DSA:3.40.50.300 (GENE3D), PTHR11564 (PANTHER), PTHR11564:SF5 (PANTHER)
LCOR_00448.1	-0.0654865	0.955623	0.0382776	0.0400551	FALSE	1	molecular chaperone	235	6	1.02964e-30	54.0%	3	F:unfolded protein binding; P:protein folding; F:heat shock protein binding		IPR001623; IPR018253; PTHR24078 (PANTHER)
LCOR_00449.1	-0.389187	0.76356	14.1901	18.5841	FALSE	0.870068	---NA---	122	0			0	0		no IPS match
LCOR_00451.1	-0.405	0.755236	73.3602	97.1355	FALSE	0.770993	---NA---	134	0			0	0		no IPS match
LCOR_00452.1	-0.444605	0.734786	27.3401	37.2082	FALSE	0.780163	fatty aldehyde dehydrogenase	504	20	0	67.25%	3	F:aldehyde dehydrogenase [NAD(P)+] activity; P:cellular aldehyde metabolic process; P:oxidation-reduction process	EC:1.2.1.5	IPR012394; IPR015590; IPR016160; IPR016161; IPR016162; IPR016163; PTHR11699 (PANTHER)
LCOR_00453.1	-1.92608	0.263142	8.14843	30.9659	TRUE	0.000584344	---NA---	230	0			0	0		SignalP-NN(euk) (SIGNALP)
LCOR_00454.1	-1.15081	0.450373	0.937262	2.08108	FALSE	0.355368	voltage-gated potassium channel	554	20	6.49234e-108	70.6%	4	F:voltage-gated potassium channel activity; P:potassium ion transport; C:voltage-gated potassium channel complex; P:transmembrane transport	0	IPR003091; IPR005821; G3DSA:1.10.287.70 (GENE3D), PTHR11537:SF14 (PANTHER), tmhmm (TMHMM), SSF81324 (SUPERFAMILY)
LCOR_00455.1	-1.25151	0.420009	1.85782	4.42328	FALSE	0.126013	hypothetical protein RO3G_09894	942	3	1.63185e-46	67.33%	0	0		no IPS match
LCOR_00456.1	-0.783971	0.580766	4.6081	7.93453	FALSE	0.583274	---NA---	683	0			4	F:protein binding; C:anaphase-promoting complex; P:regulation of mitotic metaphase/anaphase transition; P:anaphase-promoting complex-dependent proteasomal ubiquitin-dependent protein catabolic process	0	IPR001680; IPR015943; IPR017986; IPR024789; IPR024790; IPR024977
LCOR_00457.1	-2.15906	0.223903	9.10731	40.6753	TRUE	1.57573e-05	er lumen protein retaining receptor	214	20	3.90721e-104	82.25%	3	P:protein retention in ER lumen; C:integral to membrane; F:ER retention sequence binding	0	IPR000133; SignalP-NN(euk) (SIGNALP), tmhmm (TMHMM)
LCOR_00458.1	-0.551489	0.682316	33.2721	48.7634	FALSE	0.998547	uncharacterized conserved protein	393	5	6.39076e-81	62.0%	0	0		IPR018612; PTHR22908 (PANTHER), PTHR22908:SF4 (PANTHER), SignalP-NN(euk) (SIGNALP)
LCOR_00459.1	1.10556	2.15183	1363.86	633.814	TRUE	7.31167e-07	sentrin-specific protease 1-like	1278	20	9.84488e-56	63.15%	3	P:proteolysis; F:cysteine-type peptidase activity; F:protein dimerization activity	0	IPR003653; IPR011598; G3DSA:3.30.310.130 (GENE3D), PTHR12606 (PANTHER), PTHR12606:SF0 (PANTHER), SSF54001 (SUPERFAMILY)
LCOR_00460.1	1.42915	2.69288	593.967	220.569	TRUE	4.46258e-08	hypothetical protein RO3G_10970	442	7	2.57455e-114	48.29%	0	0		IPR019378; SignalP-NN(euk) (SIGNALP), tmhmm (TMHMM)
LCOR_00461.1	0.376539	1.29822	52.8082	40.6772	TRUE	0.00841815	rho gtpase activator	1137	20	1.52984e-83	49.9%	3	C:intracellular; P:signal transduction; F:zinc ion binding	0	IPR000198; IPR001781; IPR008936; PTHR24215 (PANTHER), PTHR24215:SF10 (PANTHER), SSF57716 (SUPERFAMILY)
LCOR_00462.1	1.67716	3.19797	64.5323	20.1791	TRUE	4.72094e-11	aaa family protein	930	20	6.37363e-58	49.5%	2	F:nucleoside-triphosphatase activity; F:ATP binding	EC:3.6.1.15	IPR003593; IPR003959; IPR027417; G3DSA:3.40.50.300 (GENE3D), PTHR23389 (PANTHER)
LCOR_00463.1	-1.36108	0.389291	175.792	451.569	FALSE	0.0229152	atp synthase subunit 4	240	20	1.39053e-123	73.9%	2	F:hydrogen ion transmembrane transporter activity; P:ATP synthesis coupled proton transport	0	IPR008688; IPR013837; SignalP-NN(euk) (SIGNALP)
LCOR_00466.1	-1.24655	0.421455	2.73877	6.49836	FALSE	0.0569517	chromatin remodeling complex subunit	1758	20	0	55.9%	5	F:DNA binding; F:ATP binding; F:helicase activity; F:protein binding; F:zinc ion binding	0	IPR000330; IPR000953; IPR001650; IPR001965; IPR014001; IPR016197; IPR019786; IPR023780; IPR027417; G3DSA:2.40.50.40 (GENE3D), G3DSA:3.40.50.300 (GENE3D), PTHR10799 (PANTHER), PTHR10799:SF54 (PANTHER)
LCOR_00468.1	-1.28955	0.409079	8.96318	21.9107	FALSE	0.061283	hypothetical protein RO3G_13018	272	1	7.9306e-49	58.0%	3	F:FMN binding; F:oxidoreductase activity; P:oxidation-reduction process	0	IPR012349
LCOR_00470.1	0.0593198	1.04197	1.86107	1.7861	FALSE	0.476253	hypothetical protein RO3G_13846	204	2	4.46252e-42	73.5%	0	0		no IPS match
LCOR_00471.1	0.16857	1.12394	0.209657	0.186537	FALSE	1	---NA---	96	0			0	0		no IPS match
LCOR_00472.1	-0.873885	0.545675	59.0779	108.266	FALSE	0.384423	dna-directed rna polymerases and iii subunit rpabc2-like	142	20	8.92222e-40	81.6%	3	F:DNA binding; F:DNA-directed RNA polymerase activity; C:RNA polymerase complex	EC:2.7.7.6	IPR006110; IPR006111; IPR012293; IPR020708; PTHR10773:SF8 (PANTHER)
LCOR_00474.1	-0.753913	0.592993	9.60107	16.1909	FALSE	0.602745	cell division control protein	699	20	1.17201e-42	51.5%	1	F:protein binding	0	IPR001060; IPR001452; G3DSA:2.30.30.40 (GENE3D), PTHR23065 (PANTHER)
LCOR_00476.1	-0.689099	0.620241	24.7186	39.8532	FALSE	0.829761	mmp37-domain-containing protein	433	20	1.47827e-148	64.7%	0	0		IPR015222; PTHR13619:SF0 (PANTHER)
LCOR_00477.1	-1.15156	0.450137	37.3418	82.9565	FALSE	0.0809142	spfh domain band 7 family protein	275	20	4.2166e-162	88.05%	1	C:membrane	0	IPR000163; IPR001107; SignalP-NN(euk) (SIGNALP), SSF117892 (SUPERFAMILY)
LCOR_00478.1	-0.419703	0.747579	15.4732	20.6978	FALSE	0.767164	serine threonine-protein kinase	628	20	1.19591e-151	67.05%	4	F:ATP binding; P:protein phosphorylation; F:protein serine/threonine kinase activity; F:protein tyrosine kinase activity	EC:2.7.11.0; EC:2.7.10.0	IPR000719; IPR002290; IPR008271; IPR011009; IPR017441; IPR020635; IPR020636; G3DSA:1.10.510.10 (GENE3D), G3DSA:3.30.200.20 (GENE3D), PTHR24347:SF58 (PANTHER), SignalP-NN(euk) (SIGNALP)
LCOR_00479.1	0.68179	1.60413	17.8169	11.1069	FALSE	0.0156492	---NA---	79	0			0	0		no IPS match
LCOR_00480.1	-0.271486	0.828466	170.254	205.505	FALSE	0.442547	---NA---	73	0			0	0		IPR007513; IPR026939; PF12907 (PFAM), SSF118359 (SUPERFAMILY)
LCOR_00481.1	-0.463825	0.725061	1784.92	2461.76	FALSE	0.835407	60s ribosomal protein l3	388	20	0	87.4%	3	F:structural constituent of ribosome; C:ribosome; P:translation	0	IPR000597; IPR009000; IPR019926; G3DSA:2.40.30.10 (GENE3D), G3DSA:3.30.1430.10 (GENE3D), PTHR11363 (PANTHER)
LCOR_00482.1	-1.08993	0.469785	18.0102	38.3371	FALSE	0.138974	protein required for assembly of ubiquinol cytochrome-c reductase complex (cytochrome bc1 complex)	255	20	1.48509e-48	59.25%	0	0		IPR007129; IPR021150
LCOR_00484.1	-Inf	0	0	0.0378158	FALSE	1	---NA---	227	0			0	0		IPR009571; SignalP-NN(euk) (SIGNALP), tmhmm (TMHMM)
LCOR_00485.1	-1.10003	0.466506	44.3672	95.1053	FALSE	0.0981174	ptk9 protein tyrosine kinase 9	364	20	2.98866e-134	54.2%	2	F:actin binding; C:intracellular	0	IPR002108; G3DSA:3.40.20.10 (GENE3D), PTHR13759 (PANTHER), PTHR13759:SF0 (PANTHER), SSF55753 (SUPERFAMILY)
LCOR_00486.1	-1.33511	0.396362	9.71999	24.523	FALSE	0.0403144	mt-a70 family protein	271	20	1.16765e-128	76.95%	4	F:nucleic acid binding; F:methyltransferase activity; P:methylation; P:nucleobase-containing compound metabolic process	EC:2.1.1.0	IPR002052; IPR007757; G3DSA:3.40.50.150 (GENE3D), PTHR12829 (PANTHER), PTHR12829:SF0 (PANTHER), SSF53335 (SUPERFAMILY)
LCOR_00487.1	-0.366213	0.775816	9.83124	12.6721	FALSE	0.894822	superoxide dismutase (cu-zn)	161	20	1.14757e-46	66.35%	4	P:superoxide metabolic process; F:metal ion binding; P:oxidation-reduction process; F:superoxide dismutase activity	EC:1.15.1.1	IPR001424; IPR018152; IPR024134; SignalP-NN(euk) (SIGNALP)
LCOR_00488.1	0.444571	1.36091	161.932	118.988	TRUE	0.00659518	rhomboid family membrane protein	521	20	9.90153e-127	58.0%	3	F:serine-type endopeptidase activity; P:proteolysis; C:integral to membrane	EC:3.4.21.0	IPR002610; IPR022764; PTHR22936:SF0 (PANTHER), tmhmm (TMHMM), SSF144091 (SUPERFAMILY)
LCOR_00489.1	-0.581991	0.668041	0.0275538	0.0412456	FALSE	1	short-chain dehydrogenase, putative	734	20	1.31262e-94	47.65%	3	F:DNA binding; P:DNA recombination; P:DNA integration	0	IPR011010; IPR013762; IPR022210
LCOR_00490.1	-0.229501	0.85293	3.1054	3.64086	FALSE	0.826047	---NA---	73	0			0	0		no IPS match
LCOR_00491.1	-1.57153	0.336452	135.88	403.861	TRUE	0.00838885	related to nadh-ubiquinone oxidoreductase mlrq subunit	87	6	8.66652e-45	74.5%	0	0		IPR010530; PTHR14256:SF0 (PANTHER), tmhmm (TMHMM)
LCOR_00492.1	-0.673656	0.626916	24.3573	38.8526	FALSE	0.793582	wd40 repeat-like protein	755	20	2.01473e-152	61.85%	1	F:protein binding	0	IPR001680; IPR013258; IPR015943; IPR017986; IPR019775; IPR020472; PTHR15653 (PANTHER), PTHR15653:SF0 (PANTHER)
LCOR_00493.1	-1.17251	0.443649	91.1252	205.399	FALSE	0.0722495	inorganic phosphate transporter	196	20	3.30681e-49	62.2%	0	0		IPR019263; SignalP-NN(euk) (SIGNALP), tmhmm (TMHMM)
LCOR_00494.1	-0.326918	0.797238	0.0872267	0.109411	FALSE	1	---NA---	257	0			0	0		SignalP-NN(euk) (SIGNALP), tmhmm (TMHMM)
LCOR_00495.1	-0.71395	0.609649	0.297796	0.488472	FALSE	0.975958	dead deah box dna helicase	1280	20	0	52.35%	3	F:nucleic acid binding; F:ATP binding; F:ATP-dependent helicase activity	0	IPR004179; IPR011545; IPR014001; IPR027417; G3DSA:1.10.3380.10 (GENE3D), G3DSA:3.40.50.300 (GENE3D), PTHR11752 (PANTHER), PTHR11752:SF26 (PANTHER)
LCOR_00496.1	-0.0219031	0.984933	15.8354	16.0777	FALSE	0.17434	cysteine proteinase	229	7	1.02958e-37	55.14%	2	P:proteolysis; F:cysteine-type peptidase activity	0	IPR003653; G3DSA:3.30.310.130 (GENE3D), PTHR22875 (PANTHER), SSF54001 (SUPERFAMILY)
LCOR_00497.1	Inf	Inf	0.172133	0	FALSE	0.698654	---NA---	117	0			0	0		SignalP-NN(euk) (SIGNALP), tmhmm (TMHMM)
LCOR_00498.1	-0.151089	0.90057	310.615	344.909	FALSE	0.247359	dihydrolipoamide succinyltransferase	445	20	2.14014e-157	81.05%	3	F:dihydrolipoyllysine-residue succinyltransferase activity; P:tricarboxylic acid cycle; C:oxoglutarate dehydrogenase complex	EC:2.3.1.61	IPR000089; IPR001078; IPR003016; IPR006255; IPR011053; IPR023213; G3DSA:2.40.50.100 (GENE3D), PTHR23151 (PANTHER), PTHR23151:SF8 (PANTHER), SSF52777 (SUPERFAMILY)
LCOR_00499.1	-0.689365	0.620127	14.8589	23.9611	FALSE	0.767488	hypothetical protein RO3G_16467	323	2	2.69976e-41	53.0%	1	P:lipid biosynthetic process	0	IPR003333; G3DSA:3.40.50.150 (GENE3D), PTHR10108 (PANTHER), SignalP-NN(euk) (SIGNALP), tmhmm (TMHMM), SSF53335 (SUPERFAMILY)
LCOR_00500.1	-0.677557	0.625223	1.14143	1.82564	FALSE	0.830199	arm repeat-containing protein	897	20	0	62.95%	4	F:DNA binding; F:RNA binding; F:protein binding; P:RNA metabolic process	0	IPR003890; IPR003891; IPR016021; IPR016024; PTHR18034 (PANTHER), PTHR18034:SF4 (PANTHER)
LCOR_00501.1	Inf	Inf	0.0485034	0	FALSE	1	---NA---	184	0			0	0		IPR013734
LCOR_00502.1	-0.191526	0.875679	15.3696	17.5517	FALSE	0.27339	hypothetical protein RO3G_04756	502	1	1.65692e-43	68.0%	2	F:sequence-specific DNA binding transcription factor activity; F:sequence-specific DNA binding	0	IPR004827; IPR021833
LCOR_00503.1	1.05685	2.08039	0.523749	0.251756	FALSE	0.376125	---NA---	189	0			1	F:protein binding	0	IPR001452; IPR011511; G3DSA:2.30.30.40 (GENE3D), PTHR22820 (PANTHER), PTHR22820:SF19 (PANTHER), SignalP-NN(euk) (SIGNALP), tmhmm (TMHMM)
LCOR_00504.1	-0.607748	0.65622	17.3428	26.4284	FALSE	0.891067	---NA---	223	0			0	0		no IPS match
LCOR_00505.1	-0.315969	0.803311	7.52193	9.36366	FALSE	0.740783	---NA---	92	0			0	0		tmhmm (TMHMM)
LCOR_00506.1	-0.103806	0.930575	9.61265	10.3298	FALSE	0.433983	---NA---	143	0			0	0		no IPS match
LCOR_00507.1	0.352693	1.27694	113.771	89.0967	TRUE	0.00554404	---NA---	382	0			0	0		tmhmm (TMHMM)
LCOR_00508.1	-0.711139	0.610838	215.519	352.825	FALSE	0.69838	endosulphine family protein	120	20	2.0965e-46	78.75%	0	0		IPR006760; PTHR10358 (PANTHER), PTHR10358:SF3 (PANTHER)
LCOR_00509.1	-1.25569	0.418793	0.0722753	0.17258	FALSE	0.656344	phosphoketolase	840	20	0	68.35%	2	P:carbohydrate metabolic process; F:aldehyde-lyase activity	EC:4.1.2.0	IPR005593; IPR009014; IPR018969; IPR018970; IPR019790; G3DSA:3.40.50.970 (GENE3D), PTHR31273 (PANTHER), PTHR31273:SF0 (PANTHER), SSF52518 (SUPERFAMILY)
LCOR_00510.1	-1.50626	0.352022	19.2665	54.731	TRUE	0.00752636	---NA---	230	0			0	0		SignalP-NN(euk) (SIGNALP), tmhmm (TMHMM)
LCOR_00511.1	-1.16482	0.446021	7.56589	16.9631	FALSE	0.0853905	---NA---	538	0			0	0		SignalP-NN(euk) (SIGNALP), tmhmm (TMHMM)
LCOR_00512.1	0.220674	1.16528	63.4047	54.4117	FALSE	0.0224493	hypothetical protein RO3G_09758	487	2	2.94514e-117	70.5%	0	0		no IPS match
LCOR_00513.1	-0.956088	0.515453	12.1979	23.6644	FALSE	0.242182	hypothetical protein RO3G_09758	833	1	1.28192e-130	66.0%	3	F:nucleic acid binding; P:nucleobase-containing compound metabolic process; F:3'-5' exonuclease activity	0	IPR002562; IPR012337; G3DSA:3.30.420.10 (GENE3D), PTHR13620 (PANTHER)
LCOR_00514.1	-1.26407	0.416366	9.1668	22.0162	FALSE	0.0450916	histone deacetylase 3	478	20	0	77.65%	2	F:histone deacetylase activity; P:histone deacetylation	0	IPR000286; IPR003084; IPR023801; PTHR10625:SF28 (PANTHER), SSF52768 (SUPERFAMILY)
LCOR_00515.1	-1.17414	0.443148	19.8214	44.7285	FALSE	0.0575768	hypothetical protein RO3G_02549	362	1	8.79181e-39	65.0%	2	F:sequence-specific DNA binding transcription factor activity; F:sequence-specific DNA binding	0	IPR004827; IPR013910; IPR023167; G3DSA:1.20.5.170 (GENE3D), SSF111430 (SUPERFAMILY)
LCOR_00516.1	-0.944986	0.519435	21.6903	41.7575	FALSE	0.466756	---NA---	259	0			0	0		no IPS match
LCOR_00517.1	-0.221436	0.857711	256.035	298.51	FALSE	0.367841	---NA---	189	0			3	F:heme binding; P:oxygen transport; F:oxygen binding	0	IPR000971; IPR009050; IPR012292; PTHR22924 (PANTHER)
LCOR_00518.1	-0.848465	0.555375	9.21213	16.5872	FALSE	0.522796	plasma membrane iron permease	394	20	3.6038e-109	57.5%	2	C:membrane; P:transmembrane transport	0	IPR004923; PTHR31632 (PANTHER), PTHR31632:SF0 (PANTHER), SignalP-NN(euk) (SIGNALP), tmhmm (TMHMM)
LCOR_00519.1	-1.25167	0.419961	8.84439	21.06	FALSE	0.0317837	negative elongation factor d-like	569	20	2.35378e-64	50.25%	1	C:nucleus	0	IPR006942
LCOR_00520.1	-1.99147	0.251482	10.7735	42.8401	TRUE	0.00152358	3-methyl-2-oxobutanoate dehydrogenase	390	20	0	82.25%	2	F:catalytic activity; P:metabolic process	0	IPR005475; IPR005476; IPR009014; IPR015941; G3DSA:3.40.50.970 (GENE3D), PTHR11624 (PANTHER), PTHR11624:SF21 (PANTHER), SSF52518 (SUPERFAMILY)
LCOR_00521.1	-0.746779	0.595933	209.027	350.757	FALSE	0.638959	60s ribosomal protein l37	92	20	1.20075e-41	83.35%	3	F:structural constituent of ribosome; C:ribosome; P:translation	0	IPR001569; IPR011331; IPR011332; IPR018267; PTHR10768:SF0 (PANTHER)
LCOR_00522.1	-0.346015	0.786754	7.34099	9.33073	FALSE	0.747613	g-protein alpha subunit	352	20	1.54908e-173	78.2%	7	F:GTPase activity; F:signal transducer activity; F:G-protein beta/gamma-subunit complex binding; F:G-protein coupled receptor binding; F:GTP binding; P:GTP catabolic process; P:adenylate cyclase-activating G-protein coupled receptor signaling pathway	0	IPR001019; IPR002975; IPR011025; IPR027417; G3DSA:3.40.50.300 (GENE3D), PTHR10218:SF49 (PANTHER)
LCOR_00523.1	0.388358	1.3089	114.224	87.2672	TRUE	0.00235256	---NA---	175	0			0	0		IPR001763; PTHR13253 (PANTHER)
LCOR_00524.1	-1.00497	0.49828	104.446	209.612	FALSE	0.180071	small nuclear ribonucleoprotein e	80	20	2.47129e-33	87.2%	1	C:spliceosomal complex	0	IPR001163; IPR006649; IPR010920; IPR027078; G3DSA:2.30.30.100 (GENE3D), PTHR11193:SF0 (PANTHER)
LCOR_00525.1	-0.566664	0.675176	6.14212	9.09706	FALSE	1	---NA---	247	0			0	0		no IPS match
LCOR_00526.1	-0.668648	0.629096	11.2487	17.8807	FALSE	0.883096	nitrilase cyanide hydratase and apolipoprotein n-acyltransferase	295	20	5.94714e-63	54.3%	1	P:nitrogen compound metabolic process	0	IPR003010; PTHR23088 (PANTHER), PTHR23088:SF0 (PANTHER)
LCOR_00527.1	-2.94696	0.129681	0.458413	3.53492	TRUE	0.000109035	cytochrome p450	520	20	0	59.25%	3	F:electron carrier activity; F:heme binding; P:oxidation-reduction process	0	IPR001128; IPR002401; IPR017972; PTHR24296 (PANTHER), PTHR24296:SF0 (PANTHER)
LCOR_00528.1	0.128212	1.09294	12.2241	11.1847	FALSE	0.0907365	hypothetical protein RO3G_13937	244	6	8.28937e-82	58.67%	3	F:iron ion binding; F:L-ascorbic acid binding; P:oxidation-reduction process	0	IPR006620
LCOR_00529.1	0.146986	1.10725	1720.95	1554.25	FALSE	0.050134	hypothetical protein RO3G_02456	221	2	7.30263e-29	76.5%	0	0		IPR018466; SignalP-NN(euk) (SIGNALP)
LCOR_00530.1	-0.61454	0.653138	38.8241	59.4424	FALSE	0.977808	hypothetical protein RO3G_07775	711	1	3.18035e-108	68.0%	0	0		PTHR14430 (PANTHER)
LCOR_00531.1	Inf	Inf	0.317359	0	FALSE	0.300813	---NA---	91	0			0	0		no IPS match
LCOR_00532.1	-0.117825	0.921576	8.97512	9.73888	FALSE	0.378235	---NA---	183	0			0	0		SignalP-NN(euk) (SIGNALP)
LCOR_00533.1	-1.64864	0.31894	25.0867	78.6564	TRUE	0.000517383	metallopeptidase	664	20	0	63.3%	2	F:metalloendopeptidase activity; P:proteolysis	EC:3.4.24.0	IPR001567; IPR024077; IPR024079; IPR024080; PTHR11804 (PANTHER), SSF55486 (SUPERFAMILY)
LCOR_00534.1	-1.55828	0.339556	17.8962	52.7046	TRUE	0.00269853	stomatin family protein	407	20	0	81.95%	1	C:membrane	0	IPR001107; IPR001972; PTHR10264:SF24 (PANTHER), SSF117892 (SUPERFAMILY)
LCOR_00535.1	-1.70919	0.305832	6.75858	22.099	TRUE	0.00223363	acyl- oxidase	698	20	0	69.55%	5	F:acyl-CoA oxidase activity; C:peroxisome; P:fatty acid beta-oxidation; F:acyl-CoA dehydrogenase activity; F:flavin adenine dinucleotide binding	EC:1.3.3.6; EC:1.3.99.3	IPR002655; IPR006090; IPR006091; IPR009075; IPR009100; IPR012258; IPR013786; G3DSA:1.20.140.10 (GENE3D), PTHR10909 (PANTHER)
LCOR_00536.1	-0.456276	0.728865	695.994	954.9	FALSE	0.836984	40s ribosomal protein s21	86	20	2.21252e-47	83.1%	3	F:structural constituent of ribosome; C:ribosome; P:translation	0	IPR001931; IPR018279
LCOR_00537.1	0.243662	1.18399	190.174	160.621	TRUE	0.00984553	---NA---	113	0			4	P:SRP-dependent cotranslational protein targeting to membrane; F:7S RNA binding; P:negative regulation of translational elongation; C:signal recognition particle	0	IPR008832; IPR009018
LCOR_00538.1	1.30613	2.47277	698.244	282.373	TRUE	6.02042e-09	fructose- -bisphosphatase	457	20	0	72.65%	3	F:ATP binding; F:6-phosphofructo-2-kinase activity; P:fructose metabolic process	EC:2.7.1.105	IPR003094; IPR013078; IPR013079; IPR016260; IPR027417; G3DSA:3.40.50.1240 (GENE3D), G3DSA:3.40.50.300 (GENE3D), SSF53254 (SUPERFAMILY)
LCOR_00539.1	-1.01331	0.495408	35.568	71.7953	FALSE	0.200434	---NA---	397	0			1	F:actin binding	0	IPR003124; IPR017987; PTHR23202 (PANTHER)
LCOR_00540.1	-0.967061	0.511547	15.4107	30.1257	FALSE	0.289466	tigr02453 family protein	318	20	1.09735e-106	57.1%	0	0		IPR012808
LCOR_00541.1	0.331501	1.25832	4.10847	3.26504	FALSE	0.103483	---NA---	307	0			0	0		no IPS match
LCOR_00542.1	-1.07936	0.473239	38.2797	80.8886	FALSE	0.1369	vacuolar dynamin-like gtpase	697	20	0	81.15%	2	F:GTP binding; F:GTPase activity	0	IPR000375; IPR001401; IPR003130; IPR019762; IPR020850; IPR022812; IPR027417; G3DSA:3.40.50.300 (GENE3D), PTHR11566:SF12 (PANTHER)
LCOR_00543.1	-0.866077	0.548637	6.21717	11.332	FALSE	0.535753	solute carrier family 35 member f2	324	20	1.27145e-50	54.8%	6	F:molecular_function; C:integral to membrane; C:membrane; P:biological_process; C:cellular_component; P:transport		IPR009262; SignalP-NN(euk) (SIGNALP), tmhmm (TMHMM), SSF103481 (SUPERFAMILY)
LCOR_00544.1	-0.348862	0.785203	10.0802	12.8377	FALSE	0.617135	---NA---	424	0			0	0		no IPS match
LCOR_00545.1	-0.354079	0.782369	191.905	245.288	FALSE	0.574057	heat shock protein sti-like	338	20	1.75153e-174	69.65%	1	F:protein binding	0	IPR001440; IPR006636; IPR011990; IPR013026; IPR019734; PTHR22904 (PANTHER), PTHR22904:SF14 (PANTHER), PF13414 (PFAM), SSF48452 (SUPERFAMILY)
LCOR_00546.1	-1.46364	0.362578	83.7007	230.849	TRUE	0.00625754	protein transporter sec61 subunit gamma	78	20	1.84717e-36	85.35%	3	P:protein targeting; C:membrane; F:P-P-bond-hydrolysis-driven protein transmembrane transporter activity	0	IPR001901; IPR008158; IPR023391; PTHR12309 (PANTHER), tmhmm (TMHMM)
LCOR_00547.1	-0.500308	0.706956	2.27737	3.22137	FALSE	1	---NA---	678	0			1	F:protein binding	0	IPR001810; IPR011990; IPR013026; IPR019734; G3DSA:1.20.1280.50 (GENE3D), G3DSA:3.80.10.10 (GENE3D), PTHR23125 (PANTHER), PF12937 (PFAM), SSF48452 (SUPERFAMILY), SSF52047 (SUPERFAMILY)
LCOR_00548.1	-1.50178	0.353119	1.01647	2.87856	FALSE	0.130057	esterase lipase	318	20	7.91847e-89	63.6%	2	P:metabolic process; F:hydrolase activity	0	IPR002168; IPR013094; G3DSA:3.40.50.1820 (GENE3D), PTHR23024 (PANTHER), SSF53474 (SUPERFAMILY)
LCOR_00549.1	-1.40379	0.377934	9.63409	25.4914	FALSE	0.0112274	alpha -mannosyltransferase	583	20	3.46855e-84	46.55%	2	P:GPI anchor biosynthetic process; C:intrinsic to endoplasmic reticulum membrane	0	IPR005599; PTHR22760:SF0 (PANTHER), SignalP-NN(euk) (SIGNALP), tmhmm (TMHMM)
LCOR_00550.1	Inf	Inf	0.0251453	0	FALSE	1	chitin deacetylase	447	20	2.23606e-143	63.1%	2	P:carbohydrate metabolic process; F:catalytic activity	0	IPR002509; IPR011330; PTHR10587 (PANTHER), PTHR10587:SF15 (PANTHER), SignalP-NN(euk) (SIGNALP)
LCOR_00551.1	-1.32461	0.399257	51.0048	127.749	FALSE	0.0227503	rna-binding protein 8a	199	20	2.35986e-38	67.7%	5	F:RNA binding; C:nucleus; C:cytoplasm; P:RNA processing; F:nucleotide binding	0	IPR000504; IPR008111; IPR012677; PTHR23139 (PANTHER), PTHR23139:SF24 (PANTHER), SSF54928 (SUPERFAMILY)
LCOR_00552.1	-0.449959	0.732064	0.793334	1.0837	FALSE	0.943351	neutral alkaline nonlysosomal ceramidase	717	20	0	60.65%	0	0		IPR006823; SignalP-NN(euk) (SIGNALP)
LCOR_00553.1	0.0483888	1.03411	81.427	78.7412	FALSE	0.0588462	ras-related gtp-binding protein	209	20	2.45561e-66	76.05%	8	F:GTP binding; P:small GTPase mediated signal transduction; F:GTPase activity; P:GTP catabolic process; P:intracellular protein transport; P:nucleocytoplasmic transport; C:intracellular; C:membrane	0	IPR001806; IPR002041; IPR003578; IPR003579; IPR005225; IPR020849; IPR027417; G3DSA:3.40.50.300 (GENE3D), PTHR24073 (PANTHER), PS51419 (PROFILE)
LCOR_00554.1	-0.743167	0.597427	5.44183	9.10878	FALSE	0.630266	beta and beta-prime subunits of dna dependent rna-polymerase	1154	20	0	75.9%	4	F:DNA binding; F:DNA-directed RNA polymerase activity; C:nucleus; F:ribonucleoside binding	EC:2.7.7.6	IPR007120; IPR007121; IPR007641; IPR007642; IPR007644; IPR007645; IPR007647; IPR009674; IPR014724; IPR015712; G3DSA:3.90.1100.10 (GENE3D), PTHR20856:SF5 (PANTHER), SSF64484 (SUPERFAMILY)
LCOR_00555.1	-1.16856	0.444865	42.407	95.3255	FALSE	0.0778048	snornp protein	204	20	1.6209e-63	87.1%	5	F:snoRNA binding; P:snRNA pseudouridine synthesis; P:ribosome biogenesis; F:pseudouridine synthase activity; C:box H/ACA snoRNP complex	EC:5.4.99.12	IPR007504; IPR009000; IPR021154; G3DSA:2.40.10.230 (GENE3D)
LCOR_00556.1	-0.713257	0.609941	157.676	258.51	FALSE	0.774946	glycosyltransferase family 2 protein	1115	20	0	66.75%	1	F:heme binding	0	IPR001199; IPR004835; PTHR22914 (PANTHER), SignalP-NN(euk) (SIGNALP), tmhmm (TMHMM), SSF53448 (SUPERFAMILY)
LCOR_00557.1	-0.220702	0.858148	15.2142	17.7291	FALSE	0.469961	mechanosensitive ion channel	755	20	0	52.7%	3	F:calcium ion binding; C:membrane; P:transmembrane transport	0	IPR002048; IPR006685; IPR010920; IPR011992; IPR018247; PTHR31618 (PANTHER), PTHR31618:SF0 (PANTHER), tmhmm (TMHMM)
LCOR_00558.1	-1.36533	0.388147	277.268	714.338	FALSE	0.0850243	hypothetical protein RO3G_12477	470	3	7.08493e-81	51.67%	3	F:sequence-specific DNA binding transcription factor activity; F:sequence-specific DNA binding; C:nucleus	0	IPR001356; IPR009057; IPR017970; PTHR24329 (PANTHER), PTHR24329:SF75 (PANTHER)
LCOR_00559.1	-0.768456	0.587045	11.0449	18.8144	FALSE	0.725726	---NA---	115	0			0	0		no IPS match
LCOR_00560.1	-1.09328	0.468695	3.44368	7.34738	FALSE	0.345175	dna repair protein nse1	300	20	1.18546e-33	52.0%	2	P:DNA repair; C:Smc5-Smc6 complex	0	IPR011513; IPR013083; IPR014857; PTHR20973:SF0 (PANTHER), SignalP-NN(euk) (SIGNALP), SSF57850 (SUPERFAMILY)
LCOR_00561.1	-0.494772	0.709674	15.8499	22.334	FALSE	0.891342	dwnn-domain-containing protein	432	20	8.98036e-146	54.8%	4	F:protein binding; F:zinc ion binding; F:nucleic acid binding; C:nucleus	0	IPR001841; IPR001878; IPR013083; IPR014891; IPR025829; PTHR15439 (PANTHER), PTHR15439:SF0 (PANTHER), SSF57850 (SUPERFAMILY)
LCOR_00562.1	1.3705	2.5856	0.920467	0.355998	TRUE	0.00302463	hypothetical protein RO3G_14050	677	3	3.7208e-66	50.33%	0	0		IPR008862
LCOR_00563.1	-1.6633	0.315717	28.8311	91.3195	TRUE	0.000493642	formaldehyde dehydrogenase	379	20	1.1282e-172	82.75%	3	F:zinc ion binding; P:ethanol oxidation; F:S-(hydroxymethyl)glutathione dehydrogenase activity	EC:1.1.1.284	IPR002085; IPR002328; IPR011032; IPR013149; IPR013154; IPR014183; IPR016040; PTHR11695:SF4 (PANTHER), SSF51735 (SUPERFAMILY)
LCOR_00564.1	-0.799026	0.574737	95.338	165.881	FALSE	0.631454	kinase-like protein	446	20	0	80.3%	4	F:ATP binding; P:protein phosphorylation; F:protein serine/threonine kinase activity; F:protein tyrosine kinase activity	EC:2.7.11.0; EC:2.7.10.0	IPR000719; IPR002290; IPR008271; IPR011009; IPR017441; IPR020635; G3DSA:1.10.510.10 (GENE3D), G3DSA:3.30.200.20 (GENE3D), PTHR24360 (PANTHER), PTHR24360:SF3 (PANTHER)
LCOR_00565.1	-0.952569	0.516712	14.4775	28.0185	FALSE	0.307242	bem46 family protein	290	20	6.31346e-100	65.3%	0	0		G3DSA:3.40.50.1820 (GENE3D), PTHR12277 (PANTHER), PF12695 (PFAM), SignalP-NN(euk) (SIGNALP), tmhmm (TMHMM), SSF53474 (SUPERFAMILY)
LCOR_00566.1	-1.27092	0.414396	10.3175	24.8976	FALSE	0.102455	---NA---	194	0			1	P:response to stress	0	IPR006015; IPR006016; IPR014729; PTHR31964 (PANTHER), PTHR31964:SF0 (PANTHER), SSF52402 (SUPERFAMILY)
LCOR_00567.1	-2.59804	0.165162	10.875	65.8444	TRUE	9.03189e-08	serine hydroxymethyltransferase	502	20	0	79.45%	4	F:glycine hydroxymethyltransferase activity; P:glycine metabolic process; P:L-serine metabolic process; F:pyridoxal phosphate binding	EC:2.1.2.1	IPR001085; IPR015421; IPR015422; IPR015424; PTHR11680:SF0 (PANTHER)
LCOR_00568.1	-0.697328	0.616714	30.0941	48.7976	FALSE	0.745383	hypothetical protein RO3G_06496	426	1	1.71733e-53	62.0%	2	F:nucleic acid binding; F:nucleotide binding	0	IPR000504; IPR003034; IPR012677; PTHR14127 (PANTHER), PTHR14127:SF0 (PANTHER), SSF54928 (SUPERFAMILY), SSF68906 (SUPERFAMILY)
LCOR_00569.1	-0.0455129	0.968945	149.933	154.738	FALSE	0.144197	---NA---	89	0			0	0		no IPS match
LCOR_00570.1	0.731702	1.6606	696.525	419.442	TRUE	0.000105054	hypothetical protein RO3G_07533	264	2	5.99116e-73	67.0%	0	0		tmhmm (TMHMM)
LCOR_00571.1	-0.0673713	0.954375	47.1461	49.3999	FALSE	0.38566	---NA---	157	0			0	0		no IPS match
LCOR_00572.1	-0.345964	0.786782	31.3927	39.9001	FALSE	0.550055	---NA---	472	0			2	F:nucleic acid binding; F:nucleotide binding	0	IPR000504; IPR012677; SSF54928 (SUPERFAMILY)
LCOR_00573.1	-1.14101	0.453441	3.36928	7.43048	FALSE	0.200198	camp-dependent protein kinase	478	20	7.50376e-168	75.95%	4	F:ATP binding; P:protein phosphorylation; F:protein serine/threonine kinase activity; F:protein tyrosine kinase activity	EC:2.7.11.0; EC:2.7.10.0	IPR000719; IPR000961; IPR002290; IPR008271; IPR011009; IPR017441; IPR020635; G3DSA:1.10.510.10 (GENE3D), G3DSA:3.30.200.20 (GENE3D), PTHR24353 (PANTHER)
LCOR_00574.1	-1.49958	0.353657	69.0928	195.366	TRUE	0.00695455	nadh-ubiquinone oxidoreductase 49 kda	496	20	0	84.0%	3	F:quinone binding; F:NAD binding; P:oxidation-reduction process	0	IPR001135; IPR014029; IPR022885; G3DSA:1.10.645.10 (GENE3D), PTHR11993 (PANTHER), PTHR11993:SF10 (PANTHER), SSF56762 (SUPERFAMILY)
LCOR_00575.1	-1.47957	0.358595	2.26136	6.30617	FALSE	0.0402077	golgi ph regulator	448	20	2.32006e-67	57.5%	21	C:Golgi cisterna membrane; P:protein transport; F:ion channel activity; F:voltage-gated ion channel activity; C:integral to membrane; C:membrane; P:ion transport; C:Golgi membrane; P:transport; P:regulation of ion transmembrane transport; C:Golgi apparatus; P:regulation of anion transport; F:voltage-gated anion channel activity; P:intracellular pH reduction; F:molecular_function; C:cellular_compo…		IPR015672; IPR022535; IPR025969; SignalP-NN(euk) (SIGNALP), tmhmm (TMHMM)
LCOR_00576.1	-0.707703	0.612294	49.2842	80.491	FALSE	0.814128	hypothetical protein RO3G_11046	154	1	6.51926e-26	83.0%	1	F:acid-amino acid ligase activity	EC:6.3.2.0	IPR000608; IPR016135; PTHR24067 (PANTHER), PTHR24067:SF35 (PANTHER)
LCOR_00577.1	-1.50491	0.352351	6.50283	18.4555	TRUE	0.00487432	lysine-specific permease	579	20	0	63.75%	3	P:amino acid transmembrane transport; F:amino acid transmembrane transporter activity; C:membrane	0	IPR002293; IPR004841; PTHR11785:SF80 (PANTHER), tmhmm (TMHMM)
LCOR_00578.1	-Inf	0	0	0.0733701	FALSE	0.698654	glycosyl hydrolase family	372	20	0	79.65%	1	F:catalytic activity	0	IPR008928; IPR010905; IPR012341
LCOR_00579.1	-1.65092	0.318437	5.61852	17.6441	TRUE	0.00396485	zip metal ion	348	20	8.05249e-73	53.45%	4	C:membrane; P:metal ion transport; F:metal ion transmembrane transporter activity; P:transmembrane transport	0	IPR003689; PTHR16133 (PANTHER), SignalP-NN(euk) (SIGNALP), tmhmm (TMHMM)
LCOR_00580.1	-1.63116	0.322829	26.0693	80.7525	TRUE	0.00850379	---NA---	145	0			0	0		no IPS match
LCOR_00581.1	-0.220515	0.858259	145.216	169.198	FALSE	0.466732	---NA---	361	0			0	0		PTHR31595 (PANTHER), PTHR31595:SF0 (PANTHER), PF13813 (PFAM), SignalP-NN(euk) (SIGNALP), tmhmm (TMHMM)
LCOR_00582.1	-0.0746164	0.949595	5.48966	5.78106	FALSE	0.596479	---NA---	87	0			0	0		tmhmm (TMHMM)
LCOR_00583.1	-1.16483	0.446016	16.1936	36.3072	FALSE	0.0882126	ph domain protein	836	5	1.55793e-119	47.2%	2	F:protein binding; F:phospholipid binding	0	IPR001849; IPR011993; PTHR31941 (PANTHER), SSF50729 (SUPERFAMILY)
LCOR_00584.1	-0.532632	0.691292	51.5	74.4982	FALSE	0.995367	potential allantoate permease	489	20	0	60.65%	2	C:integral to membrane; P:transmembrane transport	0	IPR011701; IPR016196; IPR020846; G3DSA:1.20.1250.20 (GENE3D), PTHR11662 (PANTHER), PTHR11662:SF4 (PANTHER), tmhmm (TMHMM)
LCOR_00585.1	-Inf	0	0	0.106133	FALSE	1	---NA---	81	0			0	0		no IPS match
LCOR_00586.1	-0.949563	0.517789	8.5415	16.4961	FALSE	0.355014	mfs allantoate transporter	522	20	0	59.25%	2	C:integral to membrane; P:transmembrane transport	0	IPR011701; IPR016196; IPR020846; G3DSA:1.20.1250.20 (GENE3D), PTHR11662 (PANTHER), PTHR11662:SF4 (PANTHER), tmhmm (TMHMM)
LCOR_00587.1	-1.49975	0.353614	16.5548	46.8161	TRUE	0.00411093	prenyl protease	447	20	0	66.8%	3	F:metalloendopeptidase activity; C:membrane; P:CAAX-box protein processing	EC:3.4.24.0	IPR001915; IPR027057; G3DSA:3.30.2010.10 (GENE3D), PTHR10120 (PANTHER), tmhmm (TMHMM)
LCOR_00588.1	-0.880133	0.543317	14.8068	27.2525	FALSE	0.373614	protein tssc1	368	20	3.78741e-72	53.8%	1	F:protein binding	0	IPR001680; IPR015943; IPR017986; IPR019775; PTHR14205 (PANTHER), PTHR14205:SF6 (PANTHER)
LCOR_00589.1	-Inf	0	0	0.0187022	FALSE	1	glycosyltransferase family 2 protein	459	20	4.2056e-73	56.0%	2	F:transferase activity; F:transferase activity, transferring glycosyl groups		PTHR10587 (PANTHER), PTHR10587:SF1 (PANTHER), SignalP-NN(euk) (SIGNALP), tmhmm (TMHMM)
LCOR_00590.1	-1.17124	0.44404	13.4033	30.1848	FALSE	0.0559495	rna-binding protein involved in translational partial	643	20	8.64527e-51	71.75%	1	F:protein binding	0	IPR001660; IPR011510; IPR013761; PTHR12515 (PANTHER), PTHR12515:SF5 (PANTHER)
LCOR_00591.1	-0.0332765	0.977198	3.43226	3.51235	FALSE	0.326916	hypothetical protein RO3G_03826	354	1	2.08135e-30	62.0%	2	F:protein binding; F:phospholipid binding	0	IPR001849; IPR011993; SSF50729 (SUPERFAMILY)
LCOR_00592.1	0.291931	1.22428	161.548	131.954	FALSE	0.019224	hypothetical protein RO3G_03825	492	3	1.5432e-59	59.0%	2	F:sequence-specific DNA binding transcription factor activity; F:sequence-specific DNA binding	0	IPR001356; IPR009057; PTHR24325 (PANTHER), PTHR24325:SF3 (PANTHER)
LCOR_00593.1	-0.477386	0.718278	48.3737	67.3468	FALSE	0.906987	get1_copc7 ame: full=protein get1 ame: full=guided entry of tail-anchored proteins 1	187	20	1.18118e-48	62.15%	5	C:endoplasmic reticulum membrane; C:integral to membrane; C:membrane; C:endoplasmic reticulum; P:transport		PF04420 (PFAM), SignalP-NN(euk) (SIGNALP), tmhmm (TMHMM)
LCOR_00594.1	-0.540298	0.687629	84.9148	123.489	FALSE	1	hypothetical protein RO3G_05512	374	7	1.1861e-93	49.0%	2	; P:metabolic process		PTHR23063 (PANTHER), tmhmm (TMHMM)
LCOR_00595.1	-0.99047	0.503314	1.66485	3.30778	FALSE	0.440093	hypothetical protein RO3G_02043	747	1	2.17257e-77	47.0%	3	F:sequence-specific DNA binding RNA polymerase II transcription factor activity; C:nucleus; F:zinc ion binding	0	IPR001138; PTHR31944 (PANTHER), PTHR31944:SF0 (PANTHER)
LCOR_00596.1	-0.836019	0.560187	1.40487	2.50785	FALSE	0.659862	hypothetical protein RO3G_14266	678	1	5.87972e-65	51.0%	3	F:sequence-specific DNA binding RNA polymerase II transcription factor activity; C:nucleus; F:zinc ion binding	0	IPR001138
LCOR_00597.1	-0.104422	0.930178	7.71877	8.29817	FALSE	0.223291	hypothetical protein RO3G_14266	664	1	6.48853e-92	58.0%	4	F:sequence-specific DNA binding RNA polymerase II transcription factor activity; C:nucleus; F:zinc ion binding; F:DNA binding	0	IPR001138; IPR007219; tmhmm (TMHMM)
LCOR_00599.1	-Inf	0	0	0.10791	FALSE	0.698654	nad dependent epimerase protein	239	20	8.91919e-58	56.55%	3	F:molecular_function; P:biological_process; C:cellular_component		IPR027417; PTHR10366 (PANTHER), PTHR10366:SF1 (PANTHER)
LCOR_00600.1	-0.976244	0.508301	7.36602	14.4914	FALSE	0.28344	---NA---	463	0			0	0		no IPS match
LCOR_00601.1	0.15048	1.10994	11.1608	10.0554	FALSE	0.0786506	---NA---	304	0			4	F:DNA binding; C:nucleus; P:double-strand break repair; P:DNA recombination	0	IPR010585; IPR014751
LCOR_00602.1	-1.06964	0.476437	8.19734	17.2055	FALSE	0.174095	histidyl-trna synthetase	507	20	0	72.5%	4	C:cytoplasm; F:histidine-tRNA ligase activity; F:ATP binding; P:histidyl-tRNA aminoacylation	EC:6.1.1.21	IPR004154; IPR004516; IPR006195; IPR015807; G3DSA:3.30.930.10 (GENE3D), PF13393 (PFAM), SSF55681 (SUPERFAMILY)
LCOR_00603.1	0.553518	1.46766	0.197412	0.134508	FALSE	0.408653	sodium:dicarboxylate symporter	546	20	1.45676e-120	67.85%	3	P:dicarboxylic acid transport; C:membrane; F:sodium:dicarboxylate symporter activity	0	IPR001991; G3DSA:1.10.3860.10 (GENE3D), PTHR11958:SF26 (PANTHER), tmhmm (TMHMM), SSF118215 (SUPERFAMILY)
LCOR_00604.1	1.26771	2.40779	154.79	64.287	TRUE	4.55539e-08	protein phosphatase 2c 80	357	20	8.6103e-122	60.35%	1	F:catalytic activity	0	IPR001932; PTHR12320 (PANTHER), PTHR12320:SF0 (PANTHER), SignalP-NN(euk) (SIGNALP)
LCOR_00605.1	-0.504822	0.704747	6.2803	8.91142	FALSE	0.964532	hypothetical protein RO3G_03422	330	3	2.83812e-89	60.0%	0	0		G3DSA:3.40.50.1820 (GENE3D), PTHR10992 (PANTHER), PF12697 (PFAM), SSF53474 (SUPERFAMILY)
LCOR_00606.1	-0.710323	0.611183	4.91017	8.03387	FALSE	0.801726	hypothetical protein RO3G_05471	295	2	4.36959e-93	63.0%	2	F:RNA binding; F:ribonuclease T2 activity		no IPS match
LCOR_00607.1	-0.789574	0.578515	65.6245	113.436	FALSE	0.534448	rna-binding domain-containing protein	179	20	7.38572e-33	80.05%	2	F:nucleic acid binding; F:nucleotide binding	0	IPR000504; IPR012677; PTHR23147 (PANTHER), SSF54928 (SUPERFAMILY)
LCOR_00608.1	-0.278989	0.824168	0.417866	0.507015	FALSE	0.80463	---NA---	413	0			3	F:protein kinase activity; F:ATP binding; P:protein phosphorylation	0	IPR000719; IPR002290; IPR011009; G3DSA:1.10.510.10 (GENE3D), PTHR24343 (PANTHER), PTHR24343:SF55 (PANTHER)
LCOR_00609.1	-1.16991	0.444448	10.3598	23.3094	FALSE	0.0563891	vacuolar protein sorting-associated protein 51 homolog	789	20	6.81671e-56	61.2%	13	F:Rho guanyl-nucleotide exchange factor activity; P:regulation of Rho protein signal transduction; C:intracellular; P:lipid transport; P:Golgi vesicle transport; P:lipid digestion; C:Golgi apparatus; P:protein transport; P:Golgi organization; P:transport; F:molecular_function; P:biological_process; C:cellular_component		IPR014812; PTHR15954 (PANTHER), PTHR15954:SF4 (PANTHER)
LCOR_00610.1	-0.303504	0.810282	71.7473	88.5461	FALSE	0.557212	bar domain protein	589	20	6.34461e-105	55.7%	2	F:protein binding; C:cytoplasm	0	IPR001452; IPR004148; IPR027267; G3DSA:2.30.30.40 (GENE3D), PTHR10661 (PANTHER), PTHR10661:SF62 (PANTHER), SSF103657 (SUPERFAMILY)
LCOR_00611.1	-1.40801	0.376832	44.5906	118.33	TRUE	0.00903422	prefoldin subunit 3	181	20	6.22183e-84	74.85%	3	P:protein folding; C:prefoldin complex; F:unfolded protein binding	0	IPR004127; IPR009053; IPR016655; G3DSA:1.10.287.370 (GENE3D)
LCOR_00612.1	-2.80051	0.143536	0.451972	3.14883	TRUE	0.00714709	hypothetical protein RO3G_03088	483	2	2.6827e-135	57.5%	2	F:aspartic-type endopeptidase activity; P:proteolysis	EC:3.4.23.0	IPR001461; IPR021109; SignalP-NN(euk) (SIGNALP), tmhmm (TMHMM)
LCOR_00613.1	-0.0654865	0.955623	0.0147886	0.0154753	FALSE	1	---NA---	605	0			0	0		no IPS match
LCOR_00614.1	-0.758479	0.591119	15.4884	26.2018	FALSE	0.812681	apg12-domain-containing protein	121	20	2.61977e-33	74.3%	2	P:autophagic vacuole assembly; C:cytoplasm	0	IPR007242; G3DSA:3.10.20.90 (GENE3D), SSF54236 (SUPERFAMILY)
LCOR_00615.1	1.81664	3.52259	3.24446	0.921045	TRUE	0.00276117	---NA---	153	0			0	0		no IPS match
LCOR_00616.1	-0.37554	0.770817	587.694	762.43	FALSE	0.665128	histone h3	136	20	6.42618e-91	97.75%	4	C:nucleosome; F:DNA binding; P:nucleosome assembly; F:protein heterodimerization activity	0	IPR000164; IPR007125; IPR009072
LCOR_00617.1	-1.40044	0.378813	6.30206	16.6363	FALSE	0.0240524	protein	339	20	1.40048e-39	58.85%	1	C:nucleus	0	IPR003888; IPR003889; PTHR22715 (PANTHER), PTHR22715:SF0 (PANTHER)
LCOR_00618.1	-1.39365	0.380601	4.74441	12.4656	FALSE	0.0121171	nuclear pore complex protein nup205	2102	20	0	45.05%	1	C:nuclear pore	0	IPR021827
LCOR_00620.1	-1.2217	0.428779	4.88287	11.3879	FALSE	0.0389514	probable methyltransferase tarbp1	1611	20	0	48.7%	3	F:RNA binding; P:RNA processing; F:RNA methyltransferase activity	0	IPR001537; IPR016024; G3DSA:3.40.1280.10 (GENE3D), PTHR12029 (PANTHER), PTHR12029:SF11 (PANTHER), SSF75217 (SUPERFAMILY)
LCOR_00621.1	-1.06507	0.47795	7.99151	16.7204	FALSE	0.151059	mrna capping enzyme alpha subunit	799	20	1.00112e-111	53.35%	2	F:mRNA guanylyltransferase activity; P:7-methylguanosine mRNA capping	EC:2.7.7.50	IPR001339; IPR012340; IPR013846; G3DSA:3.30.470.30 (GENE3D), PTHR10367 (PANTHER), PTHR10367:SF0 (PANTHER), SSF56091 (SUPERFAMILY)
LCOR_00622.1	0.0842798	1.06016	8.56195	8.0761	FALSE	0.0718954	---NA---	541	0			1	F:protein binding	0	IPR001810; G3DSA:3.80.10.10 (GENE3D), PTHR23125 (PANTHER), PF12937 (PFAM), SSF52047 (SUPERFAMILY)
LCOR_00623.1	1.11597	2.16741	75.2078	34.6993	TRUE	1.26508e-07	-domain-containing partial	270	1	5.5042e-27	61.0%	0	0		IPR001623; IPR018253; PTHR24077 (PANTHER), tmhmm (TMHMM)
LCOR_00624.1	2.00435	4.01209	2353.4	586.577	TRUE	3.64248e-13	arrestin domain-containing protein	417	20	1.26387e-176	55.05%	4	C:integral to membrane; C:membrane; C:cytosol; P:cellular response to stress		IPR011021; IPR011022; IPR014756; PTHR11188 (PANTHER), PTHR11188:SF1 (PANTHER)
LCOR_00625.1	0.892822	1.8568	6.97849	3.75834	FALSE	0.0118562	---NA---	115	0			0	0		no IPS match
LCOR_00626.1	1.72542	3.30677	1223.14	369.888	TRUE	5.82166e-11	potassium ion transporter	715	20	5.61536e-114	59.6%	3	P:cation transport; F:cation transmembrane transporter activity; P:transmembrane transport	0	IPR003445; PTHR31064 (PANTHER), PTHR31064:SF0 (PANTHER), SignalP-NN(euk) (SIGNALP), tmhmm (TMHMM)
LCOR_00627.1	-0.081807	0.944873	0.37834	0.400414	FALSE	0.698654	c2 domain-containing protein	988	20	0	46.25%	1	F:protein binding	0	IPR000008; IPR008973; IPR018029; G3DSA:2.60.40.150 (GENE3D), PTHR10774 (PANTHER), PTHR10774:SF30 (PANTHER), tmhmm (TMHMM)
LCOR_00628.1	-1.40692	0.377117	2.67815	7.10164	FALSE	0.0414667	integrator complex subunit 2	560	20	2.33547e-102	45.75%	7	C:integrator complex; P:snRNA processing; C:intracellular; C:nuclear membrane; C:integral to membrane; C:membrane; C:nucleus		PTHR32515 (PANTHER), PTHR32515:SF0 (PANTHER)
LCOR_00629.1	-0.50298	0.705648	16.7162	23.6892	FALSE	1	---NA---	116	0			0	0		IPR012340
LCOR_00630.1	-0.447878	0.733121	36.2384	49.4304	FALSE	0.964532	rrna 2 -o-methyltransferase fibrillarin	313	20	5.43798e-156	90.95%	4	F:RNA binding; P:rRNA processing; P:tRNA processing; F:methyltransferase activity	EC:2.1.1.0	IPR000692; IPR020813; G3DSA:3.30.200.20 (GENE3D), G3DSA:3.40.50.150 (GENE3D), SSF53335 (SUPERFAMILY)
LCOR_00631.1	-0.718676	0.607655	7.85087	12.9199	FALSE	0.733602	protein	815	20	0	52.4%	3	P:alginic acid catabolic process; C:periplasmic space; F:poly(beta-D-mannuronate) lyase activity	EC:4.2.2.3	IPR008397; SignalP-NN(euk) (SIGNALP), tmhmm (TMHMM)
LCOR_00632.1	-2.20603	0.216729	3.86023	17.8113	TRUE	6.09804e-06	---NA---	427	0			0	0		IPR010730
LCOR_00633.1	-1.13466	0.455443	8.84869	19.4288	FALSE	0.177726	hypothetical protein RO3G_04085	203	1	1.35029e-27	56.0%	2	F:DNA binding; F:zinc ion binding	0	IPR001510; PTHR25702 (PANTHER), SSF57716 (SUPERFAMILY)
LCOR_00634.1	-0.803437	0.572983	15.1318	26.4088	FALSE	0.504747	transmembrane gtpase fzo1	867	20	0	58.4%	4	F:GTPase activity; F:GTP binding; P:mitochondrial fusion; C:mitochondrial outer membrane	0	IPR001401; IPR027091; IPR027094; IPR027417; G3DSA:3.40.50.300 (GENE3D), tmhmm (TMHMM)
LCOR_00635.1	-0.147368	0.902896	32.8891	36.4263	FALSE	0.206304	sh3 domain-containing protein	318	20	2.6638e-91	78.2%	1	F:protein binding	0	IPR001452; IPR007461; G3DSA:2.30.30.40 (GENE3D), PTHR15629 (PANTHER)
LCOR_00636.1	-2.2192	0.21476	35.0411	163.164	TRUE	2.47455e-05	glycoside hydrolase family 37 protein	589	20	4.37167e-180	56.75%	2	P:trehalose metabolic process; F:catalytic activity	0	IPR001661; IPR008928; IPR018232; PTHR23403:SF1 (PANTHER), SignalP-NN(euk) (SIGNALP)
LCOR_00637.1	1.75871	3.38396	0.237157	0.0700825	FALSE	0.606577	---NA---	122	0			0	0		no IPS match
LCOR_00638.1	0.0886766	1.06339	1.25767	1.18269	FALSE	0.543327	chorismate mutase	266	20	2.96913e-65	60.75%	2	F:chorismate mutase activity; P:aromatic amino acid family biosynthetic process	EC:5.4.99.5	IPR008238; IPR020822; PTHR21145:SF0 (PANTHER)
LCOR_00639.1	-0.454424	0.729801	11.4106	15.6352	FALSE	0.804721	tgf beta receptor associated protein	1098	20	2.59626e-106	48.8%	1	F:small GTPase regulator activity	0	IPR001180; IPR019452; IPR019453; PTHR12894 (PANTHER)
LCOR_00640.1	-0.95934	0.514292	18.3628	35.705	FALSE	0.232614	saps-domain-containing protein	818	20	0	58.9%	8	P:cell cycle; P:cell division; C:cytosol; P:regulation of chromosome segregation; C:centromeric heterochromatin; P:mitosis; F:protein binding; C:nucleus		IPR007587; PTHR12634:SF8 (PANTHER)
LCOR_00641.1	-0.817614	0.567379	5.78402	10.1943	FALSE	0.712171	vacuolar amino acid transporter 1	519	20	3.03187e-125	57.05%	2	C:integral to membrane; C:membrane		IPR013057; PTHR22950 (PANTHER), PTHR22950:SF9 (PANTHER), tmhmm (TMHMM)
LCOR_00642.1	1.04983	2.07029	0.348989	0.16857	FALSE	0.184346	hypothetical protein RO3G_05312	449	2	4.10219e-126	58.0%	0	0		IPR018955
LCOR_00643.1	0.400695	1.32014	2.59663	1.96693	FALSE	0.339385	---NA---	101	0			0	0		tmhmm (TMHMM)
LCOR_00644.1	-0.0907309	0.939047	23.6393	25.1737	FALSE	0.218637	haloacid dehalogenase superfamily protein	213	20	1.73253e-58	58.55%	0	0		IPR010021; IPR023214; PTHR19288 (PANTHER), PTHR19288:SF12 (PANTHER), SignalP-NN(euk) (SIGNALP)
LCOR_00647.1	-0.527016	0.693989	23.0865	33.2664	FALSE	0.961879	---NA---	573	0			0	0		no IPS match
LCOR_00648.1	0.640649	1.55903	27.3492	17.5424	TRUE	0.00029258	cytochrome p450 monooxygenase	544	20	0	54.55%	3	F:electron carrier activity; F:heme binding; P:oxidation-reduction process	0	IPR001128; IPR002401; PTHR24290 (PANTHER)
LCOR_00649.1	-1.83323	0.280636	0.419093	1.49337	FALSE	0.180615	---NA---	230	0			2	F:protein binding; F:phospholipid binding	0	IPR001849; IPR011993; SSF50729 (SUPERFAMILY)
LCOR_00650.1	-0.526168	0.694397	4.88668	7.03731	FALSE	1	-domain-containing protein	558	16	1.34369e-73	49.25%	2	C:intracellular; P:signal transduction	0	IPR000198; IPR008936; PTHR23178 (PANTHER)
LCOR_00651.1	-1.79046	0.28908	11.2038	38.7569	TRUE	3.33136e-05	atp-binding cassette sub-family d member 3	685	20	0	70.55%	4	F:ATP binding; F:ATPase activity; P:transport; C:membrane	EC:3.6.1.3	IPR003439; IPR003593; IPR010509; IPR017871; IPR017940; IPR027417; G3DSA:3.40.50.300 (GENE3D), PTHR11384 (PANTHER), PTHR11384:SF7 (PANTHER), SignalP-NN(euk) (SIGNALP)
LCOR_00652.1	-2.97744	0.12697	0.0336306	0.26487	FALSE	0.366883	---NA---	266	0			0	0		no IPS match
LCOR_00653.1	-0.605223	0.65737	389.388	592.342	FALSE	0.963841	mitogen-activated protein kinase spm1	462	20	2.30895e-88	63.7%	4	F:ATP binding; P:protein phosphorylation; F:protein serine/threonine kinase activity; F:protein tyrosine kinase activity	EC:2.7.11.0; EC:2.7.10.0	IPR000719; IPR002290; IPR008271; IPR011009; IPR020635; G3DSA:1.10.510.10 (GENE3D), G3DSA:3.30.200.20 (GENE3D), PTHR24055 (PANTHER)
LCOR_00654.1	-2.61594	0.163127	136.98	839.715	TRUE	6.51211e-09	phosphatidylserine phosphatidylglycerophosphate cardiolipin synthase-like protein	345	20	2.32204e-65	64.85%	2	F:catalytic activity; P:metabolic process	0	IPR001736; IPR025202; G3DSA:3.30.870.10 (GENE3D), PTHR21248 (PANTHER), PTHR21248:SF0 (PANTHER), SSF56024 (SUPERFAMILY)
LCOR_00655.1	-1.09653	0.467641	11.2802	24.1215	FALSE	0.224771	xaa-pro aminopeptidase	506	20	1.98151e-165	56.25%	3	P:cellular process; F:aminopeptidase activity; F:manganese ion binding	EC:3.4.11.0	IPR000994; IPR001131; IPR007865; G3DSA:3.40.350.10 (GENE3D), PTHR10804 (PANTHER), PTHR10804:SF17 (PANTHER), SSF53092 (SUPERFAMILY)
LCOR_00656.1	-0.832677	0.561486	3.41972	6.09047	FALSE	0.829761	---NA---	95	0			0	0		no IPS match
LCOR_00658.1	-0.877194	0.544425	282.186	518.319	FALSE	0.539146	ubiquitin-60s ribosomal protein l40 fusion protein	179	20	1.73023e-56	90.05%	1	F:protein binding	0	IPR000626; IPR019954; IPR019955; IPR019956; G3DSA:3.10.20.90 (GENE3D), PTHR10666 (PANTHER), SSF54236 (SUPERFAMILY)
LCOR_00659.1	-0.581739	0.668158	140.523	210.313	FALSE	0.971537	gtp-binding nuclear protein gsp1 ran	271	20	6.01025e-148	93.65%	8	F:GTP binding; P:small GTPase mediated signal transduction; F:GTPase activity; P:GTP catabolic process; P:intracellular protein transport; P:nucleocytoplasmic transport; C:intracellular; C:membrane	0	IPR001806; IPR002041; IPR003578; IPR003579; IPR005225; IPR020849; IPR027417; G3DSA:3.40.50.300 (GENE3D), PTHR24071 (PANTHER)
LCOR_00660.1	-1.51305	0.350369	14.7091	41.9816	TRUE	0.00244039	phospholipase a-2-activating protein	783	20	0	57.35%	1	F:protein binding	0	IPR001680; IPR013535; IPR015155; IPR015943; IPR017986; IPR020472; PTHR19849 (PANTHER), PTHR19849:SF0 (PANTHER)
LCOR_00661.1	-1.39413	0.380474	3.3333	8.76091	FALSE	0.0402493	lysyl-trna synthetase	524	20	1.26226e-151	64.3%	5	F:lysine-tRNA ligase activity; F:ATP binding; P:lysyl-tRNA aminoacylation; F:nucleic acid binding; C:cytoplasm	EC:6.1.1.6	IPR002313; IPR004364; IPR004365; IPR006195; IPR012340; IPR018149; IPR018150; G3DSA:3.30.930.10 (GENE3D), SignalP-NN(euk) (SIGNALP), SSF55681 (SUPERFAMILY)
LCOR_00662.1	-0.198521	0.871444	16.8968	19.3894	FALSE	0.583115	---NA---	88	0			0	0		no IPS match
LCOR_00663.1	0.35284	1.27707	10.347	8.10209	TRUE	0.00855377	dead deah box helicase	745	20	0	59.5%	3	F:nucleic acid binding; F:ATP binding; F:ATP-dependent helicase activity	0	IPR001650; IPR011545; IPR014001; IPR027417; G3DSA:3.40.50.300 (GENE3D), PTHR24031 (PANTHER), PTHR24031:SF122 (PANTHER)
LCOR_00664.1	1.61662	3.06656	2228.98	726.865	TRUE	5.55746e-07	---NA---	82	0			0	0		no IPS match
LCOR_00665.1	-1.52519	0.347434	10.6184	30.5623	TRUE	0.00480345	---NA---	353	0			0	0		IPR021740
LCOR_00667.1	-2.67076	0.157044	30.4189	193.697	TRUE	2.20932e-08	nadh-cytochrome b5 reductase	334	20	8.11425e-109	66.1%	2	F:oxidoreductase activity; P:oxidation-reduction process	0	IPR001433; IPR001709; IPR001834; IPR008333; IPR017927; IPR017938; G3DSA:2.40.30.10 (GENE3D), G3DSA:3.40.50.80 (GENE3D), PTHR19370 (PANTHER), PTHR19370:SF8 (PANTHER), SSF52343 (SUPERFAMILY)
LCOR_00668.1	-2.01972	0.246606	0.663081	2.68883	FALSE	0.0191442	major facilitator superfamily transporter	502	20	0	53.7%	2	C:integral to membrane; P:transmembrane transport	0	IPR011701; IPR016196; IPR020846; G3DSA:1.20.1250.20 (GENE3D), PTHR24003 (PANTHER), PTHR24003:SF78 (PANTHER), tmhmm (TMHMM)
LCOR_00669.1	-0.353908	0.782462	262.324	335.255	FALSE	0.633189	serine threonine protein kinase ksp1	415	20	2.60401e-104	55.85%	4	F:ATP binding; P:protein phosphorylation; F:protein serine/threonine kinase activity; F:protein tyrosine kinase activity	EC:2.7.11.0; EC:2.7.10.0	IPR000719; IPR002290; IPR008271; IPR011009; IPR017441; IPR020635; G3DSA:1.10.510.10 (GENE3D), G3DSA:3.30.200.20 (GENE3D), PTHR24343 (PANTHER), PTHR24343:SF0 (PANTHER)
LCOR_00670.1	-1.07698	0.474022	46.0527	97.1533	FALSE	0.108583	ykt6p	194	20	2.80513e-102	74.6%	2	C:integral to membrane; P:vesicle-mediated transport	0	IPR001388; IPR010908; IPR011012; G3DSA:1.20.5.110 (GENE3D), PTHR21136 (PANTHER), PTHR21136:SF5 (PANTHER), SignalP-NN(euk) (SIGNALP)
LCOR_00671.1	-1.06403	0.478294	150.452	314.561	FALSE	0.152727	hypoxanthine-guanine phosphoribosyltransferase	218	20	1.39957e-86	75.5%	3	F:hypoxanthine phosphoribosyltransferase activity; C:cytoplasm; P:purine ribonucleoside salvage	EC:2.4.2.8	IPR000836; IPR005904; G3DSA:3.40.50.2020 (GENE3D), PTHR22573 (PANTHER), PTHR22573:SF8 (PANTHER), SSF53271 (SUPERFAMILY)
LCOR_00672.1	-0.694458	0.617941	23.7321	38.4051	FALSE	0.805553	hypothetical protein RO3G_11140	104	1	4.35075e-27	78.0%	0	0		IPR013892
LCOR_00673.1	-0.965573	0.512075	3.73922	7.3021	FALSE	0.330701	hypothetical protein RO3G_07180	600	1	6.31168e-119	63.0%	2	F:nucleic acid binding; F:nucleotide binding	0	IPR000504; IPR012677; PTHR16274 (PANTHER), SignalP-NN(euk) (SIGNALP), SSF54928 (SUPERFAMILY)
LCOR_00674.1	-0.824506	0.564676	14.7183	26.0651	FALSE	0.462897	hypothetical protein RO3G_07179	908	1	4.45975e-163	70.0%	1	F:protein binding	0	IPR000008; IPR000449; IPR006608; IPR008973; IPR009060; IPR015940; G3DSA:1.10.8.10 (GENE3D), G3DSA:2.60.40.150 (GENE3D), PTHR13076 (PANTHER), PTHR13076:SF4 (PANTHER)
LCOR_00675.1	-1.85076	0.277246	3.60631	13.0076	TRUE	0.000310991	hypothetical protein RO3G_07178	841	4	5.99408e-68	60.5%	3	F:Rho guanyl-nucleotide exchange factor activity; C:intracellular; P:regulation of Rho protein signal transduction	0	IPR000219; SSF50729 (SUPERFAMILY)
LCOR_00676.1	-1.04708	0.483945	36.8725	76.1914	FALSE	0.157079	-domain-containing protein	718	20	2.37461e-172	63.85%	3	F:unfolded protein binding; P:protein folding; F:heat shock protein binding		IPR001623; IPR004000; G3DSA:3.30.420.40 (GENE3D), tmhmm (TMHMM), SSF53067 (SUPERFAMILY)
LCOR_00677.1	-0.691288	0.619301	10.9146	17.6241	FALSE	0.825634	---NA---	201	0			0	0		no IPS match
LCOR_00678.1	-0.916912	0.529642	25.6351	48.4008	FALSE	0.28523	---NA---	294	0			0	0		IPR021128; tmhmm (TMHMM)
LCOR_00680.1	-1.02052	0.492939	19.169	38.8871	FALSE	0.154308	atpase regulatory subunit	540	20	8.94014e-141	61.6%	4	F:nucleoside-triphosphatase activity; F:ATP binding; P:protein folding; F:unfolded protein binding	EC:3.6.1.15	IPR003593; IPR004487; IPR013093; IPR019489; IPR027417; G3DSA:1.10.8.60 (GENE3D), G3DSA:3.40.50.300 (GENE3D), PTHR11262 (PANTHER)
LCOR_00681.1	-1.05104	0.48262	8.69	18.0059	FALSE	0.189574	histone acetyltransferase type b catalytic subunit	395	20	4.46229e-127	57.25%	5	C:histone acetyltransferase complex; F:histone acetyltransferase activity; P:chromatin silencing at telomere; P:histone acetylation; F:histone binding	EC:2.3.1.48	IPR002717; IPR013523; IPR016181; IPR017380; IPR019467
LCOR_00682.1	-0.339159	0.790502	6.98151	8.83175	FALSE	0.765472	acidic 82 kda	361	20	2.53875e-56	71.15%	1	C:plastid		IPR014810; PTHR21686 (PANTHER)
LCOR_00683.1	-0.502065	0.706095	57.8522	81.9325	FALSE	1	hypothetical protein RO3G_12477	380	4	2.01589e-58	53.75%	3	F:sequence-specific DNA binding transcription factor activity; F:sequence-specific DNA binding; C:nucleus	0	IPR001356; IPR009057; IPR017970; PTHR24329 (PANTHER), PTHR24329:SF75 (PANTHER)
LCOR_00684.1	0.939187	1.91745	15.7072	8.19171	TRUE	0.000232417	---NA---	247	0			2	P:DNA repair; C:Smc5-Smc6 complex	0	IPR011513; PTHR20973:SF0 (PANTHER)
LCOR_00685.1	-1.54973	0.341575	4.68607	13.719	TRUE	0.00349391	actinin-like protein	619	20	0	69.85%	4	F:actin binding; F:calcium ion binding; P:actin filament bundle assembly; P:actin crosslink formation	0	IPR001589; IPR001715; IPR002048; IPR011992; IPR014837; IPR026921; G3DSA:1.20.58.60 (GENE3D), PTHR11915 (PANTHER), SSF46966 (SUPERFAMILY), SSF47473 (SUPERFAMILY)
LCOR_00686.1	-0.808556	0.570953	37.1586	65.0817	FALSE	0.477547	hypothetical protein RO3G_15537	267	11	5.86933e-47	55.64%	0	0		IPR010756
LCOR_00687.1	-Inf	0	0	0.046728	FALSE	1	---NA---	215	0			0	0		no IPS match
LCOR_00688.1	-2.94217	0.130113	0.642218	4.93586	TRUE	0.000254421	hypothetical protein RO3G_07549	381	1	1.89856e-26	68.0%	0	0		no IPS match
LCOR_00689.1	-1.51067	0.350947	0.232856	0.663508	FALSE	0.604903	---NA---	163	0			0	0		no IPS match
LCOR_00690.1	0.240225	1.18118	0.369291	0.312647	FALSE	0.615807	---NA---	238	0			0	0		no IPS match
LCOR_00691.1	1.23166	2.34837	1.0662	0.454016	FALSE	0.142526	---NA---	122	0			0	0		no IPS match
LCOR_00692.1	-0.997962	0.500707	0.303293	0.60573	FALSE	0.618473	---NA---	813	0			0	0		no IPS match
LCOR_00693.1	-1.07413	0.474958	13.2088	27.8105	FALSE	0.222857	hypothetical protein RO3G_09801	179	1	6.71742e-53	74.0%	0	0		IPR019398; PTHR21250 (PANTHER), PTHR21250:SF0 (PANTHER)
LCOR_00694.1	-1.12921	0.457166	28.9179	63.2546	FALSE	0.162411	hypothetical protein RO3G_10267	105	1	6.12962e-36	86.0%	0	0		IPR012340; IPR013970
LCOR_00695.1	-0.538377	0.688545	0.469208	0.681448	FALSE	1	serine threonine protein kinase	525	20	7.5562e-128	60.45%	4	F:ATP binding; P:protein phosphorylation; F:protein serine/threonine kinase activity; F:protein tyrosine kinase activity	EC:2.7.11.0; EC:2.7.10.0	IPR000719; IPR002290; IPR008271; IPR011009; IPR017441; IPR020635; G3DSA:1.10.510.10 (GENE3D), G3DSA:3.30.200.20 (GENE3D), PTHR24343 (PANTHER), PTHR24343:SF42 (PANTHER)
LCOR_00697.1	-1.41638	0.374651	2.20217	5.87794	FALSE	0.0770957	---NA---	386	0			0	0		tmhmm (TMHMM)
LCOR_00698.1	-0.664145	0.631062	5.33322	8.45117	FALSE	0.891008	---NA---	586	0			1	F:metal ion binding	0	IPR000306; IPR011011; IPR013083; IPR017455; PTHR12673 (PANTHER)
LCOR_00699.1	-1.76641	0.293939	4.56127	15.5177	TRUE	0.000223618	rho-type gtpase-activating protein 1	1075	20	0	58.95%	3	C:intracellular; P:signal transduction; F:zinc ion binding	0	IPR000198; IPR001781; IPR008936; PTHR24215 (PANTHER), PTHR24215:SF10 (PANTHER), SSF57716 (SUPERFAMILY)
LCOR_00700.1	-0.496447	0.70885	15.2135	21.4622	FALSE	0.987515	---NA---	126	0			4	F:magnesium ion binding; P:fatty acid biosynthetic process; F:holo-[acyl-carrier-protein] synthase activity; P:macromolecule biosynthetic process	EC:2.7.8.7	IPR002582; IPR004568; IPR008278
LCOR_00702.1	-0.192042	0.875366	18.7117	21.3759	FALSE	0.472471	anth-domain-containing protein	88	20	3.55951e-34	87.15%	1	F:phospholipid binding	0	IPR008942; IPR011417; IPR013809; PTHR10407 (PANTHER), PTHR10407:SF2 (PANTHER)
LCOR_00703.1	-0.912735	0.531177	74.6444	140.526	FALSE	0.342906	cation efflux pump	540	20	2.61555e-134	65.0%	7	F:structural constituent of ribosome; C:ribosome; P:translation; P:cation transport; F:cation transmembrane transporter activity; C:integral to membrane; P:transmembrane transport	0	IPR001515; IPR002524; IPR018263; IPR027469; IPR027470; PTHR23413 (PANTHER), tmhmm (TMHMM)
LCOR_00706.1	0.196105	1.1456	219.83	191.89	FALSE	0.0396827	---NA---	116	0			0	0		no IPS match
LCOR_00707.1	0.520241	1.4342	61.0605	42.5748	TRUE	0.0030584	transcription factor	595	20	0	68.05%	1	F:protein binding	0	IPR001680; IPR015943; IPR017986; IPR019775; IPR020472; PTHR16017 (PANTHER), PTHR16017:SF0 (PANTHER)
LCOR_00708.1	-Inf	0	0	0.110161	FALSE	0.466756	hypothetical protein RO3G_09830	341	4	3.19778e-61	69.5%	0	0		tmhmm (TMHMM)
LCOR_00710.1	-1.38096	0.383964	25.351	66.0245	TRUE	0.00933453	aminoglycoside phosphotransferase	371	20	6.30666e-175	68.1%	3	F:transferase activity; P:protein phosphorylation; F:protein serine/threonine kinase activity		IPR002575; IPR011009; G3DSA:3.90.1200.10 (GENE3D), PTHR24757 (PANTHER), PTHR24757:SF3 (PANTHER)
LCOR_00711.1	0.806338	1.74877	72.0544	41.203	TRUE	9.98168e-06	protein cgi121	289	20	1.37101e-46	62.1%	2	F:nucleic acid binding; F:zinc ion binding	0	IPR001878; IPR013926; SSF143870 (SUPERFAMILY)
LCOR_00712.1	0.0622648	1.0441	42.0856	40.3078	FALSE	0.0561822	---NA---	443	0			0	0		IPR013907
LCOR_00713.1	-0.974205	0.50902	8.28676	16.2798	FALSE	0.367378	---NA---	181	0			0	0		PD472859 (PRODOM)
LCOR_00714.1	-1.63477	0.322022	1.09912	3.41317	FALSE	0.0261165	dehydrogenase e1 and transketolase domain-containing protein 1	961	20	0	69.75%	3	F:oxoglutarate dehydrogenase (succinyl-transferring) activity; P:tricarboxylic acid cycle; F:thiamine pyrophosphate binding	EC:1.2.4.2	IPR001017; IPR005475; IPR011603; G3DSA:3.40.50.970 (GENE3D), PTHR23152:SF0 (PANTHER), SignalP-NN(euk) (SIGNALP), tmhmm (TMHMM), SSF52518 (SUPERFAMILY)
LCOR_00715.1	-1.1608	0.447264	37.891	84.7175	FALSE	0.0936666	60s ribosomal protein l31	105	20	3.45947e-59	78.75%	1	C:ribosome		IPR016340
LCOR_00716.1	-0.993208	0.50236	16.0575	31.9641	FALSE	0.208113	dhs-like nad fad-binding domain-containing protein	379	20	3.01948e-136	62.35%	1	F:NAD+ binding	0	IPR003000; IPR026590; IPR026591; G3DSA:3.40.50.1220 (GENE3D), SSF52467 (SUPERFAMILY)
LCOR_00717.1	0.166215	1.12211	154.327	137.533	FALSE	0.0902795	---NA---	271	0			0	0		no IPS match
LCOR_00718.1	0.110025	1.07925	11.466	10.6241	FALSE	0.0589366	arginyl-trna synthetase	582	20	0	63.7%	4	F:arginine-tRNA ligase activity; F:ATP binding; C:cytoplasm; P:arginyl-tRNA aminoacylation	EC:6.1.1.19	IPR001278; IPR001412; IPR005148; IPR008909; IPR009080; IPR014729; IPR015945; G3DSA:1.10.730.10 (GENE3D), SSF52374 (SUPERFAMILY)
LCOR_00719.1	-1.18588	0.439555	4.28907	9.75776	FALSE	0.177312	vea protein	313	20	5.47417e-62	52.7%	4	P:autophagy; C:late endosome; P:protein transport; P:transport		IPR021740
LCOR_00720.1	-0.836693	0.559926	0.12312	0.219886	FALSE	1	bet v1-like protein	291	2	2.24651e-92	57.0%	0	0		IPR002913; IPR023393; PTHR19308 (PANTHER), PTHR19308:SF0 (PANTHER), SSF55961 (SUPERFAMILY)
LCOR_00721.1	-0.0987141	0.933865	161.406	172.837	FALSE	0.1504	---NA---	81	0			0	0		IPR007872; PTHR21454 (PANTHER), SSF144217 (SUPERFAMILY)
LCOR_00722.1	-0.185027	0.879633	184.712	209.987	FALSE	0.281616	endoplasmic reticulum protein	218	20	2.0834e-85	63.7%	3	C:endoplasmic reticulum; P:intracellular protein transport; C:integral to membrane	0	IPR008417; PTHR12701:SF2 (PANTHER), SignalP-NN(euk) (SIGNALP), tmhmm (TMHMM)
LCOR_00723.1	1.09827	2.14098	0.286098	0.13363	FALSE	0.154	endoplasmic reticulum protein	503	20	1.17685e-107	49.35%	2	F:protein binding; P:N-glycan processing	0	IPR002172; IPR009011; IPR026874; G3DSA:2.70.130.10 (GENE3D), PTHR12630 (PANTHER), PF12999 (PFAM), PF13015 (PFAM), SignalP-NN(euk) (SIGNALP), tmhmm (TMHMM)
LCOR_00724.1	-0.526146	0.694407	7.85409	11.3105	FALSE	0.940016	c2h2 finger domain-containing protein	713	20	9.04175e-167	72.85%	2	F:protein binding; F:zinc ion binding	0	IPR001841; IPR007087; IPR013083; IPR015880; PTHR22938 (PANTHER), PTHR22938:SF0 (PANTHER), SSF57850 (SUPERFAMILY)
LCOR_00725.1	1.96594	3.90668	66.2699	16.9632	TRUE	1.22923e-12	---NA---	352	0			1	F:protein binding	0	IPR001611; IPR001810; IPR006553; G3DSA:3.80.10.10 (GENE3D), PTHR23125 (PANTHER), PF12937 (PFAM), SSF52047 (SUPERFAMILY)
LCOR_00726.1	1.07144	2.10153	3049.59	1451.13	TRUE	6.38491e-07	cytochrome c oxidase subunit iv	181	20	1.53963e-52	63.75%	1	F:cytochrome-c oxidase activity	EC:1.9.3.1	IPR004203; PTHR10707 (PANTHER), PTHR10707:SF0 (PANTHER)
LCOR_00727.1	1.69077	3.22828	87.6434	27.1486	TRUE	1.32806e-09	---NA---	664	0			2	F:protein binding; F:zinc ion binding	0	IPR001965; IPR011011; IPR013083; IPR019786; IPR019787; PTHR23123 (PANTHER), PTHR23123:SF0 (PANTHER)
LCOR_00728.1	-0.24548	0.843535	31.2021	36.9897	FALSE	0.392901	hypothetical protein RO3G_14367	919	1	5.70518e-40	53.0%	0	0		no IPS match
LCOR_00729.1	-1.47397	0.35999	8.05264	22.3691	FALSE	0.0249034	---NA---	193	0			2	C:nuclear pore; P:transport	0	IPR007231
LCOR_00730.1	-0.0589961	0.959932	12.7007	13.2308	FALSE	0.174095	---NA---	442	0			1	F:protein binding	0	IPR001810; G3DSA:3.80.10.10 (GENE3D), PTHR23125 (PANTHER), PF12937 (PFAM), SignalP-NN(euk) (SIGNALP), SSF52047 (SUPERFAMILY)
LCOR_00731.1	0.0189087	1.01319	0.845919	0.834905	FALSE	0.488419	---NA---	511	0			1	F:protein binding	0	IPR001810; G3DSA:1.20.1280.50 (GENE3D)
LCOR_00732.1	-1.40484	0.377659	106.859	282.951	FALSE	0.0165359	hypothetical protein RO3G_14943	69	2	7.99685e-34	86.0%	2	C:mitochondrion; F:NADH dehydrogenase (ubiquinone) activity	EC:1.6.5.3	IPR012576; tmhmm (TMHMM)
LCOR_00733.1	0.240043	1.18103	101.244	85.725	FALSE	0.0234693	heat shock protein	664	20	0	85.6%	3	F:ATP binding; P:protein folding; F:unfolded protein binding	0	IPR012725; IPR013126; IPR018181; G3DSA:1.20.1270.10 (GENE3D), G3DSA:2.60.34.10 (GENE3D), G3DSA:3.30.30.30 (GENE3D), G3DSA:3.30.420.40 (GENE3D), G3DSA:3.90.640.10 (GENE3D), PTHR19375 (PANTHER), PTHR19375:SF1 (PANTHER), SSF100920 (SUPERFAMILY), SSF100934 (SUPERFAMILY), SSF53067 (SUPERFAMILY)
LCOR_00734.1	-0.915665	0.5301	43.0441	81.2	FALSE	0.300668	secreted protein	219	20	1.45063e-42	57.0%	0	0		IPR004911; PTHR13234:SF8 (PANTHER), SignalP-NN(euk) (SIGNALP), tmhmm (TMHMM)
LCOR_00735.1	-1.37292	0.38611	0.314332	0.814099	FALSE	0.518052	2-hydroxyglutarate dehydrogenase	528	20	0	61.3%	2	F:oxidoreductase activity; P:oxidation-reduction process	0	IPR006076; G3DSA:3.30.9.10 (GENE3D), G3DSA:3.50.50.60 (GENE3D), PTHR13847 (PANTHER), PTHR13847:SF23 (PANTHER), SignalP-NN(euk) (SIGNALP), tmhmm (TMHMM), SSF51905 (SUPERFAMILY)
LCOR_00736.1	-0.522333	0.696245	23.7468	34.107	FALSE	1	dna-directed rna polymerase i and iii subunit rpc19	140	20	7.33023e-42	73.7%	2	F:DNA binding; F:DNA-directed RNA polymerase activity	EC:2.7.7.6	IPR008193; IPR009025; G3DSA:3.30.1360.10 (GENE3D), PTHR13946 (PANTHER), PTHR13946:SF17 (PANTHER), PF13656 (PFAM)
LCOR_00737.1	-1.84623	0.278118	5.32384	19.1424	TRUE	0.000203426	guanine nucleotide exchange factor lte1	1428	20	4.74082e-70	51.6%	3	F:guanyl-nucleotide exchange factor activity; C:intracellular; P:regulation of small GTPase mediated signal transduction	0	IPR000651; IPR001895; IPR008937; IPR019804; IPR023578; G3DSA:1.20.870.10 (GENE3D), PTHR23113:SF27 (PANTHER)
LCOR_00738.1	-0.547357	0.684273	50.0273	73.1101	FALSE	0.966263	calmodulin	173	20	4.62983e-35	57.85%	2	F:protein binding; F:calcium ion binding	0	IPR000261; IPR002048; IPR011992; IPR018247; PTHR23050 (PANTHER), SSF47473 (SUPERFAMILY)
LCOR_00739.1	-0.390591	0.762817	7.42024	9.72742	FALSE	0.691017	sulfate permease	794	20	0	64.3%	4	F:secondary active sulfate transmembrane transporter activity; P:sulfate transport; P:transmembrane transport; C:integral to membrane	0	IPR001902; IPR002645; IPR011547; IPR018045; PTHR11814 (PANTHER), PTHR11814:SF9 (PANTHER), PF13792 (PFAM), tmhmm (TMHMM)
LCOR_00740.1	-0.684992	0.622009	0.0314264	0.0505239	FALSE	1	aquaporin- partial	356	20	4.17614e-94	61.35%	3	F:transporter activity; P:transport; C:membrane	0	IPR000425; IPR023271; PTHR19139:SF17 (PANTHER), tmhmm (TMHMM)
LCOR_00741.1	0.410967	1.32958	191.985	144.396	TRUE	0.00526849	nucleoside diphosphatase gda1	506	20	0	65.95%	3	C:Golgi membrane; F:guanosine-diphosphatase activity; P:cellular protein modification process	EC:3.6.1.42	IPR000407; IPR015605; SignalP-NN(euk) (SIGNALP), tmhmm (TMHMM)
LCOR_00742.1	-0.73395	0.601256	44.5967	74.1726	FALSE	0.631034	glycosyltransferase family 2 protein	476	20	0	78.75%	2	F:transferase activity; F:transferase activity, transferring glycosyl groups		PD339107 (PRODOM), G3DSA:3.90.550.10 (GENE3D), PTHR10587 (PANTHER), PTHR10587:SF1 (PANTHER), PF13641 (PFAM), SignalP-NN(euk) (SIGNALP), tmhmm (TMHMM), SSF53448 (SUPERFAMILY)
LCOR_00743.1	-0.419294	0.747791	10.5143	14.0605	FALSE	0.798632	phosphoprotein phosphatase	280	9	4.87102e-55	55.22%	1	F:protein binding	0	IPR004274; IPR023214
LCOR_00744.1	1.80212	3.48733	3.61365	1.03622	TRUE	0.000120982	d-xylose reductase	322	20	6.67641e-142	69.55%	2	F:oxidoreductase activity; P:oxidation-reduction process	0	IPR001395; IPR018170; IPR020471; IPR023210; PTHR11732:SF34 (PANTHER)
LCOR_00745.1	-0.791617	0.577696	438.314	758.727	FALSE	0.646777	40s ribosomal protein s2	254	20	6.45118e-140	88.15%	4	F:structural constituent of ribosome; P:translation; C:small ribosomal subunit; F:RNA binding	0	IPR000851; IPR005324; IPR005711; IPR013810; IPR014720; IPR014721; IPR018192; IPR020568; PTHR13718:SF4 (PANTHER), SSF54768 (SUPERFAMILY)
LCOR_00746.1	0.396036	1.31589	42.3826	32.2084	TRUE	0.00251837	cell division control protein 2 homolog	349	20	6.21527e-114	68.7%	4	F:ATP binding; P:protein phosphorylation; F:protein serine/threonine kinase activity; F:protein tyrosine kinase activity	EC:2.7.11.0; EC:2.7.10.0	IPR000719; IPR002290; IPR008271; IPR011009; IPR017441; IPR020635; G3DSA:1.10.510.10 (GENE3D), G3DSA:3.30.200.20 (GENE3D), PTHR24056 (PANTHER)
LCOR_00747.1	-0.1363	0.909849	17.845	19.6131	FALSE	0.226382	hypothetical protein RO3G_02082	1222	2	1.27328e-113	63.0%	0	0		IPR002716; IPR006596; IPR018834; G3DSA:3.40.50.1010 (GENE3D), PTHR13548 (PANTHER), PTHR13548:SF0 (PANTHER), SSF48452 (SUPERFAMILY), SSF88723 (SUPERFAMILY)
LCOR_00749.1	-1.16553	0.445801	50.7829	113.914	FALSE	0.0902387	---NA---	182	0			0	0		IPR009069; IPR010625; PTHR13523 (PANTHER)
LCOR_00751.1	-2.15296	0.224851	4.80302	21.3608	TRUE	4.54057e-06	regulator of g protein signaling	697	20	6.80475e-58	52.5%	2	P:termination of G-protein coupled receptor signaling pathway; P:intracellular signal transduction	0	IPR000342; IPR000591; IPR011991; IPR016137; IPR024066; G3DSA:1.10.167.10 (GENE3D), PTHR10845 (PANTHER), PTHR10845:SF44 (PANTHER), SSF46785 (SUPERFAMILY)
LCOR_00752.1	-1.1646	0.446087	5.62514	12.61	FALSE	0.115483	polyribonucleotide 5 -hydroxyl-kinase clp1	434	20	0	63.95%	35	F:ATP binding; F:nucleotide binding; P:mRNA processing; F:nucleoside-triphosphatase activity; C:nucleus; P:negative regulation of cyclin-dependent protein kinase activity; F:ATP-dependent polyribonucleotide 5'-hydroxyl-kinase activity; F:cyclin-dependent protein kinase inhibitor activity; F:polydeoxyribonucleotide kinase activity; P:tRNA splicing, via endonucleolytic cleavage and ligation; P:regu…		IPR010655; IPR027417; G3DSA:3.40.50.300 (GENE3D), PTHR12755 (PANTHER), PF03205 (PFAM)
LCOR_00753.1	0.274883	1.2099	160.768	132.878	FALSE	0.0104	phosphatase-like protein	216	20	1.45454e-70	60.9%	0	0		IPR007482; PTHR11035:SF3 (PANTHER), SignalP-NN(euk) (SIGNALP), tmhmm (TMHMM)
LCOR_00754.1	0.579166	1.49399	2.10224	1.40714	FALSE	0.0971255	meiotic recombination protein dmc1 lim15 homolog	405	20	4.31784e-156	69.15%	4	F:DNA binding; F:ATP binding; P:DNA metabolic process; F:DNA-dependent ATPase activity	0	IPR010995; IPR013632; IPR020587; IPR020588; IPR027417; G3DSA:1.10.150.20 (GENE3D), G3DSA:3.40.50.300 (GENE3D), PTHR22942 (PANTHER), PTHR22942:SF13 (PANTHER), tmhmm (TMHMM)
LCOR_00755.1	-1.27874	0.412154	0.099763	0.242053	FALSE	1	---NA---	112	0			0	0		no IPS match
LCOR_00757.1	-0.523876	0.695501	61.1651	87.944	FALSE	0.995966	protein ergic-53-like	503	20	3.57112e-119	54.95%	1	C:membrane	0	IPR005052; IPR008985; IPR013320; SignalP-NN(euk) (SIGNALP), tmhmm (TMHMM)
LCOR_00758.1	0.838537	1.78824	147.395	82.4248	TRUE	4.37421e-05	hypothetical protein RO3G_01826	339	1	2.61414e-27	93.0%	2	F:zinc ion binding; F:nucleic acid binding	0	IPR007087; IPR013087; IPR015880; PTHR11389 (PANTHER), PF13465 (PFAM), SSF57667 (SUPERFAMILY)
LCOR_00759.1	0.192042	1.14238	144.825	126.774	FALSE	0.0405263	monovalent inorganic cation transporter	676	20	0	75.9%	5	P:sodium ion transport; P:regulation of pH; F:sodium:hydrogen antiporter activity; C:integral to membrane; P:transmembrane transport	0	IPR004709; IPR006153; IPR018422; PTHR10110:SF20 (PANTHER), SignalP-NN(euk) (SIGNALP), tmhmm (TMHMM)
LCOR_00760.1	0.877108	1.83669	568.402	309.471	TRUE	5.10028e-05	---NA---	342	0			0	0		tmhmm (TMHMM)
LCOR_00761.1	2.2494	4.75484	1140.27	239.812	TRUE	4.20551e-13	cyclin domain-containing protein	175	1	3.67341e-67	82.0%	2	P:regulation of cyclin-dependent protein kinase activity; F:protein kinase binding	0	IPR013763; IPR013922; PTHR15615 (PANTHER)
LCOR_00762.1	2.03617	4.10156	68.8716	16.7916	TRUE	5.19215e-12	---NA---	176	0			0	0		tmhmm (TMHMM)
LCOR_00763.1	1.10671	2.15354	57.4826	26.6921	TRUE	9.86126e-07	---NA---	357	0			0	0		no IPS match
LCOR_00764.1	0.594685	1.51014	121.346	80.3538	TRUE	0.000735813	glycoside hydrolase family 37 protein	754	20	0	74.7%	4	F:catalytic activity; F:calcium ion binding; C:cytoplasm; P:trehalose catabolic process	0	IPR001661; IPR008928; IPR011120; IPR018232; PTHR23403:SF1 (PANTHER)
LCOR_00765.1	-1.4026	0.378246	1.90005	5.02333	FALSE	0.261259	---NA---	108	0			0	0		SignalP-NN(euk) (SIGNALP), tmhmm (TMHMM)
LCOR_00766.1	-0.645852	0.639115	22.1254	34.6188	FALSE	0.81405	natural resistance-associated macrophage protein	535	20	4.62317e-156	64.85%	3	F:transporter activity; P:transport; C:membrane	0	IPR001046; tmhmm (TMHMM)
LCOR_00767.1	-1.5327	0.34563	74.5764	215.77	TRUE	0.00229157	hypothetical protein RO3G_11622	156	1	3.74938e-33	71.0%	0	0		IPR012471
LCOR_00768.1	-0.998425	0.500546	2.2301	4.45534	FALSE	0.217444	nfx1-type zinc finger-containing protein 1	1932	20	0	45.9%	5	F:sequence-specific DNA binding transcription factor activity; F:zinc ion binding; C:nuclear pore; P:intracellular protein transport; F:protein transporter activity	0	IPR000967; IPR001494; IPR027417; G3DSA:3.40.50.300 (GENE3D), PTHR10887 (PANTHER), PTHR10887:SF10 (PANTHER), PF13086 (PFAM), PF13087 (PFAM)
LCOR_00769.1	-0.0583161	0.960384	48.2958	50.2879	FALSE	0.140048	hypothetical protein RO3G_12028	302	1	9.30232e-33	65.0%	0	0		IPR001441; PTHR21528 (PANTHER), PTHR21528:SF0 (PANTHER)
LCOR_00770.1	-0.936707	0.522424	29.9939	57.4129	FALSE	0.286663	hypothetical protein RO3G_03127	245	2	4.52144e-35	84.5%	3	F:sequence-specific DNA binding RNA polymerase II transcription factor activity; C:nucleus; F:zinc ion binding	0	IPR001138; PTHR31944 (PANTHER)
LCOR_00771.1	-1.29287	0.408137	16.2308	39.768	FALSE	0.0578413	domain protein	135	15	1.70898e-37	68.67%	0	0		IPR002634; G3DSA:3.30.70.1500 (GENE3D), PTHR12735 (PANTHER), SignalP-NN(euk) (SIGNALP)
LCOR_00772.1	0.143164	1.10432	261.071	236.408	FALSE	0.0360419	hypothetical protein RO3G_01770	258	5	3.0477e-36	59.6%	0	0		IPR018466; SignalP-NN(euk) (SIGNALP)
LCOR_00773.1	-0.251277	0.840152	21.7174	25.8493	FALSE	0.587526	---NA---	97	0			0	0		no IPS match
LCOR_00775.1	-0.859336	0.551206	166.648	302.332	FALSE	0.561025	tat pathway signal sequence	350	20	2.10462e-119	55.95%	2	P:lipid metabolic process; F:phosphoric diester hydrolase activity	EC:3.1.4.0	IPR017946; PTHR13593 (PANTHER), PTHR13593:SF3 (PANTHER), SignalP-NN(euk) (SIGNALP)
LCOR_00776.1	-0.569199	0.673991	194.378	288.398	FALSE	1	hypothetical protein RO3G_16296	258	2	1.21307e-37	64.5%	0	0		IPR006861; PTHR12299 (PANTHER)
LCOR_00777.1	0.208737	1.15568	1.04934	0.907987	FALSE	0.622048	---NA---	377	0			3	P:protein dephosphorylation; F:protein tyrosine/serine/threonine phosphatase activity; F:protein tyrosine phosphatase activity	EC:3.1.3.48	IPR000340; IPR000387; IPR016130; IPR020422; IPR024950; G3DSA:3.90.190.10 (GENE3D), tmhmm (TMHMM), SSF52799 (SUPERFAMILY)
LCOR_00778.1	-0.462045	0.725956	157.622	217.123	FALSE	0.838792	rab small monomeric gtpase	207	20	1.20043e-126	91.55%	8	F:GTP binding; P:small GTPase mediated signal transduction; F:GTPase activity; P:GTP catabolic process; P:intracellular protein transport; P:nucleocytoplasmic transport; C:intracellular; C:membrane	0	IPR001806; IPR002041; IPR003578; IPR003579; IPR005225; IPR020849; IPR027417; G3DSA:3.40.50.300 (GENE3D), PTHR24073 (PANTHER), PTHR24073:SF57 (PANTHER), PS51419 (PROFILE), SignalP-NN(euk) (SIGNALP)
LCOR_00779.1	Inf	Inf	0.0425262	0	FALSE	0.468217	alkaline phosphatase	527	20	0	60.95%	2	P:metabolic process; F:phosphatase activity	EC:3.1.3.0	IPR001952; IPR017849; IPR017850; PTHR11596 (PANTHER), PTHR11596:SF5 (PANTHER), tmhmm (TMHMM)
LCOR_00780.1	-Inf	0	0	0.562907	FALSE	0.0164425	---NA---	217	0			0	0		tmhmm (TMHMM)
LCOR_00781.1	-0.83496	0.560599	74.7572	133.353	FALSE	0.458851	eukaryotic translation initiation factor 2 subunit beta	302	20	4.68136e-100	88.45%	2	F:translation initiation factor activity; P:translational initiation	0	IPR002735; IPR016189; IPR016190; PTHR23001 (PANTHER), PTHR23001:SF3 (PANTHER)
LCOR_00782.1	-0.166543	0.890975	61.4421	68.9605	FALSE	0.237459	adenosylmethionine decarboxylase	396	20	4.21812e-164	54.35%	3	F:adenosylmethionine decarboxylase activity; P:spermine biosynthetic process; P:spermidine biosynthetic process	EC:4.1.1.50	IPR001985; IPR016067; IPR018166; IPR018167; PTHR11570:SF0 (PANTHER)
LCOR_00783.1	-0.201117	0.869877	38.2872	44.0145	FALSE	0.295555	translation initiation factor eif-2b delta subunit	541	20	0	64.1%	1	P:cellular metabolic process	0	IPR000649; G3DSA:3.40.50.10470 (GENE3D), PTHR10233:SF14 (PANTHER), SSF100950 (SUPERFAMILY)
LCOR_00784.1	-0.241414	0.845916	8.01004	9.46908	FALSE	0.373155	pin domain-like protein	1079	20	0	65.75%	4	F:single-stranded DNA binding; F:endonuclease activity; C:nucleus; P:nucleotide-excision repair	0	IPR001044; IPR006084; IPR006085; IPR006086; IPR008918; IPR019974; IPR020045; G3DSA:1.10.150.20 (GENE3D), G3DSA:3.40.50.1010 (GENE3D), SSF88723 (SUPERFAMILY)
LCOR_00785.1	-0.00583627	0.995963	26.8279	26.9366	FALSE	0.18049	---NA---	272	0			2	F:sequence-specific DNA binding transcription factor activity; F:sequence-specific DNA binding	0	IPR004827; G3DSA:1.20.5.170 (GENE3D)
LCOR_00786.1	-1.20272	0.434455	20.6653	47.566	FALSE	0.0936146	---NA---	161	0			3	F:RNA binding; F:ribonuclease III activity; P:RNA processing	EC:3.1.26.3	IPR000999
LCOR_00787.1	-0.582969	0.667588	6.76726	10.1369	FALSE	1	hypothetical protein RO3G_00589	433	2	8.3892e-33	83.0%	2	F:zinc ion binding; F:nucleic acid binding	0	IPR007087; IPR013087; IPR015880; PTHR11389 (PANTHER), PTHR11389:SF377 (PANTHER), PF13894 (PFAM), SSF57667 (SUPERFAMILY)
LCOR_00788.1	-1.08947	0.469935	0.968159	2.0602	FALSE	0.455656	---NA---	517	0			1	F:zinc ion binding	0	IPR004181; PTHR10782 (PANTHER), PTHR10782:SF15 (PANTHER), SignalP-NN(euk) (SIGNALP)
LCOR_00789.1	-0.310052	0.806613	13.6351	16.9041	FALSE	0.494112	hypothetical protein RO3G_14026	634	1	5.54778e-96	59.0%	0	0		no IPS match
LCOR_00790.1	-0.730359	0.602754	3.40737	5.653	FALSE	0.992511	---NA---	93	0			0	0		no IPS match
LCOR_00791.1	-1.60925	0.327769	139.96	427.007	TRUE	0.00392786	thiamin pyrophosphokinase-related protein	331	20	1.99569e-125	61.05%	1	F:hydrolase activity	0	IPR000086; IPR015797; PTHR13622 (PANTHER), PTHR13622:SF2 (PANTHER)
LCOR_00792.1	-1.00856	0.497044	11.9863	24.1152	FALSE	0.175668	atp-dependent rna helicase ddx42-like	701	20	0	73.35%	3	F:nucleic acid binding; F:ATP binding; F:ATP-dependent helicase activity	0	IPR000629; IPR001650; IPR011545; IPR014001; IPR014014; IPR027417; G3DSA:3.40.50.300 (GENE3D), PTHR24031 (PANTHER), PTHR24031:SF125 (PANTHER)
LCOR_00793.1	-0.825994	0.564093	18.3841	32.5904	FALSE	0.466732	flap endonuclease 1	381	20	3.74116e-146	76.55%	3	F:nuclease activity; P:DNA repair; F:DNA binding	0	IPR006084; IPR006085; IPR006086; IPR008918; IPR019974; IPR020045; G3DSA:1.10.150.20 (GENE3D), G3DSA:3.40.50.1010 (GENE3D), PTHR11081:SF9 (PANTHER), SSF88723 (SUPERFAMILY)
LCOR_00794.1	1.00327	2.00453	323.646	161.457	TRUE	2.59351e-06	---NA---	261	0			0	0		no IPS match
LCOR_00795.1	0.243117	1.18355	38.7231	32.7179	FALSE	0.0118747	hypothetical protein RO3G_12699	455	6	6.25634e-82	55.0%	0	0		IPR009449
LCOR_00796.1	-1.17233	0.443704	26.3167	59.3114	FALSE	0.0559495	clathrin adaptor mu subunit	436	20	0	89.7%	4	P:intracellular protein transport; P:vesicle-mediated transport; C:clathrin adaptor complex; F:protein binding	0	IPR001392; IPR008968; IPR011012; IPR018240; IPR022775; G3DSA:2.60.40.1170 (GENE3D), G3DSA:3.30.450.60 (GENE3D), PTHR11998 (PANTHER), PTHR11998:SF11 (PANTHER)
LCOR_00797.1	-1.05895	0.479981	4.86197	10.1295	FALSE	0.182424	bis(5 -nucleosyl)- symmetrical	584	20	9.12234e-84	53.75%	1	F:hydrolase activity	0	IPR004843; G3DSA:3.60.21.10 (GENE3D), PTHR24032 (PANTHER), PTHR24032:SF1 (PANTHER), SignalP-NN(euk) (SIGNALP), tmhmm (TMHMM), SSF56300 (SUPERFAMILY), SSF69118 (SUPERFAMILY)
LCOR_00798.1	0.640167	1.55851	0.110332	0.0707932	FALSE	0.610712	---NA---	508	0			0	0		SignalP-NN(euk) (SIGNALP), tmhmm (TMHMM)
LCOR_00799.1	-1.3054	0.404609	6.27688	15.5134	FALSE	0.01592	translation repressor antiviral protein ski3	1379	20	0	47.6%	1	F:protein binding	0	IPR011990; IPR013026; IPR013105; IPR019734; PTHR15704 (PANTHER), PTHR15704:SF4 (PANTHER), PF13414 (PFAM), PF13424 (PFAM), PF13432 (PFAM), SSF48452 (SUPERFAMILY)
LCOR_00800.1	0.173218	1.12757	29.195	25.8919	FALSE	0.0396827	5-formyltetrahydrofolate cyclo-ligase	298	20	8.12741e-47	60.4%	3	F:ATP binding; P:folic acid-containing compound biosynthetic process; F:5-formyltetrahydrofolate cyclo-ligase activity	EC:6.3.3.2	IPR002698; IPR024185; PTHR23407 (PANTHER), SSF100950 (SUPERFAMILY)
LCOR_00801.1	1.29243	2.44939	19.9213	8.13317	TRUE	0.000659462	---NA---	68	0			0	0		tmhmm (TMHMM)
LCOR_00802.1	-Inf	0	0	0.0748806	FALSE	0.466756	hypothetical protein RO3G_03924	538	20	6.75499e-68	71.3%	0	0		no IPS match
LCOR_00803.1	-1.19287	0.437432	0.327286	0.748199	FALSE	0.522234	mitochondrial chaperone bcs1	556	20	8.25644e-130	55.05%	3	F:nucleoside-triphosphatase activity; F:ATP binding; P:mitochondrial respiratory chain complex III assembly	EC:3.6.1.15	IPR003593; IPR003959; IPR014851; IPR027243; IPR027417; G3DSA:3.40.50.300 (GENE3D), PTHR23070 (PANTHER), SignalP-NN(euk) (SIGNALP), tmhmm (TMHMM)
LCOR_00804.1	-0.587126	0.665668	3.74374	5.62403	FALSE	1	---NA---	146	0			0	0		no IPS match
LCOR_00805.1	-0.377754	0.769635	7.26037	9.43353	FALSE	0.842056	---NA---	104	0			0	0		no IPS match
LCOR_00806.1	-0.782852	0.581217	10.5948	18.2286	FALSE	0.587087	related to b56-delta regulatory subunit of protein phosphatase 2a	639	20	0	79.4%	4	C:protein phosphatase type 2A complex; P:signal transduction; F:protein phosphatase type 2A regulator activity; F:binding	0	IPR002554; IPR016024
LCOR_00807.1	-Inf	0	0	0.0194998	FALSE	1	vacuolar amino acid transporter 3	481	20	0	61.5%	2	C:integral to membrane; C:membrane		IPR013057; PTHR22950 (PANTHER), PTHR22950:SF9 (PANTHER), tmhmm (TMHMM)
LCOR_00808.1	-1.62133	0.325035	12.2919	37.8173	TRUE	0.00533064	---NA---	353	0			0	0		no IPS match
LCOR_00809.1	-0.748955	0.595035	14.4573	24.2965	FALSE	0.614076	cysteine proteinase	649	20	2.57887e-108	49.9%	2	F:ubiquitin thiolesterase activity; P:ubiquitin-dependent protein catabolic process	EC:3.1.2.15	IPR001394; IPR018200; PTHR24006 (PANTHER), SignalP-NN(euk) (SIGNALP), tmhmm (TMHMM), SSF54001 (SUPERFAMILY)
LCOR_00810.1	-1.11792	0.460757	2.5975	5.63747	FALSE	0.318661	aminoacylase 1-like protein 2	435	20	1.68261e-152	60.75%	2	P:metabolic process; F:hydrolase activity	0	IPR002933; IPR011650; IPR017144; IPR017439; G3DSA:3.40.630.10 (GENE3D), PTHR30575 (PANTHER), PTHR30575:SF0 (PANTHER), SSF53187 (SUPERFAMILY)
LCOR_00811.1	-0.112229	0.925158	24.1843	26.1407	FALSE	0.191139	phospholipid binding protein	750	20	1.42673e-76	67.75%	2	F:protein binding; F:phospholipid binding	0	IPR001452; IPR001660; IPR001715; IPR001849; IPR011510; IPR011993; IPR013761; G3DSA:2.30.30.40 (GENE3D), PTHR12752 (PANTHER), SSF50729 (SUPERFAMILY)
LCOR_00812.1	-0.761268	0.589978	7.48786	12.6918	FALSE	0.665128	hypothetical protein RO3G_09566	572	1	5.54304e-148	61.0%	1	F:protein binding	0	IPR001680; IPR001810; IPR015943; IPR017986; IPR019775; G3DSA:1.20.1280.50 (GENE3D), PTHR22844 (PANTHER), PF12937 (PFAM), SignalP-NN(euk) (SIGNALP)
LCOR_00813.1	-0.172612	0.887235	469.462	529.129	FALSE	0.286245	60s ribosomal protein l38	112	20	1.6646e-36	86.05%	3	F:structural constituent of ribosome; C:ribosome; P:translation	0	IPR002675
LCOR_00814.1	Inf	Inf	0.145651	0	FALSE	0.698654	---NA---	138	0			0	0		no IPS match
LCOR_00815.1	-1.31697	0.401377	23.3225	58.1062	FALSE	0.0286324	related to gef1 protein	1036	19	1.94065e-90	59.58%	3	F:Rho guanyl-nucleotide exchange factor activity; C:intracellular; P:regulation of Rho protein signal transduction	0	IPR000219; PTHR12673 (PANTHER), SSF50729 (SUPERFAMILY)
LCOR_00816.1	-0.655678	0.634777	110.506	174.087	FALSE	0.883096	---NA---	96	0			1	C:membrane	0	IPR005349; SignalP-NN(euk) (SIGNALP), tmhmm (TMHMM)
LCOR_00817.1	-0.448805	0.732649	51.5619	70.3773	FALSE	0.891008	beta-hexosaminidase 1	629	20	0	55.45%	2	P:carbohydrate metabolic process; F:beta-N-acetylhexosaminidase activity	EC:3.2.1.52	IPR013781; IPR015882; IPR015883; IPR017853; IPR025705; G3DSA:3.30.379.10 (GENE3D), PTHR22600 (PANTHER), SignalP-NN(euk) (SIGNALP), tmhmm (TMHMM), SSF55545 (SUPERFAMILY)
LCOR_00818.1	-0.787333	0.579414	11.2452	19.4079	FALSE	0.526943	pkinase-domain-containing protein	1066	20	2.11174e-150	64.75%	5	F:ATP binding; P:protein phosphorylation; F:protein binding; F:protein serine/threonine kinase activity; F:protein tyrosine kinase activity	EC:2.7.11.0; EC:2.7.10.0	IPR000719; IPR001245; IPR001660; IPR002290; IPR008271; IPR011009; IPR013761; IPR017441; IPR020635; IPR021129; G3DSA:1.10.510.10 (GENE3D), G3DSA:3.30.200.20 (GENE3D), PTHR24361 (PANTHER), PTHR24361:SF1 (PANTHER)
LCOR_00819.1	-1.46803	0.361474	5.36057	14.8297	FALSE	0.0126769	dna replication licensing factor mcm3	818	20	0	78.7%	5	F:DNA binding; F:ATP binding; F:DNA helicase activity; P:DNA-dependent DNA replication initiation; C:MCM complex	0	IPR001208; IPR003593; IPR008046; IPR012340; IPR018525; IPR027417; G3DSA:3.30.1640.10 (GENE3D), G3DSA:3.40.50.300 (GENE3D), PTHR11630 (PANTHER), PTHR11630:SF46 (PANTHER)
LCOR_00820.1	-1.27766	0.412465	3.31199	8.02974	FALSE	0.035771	phospholipase d1	1314	20	0	56.7%	5	F:protein binding; P:cell communication; F:phosphatidylinositol binding; F:catalytic activity; P:metabolic process	0	IPR001683; IPR001736; IPR001849; IPR015679; IPR025202; G3DSA:3.30.870.10 (GENE3D), SSF56024 (SUPERFAMILY)
LCOR_00821.1	0.157267	1.11517	2.92113	2.61944	FALSE	0.461025	---NA---	68	0			0	0		no IPS match
LCOR_00822.1	-0.0769798	0.94804	49.0189	51.7055	FALSE	0.25607	hypothetical protein RO3G_07237	542	6	4.74347e-154	51.5%	0	0		IPR026749; PTHR12459:SF0 (PANTHER), tmhmm (TMHMM)
LCOR_00823.1	-1.15971	0.447604	13.7893	30.8068	FALSE	0.0863296	potential dioxygenase	320	20	3.71952e-122	56.4%	3	F:iron ion binding; F:oxidoreductase activity; P:oxidation-reduction process	0	IPR002283; IPR005123; IPR026992; IPR027443; PTHR10209 (PANTHER), PTHR10209:SF54 (PANTHER), SSF51197 (SUPERFAMILY)
LCOR_00824.1	-0.509001	0.702709	24.3668	34.6756	FALSE	0.997612	related to mmt1-mitochondrial iron transport protein	410	1	6.38714e-26	64.0%	4	P:cation transport; F:cation transmembrane transporter activity; C:integral to membrane; P:transmembrane transport	0	IPR002524; IPR027469; IPR027470
LCOR_00825.1	-0.0861318	0.942045	87.5125	92.8963	FALSE	0.155983	smad fha domain-containing protein	325	20	2.86381e-95	63.55%	2	F:protein binding; F:zinc ion binding	0	IPR000253; IPR001841; IPR008984; IPR013083; PTHR22766 (PANTHER), PTHR22766:SF23 (PANTHER), SSF57850 (SUPERFAMILY)
LCOR_00826.1	0.173091	1.12747	23.9234	21.2186	FALSE	0.0306325	hemolysin-iii channel protein	329	20	1.46023e-74	60.4%	1	C:integral to membrane	0	IPR004254; PTHR20855:SF12 (PANTHER), tmhmm (TMHMM)
LCOR_00828.1	-1.01836	0.493678	7.01406	14.2078	FALSE	0.305165	---NA---	218	0			0	0		IPR018790; SignalP-NN(euk) (SIGNALP)
LCOR_00829.1	-0.933156	0.523711	9.95405	19.0067	FALSE	0.307227	nucleoporin seh1	431	20	5.41228e-91	70.7%	1	F:protein binding	0	IPR001680; IPR015943; IPR017986; IPR019775; IPR020472; PTHR11024 (PANTHER), PTHR11024:SF3 (PANTHER)
LCOR_00830.1	-1.09029	0.469667	5.47097	11.6486	FALSE	0.11065	sec7 domain containing protein	1217	20	0	52.75%	4	F:ARF guanyl-nucleotide exchange factor activity; P:regulation of ARF protein signal transduction; F:protein binding; F:phospholipid binding	0	IPR000904; IPR001849; IPR011993; IPR023394; PTHR10663 (PANTHER), PTHR10663:SF28 (PANTHER), SSF50729 (SUPERFAMILY)
LCOR_00831.1	-1.06957	0.476461	25.9552	54.4751	FALSE	0.220657	lyr motif-containing protein 5a	82	9	7.63652e-28	80.33%	0	0		IPR008011; PTHR21024 (PANTHER), PTHR21024:SF0 (PANTHER)
LCOR_00832.1	-0.356052	0.781299	534.831	684.54	FALSE	0.618416	40s ribosomal protein s23	145	20	2.79183e-96	95.25%	3	F:structural constituent of ribosome; P:translation; C:small ribosomal subunit	0	IPR005680; IPR006032; IPR012340
LCOR_00833.1	0.422004	1.33979	2.85627	2.13188	FALSE	0.235702	heat shock protein hsp20	150	3	5.44379e-27	62.0%	1	P:response to stress		IPR002068; IPR008978; IPR025164; G3DSA:2.60.40.790 (GENE3D), PTHR11527 (PANTHER), PTHR11527:SF15 (PANTHER)
LCOR_00834.1	0.616906	1.53358	38.8879	25.3576	TRUE	0.0004521	gtpase-activator protein for ras-like gtpase	2803	20	0	56.8%	4	F:GTPase activator activity; C:intracellular; P:regulation of small GTPase mediated signal transduction; F:binding	0	IPR001251; IPR001936; IPR008936; IPR016024; IPR023152; IPR025481; G3DSA:1.10.494.10 (GENE3D), PTHR10194 (PANTHER), PTHR10194:SF7 (PANTHER), PF13716 (PFAM)
LCOR_00835.1	-Inf	0	0	0.0444662	FALSE	1	bem46 family protein	193	20	2.77403e-63	69.65%	2	P:proteolysis; F:serine-type peptidase activity		G3DSA:3.40.50.1820 (GENE3D), PTHR12277 (PANTHER), PF12695 (PFAM), SSF53474 (SUPERFAMILY)
LCOR_00836.1	-1.55737	0.339769	2.17592	6.4041	FALSE	0.0364755	hypothetical protein RO3G_03396	349	1	7.27484e-42	67.0%	0	0		IPR019519; PTHR15641 (PANTHER)
LCOR_00839.1	-0.912916	0.531111	34.3934	64.7574	FALSE	0.313227	adaptor protein complex sigma subunit	141	20	1.01335e-74	89.4%	2	F:protein transporter activity; P:protein transport	0	IPR011012; IPR016635; IPR022775; G3DSA:3.30.450.60 (GENE3D), PTHR11753:SF5 (PANTHER), SignalP-NN(euk) (SIGNALP)
LCOR_00840.1	-1.63374	0.322252	17.7753	55.1595	TRUE	0.00131521	hypothetical protein RO3G_10607	6893	3	0	62.0%	0	0		IPR000772; G3DSA:2.80.10.50 (GENE3D), SignalP-NN(euk) (SIGNALP)
LCOR_00841.1	-2.6497	0.159353	0.302014	1.89525	FALSE	0.244198	---NA---	66	0			0	0		no IPS match
LCOR_00842.1	-0.562198	0.677269	41.1954	60.8257	FALSE	1	atp-dependent rna helicase dbp2	651	20	0	84.05%	3	F:nucleic acid binding; F:ATP binding; F:ATP-dependent helicase activity	0	IPR000629; IPR001650; IPR011545; IPR014001; IPR014014; IPR027417; G3DSA:3.40.50.300 (GENE3D), PTHR24031 (PANTHER), PTHR24031:SF1 (PANTHER)
LCOR_00844.1	-1.98069	0.253369	292.954	1156.23	TRUE	3.40934e-05	protein yop-1	186	20	1.14945e-79	62.7%	6	F:receptor activity; C:integral to membrane; C:membrane; F:molecular_function; P:biological_process; F:protein binding		IPR004345; tmhmm (TMHMM)
LCOR_00845.1	-0.38787	0.764257	16.6346	21.7658	FALSE	0.717623	ctp synthase	564	20	0	80.65%	2	F:CTP synthase activity; P:pyrimidine nucleotide biosynthetic process	EC:6.3.4.2	IPR004468; IPR017456; IPR017926; IPR027417; G3DSA:3.40.50.300 (GENE3D), G3DSA:3.40.50.880 (GENE3D), PTHR11550:SF0 (PANTHER), tmhmm (TMHMM), SSF52317 (SUPERFAMILY)
LCOR_00846.1	-0.509055	0.702683	1.04485	1.48695	FALSE	0.96788	---NA---	439	0			0	0		IPR022210
LCOR_00847.1	-0.414489	0.750285	24.1473	32.1842	FALSE	0.753423	upf0326 protein hag1	270	20	3.46409e-54	68.45%	0	0		IPR008580; PTHR12378 (PANTHER)
LCOR_00848.1	-0.856229	0.552394	18.6703	33.7988	FALSE	0.379099	cullin 1a	772	20	0	56.6%	3	P:ubiquitin-dependent protein catabolic process; C:cullin-RING ubiquitin ligase complex; F:ubiquitin protein ligase binding	0	IPR001373; IPR011991; IPR016158; IPR016159; IPR019559; G3DSA:1.20.1310.10 (GENE3D), G3DSA:4.10.1030.10 (GENE3D), PTHR11932 (PANTHER), PTHR11932:SF18 (PANTHER), SSF46785 (SUPERFAMILY)
LCOR_00849.1	-0.658787	0.633411	5.65065	8.92099	FALSE	0.818569	---NA---	583	0			1	F:protein binding	0	IPR001810; G3DSA:3.80.10.10 (GENE3D), PTHR23125 (PANTHER), SSF52047 (SUPERFAMILY)
LCOR_00851.1	-1.50327	0.352753	11.1906	31.7235	TRUE	0.00682171	multidrug resistance-associated protein 1-like	1375	20	3.53461e-175	50.35%	4	F:ATP binding; C:integral to membrane; P:transmembrane transport; F:ATPase activity	EC:3.6.1.3	IPR001140; IPR003439; IPR011527; IPR017940; IPR027417; G3DSA:1.20.1560.10 (GENE3D), G3DSA:3.40.50.300 (GENE3D), PTHR24223 (PANTHER), SignalP-NN(euk) (SIGNALP), tmhmm (TMHMM)
LCOR_00852.1	-1.91931	0.264381	8.10324	30.6498	TRUE	0.000344249	---NA---	273	0			1	C:integral to membrane	0	IPR006838; PTHR12242 (PANTHER), tmhmm (TMHMM)
LCOR_00853.1	-1.49486	0.354816	0.274421	0.773418	FALSE	0.406971	inorganic pyrophosphatase	336	20	7.22098e-88	62.4%	4	F:magnesium ion binding; F:inorganic diphosphatase activity; C:cytoplasm; P:phosphate-containing compound metabolic process	EC:3.6.1.1	IPR008162; PTHR10286:SF0 (PANTHER), SignalP-NN(euk) (SIGNALP)
LCOR_00854.1	0.717078	1.64385	1614.14	981.924	TRUE	0.000293148	l-arabinitol 4-dehydrogenase	361	20	1.85787e-155	67.9%	3	F:zinc ion binding; F:oxidoreductase activity; P:oxidation-reduction process	0	IPR002085; IPR002328; IPR011032; IPR013149; IPR013154; IPR016040; IPR020843; PTHR11695:SF38 (PANTHER), SSF51735 (SUPERFAMILY)
LCOR_00855.1	0.527965	1.44189	23.696	16.4339	TRUE	0.000658311	s-adenosyl-l-methionine-dependent trna: m5c-methyltransferase	737	20	0	59.6%	2	F:RNA binding; F:tRNA (cytosine-5-)-methyltransferase activity	EC:2.1.1.29	IPR001678; IPR018314; IPR023267; IPR023270; G3DSA:3.40.50.150 (GENE3D), PTHR22808 (PANTHER), PTHR22808:SF1 (PANTHER), SSF53335 (SUPERFAMILY)
LCOR_00856.1	1.96695	3.90942	4.18066	1.06938	FALSE	0.0100929	---NA---	68	0			0	0		no IPS match
LCOR_00857.1	-1.33815	0.395527	11.5844	29.2885	FALSE	0.01592	swirm-domain-containing protein	779	20	0	63.2%	4	F:zinc ion binding; F:chromatin binding; F:protein binding; F:DNA binding	0	IPR000433; IPR001005; IPR007526; IPR009057; IPR011991; IPR017884; PTHR12802 (PANTHER), PTHR12802:SF6 (PANTHER), SignalP-NN(euk) (SIGNALP)
LCOR_00858.1	1.61265	3.05814	1355.1	443.112	TRUE	2.18917e-07	---NA---	101	0			0	0		no IPS match
LCOR_00859.1	0.02584	1.01807	7.22449	7.09624	FALSE	0.361675	---NA---	121	0			0	0		no IPS match
LCOR_00860.1	0.14133	1.10292	16.2385	14.7232	FALSE	0.0262597	glycosyltransferase family 2 protein	700	20	0	61.75%	3	F:motor activity; F:ATP binding; C:myosin complex	0	IPR001609; IPR027417; PTHR13140 (PANTHER)
LCOR_00861.1	0.0838222	1.05982	25.1152	23.6976	FALSE	0.063603	williams-beuren syndrome critical region protein 22	283	20	3.28471e-150	73.4%	2	P:metabolic process; F:methyltransferase activity	EC:2.1.1.0	IPR013216; IPR022238; G3DSA:3.40.50.150 (GENE3D), PTHR12734 (PANTHER), PTHR12734:SF0 (PANTHER), SSF53335 (SUPERFAMILY)
LCOR_00862.1	-1.04377	0.485057	18.8027	38.7639	FALSE	0.230583	mitochondrial 37s ribosomal protein sws2	143	20	2.42612e-79	66.6%	4	F:RNA binding; F:structural constituent of ribosome; C:ribosome; P:translation	0	IPR001892; IPR010979; IPR027437; G3DSA:1.10.8.50 (GENE3D), PTHR10871:SF1 (PANTHER)
LCOR_00863.1	-1.00249	0.499138	15.6692	31.3924	FALSE	0.212721	transcription initiation factor tfiid 55 kda subunit	365	16	1.3991e-44	68.81%	2	C:transcription factor TFIID complex; P:transcription initiation from RNA polymerase II promoter	0	IPR006751; PTHR12228 (PANTHER), PTHR12228:SF0 (PANTHER)
LCOR_00864.1	-1.63227	0.32258	3.40886	10.5675	TRUE	0.0014783	rna-directed rna polymerase	1177	20	0	47.6%	1	F:RNA-directed RNA polymerase activity	EC:2.7.7.48	IPR007855
LCOR_00865.1	1.03601	2.05055	106.633	52.0024	TRUE	0.00109576	---NA---	107	0			0	0		no IPS match
LCOR_00866.1	0.837539	1.787	930.709	520.822	TRUE	8.0058e-05	---NA---	361	0			1	F:protein binding	0	IPR000108; IPR001452; G3DSA:2.30.30.40 (GENE3D), PTHR22820 (PANTHER)
LCOR_00867.1	-0.204179	0.868033	273.097	314.616	FALSE	0.31471	---NA---	121	0			2	F:eukaryotic initiation factor 4E binding; P:negative regulation of translational initiation	0	IPR008606; PTHR12669:SF3 (PANTHER)
LCOR_00868.1	0.244709	1.18485	8.7292	7.36732	FALSE	0.0503278	---NA---	628	0			0	0		IPR016196; G3DSA:1.20.1250.20 (GENE3D), SignalP-NN(euk) (SIGNALP), tmhmm (TMHMM)
LCOR_00869.1	-0.395613	0.760166	1033.03	1358.95	FALSE	0.70533	60s ribosomal protein l37a	92	20	2.58989e-42	91.4%	3	F:structural constituent of ribosome; C:ribosome; P:translation	0	IPR002674; IPR011331; IPR011332; PTHR11517 (PANTHER)
LCOR_00870.1	-1.41525	0.374944	122.822	327.574	FALSE	0.0214753	hypothetical protein RO3G_13436	119	2	1.43875e-30	94.5%	1	F:ubiquinol-cytochrome-c reductase activity	EC:1.10.2.2	IPR003422; IPR023184
LCOR_00871.1	-0.302912	0.810614	38.4174	47.3929	FALSE	0.469904	dcn1-like protein 2	596	20	3.32769e-71	60.95%	3	C:THO complex part of transcription export complex; P:mRNA processing; F:protein binding	0	IPR005176; IPR008501; IPR009060; IPR014764; G3DSA:1.10.8.10 (GENE3D), PTHR12281:SF0 (PANTHER)
LCOR_00872.1	-1.53927	0.344059	333.592	969.578	TRUE	0.00792572	---NA---	299	0			0	0		SignalP-NN(euk) (SIGNALP)
LCOR_00873.1	0.49551	1.40982	75.7632	53.7397	TRUE	0.000943453	hypothetical protein RO3G_02242	468	1	1.2442e-97	52.0%	4	P:intracellular signal transduction; F:protein kinase C activity; F:ATP binding; P:protein phosphorylation	EC:2.7.11.13	IPR002219; IPR010482; IPR015727; G3DSA:3.30.60.20 (GENE3D), PTHR22968:SF0 (PANTHER), tmhmm (TMHMM), SSF57889 (SUPERFAMILY)
LCOR_00874.1	0.03625	1.02544	6.41958	6.26029	FALSE	0.348751	---NA---	626	0			3	F:sequence-specific DNA binding transcription factor activity; F:zinc ion binding; F:sequence-specific DNA binding	0	IPR000679; IPR013088; IPR013860; PTHR10071 (PANTHER), SSF57716 (SUPERFAMILY)
LCOR_00875.1	0.514785	1.42878	55.3329	38.7274	TRUE	0.000584722	glycosyltransferase family 15 protein	377	20	8.33963e-138	73.0%	3	F:mannosyltransferase activity; P:protein glycosylation; C:membrane	0	IPR002685; G3DSA:3.90.550.10 (GENE3D), PTHR31121 (PANTHER), SignalP-NN(euk) (SIGNALP), tmhmm (TMHMM), SSF53448 (SUPERFAMILY)
LCOR_00876.1	-1.4214	0.37335	63.6541	170.494	FALSE	0.0103405	major facilitator superfamily transporter	524	20	0	57.3%	2	C:integral to membrane; P:transmembrane transport	0	IPR011701; IPR016196; IPR020846; G3DSA:1.20.1250.20 (GENE3D), PTHR24003 (PANTHER), PTHR24003:SF78 (PANTHER), tmhmm (TMHMM)
LCOR_00877.1	0.774508	1.71061	32.5721	19.0412	TRUE	3.16966e-05	hybrid signal transduction histidine kinase j	1681	20	0	77.2%	6	F:two-component response regulator activity; P:two-component signal transduction system (phosphorelay); F:ATP binding; C:integral to membrane; F:two-component sensor activity; P:phosphorylation	0	IPR001789; IPR003594; IPR003660; IPR003661; IPR004358; IPR005467; IPR009082; IPR011006; G3DSA:3.40.50.2300 (GENE3D), PTHR24423 (PANTHER), PTHR24423:SF360 (PANTHER)
LCOR_00878.1	-0.331289	0.794826	4.51757	5.68372	FALSE	0.633711	rab gtpase activator	834	20	1.50835e-110	59.45%	3	F:Rab GTPase activator activity; C:intracellular; P:regulation of Rab GTPase activity	0	IPR000195; G3DSA:1.10.8.270 (GENE3D), PTHR22957 (PANTHER)
LCOR_00879.1	-0.850804	0.554476	6.12735	11.0507	FALSE	0.478268	mus38-like protein	889	20	0	59.25%	3	F:DNA binding; F:endonuclease activity; P:DNA repair	0	IPR006166; IPR006167; IPR010994; IPR011335; IPR020819; PTHR10150 (PANTHER)
LCOR_00880.1	-1.15136	0.4502	0.238413	0.529572	FALSE	0.917997	---NA---	131	0			0	0		no IPS match
LCOR_00881.1	-1.01298	0.49552	18.2963	36.9234	FALSE	0.280878	hypothetical protein TRAVEDRAFT_163755	135	17	4.87982e-35	66.76%	0	0		PTHR13420 (PANTHER)
LCOR_00882.1	-0.126209	0.916236	0.399686	0.436226	FALSE	0.810826	---NA---	331	0			0	0		tmhmm (TMHMM)
LCOR_00883.1	-0.762553	0.589452	41.6529	70.6638	FALSE	0.624715	ethanolamine kinase 2	370	20	3.96669e-162	57.85%	2	F:kinase activity; P:glycerophospholipid biosynthetic process	0	IPR011009; IPR026712; G3DSA:3.90.1200.10 (GENE3D), PF01633 (PFAM)
LCOR_00884.1	-0.989161	0.50377	81.2559	161.295	FALSE	0.319034	probable het-c2 protein	196	20	5.75536e-90	69.9%	4	C:cytoplasm; F:glycolipid transporter activity; P:glycolipid transport; F:glycolipid binding	0	IPR014830; PTHR10219 (PANTHER)
LCOR_00885.1	0.259036	1.19668	79.5185	66.4494	FALSE	0.0152877	1-phosphatidylinositol-4-phosphate 5-kinase	826	20	7.58219e-163	75.45%	2	F:phosphatidylinositol phosphate kinase activity; P:phosphatidylinositol metabolic process	0	IPR002498; IPR016034; IPR023610; IPR027483; IPR027484; PTHR23086:SF3 (PANTHER), SSF56104 (SUPERFAMILY)
LCOR_00886.1	0.463065	1.37847	57.1583	41.4651	TRUE	0.00130095	---NA---	509	0			0	0		IPR018617; SignalP-NN(euk) (SIGNALP), tmhmm (TMHMM)
LCOR_00887.1	0.583033	1.498	388.79	259.54	TRUE	0.000963965	hypothetical protein RO3G_12117	613	3	8.50112e-51	54.33%	1	F:protein binding	0	IPR000048
LCOR_00888.1	-1.23811	0.423927	2.96683	6.99846	FALSE	0.137162	gtp-binding protein era	443	20	6.48196e-56	58.55%	3	F:RNA binding; F:GTP binding; C:intracellular	0	IPR004044; IPR005225; IPR005662; IPR006073; IPR009019; IPR015946; IPR027417; G3DSA:3.40.50.300 (GENE3D), PTHR11649 (PANTHER), PTHR11649:SF3 (PANTHER)
LCOR_00889.1	-0.592359	0.663258	8.52583	12.8545	FALSE	1	---NA---	692	0			2	F:protein binding; F:calcium ion binding	0	IPR000261; IPR001452; IPR011992; G3DSA:2.30.30.40 (GENE3D), PTHR10321 (PANTHER), SSF47473 (SUPERFAMILY)
LCOR_00890.1	-1.10004	0.466503	27.276	58.4692	FALSE	0.292279	---NA---	69	0			0	0		PS51257 (PROFILE), SignalP-NN(euk) (SIGNALP), tmhmm (TMHMM)
LCOR_00891.1	-1.23244	0.425597	19.8284	46.5897	FALSE	0.0758378	ccr4-not complex subunit caf16	285	20	1.47692e-127	69.65%	2	F:ATP binding; F:ATPase activity	EC:3.6.1.3	IPR003439; IPR003593; IPR027417; G3DSA:3.40.50.300 (GENE3D), PTHR12847 (PANTHER)
LCOR_00892.1	-1.44473	0.36736	111.837	304.434	TRUE	0.00611064	ubiquitin-conjugating enzyme	136	20	1.72873e-62	83.95%	1	F:acid-amino acid ligase activity	EC:6.3.2.0	IPR000608; IPR016135; PTHR24067 (PANTHER), PTHR24067:SF46 (PANTHER), SM00212 (SMART)
LCOR_00893.1	-0.125605	0.91662	2.54558	2.77714	FALSE	0.396403	---NA---	1190	0			0	0		no IPS match
LCOR_00895.1	-0.238394	0.847688	0.828258	0.977078	FALSE	0.674952	map microtubule affinity-regulating kinase 4	650	20	3.64678e-138	63.7%	4	F:ATP binding; P:protein phosphorylation; F:protein serine/threonine kinase activity; F:protein tyrosine kinase activity	EC:2.7.11.0; EC:2.7.10.0	IPR000719; IPR002290; IPR008271; IPR011009; IPR017441; IPR020635; G3DSA:1.10.510.10 (GENE3D), G3DSA:3.30.200.20 (GENE3D), PTHR24343 (PANTHER)
LCOR_00896.1	0.399293	1.31886	283.561	215.004	FALSE	0.0340933	---NA---	163	0			0	0		no IPS match
LCOR_00897.1	-1.34037	0.39492	2.88389	7.30248	FALSE	0.0662091	---NA---	575	0			0	0		IPR002885; PTHR24015 (PANTHER), PTHR24015:SF0 (PANTHER), SignalP-NN(euk) (SIGNALP)
LCOR_00898.1	0.0467965	1.03297	26.7716	25.9172	FALSE	0.0561523	f5 8 type c domain protein	576	20	3.23537e-63	45.65%	0	0		IPR011050; IPR012334
LCOR_00899.1	0.0762173	1.05425	0.299766	0.28434	FALSE	0.889038	---NA---	135	0			0	0		no IPS match
LCOR_00900.1	1.60883	3.05005	115.52	37.8746	TRUE	9.35839e-11	---NA---	341	0			0	0		PTHR12231 (PANTHER), tmhmm (TMHMM)
LCOR_00901.1	-0.45537	0.729323	4.95426	6.79295	FALSE	0.815634	related to bre4-protein involved in endocytosis	1121	20	0	51.7%	1	P:response to aluminum ion		IPR018820; IPR018823; PF13515 (PFAM), tmhmm (TMHMM)
LCOR_00902.1	-1.62698	0.323765	19.7133	60.8877	TRUE	0.00217749	hypothetical protein RO3G_05788	129	1	5.68699e-51	82.0%	0	0		IPR010357; IPR012336
LCOR_00903.1	0.064191	1.0455	193.813	185.379	FALSE	0.0728715	short-chain dehydrogenase	317	20	1.00647e-149	65.95%	2	P:metabolic process; F:oxidoreductase activity	0	IPR002198; IPR002347; IPR016040; IPR020904; PTHR24322 (PANTHER), SignalP-NN(euk) (SIGNALP), tmhmm (TMHMM), SSF51735 (SUPERFAMILY)
LCOR_00904.1	-0.0591557	0.959826	9.75276	10.161	FALSE	0.281767	---NA---	181	0			0	0		SignalP-NN(euk) (SIGNALP), tmhmm (TMHMM)
LCOR_00905.1	-0.187487	0.878134	4.93568	5.62064	FALSE	0.552063	hypothetical protein RO3G_03208	419	16	1.15661e-78	67.94%	0	0		no IPS match
LCOR_00906.1	-0.705804	0.613101	28.7695	46.9247	FALSE	0.751428	---NA---	219	0			0	0		IPR013957; PTHR31077 (PANTHER), PTHR31077:SF0 (PANTHER)
LCOR_00907.1	-0.355682	0.7815	5.9263	7.58323	FALSE	0.79237	bystin	430	20	0	70.5%	7	P:ribosome biogenesis; C:nucleolus; C:nucleus; C:cytoplasm; P:female pregnancy; C:intracellular membrane-bounded organelle; P:cell adhesion		IPR007955; PTHR12821:SF0 (PANTHER)
LCOR_00908.1	-0.392079	0.762031	14.2879	18.7497	FALSE	0.698654	hypothetical protein RO3G_05567	1194	1	6.42356e-77	57.0%	4	F:protein kinase activity; F:ATP binding; P:protein phosphorylation; F:protein binding	0	IPR000719; IPR002290; IPR006652; IPR011009; IPR011043; IPR015915; G3DSA:1.10.510.10 (GENE3D), G3DSA:3.30.200.20 (GENE3D), PTHR24362 (PANTHER), PF13415 (PFAM), SignalP-NN(euk) (SIGNALP), tmhmm (TMHMM)
LCOR_00910.1	-0.879496	0.543557	287.248	528.459	FALSE	0.401664	eukaryotic translation initiation factor 1	112	20	1.53656e-53	78.1%	2	F:translation initiation factor activity; P:translational initiation	0	IPR001950; IPR005874; PTHR10388 (PANTHER)
LCOR_00911.1	-1.12726	0.457786	3.41525	7.46037	FALSE	0.149759	hypothetical protein RO3G_11302	671	1	2.01518e-73	57.0%	3	F:sequence-specific DNA binding transcription factor activity; F:zinc ion binding; F:sequence-specific DNA binding	0	IPR000679; IPR013088; PTHR10071 (PANTHER), PTHR10071:SF113 (PANTHER), SSF57716 (SUPERFAMILY)
LCOR_00912.1	-1.17128	0.444028	0.291086	0.655557	FALSE	0.657288	grainyhead-like protein 2 homolog	494	20	1.83649e-58	55.7%	0	0		IPR007604; PTHR11037 (PANTHER)
LCOR_00913.1	-1.11209	0.462625	11.2006	24.211	FALSE	0.0844374	---NA---	883	0			0	0		IPR018545
LCOR_00914.1	0.130157	1.09441	55.0066	50.2613	FALSE	0.041374	rho gtpase activator	1055	20	0	59.35%	3	C:intracellular; P:signal transduction; F:zinc ion binding	0	IPR000198; IPR001781; IPR008936; PTHR24215 (PANTHER), PTHR24215:SF10 (PANTHER), SSF57716 (SUPERFAMILY)
LCOR_00915.1	-0.115087	0.923327	48.4078	52.4276	FALSE	0.229802	clavaminate synthase-like protein	615	20	2.34611e-80	47.2%	1	F:protein binding	0	IPR003347; G3DSA:2.60.120.650 (GENE3D), PTHR12549 (PANTHER), SSF51197 (SUPERFAMILY)
LCOR_00916.1	-0.5952	0.661953	4.53669	6.85349	FALSE	1	PREDICTED: predicted protein-like	366	1	4.4088e-27	46.0%	1	F:protein binding	0	IPR017986
LCOR_00917.1	0.475214	1.39012	11.5166	8.28459	TRUE	0.00400926	feline leukemia virus subgroup c receptor-related protein 2-like	463	16	1.77761e-117	48.88%	2	C:integral to membrane; P:transmembrane transport	0	IPR011701; IPR016196; IPR020846; G3DSA:1.20.1250.20 (GENE3D), PTHR10924 (PANTHER), SignalP-NN(euk) (SIGNALP), tmhmm (TMHMM)
LCOR_00918.1	-0.202263	0.869186	16.2711	18.7199	FALSE	0.374968	thioesterase thiol ester dehydrase-isomerase	487	20	0	61.2%	2	F:hydrolase activity; F:acetyl-CoA hydrolase activity		G3DSA:3.10.129.10 (GENE3D), PTHR12655 (PANTHER), PTHR12655:SF0 (PANTHER), SSF54637 (SUPERFAMILY)
LCOR_00919.1	-0.250818	0.84042	69.1264	82.2523	FALSE	0.366632	ddp1 protein	157	17	3.43413e-34	60.65%	1	F:hydrolase activity	0	IPR000086; IPR015797; IPR020084; PTHR12629 (PANTHER), PTHR12629:SF0 (PANTHER)
LCOR_00920.1	0.153177	1.11202	19.3286	17.3816	FALSE	0.0330001	nucleoporin	1583	20	0	47.75%	4	C:nuclear pore; P:nucleocytoplasmic transport; F:structural constituent of nuclear pore; P:transmembrane transport	0	IPR004870; IPR007187; IPR011701; IPR014908; IPR016196; IPR020846; G3DSA:1.20.1250.20 (GENE3D), tmhmm (TMHMM)
LCOR_00921.1	-0.407702	0.753823	2.63668	3.49774	FALSE	0.899349	---NA---	318	0			0	0		no IPS match
LCOR_00922.1	Inf	Inf	0.12397	0	FALSE	1	---NA---	90	0			0	0		no IPS match
LCOR_00923.1	-0.919265	0.528778	21.2285	40.1462	FALSE	0.289499	hypothetical protein RO3G_04999	352	9	9.08124e-48	49.0%	0	0		IPR021362; SignalP-NN(euk) (SIGNALP), tmhmm (TMHMM)
LCOR_00924.1	1.75871	3.38396	0.082256	0.0243076	FALSE	0.606577	hypothetical protein RO3G_17054	354	1	2.28091e-27	58.0%	0	0		tmhmm (TMHMM)
LCOR_00925.1	-0.887306	0.540623	5.14387	9.51471	FALSE	0.388177	camk camkl kin1 protein kinase	936	20	0	72.15%	4	F:ATP binding; P:protein phosphorylation; F:protein serine/threonine kinase activity; F:protein tyrosine kinase activity	EC:2.7.11.0; EC:2.7.10.0	IPR000719; IPR001772; IPR002290; IPR008271; IPR011009; IPR017441; IPR020635; G3DSA:1.10.510.10 (GENE3D), G3DSA:3.30.200.20 (GENE3D), G3DSA:3.30.310.80 (GENE3D), PTHR24343 (PANTHER), PTHR24343:SF47 (PANTHER)
LCOR_00926.1	-1.09444	0.468318	25.7899	55.0691	FALSE	0.105624	alpha beta-hydrolase	411	20	1.30695e-58	53.3%	2	F:hydrolase activity; P:metabolic process		G3DSA:3.40.50.1820 (GENE3D), PTHR12277 (PANTHER), PF12695 (PFAM), tmhmm (TMHMM), SSF53474 (SUPERFAMILY)
LCOR_00927.1	-2.696	0.15432	4.99786	32.3864	TRUE	7.05925e-10	methyltransferase type 11	493	20	1.56817e-57	53.35%	4	F:methyltransferase activity; F:transferase activity; P:metabolic process; P:methylation		G3DSA:3.40.50.150 (GENE3D), PTHR10108 (PANTHER), PF13489 (PFAM), SSF53335 (SUPERFAMILY)
LCOR_00928.1	-2.77389	0.14621	1.23843	8.47026	TRUE	8.37264e-05	---NA---	262	0			2	F:sequence-specific DNA binding transcription factor activity; F:sequence-specific DNA binding	0	IPR004827; G3DSA:1.20.5.170 (GENE3D), PTHR23334 (PANTHER)
LCOR_00929.1	-0.312617	0.80518	42.3839	52.639	FALSE	0.504288	related to adiponectin receptor 1	184	20	1.17969e-54	63.5%	4	C:endoplasmic reticulum; C:integral to membrane; P:sterol metabolic process; F:cholestenol delta-isomerase activity	EC:5.3.3.5	IPR007905; PTHR10742 (PANTHER), PTHR10742:SF26 (PANTHER), SignalP-NN(euk) (SIGNALP), tmhmm (TMHMM)
LCOR_00930.1	-0.636999	0.643049	364.419	566.704	FALSE	0.913496	40s ribosomal protein s23	145	20	2.79183e-96	95.25%	3	F:structural constituent of ribosome; P:translation; C:small ribosomal subunit	0	IPR005680; IPR006032; IPR012340
LCOR_00933.1	-0.721442	0.606491	12.8027	21.1094	FALSE	0.68324	rrna processing protein	470	20	0	66.6%	1	F:protein binding	0	IPR001680; IPR015943; IPR017986; IPR019775; IPR020472; PTHR14091 (PANTHER)
LCOR_00934.1	-0.873847	0.54569	6.46633	11.8498	FALSE	0.561384	hypothetical protein RO3G_11557	261	1	6.5472e-37	60.0%	0	0		no IPS match
LCOR_00935.1	-2.27274	0.206937	0.326814	1.57929	TRUE	0.00844347	---NA---	769	0			0	0		no IPS match
LCOR_00937.1	1.49408	2.81683	0.291445	0.103466	FALSE	0.282161	glycoside hydrolase family 16 protein	347	20	3.61009e-88	53.6%	1	P:carbohydrate metabolic process	0	IPR000757; IPR008264; IPR008985; IPR013320; PTHR31910 (PANTHER), SignalP-NN(euk) (SIGNALP), tmhmm (TMHMM
LCOR_00938.1	-0.816308	0.567893	17.1242	30.1539	FALSE	0.529601	aspartyl glutamyl-trna amidotransferase subunit b	517	20	1.92323e-152	65.95%	1	F:ligase activity	0	IPR003789; IPR004413; IPR006075; IPR017958; IPR017959; IPR018027; SSF55931 (SUPERFAMILY)
LCOR_00939.1	0.688163	1.61123	101.91	63.2496	TRUE	0.00018924	hypothetical protein RO3G_01351	260	4	6.94203e-28	85.25%	2	F:zinc ion binding; F:nucleic acid binding	0	IPR007087; IPR013087
LCOR_00940.1	-0.733434	0.601471	59.4689	98.8724	FALSE	0.691017	---NA---	116	0			0	0		no IPS match
LCOR_00941.1	-0.573082	0.672179	0.12509	0.186096	FALSE	1	---NA---	339	0			3	F:sequence-specific DNA binding transcription factor activity; F:zinc ion binding; F:sequence-specific DNA binding	0	IPR000679; IPR013088; PTHR10071 (PANTHER), PTHR10071:SF124 (PANTHER), SSF57716 (SUPERFAMILY)
LCOR_00942.1	0.326527	1.25399	14.9943	11.9573	FALSE	0.107325	---NA---	81	0			0	0		IPR008462
LCOR_00943.1	-0.616186	0.652394	7.62642	11.6899	FALSE	0.991455	---NA---	459	0			2	P:protein targeting to Golgi; F:protein binding	0	IPR000237
LCOR_00944.1	-1.10651	0.464416	7.53281	16.22	FALSE	0.095725	microtubule associated protein	2190	20	0	64.85%	1	F:binding	0	IPR011989; IPR016024; IPR024395; PTHR12609 (PANTHER), PTHR12609:SF0 (PANTHER)
LCOR_00945.1	-1.31263	0.402586	0.83158	2.0656	FALSE	0.240193	grainyhead-like protein 2 homolog	468	12	1.21193e-60	56.25%	3	C:cytoplasm; P:keratinocyte development; P:integument development		IPR007604; PTHR11037 (PANTHER), SignalP-NN(euk) (SIGNALP), tmhmm (TMHMM)
LCOR_00946.1	-1.4944	0.354929	0.141111	0.397575	FALSE	0.173049	p-loop containing nucleoside triphosphate hydrolase protein	1529	20	0	53.75%	4	F:ATP binding; C:integral to membrane; P:transmembrane transport; F:ATPase activity	EC:3.6.1.3	IPR001140; IPR003439; IPR003593; IPR011527; IPR017871; IPR017940; IPR027417; G3DSA:1.20.1560.10 (GENE3D), G3DSA:3.40.50.300 (GENE3D), PTHR24223 (PANTHER), tmhmm (TMHMM)
LCOR_00947.1	-1.66636	0.315048	164.143	521.011	TRUE	0.000928688	atp synthase f1 beta subunit	517	20	0	91.6%	4	F:ATP binding; P:ATP hydrolysis coupled proton transport; F:nucleoside-triphosphatase activity; P:ATP synthesis coupled proton transport	EC:3.6.1.15	IPR000194; IPR000793; IPR003593; IPR004100; IPR005722; IPR020003; IPR024034; IPR027417; G3DSA:2.40.10.170 (GENE3D), G3DSA:3.40.50.300 (GENE3D), PTHR15184 (PANTHER)
LCOR_00948.1	-0.669793	0.628597	411.595	654.784	FALSE	0.845194	probable gtpase rab7 protein	207	20	7.6172e-136	89.45%	8	F:GTP binding; P:small GTPase mediated signal transduction; F:GTPase activity; P:GTP catabolic process; P:intracellular protein transport; P:nucleocytoplasmic transport; C:intracellular; C:membrane	0	IPR001806; IPR002041; IPR003578; IPR003579; IPR005225; IPR020849; IPR027417; G3DSA:3.40.50.300 (GENE3D), PTHR24073 (PANTHER), PTHR24073:SF57 (PANTHER), PS51419 (PROFILE)
LCOR_00949.1	-1.46643	0.361878	101.24	279.762	TRUE	0.00488511	nadh-ubiquinone oxidoreductase subunit	133	20	5.10399e-55	65.5%	3	F:NADH dehydrogenase (ubiquinone) activity; F:electron carrier activity; C:membrane	EC:1.6.5.3	IPR007763; PTHR12910:SF0 (PANTHER)
LCOR_00950.1	-1.00621	0.497852	10.4261	20.9422	FALSE	0.201618	---NA---	473	0			0	0		no IPS match
LCOR_00951.1	-0.936488	0.522503	22.2379	42.5602	FALSE	0.308719	subunit of both the 4 histone h4 acetyltransferase complex and the swr1 complex	218	20	3.70583e-78	62.2%	1	C:nucleus	0	IPR005033
LCOR_00952.1	-1.30311	0.405251	34.1706	84.3196	FALSE	0.0530269	---NA---	84	0			3	P:mitotic spindle organization in nucleus; C:DASH complex; C:mitotic spindle	0	IPR013958
LCOR_00953.1	-1.4256	0.372264	167.651	450.356	FALSE	0.0155827	hypothetical protein RO3G_06683	308	1	7.06585e-74	59.0%	0	0		IPR000772
LCOR_00954.1	-1.22796	0.426921	38.554	90.307	FALSE	0.0430967	arsenical pump-driving atpase	331	20	0	88.05%	2	F:ATP binding; F:ATPase activity	EC:3.6.1.3	IPR016300; IPR025723; IPR027417; G3DSA:3.40.50.300 (GENE3D), PTHR10803:SF0 (PANTHER)
LCOR_00955.1	-1.57035	0.336726	3.11182	9.2414	TRUE	0.00321483	protein transporter sec24	977	20	0	75.2%	5	F:protein binding; P:intracellular protein transport; P:ER to Golgi vesicle-mediated transport; F:zinc ion binding; C:COPII vesicle coat	0	IPR002035; IPR006895; IPR006896; IPR006900; IPR007123; IPR012990; G3DSA:3.40.20.10 (GENE3D), PTHR13803 (PANTHER), PTHR13803:SF0 (PANTHER), SSF53300 (SUPERFAMILY), SSF81995 (SUPERFAMILY), SSF82754 (SUPERFAMILY)
LCOR_00957.1	-0.259255	0.835519	5.77922	6.91692	FALSE	0.779721	---NA---	73	0			0	0		no IPS match
LCOR_00958.1	0.81612	1.76066	23.201	13.1774	TRUE	2.28102e-05	---NA---	453	0			0	0		IPR013941
LCOR_00959.1	0.0687712	1.04882	96.7347	92.2317	FALSE	0.0655479	nucleoporin nup189	931	20	8.46123e-53	63.3%	2	C:nuclear pore; P:transport	0	IPR007230; G3DSA:3.30.1610.10 (GENE3D), PTHR23198 (PANTHER)
LCOR_00960.1	-0.940512	0.521048	33.7422	64.7584	FALSE	0.290616	protein efr3	813	20	1.88327e-139	46.45%	0	0		PTHR12444 (PANTHER)
LCOR_00961.1	2.13534	4.39341	11.3729	2.58862	TRUE	1.86665e-05	---NA---	230	0			0	0		SignalP-NN(euk) (SIGNALP), tmhmm (TMHMM)
LCOR_00963.1	-0.997503	0.500866	21.8248	43.5741	FALSE	0.209872	hypothetical protein RO3G_02218	243	20	1.49754e-65	57.55%	0	0		no IPS match
LCOR_00964.1	0.901868	1.86848	391.454	209.503	TRUE	5.21398e-05	---NA---	106	0			0	0		no IPS match
LCOR_00965.1	0.694307	1.61811	60.2448	37.2316	TRUE	0.000163029	lns2-domain-containing protein	1052	20	0	75.7%	0	0		IPR007651; IPR013209; IPR023214; IPR026058
LCOR_00966.1	-1.20568	0.433565	9.74468	22.4757	FALSE	0.14793	---NA---	148	0			0	0		no IPS match
LCOR_00967.1	-0.931663	0.524254	22.5742	43.0597	FALSE	0.445613	---NA---	73	0			0	0		no IPS match
LCOR_00968.1	-1.35503	0.390926	0.0423617	0.108362	FALSE	1	---NA---	265	0			0	0		no IPS match
LCOR_00969.1	-0.599482	0.659991	12.9636	19.642	FALSE	0.953098	hypothetical protein RO3G_13524	3028	5	1.05464e-167	59.6%	2	F:protein binding; P:cell cycle arrest	0	IPR001715; IPR003108; PTHR11915 (PANTHER), PTHR11915:SF65 (PANTHER), SSF46966 (SUPERFAMILY)
LCOR_00970.1	Inf	Inf	0.112712	0	FALSE	0.468177	---NA---	198	0			0	0		SignalP-NN(euk) (SIGNALP)
LCOR_00972.1	-0.730048	0.602884	26.9026	44.6232	FALSE	0.703548	per1-like protein	316	20	1.26461e-92	61.0%	0	0		IPR007217; PTHR13148:SF0 (PANTHER), PS51257 (PROFILE), SignalP-NN(euk) (SIGNALP), tmhmm (TMHMM)
LCOR_00973.1	-1.09904	0.466829	14.203	30.4244	FALSE	0.116005	cwt1 transcription factor	431	20	0	71.4%	3	F:sequence-specific DNA binding RNA polymerase II transcription factor activity; C:nucleus; F:zinc ion binding	0	IPR001138; PTHR31986 (PANTHER)
LCOR_00974.1	-1.31924	0.400745	3.13875	7.83229	FALSE	0.112646	hypothetical protein RO3G_00363	309	1	5.07653e-54	58.0%	0	0		IPR009737; IPR012336; PTHR31902 (PANTHER)
LCOR_00976.1	0.0625655	1.04432	2.52068	2.4137	FALSE	0.606577	---NA---	78	0			0	0		no IPS match
LCOR_00977.1	-4.85313	0.0345989	0.0749457	2.16613	TRUE	7.23985e-07	---NA---	389	0			0	0		IPR010730
LCOR_00978.1	0.706062	1.63135	51.407	31.512	TRUE	0.000180935	gamma-glutamyltranspeptidase	597	20	0	64.0%	2	F:gamma-glutamyltransferase activity; P:glutathione metabolic process	EC:2.3.2.2	IPR000101; SignalP-NN(euk) (SIGNALP), tmhmm (TMHMM), SSF56235 (SUPERFAMILY)
LCOR_00979.1	-0.807476	0.571381	20.874	36.5326	FALSE	0.60479	histone-fold-containing protein	141	20	1.63558e-69	83.4%	5	C:intracellular; F:sequence-specific DNA binding; F:protein heterodimerization activity; F:transcription cofactor activity; P:regulation of transcription from RNA polymerase II promoter	0	IPR003958; IPR009072; IPR027113; PTHR11064 (PANTHER)
LCOR_00980.1	-0.527021	0.693986	10.6707	15.3759	FALSE	1	forkhead box protein k1	556	20	1.78983e-67	68.35%	3	F:protein binding; F:sequence-specific DNA binding transcription factor activity; F:sequence-specific DNA binding	0	IPR000253; IPR001766; IPR008984; IPR011991; IPR018122; PTHR11829 (PANTHER), PTHR11829:SF50 (PANTHER), SSF46785 (SUPERFAMILY)
LCOR_00981.1	0.21926	1.16414	38.5129	33.0828	FALSE	0.0144736	hypothetical protein RO3G_04377	611	7	4.90956e-129	60.43%	0	0		IPR009449; PTHR14430 (PANTHER)
LCOR_00982.1	0.29682	1.22843	21.9076	17.8337	FALSE	0.0446028	---NA---	108	0			0	0		no IPS match
LCOR_00983.1	-1.02333	0.491981	29.4628	59.886	FALSE	0.19565	nucleolar protein nop56	500	20	0	82.6%	5	F:molecular_function; C:ribonucleoprotein complex; P:ribosome biogenesis; C:nucleolus; C:nucleus		IPR002687; IPR012974; IPR012976; PTHR10894 (PANTHER), SSF89124 (SUPERFAMILY)
LCOR_00984.1	-1.06592	0.477668	544.456	1139.82	FALSE	0.193554	---NA---	69	0			0	0		no IPS match
LCOR_00985.1	-1.17842	0.441835	15.049	34.0602	FALSE	0.0588755	duf221 domain	1011	20	3.82172e-172	49.45%	2	C:membrane; F:nucleotide binding	0	IPR003864; IPR012677; PTHR13018 (PANTHER), PF13967 (PFAM), SignalP-NN(euk) (SIGNALP), tmhmm (TMHMM)
LCOR_00986.1	-1.42609	0.372137	6.86644	18.4514	TRUE	0.0077133	composite domain of metallo-dependent hydrolase	969	20	0	52.0%	2	F:hydrolase activity, acting on carbon-nitrogen (but not peptide) bonds; F:hydrolase activity		IPR011059; G3DSA:2.30.40.10 (GENE3D), PTHR11647 (PANTHER), PF13147 (PFAM), PS51257 (PROFILE), SignalP-NN(euk) (SIGNALP), tmhmm (TMHMM), SSF51556 (SUPERFAMILY)
LCOR_00987.1	-1.69595	0.30865	16.8902	54.7228	TRUE	0.000335016	hypothetical protein RO3G_12846	283	5	5.5698e-44	63.8%	0	0		IPR004864; tmhmm (TMHMM)
LCOR_00988.1	-0.368357	0.774664	25.5929	33.0375	FALSE	0.651336	ubiquitin-protein ligase	1877	20	0	65.5%	4	F:ubiquitin-protein ligase activity; C:intracellular; P:cellular protein modification process; F:binding	EC:6.3.2.19	IPR000569; IPR011989; IPR016024; G3DSA:3.30.2160.10 (GENE3D), PTHR11254 (PANTHER), PTHR11254:SF74 (PANTHER)
LCOR_00989.1	-0.947214	0.518633	219.005	422.273	FALSE	0.280236	rab gdp-dissociation inhibitor	441	20	0	82.05%	2	F:Rab GDP-dissociation inhibitor activity; P:protein transport	0	IPR000806; IPR018203; G3DSA:3.30.519.10 (GENE3D), G3DSA:3.50.50.60 (GENE3D), PTHR11787 (PANTHER), SSF51905 (SUPERFAMILY), SSF54373 (SUPERFAMILY)
LCOR_00990.1	0.209376	1.15619	120.797	104.479	FALSE	0.0183068	endosomal spry domain	331	20	8.53077e-130	75.95%	1	F:protein binding	0	IPR001870; IPR003877; IPR008985; IPR018355; PTHR12864 (PANTHER), PTHR12864:SF11 (PANTHER), SignalP-NN(euk) (SIGNALP), tmhmm (TMHMM)
LCOR_00991.1	-0.42283	0.74596	23.9076	32.0494	FALSE	0.941533	---NA---	106	0			0	0		no IPS match
LCOR_00992.1	-0.263399	0.833123	134.876	161.893	FALSE	0.508639	---NA---	270	0			2	F:zinc ion binding; F:nucleic acid binding	0	IPR007087; IPR013087; IPR015880; PTHR11389 (PANTHER), PF13465 (PFAM), SSF57667 (SUPERFAMILY)
LCOR_00993.1	-1.20956	0.432401	9.85903	22.8007	FALSE	0.0997113	lipase	330	20	2.25752e-50	57.35%	2	P:metabolic process; F:hydrolase activity	0	IPR013094; G3DSA:3.40.50.1820 (GENE3D), PTHR23024 (PANTHER), SSF53474 (SUPERFAMILY)
LCOR_00994.1	-2.8061	0.142981	0.363892	2.54504	FALSE	0.0184966	hypothetical protein RO3G_15710	350	16	1.58805e-41	50.81%	2	F:nucleic acid binding; F:zinc ion binding	0	IPR001878
LCOR_00995.1	-2.92526	0.131646	7.50298	56.9934	TRUE	6.65996e-07	lipase	323	20	1.58649e-60	57.05%	2	P:metabolic process; F:hydrolase activity	0	IPR013094; G3DSA:3.40.50.1820 (GENE3D), PTHR23024 (PANTHER), SSF53474 (SUPERFAMILY)
LCOR_00997.1	-2.1605	0.223679	9.12385	40.7899	TRUE	5.68578e-06	esterase lipase	321	20	4.05132e-68	60.65%	2	P:metabolic process; F:hydrolase activity	0	IPR013094; G3DSA:3.40.50.1820 (GENE3D), PTHR23024 (PANTHER), SSF53474 (SUPERFAMILY)
LCOR_00998.1	-1.15833	0.44803	0.554072	1.23668	FALSE	0.527215	esterase lipase	344	20	1.05842e-48	59.4%	2	P:metabolic process; F:hydrolase activity	0	IPR002168; IPR013094; G3DSA:3.40.50.1820 (GENE3D), PTHR23024 (PANTHER), SSF53474 (SUPERFAMILY)
LCOR_00999.1	1.9737	3.92774	0.243044	0.0618788	FALSE	0.189393	glycosyl transferase family protein	314	20	5.50793e-82	59.45%	2	F:transferase activity; F:transferase activity, transferring glycosyl groups		IPR002495; G3DSA:3.90.550.10 (GENE3D), PTHR11183 (PANTHER), PTHR11183:SF3 (PANTHER), SSF53448 (SUPERFAMILY)
LCOR_01000.1	-1.24337	0.422384	8.91737	21.112	FALSE	0.0532171	hypothetical protein RO3G_06859	450	1	4.92493e-85	58.0%	0	0		IPR002885; PTHR24015 (PANTHER), SignalP-NN(euk) (SIGNALP)
LCOR_01001.1	-1.22305	0.428377	69.7993	162.939	FALSE	0.0383804	histone h2a	130	20	1.01214e-68	88.9%	5	C:nucleosome; F:DNA binding; C:nucleus; P:nucleosome assembly; F:protein heterodimerization activity	0	IPR002119; IPR007125; IPR009072; PTHR23430 (PANTHER)
LCOR_01002.1	-1.47626	0.359421	7.1897	20.0036	TRUE	0.00611064	sel1 repeat protein	1769	20	0	42.25%	1	F:protein binding	0	IPR006597; IPR011990; IPR019734; PTHR11102 (PANTHER), SSF81901 (SUPERFAMILY)
LCOR_01003.1	-1.03623	0.4876	0.320891	0.658104	FALSE	0.826047	polysaccharide lyase family 14 protein	307	20	7.1904e-69	59.45%	1	F:lyase activity		SignalP-NN(euk) (SIGNALP)
LCOR_01005.1	-0.557597	0.679433	10.8282	15.9372	FALSE	1	hd phosphohydrolase domain-containing protein	489	20	6.13934e-171	66.0%	2	F:phosphoric diester hydrolase activity; F:metal ion binding	EC:3.1.4.0	IPR003607; IPR006674; PTHR11373 (PANTHER), PTHR11373:SF9 (PANTHER), SSF109604 (SUPERFAMILY)
LCOR_01006.1	-0.718976	0.607529	15.3075	25.1964	FALSE	0.779682	---NA---	119	0			0	0		no IPS match
LCOR_01007.1	-Inf	0	0	0.0392719	FALSE	1	---NA---	238	0			0	0		no IPS match
LCOR_01008.1	-Inf	0	0	0.0332779	FALSE	1	hypothetical protein RO3G_08136	258	2	2.69545e-45	70.5%	0	0		IPR022185; tmhmm (TMHMM)
LCOR_01010.1	-0.569917	0.673655	108.118	160.495	FALSE	1	nuclear movement protein nudc	193	20	7.1756e-86	78.3%	0	0		IPR007052; IPR008978; IPR017447; G3DSA:2.60.40.790 (GENE3D), PTHR12356 (PANTHER), PTHR12356:SF3 (PANTHER)
LCOR_01011.1	1.98234	3.95134	119.534	30.2517	TRUE	3.23788e-08	isoform a	115	20	1.05602e-45	74.45%	13	F:molecular_function; P:biological_process; C:cellular_component; P:oxidation-reduction process; F:heme binding; F:electron carrier activity; F:iron ion binding; F:monooxygenase activity; P:regulation of transcription, DNA-dependent; P:transcription, DNA-dependent; C:nucleus; F:sequence-specific DNA binding transcription factor activity; F:DNA binding		IPR004910; PTHR13847 (PANTHER), PTHR13847:SF50 (PANTHER)
LCOR_01012.1	-1.05624	0.480883	41.2386	85.7559	FALSE	0.162598	aaa-domain-containing protein	763	20	0	74.6%	2	F:nucleoside-triphosphatase activity; F:ATP binding	EC:3.6.1.15	IPR003338; IPR003593; IPR003959; IPR003960; IPR004201; IPR009010; IPR027417; G3DSA:1.10.8.60 (GENE3D), G3DSA:3.10.330.10 (GENE3D), G3DSA:3.40.50.300 (GENE3D), PTHR23078 (PANTHER), PTHR23078:SF0 (PANTHER), SSF54585 (SUPERFAMILY)
LCOR_01013.1	-1.26608	0.415788	60.8081	146.248	FALSE	0.035794	kinesin heavy chain	932	20	0	73.8%	4	F:microtubule motor activity; F:ATP binding; C:microtubule associated complex; P:microtubule-based movement	0	IPR001752; IPR019821; IPR027417; PTHR24115 (PANTHER), PTHR24115:SF10 (PANTHER)
LCOR_01014.1	-1.29593	0.407275	11.2666	27.6635	FALSE	0.0446228	cyclin c	264	20	1.82272e-58	64.95%	2	P:regulation of cyclin-dependent protein kinase activity; F:protein kinase binding	0	IPR006671; IPR013763; IPR015429; IPR023598; PTHR10026:SF44 (PANTHER)
LCOR_01015.1	-0.828606	0.563073	13.2072	23.4555	FALSE	0.498178	hypothetical protein RO3G_16310	488	1	1.03569e-38	61.0%	1	C:nucleus	0	IPR005033; IPR016665
LCOR_01016.1	0.0490545	1.03459	0.0653246	0.0631408	FALSE	0.858481	---NA---	445	0			0	0		no IPS match
LCOR_01017.1	-1.30727	0.404084	4.50153	11.1401	FALSE	0.0418751	hypothetical protein RO3G_02800	682	1	7.24678e-43	56.0%	0	0		no IPS match
LCOR_01018.1	-0.922189	0.527708	81.905	155.209	FALSE	0.282821	ras-related protein rab-32	213	20	8.77303e-109	73.95%	8	F:GTP binding; P:small GTPase mediated signal transduction; F:GTPase activity; P:GTP catabolic process; P:intracellular protein transport; P:nucleocytoplasmic transport; C:intracellular; C:membrane	0	IPR001806; IPR002041; IPR003578; IPR003579; IPR005225; IPR020849; IPR027417; G3DSA:3.40.50.300 (GENE3D), PTHR24073 (PANTHER), PTHR24073:SF101 (PANTHER), PS51419 (PROFILE)
LCOR_01019.1	-0.710006	0.611318	7.68698	12.5745	FALSE	0.759914	coiled-coil domain-containing protein 75	265	12	1.34511e-28	46.75%	1	F:nucleic acid binding	0	IPR000467; IPR025239; PTHR21032 (PANTHER), PTHR21032:SF0 (PANTHER)
LCOR_01020.1	-1.07647	0.474189	1.67783	3.53831	FALSE	0.463929	mfs transporter	465	20	1.86262e-109	53.65%	2	C:integral to membrane; P:transmembrane transport	0	IPR011701; IPR016196; IPR020846; G3DSA:1.20.1250.20 (GENE3D), PTHR11360 (PANTHER), PTHR11360:SF9 (PANTHER), tmhmm (TMHMM)
LCOR_01021.1	-0.923091	0.527378	14.6235	27.7287	FALSE	0.312226	mrna-capping enzyme subunit alpha	377	20	9.61129e-101	60.0%	3	F:mRNA guanylyltransferase activity; P:7-methylguanosine mRNA capping; C:mRNA cap methyltransferase complex	EC:2.7.7.50	IPR001339; IPR012340; IPR013846; IPR017075; G3DSA:3.30.470.30 (GENE3D), PTHR24609 (PANTHER), PTHR24609:SF1 (PANTHER), SSF56091 (SUPERFAMILY)
LCOR_01022.1	-1.24483	0.421958	3.56677	8.4529	FALSE	0.0879033	dead deah box rna	530	20	0	69.75%	3	F:nucleic acid binding; F:ATP binding; F:ATP-dependent helicase activity	0	IPR000629; IPR001650; IPR011545; IPR014001; IPR014014; IPR027417; G3DSA:3.40.50.300 (GENE3D), PTHR24031 (PANTHER), PTHR24031:SF1 (PANTHER)
LCOR_01024.1	-1.9615	0.256762	34.8448	135.709	TRUE	2.54514e-05	transcription factor	540	20	9.77181e-78	54.7%	0	0		IPR007604; PTHR11037 (PANTHER)
LCOR_01025.1	-0.697225	0.616758	19.8248	32.1436	FALSE	0.793275	---NA---	820	0			4	F:sequence-specific DNA binding RNA polymerase II transcription factor activity; C:nucleus; F:zinc ion binding; F:DNA binding	0	IPR001138; IPR007219; PTHR31944 (PANTHER), PTHR31944:SF0 (PANTHER)
LCOR_01026.1	-0.557186	0.679626	8.03034	11.8158	FALSE	1	mitochondrial chaperone bcs1	455	20	0	78.0%	3	F:nucleoside-triphosphatase activity; F:ATP binding; P:mitochondrial respiratory chain complex III assembly	EC:3.6.1.15	IPR003593; IPR003959; IPR003960; IPR014851; IPR027243; IPR027417; G3DSA:3.40.50.300 (GENE3D), PTHR23070 (PANTHER)
LCOR_01027.1	-0.465191	0.724375	36.8517	50.8738	FALSE	0.784695	acetylornithine aminotransferase	455	20	0	67.2%	3	P:arginine metabolic process; F:transaminase activity; F:pyridoxal phosphate binding	EC:2.6.1.0	IPR004636; IPR005814; IPR015421; IPR015422; IPR015424; PIRSF000521 (PIR)
LCOR_01029.1	-0.737929	0.5996	0.0341987	0.0570359	FALSE	1	---NA---	328	0			0	0		IPR014001; IPR027417; G3DSA:3.40.50.300 (GENE3D), SignalP-NN(euk) (SIGNALP)
LCOR_01030.1	-0.729175	0.603249	37.5462	62.24	FALSE	0.695615	histidinol-phosphate aminotransferase	379	20	0	69.45%	3	F:pyridoxal phosphate binding; P:histidine biosynthetic process; F:histidinol-phosphate transaminase activity	EC:2.6.1.9	IPR001917; IPR004839; IPR005861; IPR015421; IPR015422; IPR015424; PTHR11751 (PANTHER), PTHR11751:SF3 (PANTHER)
LCOR_01031.1	0.936929	1.91445	5.49187	2.86865	TRUE	0.00574836	mc family mitochondrial carrier protein	368	20	1.30849e-134	73.2%	3	C:integral to membrane; C:membrane; P:transport		IPR018108; IPR023395; PTHR24089 (PANTHER), PTHR24089:SF50 (PANTHER)
LCOR_01032.1	-0.430833	0.741834	46.8224	63.1171	FALSE	0.793075	pre-mrna-processing protein 45	617	20	0	75.35%	1	C:spliceosomal complex	0	IPR004015; IPR017862
LCOR_01033.1	1.95725	3.8832	123.013	31.6782	TRUE	5.48566e-13	diacylglycerol	562	7	0	51.57%	2	F:diacylglycerol kinase activity; P:protein kinase C-activating G-protein coupled receptor signaling pathway	EC:2.7.1.107	IPR000756; IPR001206; PTHR11255 (PANTHER), PTHR11255:SF20 (PANTHER)
LCOR_01034.1	-0.0351326	0.975942	9.6049	9.84167	FALSE	0.132394	ubiquitin-protein ligase e3a	642	20	4.7239e-169	66.65%	3	F:ubiquitin-protein ligase activity; C:intracellular; P:cellular protein modification process	EC:6.3.2.19	IPR000569; IPR011989; G3DSA:3.30.2160.10 (GENE3D), PTHR11254 (PANTHER), PTHR11254:SF68 (PANTHER)
LCOR_01035.1	-1.73944	0.299487	32.8542	109.702	TRUE	0.000613637	fet3 protein	580	20	0	60.85%	3	F:oxidoreductase activity; P:oxidation-reduction process; F:copper ion binding	0	IPR001117; IPR002355; IPR008972; IPR011706; IPR011707; PTHR11709 (PANTHER), PTHR11709:SF7 (PANTHER), SignalP-NN(euk) (SIGNALP), tmhmm (TMHMM)
LCOR_01036.1	-1.98409	0.252773	22.1145	87.4877	TRUE	1.14736e-05	plasma membrane iron permease	382	20	0	72.15%	2	C:membrane; P:transmembrane transport	0	IPR004923; PTHR31632 (PANTHER), PTHR31632:SF0 (PANTHER), SignalP-NN(euk) (SIGNALP), tmhmm (TMHMM)
LCOR_01037.1	0.445991	1.36225	37.5848	27.5902	FALSE	0.0103068	---NA---	148	0			0	0		no IPS match
LCOR_01041.1	-1.20658	0.433294	3.91593	9.03757	FALSE	0.179363	pseudouridine synthase	430	20	1.78708e-107	61.1%	3	P:pseudouridine synthesis; F:RNA binding; F:pseudouridine synthase activity	EC:5.4.99.12	IPR006145; IPR006224; IPR006225; IPR020103; PTHR10436 (PANTHER), PTHR10436:SF40 (PANTHER)
LCOR_01042.1	-1.05456	0.481445	25.8677	53.7293	FALSE	0.13612	meiotic rna-binding protein 1	524	20	3.24678e-104	62.2%	2	F:RNA binding; F:nucleotide binding	0	IPR000504; IPR002343; IPR012677; PTHR24011 (PANTHER), PTHR24011:SF112 (PANTHER), SSF54928 (SUPERFAMILY)
LCOR_01043.1	-0.600273	0.659629	2.34722	3.5584	FALSE	1	---NA---	80	0			0	0		SignalP-NN(euk) (SIGNALP)
LCOR_01044.1	0.0175092	1.01221	16.37	16.1726	FALSE	0.158708	calponin transgelin	184	20	6.18325e-88	62.7%	2	F:actin binding; P:actomyosin structure organization	0	IPR000557; IPR001715; IPR001997; IPR003096; PTHR18959 (PANTHER)
LCOR_01045.1	Inf	Inf	0.0309357	0	FALSE	1	plc-like phosphodiesterase	363	20	3.51418e-83	55.65%	2	P:lipid metabolic process; F:phosphoric diester hydrolase activity	EC:3.1.4.0	IPR017946; PTHR31498 (PANTHER), PS51257 (PROFILE), SignalP-NN(euk) (SIGNALP), tmhmm (TMHMM)
LCOR_01046.1	-0.477955	0.717995	3.75975	5.23646	FALSE	0.962894	1-acyl-sn-glycerol-3-phosphate acyltransferase	352	20	2.21666e-112	58.2%	1	P:metabolic process	0	IPR002123; PTHR23063 (PANTHER), PTHR23063:SF2 (PANTHER), SSF69593 (SUPERFAMILY)
LCOR_01047.1	-0.71746	0.608167	81.1577	133.446	FALSE	0.698654	camp independent regulatory protein	338	20	1.77423e-81	66.25%	0	0		IPR018608
LCOR_01048.1	1.13947	2.203	291.222	132.194	TRUE	1.57987e-05	phosphoenolpyruvate carboxykinase	534	20	0	78.35%	3	F:phosphoenolpyruvate carboxykinase (ATP) activity; F:ATP binding; P:gluconeogenesis	EC:4.1.1.49	IPR001272; IPR008210; IPR013035; G3DSA:2.170.8.10 (GENE3D), PTHR30031 (PANTHER), PTHR30031:SF0 (PANTHER), SSF53795 (SUPERFAMILY)
LCOR_01049.1	0.266813	1.20315	30.4534	25.3115	FALSE	0.0302801	---NA---	117	0			0	0		G3DSA:3.10.20.90 (GENE3D), PTHR14942 (PANTHER), SSF54236 (SUPERFAMILY)
LCOR_01050.1	2.29372	4.90318	1983.1	404.452	TRUE	3.6633e-13	---NA---	445	0			1	F:chaperone binding	0	IPR003103; G3DSA:1.20.58.120 (GENE3D), SSF63491 (SUPERFAMILY)
LCOR_01051.1	-0.153762	0.898904	3.70947	4.12666	FALSE	0.799879	---NA---	84	0			0	0		SignalP-NN(euk) (SIGNALP)
LCOR_01052.1	0.765132	1.69953	21.8037	12.8293	TRUE	0.00556883	---NA---	94	0			0	0		SignalP-NN(euk) (SIGNALP)
LCOR_01053.1	-1.44121	0.368257	28.2097	76.6031	FALSE	0.050134	hypothetical protein RO3G_07638	179	1	6.09948e-32	84.0%	1	F:protein dimerization activity	0	IPR011598; PTHR11514 (PANTHER)
LCOR_01054.1	0.738131	1.66801	133.089	79.7892	TRUE	0.000143875	developmental regulator	417	20	5.66916e-53	70.1%	4	P:autophagy; C:late endosome; P:protein transport; P:transport		IPR021740
LCOR_01055.1	-0.787647	0.579288	58.3301	100.693	FALSE	0.580109	---NA---	110	0			0	0		no IPS match
LCOR_01056.1	-0.108745	0.927394	76.3563	82.3343	FALSE	0.183135	upf0041 domain protein	129	20	1.3565e-52	76.3%	0	0		IPR005336; PTHR14154 (PANTHER), PTHR14154:SF2 (PANTHER), tmhmm (TMHMM)
LCOR_01057.1	0.621023	1.53797	101.217	65.8126	TRUE	0.000420261	glycerol-3-phosphate o-acyltransferase	613	20	0	60.85%	1	P:metabolic process	0	IPR002123; PTHR31605 (PANTHER), PTHR31605:SF0 (PANTHER), tmhmm (TMHMM), SSF69593 (SUPERFAMILY)
LCOR_01058.1	-0.977708	0.507786	0.512363	1.00901	FALSE	0.744111	protein	451	12	1.11475e-44	48.42%	2	C:integral to membrane; P:transmembrane transport	0	IPR011701; IPR016196; IPR020846; G3DSA:1.20.1250.20 (GENE3D), PTHR11360 (PANTHER), tmhmm (TMHMM)
LCOR_01059.1	-1.27019	0.414605	18.0712	43.5865	FALSE	0.0324282	kinesin-like protein	1600	20	0	59.7%	6	F:protein binding; F:microtubule motor activity; F:ATP binding; C:microtubule associated complex; P:microtubule-based movement; F:phospholipid binding	0	IPR000253; IPR001752; IPR001849; IPR008984; IPR011993; IPR019821; IPR022164; IPR027417; PTHR24115 (PANTHER), PTHR24115:SF128 (PANTHER), SSF50729 (SUPERFAMILY)
LCOR_01060.1	-0.0872813	0.941295	5.98477	6.35802	FALSE	0.429028	---NA---	130	0			0	0		no IPS match
LCOR_01061.1	-0.732368	0.601915	8.9024	14.7901	FALSE	0.702019	hypothetical protein RO3G_05596	270	1	1.51198e-94	71.0%	0	0		IPR011047; IPR018391; IPR027295; PF13360 (PFAM)
LCOR_01062.1	0.0331082	1.02321	26.8496	26.2404	FALSE	0.0632179	mitochondrion biogenesis protein	663	20	0	57.35%	2	C:mitochondrial inner membrane; P:mitochondrion organization	0	IPR012571; PTHR31068 (PANTHER), PTHR31068:SF0 (PANTHER), tmhmm (TMHMM)
LCOR_01063.1	-1.41281	0.375578	4.67462	12.4465	FALSE	0.0124748	dna mismatch repair protein	913	20	0	68.85%	5	F:ATP binding; P:mismatch repair; F:mismatched DNA binding; C:MutSalpha complex; C:MutSbeta complex	0	IPR000432; IPR007695; IPR007696; IPR007860; IPR007861; IPR011184; IPR027417; G3DSA:1.10.1420.10 (GENE3D), G3DSA:3.40.50.300 (GENE3D), PTHR11361 (PANTHER), PTHR11361:SF35 (PANTHER)
LCOR_01064.1	-0.773646	0.584937	31.6943	54.1841	FALSE	0.557764	der1like family	261	20	1.87156e-70	67.9%	3	F:molecular_function; P:biological_process; C:cellular_component		IPR007599; PTHR11009:SF0 (PANTHER), SignalP-NN(euk) (SIGNALP), tmhmm (TMHMM), SSF144091 (SUPERFAMILY)
LCOR_01065.1	-0.801276	0.573841	60.9796	106.266	FALSE	0.504444	histidine-phosphotransfer hpt domain-containing protein	180	20	5.98727e-66	73.4%	2	P:two-component signal transduction system (phosphorelay); F:signal transducer activity	0	IPR008207
LCOR_01067.1	0.811905	1.75553	0.375384	0.21383	FALSE	0.159097	phosphate transporter	525	20	0	66.55%	3	C:integral to membrane; F:transmembrane transporter activity; P:transmembrane transport	0	IPR005828; IPR005829; IPR016196; IPR020846; G3DSA:1.20.1250.20 (GENE3D), PTHR24064 (PANTHER), PTHR24064:SF0 (PANTHER), tmhmm (TMHMM)
LCOR_01068.1	-0.977977	0.507691	8.45241	16.6487	FALSE	0.197823	aaa atpase	1294	15	0	44.73%	9	F:nucleotide binding; F:nucleoside-triphosphatase activity; F:ATP binding; P:DNA repair; F:ATP-dependent DNA helicase activity; F:DNA binding; F:helicase activity; F:nucleic acid binding; F:ATP-dependent helicase activity		IPR027417; G3DSA:3.40.50.300 (GENE3D), PTHR10887 (PANTHER), PTHR10887:SF56 (PANTHER), PF13087 (PFAM), PF13604 (PFAM)
LCOR_01069.1	-1.95558	0.257818	0.376723	1.4612	FALSE	0.13373	forkhead box protein j2	493	20	2.04355e-38	86.15%	2	F:sequence-specific DNA binding transcription factor activity; F:sequence-specific DNA binding	0	IPR001766; IPR011991; IPR018122; PTHR11829 (PANTHER), SSF46785 (SUPERFAMILY)
LCOR_01070.1	-0.130255	0.91367	3.08874	3.38059	FALSE	0.255263	-beta-glucan synthase component fks1	1914	20	0	72.9%	2	P:(1->3)-beta-D-glucan biosynthetic process; C:membrane	0	IPR003440; IPR026899; PTHR31738 (PANTHER), PTHR31738:SF0 (PANTHER), tmhmm (TMHMM)
LCOR_01071.1	-1.14925	0.450861	26.3049	58.3438	FALSE	0.0692164	sporulation protein rmd1	479	20	2.57831e-69	56.2%	5	F:molecular_function; C:cytoplasm; P:sporulation resulting in formation of a cellular spore; P:biological_process; P:meiosis		IPR003734; PTHR16255:SF0 (PANTHER), tmhmm (TMHMM)
LCOR_01072.1	-2.55008	0.170745	108.657	636.367	TRUE	1.30731e-09	vacuolar calcium ion transporter h(+) exchanger	382	20	1.70724e-114	70.4%	4	C:integral to membrane; P:transmembrane transport; P:calcium ion transport; F:calcium:hydrogen antiporter activity	0	IPR004713; IPR004798; IPR004837; PTHR31503 (PANTHER), tmhmm (TMHMM)
LCOR_01073.1	-0.507334	0.703521	3.75433	5.33648	FALSE	1	hypothetical protein RO3G_10368	3216	4	0	49.5%	0	0		PTHR14918 (PANTHER), SSF53300 (SUPERFAMILY)
LCOR_01074.1	-0.179127	0.883237	1319.51	1493.95	FALSE	0.296794	40s ribosomal protein s27	84	20	1.26242e-51	91.3%	3	F:structural constituent of ribosome; C:ribosome; P:translation	0	IPR000592; IPR011332; IPR023407; PTHR11594:SF0 (PANTHER)
LCOR_01075.1	-1.54317	0.343131	3.06275	8.92589	TRUE	0.0050138	dna mismatch repair protein msh6	1082	20	0	66.4%	3	F:ATP binding; P:mismatch repair; F:mismatched DNA binding	0	IPR000432; IPR007695; IPR007696; IPR007860; IPR007861; IPR016151; IPR017261; IPR027417; G3DSA:1.10.1420.10 (GENE3D), G3DSA:3.40.50.300 (GENE3D), PTHR11361 (PANTHER), PTHR11361:SF26 (PANTHER)
LCOR_01076.1	-1.17461	0.443004	3.24311	7.32073	FALSE	0.0778469	hira interacting protein hip3	1629	20	0	42.4%	1	F:protein binding	0	IPR011990; PTHR15502 (PANTHER), SSF48452 (SUPERFAMILY)
LCOR_01077.1	-0.894329	0.537998	157.08	291.971	FALSE	0.355707	coatomer protein	176	20	1.63173e-101	74.25%	1	P:transport	0	IPR011012; IPR022775; G3DSA:3.30.450.60 (GENE3D), PTHR11043 (PANTHER), PTHR11043:SF0 (PANTHER), SignalP-NN(euk) (SIGNALP)
LCOR_01078.1	-Inf	0	0	0.0617993	FALSE	1	---NA---	151	0			0	0		no IPS match
LCOR_01079.1	1.52152	2.87093	2994	1042.87	TRUE	9.4344e-08	heat shock protein hss1	650	20	0	92.85%	4	F:ATP binding; P:response to stress; F:nucleotide binding; C:cytoplasm		IPR013126; IPR018181; G3DSA:1.20.1270.10 (GENE3D), G3DSA:2.60.34.10 (GENE3D), G3DSA:3.30.30.30 (GENE3D), G3DSA:3.30.420.40 (GENE3D), G3DSA:3.90.640.10 (GENE3D), PTHR19375 (PANTHER), SSF100920 (SUPERFAMILY), SSF100934 (SUPERFAMILY), SSF53067 (SUPERFAMILY)
LCOR_01080.1	0.287929	1.22089	204.194	167.251	FALSE	0.0110787	endosomal cargo receptor	219	20	1.7928e-51	64.5%	2	P:transport; C:integral to membrane	0	IPR009038; PTHR22811 (PANTHER), PTHR22811:SF4 (PANTHER), SignalP-NN(euk) (SIGNALP), tmhmm (TMHMM)
LCOR_01081.1	2.77385	6.83929	11.9687	1.74999	TRUE	1.52482e-10	opi1-domain-containing protein	259	9	5.94409e-57	60.11%	0	0		IPR013927
LCOR_01082.1	-0.732699	0.601777	9.75428	16.2091	FALSE	0.706771	---NA---	203	0			0	0		IPR013246
LCOR_01083.1	Inf	Inf	0.376058	0	FALSE	0.466756	---NA---	89	0			0	0		SignalP-NN(euk) (SIGNALP), tmhmm (TMHMM)
LCOR_01084.1	0.0712011	1.05059	34.3181	32.6655	FALSE	0.0594165	hypothetical protein RO3G_07164	1180	3	1.31756e-29	72.0%	3	F:RNA polymerase II transcription cofactor activity; P:regulation of transcription from RNA polymerase II promoter; C:mediator complex	0	IPR003101; IPR008626
LCOR_01085.1	-0.486449	0.71378	7.32927	10.2682	FALSE	0.98338	hypothetical protein RO3G_10492	341	1	1.92702e-40	69.0%	0	0		IPR012921; PTHR14914 (PANTHER), PTHR14914:SF0 (PANTHER)
LCOR_01086.1	-1.56839	0.337184	237.331	703.863	TRUE	0.00426421	hypothetical protein RO3G_06355	68	2	1.24921e-28	86.5%	0	0		IPR021278; tmhmm (TMHMM)
LCOR_01087.1	-0.0418957	0.971378	0.483376	0.497619	FALSE	0.698654	---NA---	223	0			0	0		SignalP-NN(euk) (SIGNALP), tmhmm (TMHMM)
LCOR_01088.1	-0.460053	0.72696	1.41338	1.94424	FALSE	0.976705	hypothetical protein RO3G_07081	170	1	6.83924e-33	58.0%	0	0		IPR009009; IPR014733; SignalP-NN(euk) (SIGNALP), tmhmm (TMHMM)
LCOR_01089.1	-1.4476	0.366632	7.30729	19.9308	FALSE	0.0107746	tetratricopeptide repeat protein partial	1155	16	0	57.25%	1	F:protein binding	0	IPR011990; IPR019412; PTHR31859 (PANTHER), SSF48452 (SUPERFAMILY)
LCOR_01090.1	-1.09522	0.468066	3.74135	7.99322	FALSE	0.302836	---NA---	282	0			0	0		IPR008011; PTHR13166 (PANTHER)
LCOR_01091.1	1.24581	2.37151	481.657	203.101	TRUE	7.59572e-08	probable glucokinase	487	20	0	66.75%	2	F:ATP binding; P:carbohydrate metabolic process	0	IPR001312; IPR022672; IPR022673; G3DSA:3.30.420.40 (GENE3D), G3DSA:3.40.367.20 (GENE3D), SSF53067 (SUPERFAMILY)
LCOR_01092.1	-0.169613	0.889081	3.6635	4.12055	FALSE	0.522618	hypothetical protein RO3G_01513	379	2	1.20877e-64	58.5%	0	0		IPR025256; SignalP-NN(euk) (SIGNALP), tmhmm (TMHMM)
LCOR_01093.1	-1.43618	0.369544	31.2285	84.5055	TRUE	0.00629847	---NA---	628	0			3	F:sequence-specific DNA binding RNA polymerase II transcription factor activity; C:nucleus; F:zinc ion binding	0	IPR001138; PTHR31944 (PANTHER), PTHR31944:SF0 (PANTHER)
LCOR_01094.1	-1.44666	0.366869	1.8477	5.0364	FALSE	0.0555974	---NA---	656	0			4	F:sequence-specific DNA binding RNA polymerase II transcription factor activity; C:nucleus; F:zinc ion binding; F:DNA binding	0	IPR001138; IPR007219; PTHR30025 (PANTHER), PTHR30025:SF1 (PANTHER)
LCOR_01095.1	Inf	Inf	0.0958003	0	FALSE	0.461025	taurine catabolism dioxygenase	234	20	4.40665e-67	66.55%	2	F:oxidoreductase activity; P:oxidation-reduction process	0	IPR003819; G3DSA:3.60.130.10 (GENE3D), PTHR30468 (PANTHER), PTHR30468:SF0 (PANTHER), SSF51197 (SUPERFAMILY)
LCOR_01096.1	-0.929566	0.525016	2.13187	4.06059	FALSE	0.32571	dead box helicase	1517	20	0	63.65%	3	F:helicase activity; F:ATP binding; F:DNA binding	0	IPR001650; IPR006935; IPR014001; IPR027417; G3DSA:1.20.1320.20 (GENE3D), G3DSA:3.40.50.300 (GENE3D), PTHR14025 (PANTHER), SignalP-NN(euk) (SIGNALP)
LCOR_01097.1	Inf	Inf	0.329822	0	FALSE	0.321873	---NA---	101	0			0	0		tmhmm (TMHMM)
LCOR_01098.1	3.39318	10.5063	25.9692	2.47179	TRUE	7.57644e-18	---NA---	493	0			0	0		G3DSA:3.80.10.10 (GENE3D), PTHR23125 (PANTHER), SSF52047 (SUPERFAMILY)
LCOR_01099.1	-0.437598	0.738363	10.4537	14.158	FALSE	0.863213	rna binding protein	478	20	1.17763e-41	81.55%	2	F:nucleic acid binding; F:nucleotide binding	0	IPR000504; IPR012677; PTHR11546 (PANTHER), PTHR11546:SF4 (PANTHER), SSF54928 (SUPERFAMILY)
LCOR_01101.1	-0.33545	0.792537	9.51781	12.0093	FALSE	0.607762	hypothetical protein RO3G_14404	329	1	1.17964e-71	60.0%	0	0		PF13622 (PFAM), SSF54637 (SUPERFAMILY)
LCOR_01102.1	-1.33577	0.396181	14.2125	35.8737	FALSE	0.0152123	replication factor-a protein 1	591	20	1.18525e-160	62.1%	3	F:DNA binding; C:nucleus; P:DNA replication	0	IPR004365; IPR004591; IPR007199; IPR012340; IPR013955; PTHR23273 (PANTHER)
LCOR_01103.1	-0.74709	0.595804	249.633	418.985	FALSE	0.729512	guanine nucleotide binding protein beta subunit	316	20	0	87.8%	1	F:protein binding	0	IPR001680; IPR015943; IPR017986; IPR019775; IPR020472; PTHR19868 (PANTHER), PTHR19868:SF0 (PANTHER)
LCOR_01105.1	-1.04942	0.483162	38.5874	79.8643	FALSE	0.137225	ard1 family protein	232	20	2.2941e-90	84.6%	1	F:N-acetyltransferase activity	0	IPR000182; IPR016181; PTHR23091 (PANTHER), PTHR23091:SF4 (PANTHER)
LCOR_01106.1	-1.66869	0.31454	0.589894	1.87542	FALSE	0.42983	---NA---	129	0			0	0		SignalP-NN(euk) (SIGNALP)
LCOR_01107.1	-1.53404	0.345308	0.180209	0.521879	FALSE	0.329682	mfs transporter	574	20	4.31121e-82	52.65%	2	C:integral to membrane; P:transmembrane transport	0	IPR011701; IPR016196; IPR020846; G3DSA:1.20.1250.20 (GENE3D), PTHR24003 (PANTHER), PTHR24003:SF124 (PANTHER), tmhmm (TMHMM)
LCOR_01108.1	-1.7123	0.305173	185.816	608.887	TRUE	0.000539896	myosin regulatory light chain cdc4	155	20	4.64268e-65	77.9%	1	F:calcium ion binding	0	IPR002048; IPR011992; PTHR23048 (PANTHER), PTHR23048:SF0 (PANTHER), SSF47473 (SUPERFAMILY)
LCOR_01109.1	-1.79205	0.288762	2.1735	7.52695	FALSE	0.0959046	dihydrodipicolinate synthetase family protein	312	20	8.94552e-92	60.8%	2	P:metabolic process; F:lyase activity	0	IPR002220; IPR013785; PTHR12128:SF10 (PANTHER), SSF51569 (SUPERFAMILY)
LCOR_01110.1	1.33763	2.52736	252.534	99.9201	TRUE	1.99382e-07	---NA---	183	0			0	0		tmhmm (TMHMM)
LCOR_01111.1	-1.62423	0.324382	0.941718	2.90311	FALSE	0.220309	vacuolar iron transporter 1-like	305	20	5.41346e-106	68.4%	6	P:intracellular sequestering of iron ion; F:iron ion transmembrane transporter activity; C:vacuolar membrane; P:iron ion homeostasis; P:iron ion transmembrane transport; C:membrane		IPR008217; PTHR31851 (PANTHER), tmhmm (TMHMM)
LCOR_01112.1	-1.20053	0.435115	9.40124	21.6064	FALSE	0.133719	hypothetical protein RO3G_10209	506	2	2.33383e-78	60.0%	0	0		SignalP-NN(euk) (SIGNALP), tmhmm (TMHMM)
LCOR_01113.1	-1.25534	0.418895	1.67588	4.00071	FALSE	0.174154	snrna-activating protein complex subunit 3-like	547	20	3.50767e-37	48.8%	3	P:metabolic process; F:N-acetyltransferase activity; C:cellular_component		IPR022042
LCOR_01115.1	0.0412662	1.02902	1.16917	1.1362	FALSE	0.641413	---NA---	124	0			0	0		no IPS match
LCOR_01116.1	-0.146122	0.903676	3.31815	3.67183	FALSE	0.698654	---NA---	98	0			0	0		no IPS match
LCOR_01118.1	-0.517591	0.698537	0.17977	0.257352	FALSE	1	---NA---	112	0			0	0		no IPS match
LCOR_01120.1	Inf	Inf	0.0911194	0	FALSE	1	---NA---	123	0			0	0		SignalP-NN(euk) (SIGNALP)
LCOR_01121.1	-1.33705	0.395828	7.48498	18.9097	FALSE	0.0304106	related to gyp5-gtpase-activating protein	796	20	0	67.55%	3	F:Rab GTPase activator activity; C:intracellular; P:regulation of Rab GTPase activity	0	IPR000195; G3DSA:1.10.8.270 (GENE3D), PTHR22957 (PANTHER), PTHR22957:SF44 (PANTHER)
LCOR_01122.1	-0.463138	0.725407	89.564	123.467	FALSE	0.866824	arm repeat-containing protein	426	20	1.13765e-180	62.85%	2	F:protein binding; P:RNA metabolic process	0	IPR003307; IPR016021; IPR016024; PTHR14208 (PANTHER), PTHR14208:SF2 (PANTHER)
LCOR_01123.1	-0.942912	0.520182	25.4289	48.8847	FALSE	0.252768	swi snf-related matrix-associated actin-dependent regulator of chromatin subfamily d member 1-like	437	20	6.97153e-134	63.9%	1	F:protein binding	0	IPR003121; IPR019835; G3DSA:1.10.245.10 (GENE3D), PTHR13844 (PANTHER), PTHR13844:SF0 (PANTHER)
LCOR_01124.1	-1.92692	0.262991	4.14669	15.7674	TRUE	0.00121904	aldose 1-epimerase	365	20	1.6113e-156	60.5%	3	F:isomerase activity; F:carbohydrate binding; P:hexose metabolic process	0	IPR008183; IPR011013; IPR014718; IPR015443; IPR018052; PTHR10091:SF0 (PANTHER)
LCOR_01125.1	-1.78696	0.289783	2.27927	7.86546	TRUE	0.00727418	mitochondrial carrier protein	382	20	6.65286e-66	51.7%	6	C:integral to membrane; C:membrane; P:transport; F:binding; P:transmembrane transport; C:mitochondrial inner membrane		IPR018108; IPR023395; PTHR24089 (PANTHER), PTHR24089:SF71 (PANTHER), SignalP-NN(euk) (SIGNALP), tmhmm (TMHMM)
LCOR_01126.1	0.767616	1.70245	0.116389	0.0683653	FALSE	0.486766	mfs general substrate transporter	559	20	6.666e-86	47.4%	4	F:transporter activity; C:plasma membrane; C:integral to membrane; P:transmembrane transport	0	IPR001958; IPR011701; IPR016196; IPR020846; G3DSA:1.20.1250.20 (GENE3D), PTHR24003 (PANTHER), tmhmm (TMHMM)
LCOR_01127.1	-0.317558	0.802427	5.82531	7.25961	FALSE	0.730703	---NA---	272	0			1	P:calcium-mediated signaling	0	IPR006931; PTHR10300:SF10 (PANTHER)
LCOR_01128.1	0.496696	1.41098	1.59504	1.13045	FALSE	0.229915	---NA---	206	0			0	0		no IPS match
LCOR_01129.1	-1.14081	0.453504	6.53874	14.4183	FALSE	0.0966678	cell division cycle protein 27 homolog isoform 2	712	20	3.00851e-154	51.65%	1	F:protein binding	0	IPR011990; IPR013026; IPR019734; PTHR12558 (PANTHER), PTHR12558:SF11 (PANTHER), PF12895 (PFAM), SSF48452 (SUPERFAMILY)
LCOR_01130.1	-0.196645	0.872577	274.045	314.064	FALSE	0.321873	dihydrolipoamide acetyltransferase	508	20	0	69.55%	3	F:dihydrolipoyllysine-residue acetyltransferase activity; C:mitochondrial pyruvate dehydrogenase complex; P:acetyl-CoA biosynthetic process from pyruvate	EC:2.3.1.12	IPR000089; IPR001078; IPR003016; IPR004167; IPR006257; IPR011053; IPR023213; IPR027189; G3DSA:2.40.50.100 (GENE3D), PTHR23151 (PANTHER), SSF52777 (SUPERFAMILY)
LCOR_01131.1	-0.493068	0.710513	53.8028	75.724	FALSE	0.864958	methylthioribose-1-phosphate isomerase	398	20	0	73.45%	1	P:cellular biosynthetic process	0	IPR000649; IPR005251; IPR011559; IPR027363; G3DSA:3.40.50.10470 (GENE3D), SSF100950 (SUPERFAMILY)
LCOR_01132.1	-0.431764	0.741355	303.645	409.581	FALSE	0.779977	---NA---	68	0			3	F:structural constituent of ribosome; C:ribosome; P:translation	0	IPR000289; IPR012340
LCOR_01133.1	0.290485	1.22305	4.2269	3.45603	FALSE	0.107151	---NA---	277	0			1	F:protein binding	0	IPR011043; IPR015915; PTHR23244 (PANTHER), PF13418 (PFAM)
LCOR_01135.1	0.790829	1.73007	5.97344	3.45272	TRUE	0.000833169	---NA---	523	0			1	F:protein binding	0	IPR015915; PTHR23244 (PANTHER), PF13415 (PFAM), SignalP-NN(euk) (SIGNALP), tmhmm (TMHMM), SSF117281 (SUPERFAMILY)
LCOR_01136.1	2.47421	5.55661	34.1598	6.1476	TRUE	2.34951e-13	adp-ribose pyrophosphatase	156	20	6.77866e-41	61.5%	1	F:hydrolase activity	0	IPR000086; IPR015797; IPR020084; IPR020476; PTHR22769 (PANTHER), PTHR22769:SF0 (PANTHER)
LCOR_01137.1	-1.24707	0.421302	2.08319	4.94463	FALSE	0.0652328	fanconi anemia group i protein	1257	20	7.45061e-134	48.6%	2	F:binding; P:DNA repair	0	IPR016024; IPR026171; PTHR21818:SF0 (PANTHER)
LCOR_01138.1	-1.28192	0.411249	10.8142	26.296	FALSE	0.0233295	rna-binding domain-containing protein	627	20	4.16844e-53	73.85%	2	F:nucleic acid binding; F:nucleotide binding	0	IPR000504; IPR012677; PTHR23003 (PANTHER), SSF54928 (SUPERFAMILY)
LCOR_01140.1	-2.62262	0.162373	1.44029	8.87029	TRUE	8.9755e-07	nicotinamide mononucleotide permease	481	20	2.84637e-90	49.95%	2	C:integral to membrane; P:transmembrane transport	0	IPR011701; IPR016196; IPR020846; G3DSA:1.20.1250.20 (GENE3D), PTHR11662 (PANTHER), PTHR11662:SF3 (PANTHER), tmhmm (TMHMM)
LCOR_01141.1	0.7485	1.68005	57.3167	34.1161	TRUE	4.68684e-05	---NA---	176	0			0	0		SignalP-NN(euk) (SIGNALP)
LCOR_01142.1	0.554402	1.46856	18.544	12.6273	TRUE	0.00350357	---NA---	202	0			0	0		no IPS match
LCOR_01143.1	-1.39854	0.379313	7.31361	19.2812	FALSE	0.153642	hypothetical protein RO3G_14234	104	1	6.93837e-49	89.0%	1	F:protein binding	0	IPR011990; IPR013026; IPR013105; IPR019734; PTHR23083 (PANTHER), PF13414 (PFAM), SSF48452 (SUPERFAMILY)
LCOR_01144.1	-0.889223	0.539905	19.5015	36.1203	FALSE	0.35138	exocyst complex component sec15	795	20	0	61.5%	2	C:exocyst; P:vesicle docking involved in exocytosis	0	IPR007225; IPR014812
LCOR_01145.1	-1.25041	0.420328	17.9358	42.6711	FALSE	0.0983086	ubiquitin-related modifier 1 homolog	103	20	2.83525e-54	77.55%	2	C:cytoplasm; P:tRNA thio-modification	0	IPR012675; IPR015221; IPR016155; PTHR14986:SF2 (PANTHER)
LCOR_01146.1	-0.27904	0.824139	100.414	121.841	FALSE	0.505685	utp-glucose-1-phosphate uridylyltransferase	509	20	0	82.6%	2	P:metabolic process; F:nucleotidyltransferase activity	EC:2.7.7.0	IPR002618; IPR016267; G3DSA:3.90.550.10 (GENE3D), SSF53448 (SUPERFAMILY)
LCOR_01147.1	Inf	Inf	0.136774	0	FALSE	0.698654	---NA---	147	0			0	0		SignalP-NN(euk) (SIGNALP), tmhmm (TMHMM)
LCOR_01148.1	-0.964266	0.512539	58.0994	113.356	FALSE	0.260858	golgi to endosome transporter	513	20	9.44068e-74	89.7%	0	0		IPR001026; IPR008942; IPR013809; PTHR12276 (PANTHER), PTHR12276:SF12 (PANTHER)
LCOR_01149.1	-1.23581	0.424603	17.5757	41.3932	FALSE	0.053811	inositol polyphosphate	911	20	3.87767e-118	51.4%	2	P:phosphatidylinositol dephosphorylation; F:protein binding	0	IPR000300; IPR001680; IPR005135; IPR015943; IPR017986; PTHR11200 (PANTHER), PTHR11200:SF27 (PANTHER)
LCOR_01150.1	-0.917387	0.529467	17.2959	32.6667	FALSE	0.321242	-domain-containing protein	993	20	3.12039e-112	74.0%	5	C:intracellular; P:signal transduction; F:protein binding; P:cell communication; F:phosphatidylinositol binding	0	IPR000198; IPR001683; IPR001849; IPR008936; IPR011993; PTHR23176 (PANTHER), SSF50729 (SUPERFAMILY)
LCOR_01152.1	0.303516	1.23415	14.6995	11.9107	FALSE	0.0249034	1-acylglycerol-3-phosphate acyltransferase	301	20	8.7767e-103	64.0%	3	F:1-acylglycerol-3-phosphate O-acyltransferase activity; P:phospholipid biosynthetic process; C:membrane	EC:2.3.1.51	IPR002123; IPR004552; G3DSA:3.40.1130.10 (GENE3D), PTHR10434 (PANTHER), PTHR10434:SF0 (PANTHER), SignalP-NN(euk) (SIGNALP), tmhmm (TMHMM), SSF69593 (SUPERFAMILY)
LCOR_01153.1	-0.713521	0.60983	0.831769	1.36394	FALSE	0.864855	sodium calcium exchanger protein	857	20	4.15036e-102	60.25%	2	C:integral to membrane; P:transmembrane transport	0	IPR004837; PTHR12266 (PANTHER), PTHR12266:SF0 (PANTHER), SignalP-NN(euk) (SIGNALP), tmhmm (TMHMM)
LCOR_01154.1	-0.511511	0.701487	458.991	654.312	FALSE	0.931382	60s ribosomal protein l6	288	20	2.8834e-117	73.6%	3	F:structural constituent of ribosome; C:ribosome; P:translation	0	IPR000915; IPR005568; IPR014722
LCOR_01156.1	-1.30619	0.404386	68.0216	168.209	FALSE	0.0222724	mitochondrial nad-dependent isocitrate dehydrogenase subunit 1 precursor	428	20	0	83.05%	4	F:magnesium ion binding; F:NAD binding; F:isocitrate dehydrogenase (NAD+) activity; P:tricarboxylic acid cycle	EC:1.1.1.41	IPR001804; IPR004434; IPR019818; IPR024084; PTHR11835:SF29 (PANTHER), SSF53659 (SUPERFAMILY)
LCOR_01157.1	-0.24401	0.844395	42.8538	50.7509	FALSE	0.375327	protein	396	20	3.24856e-159	65.35%	1	F:protein binding	0	IPR006594; IPR006595; IPR013144; IPR013720; IPR024964; IPR027370; PTHR12170 (PANTHER), PTHR12170:SF2 (PANTHER), SSF57850 (SUPERFAMILY)
LCOR_01158.1	1.15481	2.22655	151.115	67.8694	TRUE	8.7524e-07	siderophore biosynthesis regulatory protein	536	20	6.86959e-48	65.05%	3	F:sequence-specific DNA binding transcription factor activity; F:zinc ion binding; F:sequence-specific DNA binding	0	IPR000679; IPR013088; IPR013860; PTHR10071 (PANTHER), SSF57716 (SUPERFAMILY)
LCOR_01159.1	0.488302	1.40279	3.64285	2.59685	FALSE	0.0407196	hypothetical protein RO3G_14404	314	1	1.30979e-104	67.0%	0	0		PF13622 (PFAM), SSF54637 (SUPERFAMILY)
LCOR_01160.1	-0.865467	0.548869	0.1568	0.285678	FALSE	1	actin-like atpase domain-containing protein	471	20	0	60.5%	2	F:ATP binding; F:nucleotide binding		IPR013126; G3DSA:3.30.420.40 (GENE3D), PTHR19375 (PANTHER), PTHR19375:SF92 (PANTHER), SSF53067 (SUPERFAMILY)
LCOR_01161.1	-0.840966	0.55827	1.53362	2.7471	FALSE	0.675786	ribosomal small subunit rsm22	444	20	0	53.45%	3	F:copper ion binding; P:translation; F:methyltransferase activity	EC:2.1.1.0	IPR007533; IPR015324; G3DSA:3.40.50.150 (GENE3D), PTHR21320:SF1 (PANTHER), SSF53335 (SUPERFAMILY)
LCOR_01162.1	-0.352236	0.783369	31.0166	39.5939	FALSE	0.580453	ubc-like protein	240	20	7.69417e-80	65.35%	1	F:acid-amino acid ligase activity	EC:6.3.2.0	IPR000608; IPR016135; PTHR24067 (PANTHER), PTHR24067:SF41 (PANTHER), SM00212 (SMART)
LCOR_01163.1	0.829917	1.77758	0.0225238	0.012671	FALSE	1	---NA---	795	0			0	0		no IPS match
LCOR_01164.1	-0.919569	0.528667	17.6922	33.4657	FALSE	0.283926	phospho protein phosphatase ppz	449	20	0	85.25%	1	F:hydrolase activity	0	IPR004843; IPR006186; G3DSA:3.60.21.10 (GENE3D), PTHR11668 (PANTHER), PTHR11668:SF19 (PANTHER), SSF56300 (SUPERFAMILY)
LCOR_01165.1	0.792446	1.73201	0.0731565	0.0422379	FALSE	0.616602	hypothetical protein RO3G_13248	921	1	2.43688e-28	55.0%	0	0		IPR000938; PTHR18916 (PANTHER)
LCOR_01166.1	-0.791349	0.577804	22.6036	39.1198	FALSE	0.537843	---NA---	256	0			0	0		no IPS match
LCOR_01167.1	-0.0654865	0.955623	0.104964	0.109839	FALSE	1	---NA---	85	0			0	0		no IPS match
LCOR_01168.1	-0.665177	0.630611	8.48408	13.4537	FALSE	0.793582	pkinase-domain-containing protein	637	20	7.45037e-165	82.35%	5	F:protein binding; F:ATP binding; P:protein phosphorylation; F:protein serine/threonine kinase activity; F:protein tyrosine kinase activity	EC:2.7.11.0; EC:2.7.10.0	IPR000095; IPR000719; IPR002290; IPR008271; IPR011009; IPR017441; IPR020635; G3DSA:1.10.510.10 (GENE3D), G3DSA:3.30.200.20 (GENE3D), PTHR24361 (PANTHER), PTHR24361:SF26 (PANTHER)
LCOR_01169.1	-1.76102	0.29504	4.75893	16.1298	FALSE	0.0156447	---NA---	279	0			3	F:sequence-specific DNA binding transcription factor activity; F:zinc ion binding; F:sequence-specific DNA binding	0	IPR000679; IPR013088; PTHR10071 (PANTHER), PTHR10071:SF112 (PANTHER), SSF57716 (SUPERFAMILY)
LCOR_01170.1	-0.528991	0.693039	19.0482	27.485	FALSE	0.948206	hypothetical protein RO3G_11115	487	1	1.01906e-26	61.0%	0	0		IPR013243; PTHR15117 (PANTHER)
LCOR_01173.1	-1.13343	0.45583	6.28009	13.7773	FALSE	0.117706	spindle pole body protein ndc80	642	4	2.85827e-37	50.75%	22	P:cell division; P:mitosis; F:oxygen binding; P:response to pheromone; C:nucleus; P:attachment of spindle microtubules to kinetochore involved in homologous chromosome segregation; P:oxygen transport; C:chromosome; C:condensed nuclear chromosome kinetochore; C:Ndc80 complex; F:heme binding; C:condensed chromosome kinetochore; C:kinetochore; P:meiosis; C:chromosome, centromeric region; P:cell cycl…		IPR005550; PTHR10643:SF0 (PANTHER)
LCOR_01174.1	0.0849249	1.06063	63.3279	59.7077	FALSE	0.0523455	hypothetical protein RO3G_02654	546	15	2.6383e-98	51.47%	0	0		IPR014867
LCOR_01175.1	0.5863	1.50139	145.647	97.0079	TRUE	0.000887766	urease	833	20	0	78.6%	3	F:nickel cation binding; P:urea catabolic process; F:urease activity	EC:3.5.1.5	IPR002019; IPR002026; IPR005848; IPR006680; IPR008221; IPR011059; IPR011612; IPR017950; IPR017951; G3DSA:2.30.40.10 (GENE3D), G3DSA:3.20.20.140 (GENE3D), PTHR32426 (PANTHER), PTHR32426:SF0 (PANTHER), SSF51556 (SUPERFAMILY)
LCOR_01176.1	1.25401	2.38503	0.291582	0.122255	FALSE	0.806202	---NA---	76	0			0	0		no IPS match
LCOR_01177.1	0.268603	1.20464	1810.55	1502.98	FALSE	0.0233176	hypothetical protein RO3G_07524	292	1	1.44041e-93	73.0%	0	0		SignalP-NN(euk) (SIGNALP), tmhmm (TMHMM)
LCOR_01178.1	0.743218	1.67391	280.002	167.275	TRUE	0.000171081	long-chain-fatty-acid- -ligase	676	20	0	69.3%	2	F:catalytic activity; P:metabolic process	0	IPR000873; IPR020845; G3DSA:2.30.38.10 (GENE3D), G3DSA:3.40.50.980 (GENE3D), PTHR24096 (PANTHER), SSF56801 (SUPERFAMILY)
LCOR_01179.1	0.958193	1.94288	6.05441	3.11621	TRUE	0.00396215	protein	456	20	0	60.5%	6	P:proteolysis; F:serine-type endopeptidase activity; C:integral to membrane; P:negative regulation of catalytic activity; C:membrane; F:identical protein binding		IPR013057; PTHR22950 (PANTHER), PTHR22950:SF9 (PANTHER), tmhmm (TMHMM)
LCOR_01180.1	0.394234	1.31425	21.4416	16.3148	FALSE	0.0156378	hypothetical protein RO3G_05247	300	2	8.22686e-77	76.5%	0	0		SignalP-NN(euk) (SIGNALP), tmhmm (TMHMM)
LCOR_01181.1	-0.386403	0.765035	2.28384	2.98528	FALSE	0.878531	---NA---	105	0			0	0		tmhmm (TMHMM)
LCOR_01183.1	-0.211149	0.863849	1891.74	2189.89	FALSE	0.344697	s25 ribosomal protein	103	11	4.05017e-40	90.64%	0	0		IPR004977
LCOR_01184.1	-0.591187	0.663797	63.224	95.2461	FALSE	1	maternal g10 transcript	147	20	6.36714e-83	85.9%	1	C:nucleus	0	IPR001748; IPR018230
LCOR_01185.1	0.998913	1.99849	494.265	247.318	TRUE	2.04543e-06	---NA---	244	0			0	0		no IPS match
LCOR_01186.1	0.361842	1.28507	0.210194	0.163567	FALSE	0.682553	monocarboxylate transporter	353	17	9.49105e-59	48.71%	2	C:integral to membrane; P:transmembrane transport	0	IPR011701; IPR016196; IPR020846; G3DSA:1.20.1250.20 (GENE3D), PTHR11360 (PANTHER), SignalP-NN(euk) (SIGNALP), tmhmm (TMHMM)
LCOR_01189.1	1.80421	3.49239	0.485405	0.13899	FALSE	0.0520399	---NA---	336	0			0	0		tmhmm (TMHMM)
LCOR_01190.1	0.320765	1.24899	28.771	23.0353	FALSE	0.0146041	pkinase-domain-containing protein	717	20	0	85.5%	6	F:protein binding; F:ATP binding; P:protein phosphorylation; F:phospholipid binding; F:protein serine/threonine kinase activity; F:protein tyrosine kinase activity	EC:2.7.11.0; EC:2.7.10.0	IPR000095; IPR000719; IPR001849; IPR002290; IPR008271; IPR011009; IPR011993; IPR017441; IPR020635; G3DSA:1.10.510.10 (GENE3D), G3DSA:3.30.200.20 (GENE3D), PTHR24361 (PANTHER), PTHR24361:SF26 (PANTHER), SSF50729 (SUPERFAMILY)
LCOR_01191.1	0.0263421	1.01843	17.3525	17.0385	FALSE	0.0686141	ste12-like transcription factor	586	20	3.24354e-81	75.35%	4	F:sequence-specific DNA binding transcription factor activity; C:nucleus; F:zinc ion binding; F:nucleic acid binding	0	IPR003120; IPR007087; IPR013087; IPR015880; PTHR24402 (PANTHER), PTHR24402:SF3 (PANTHER), PF13465 (PFAM), SSF57667 (SUPERFAMILY)
LCOR_01192.1	-1.90693	0.266659	40.8449	153.173	TRUE	0.000142759	sterol 24-c-methyltransferase	378	20	0	70.35%	2	P:steroid biosynthetic process; F:sterol 24-C-methyltransferase activity	EC:2.1.1.41	IPR013216; IPR013705; IPR025810; G3DSA:3.40.50.150 (GENE3D), PTHR10108 (PANTHER), PTHR10108:SF21 (PANTHER), SSF53335 (SUPERFAMILY)
LCOR_01193.1	-1.03723	0.487261	3.99319	8.19519	FALSE	0.238148	trna uridine 5-carboxymethylaminomethyl modification enzyme gida	686	20	0	71.25%	2	F:flavin adenine dinucleotide binding; P:tRNA wobble uridine modification	0	IPR002218; IPR004416; IPR020595; IPR026904; G3DSA:3.50.50.60 (GENE3D), PTHR11806 (PANTHER), SSF51905 (SUPERFAMILY)
LCOR_01194.1	-0.903734	0.534501	10.4585	19.5668	FALSE	0.429807	---NA---	188	0			0	0		tmhmm (TMHMM)
LCOR_01195.1	-0.814333	0.568672	9.93238	17.4659	FALSE	0.577747	---NA---	379	0			1	F:protein binding	0	IPR001611; IPR003591; G3DSA:3.80.10.10 (GENE3D), PTHR23155 (PANTHER), PF13855 (PFAM), SSF52058 (SUPERFAMILY)
LCOR_01196.1	-2.83666	0.139984	2.29713	16.4099	TRUE	8.97157e-12	lag1-dnabind-domain-containing protein	1114	20	7.80137e-156	51.05%	4	F:protein binding; F:RNA polymerase II core promoter proximal region sequence-specific DNA binding; F:RNA polymerase II core promoter proximal region sequence-specific DNA binding transcription factor activity; C:nucleus	0	IPR002909; IPR008967; IPR013783; IPR014756; IPR015350; IPR015351; G3DSA:2.80.10.50 (GENE3D), PTHR10665 (PANTHER)
LCOR_01198.1	-0.732531	0.601847	0.832144	1.38265	FALSE	0.938469	---NA---	192	0			3	F:antioxidant activity; F:oxidoreductase activity; P:oxidation-reduction process	0	IPR000866; IPR012336; PTHR10681 (PANTHER), PTHR10681:SF22 (PANTHER)
LCOR_01199.1	-1.64166	0.320488	7.47306	23.3177	TRUE	0.000924159	methylcrotonoyl- carboxylase subunit mitochondrial	806	20	0	68.25%	4	F:ATP binding; P:metabolic process; F:metal ion binding; F:biotin carboxylase activity	EC:6.3.4.14	IPR000089; IPR001882; IPR005479; IPR005481; IPR005482; IPR011053; IPR011054; IPR011761; IPR011764; IPR013815; IPR013816; IPR016185; G3DSA:2.40.50.100 (GENE3D), PTHR18866 (PANTHER), SSF56059 (SUPERFAMILY)
LCOR_01200.1	-0.503612	0.705339	619.702	878.588	FALSE	0.947416	ribosomal protein l7a	266	20	2.75427e-117	76.6%	2	C:ribonucleoprotein complex; P:ribosome biogenesis	0	IPR001921; IPR004037; IPR004038; IPR018492; G3DSA:3.30.1330.30 (GENE3D), PTHR23105 (PANTHER), SSF55315 (SUPERFAMILY)
LCOR_01201.1	-1.32546	0.399022	3.34089	8.3727	FALSE	0.0884125	tfiih basal transcription factor complex subunit ssl1	421	20	0	68.2%	4	F:protein binding; F:zinc ion binding; C:core TFIIH complex; P:nucleotide-excision repair	0	IPR002035; IPR004595; IPR007087; IPR007198; IPR012170; G3DSA:3.10.370.10 (GENE3D), PTHR12695:SF2 (PANTHER), SSF53300 (SUPERFAMILY), SSF57889 (SUPERFAMILY)
LCOR_01202.1	-0.700374	0.615413	3.03531	4.93216	FALSE	0.761166	dna mismatch repair protein msh3	992	20	0	68.15%	3	F:ATP binding; P:mismatch repair; F:mismatched DNA binding	0	IPR000432; IPR007695; IPR007696; IPR007860; IPR007861; IPR016151; IPR027417; G3DSA:1.10.1420.10 (GENE3D), G3DSA:3.40.50.300 (GENE3D), PTHR11361 (PANTHER), PTHR11361:SF63 (PANTHER)
LCOR_01203.1	0.305075	1.23548	5.77609	4.67517	FALSE	0.160242	potential mitochondrial inner membrane transporter ymc1	306	20	3.64655e-140	57.7%	8	C:integral to membrane; C:membrane; P:transport; F:binding; P:transmembrane transport; C:mitochondrial inner membrane; C:mitochondrion; F:acyl carnitine transporter activity		IPR018108; IPR023395; PTHR24089 (PANTHER), PTHR24089:SF71 (PANTHER), tmhmm (TMHMM)
LCOR_01204.1	-0.786982	0.579555	14.3424	24.7472	FALSE	0.608498	hypothetical protein RO3G_09315	301	1	3.94433e-48	52.0%	0	0		IPR009563
LCOR_01205.1	-1.14671	0.451653	21.3078	47.1774	FALSE	0.0889123	mrna binding protein pumilio	1026	20	0	79.9%	1	F:RNA binding	0	IPR001313; IPR011989; IPR016024; PTHR12537 (PANTHER), PTHR12537:SF12 (PANTHER)
LCOR_01206.1	-1.2665	0.415666	13.0765	31.4591	FALSE	0.0650957	adenine phosphoribosyltransferase	185	20	1.42735e-50	65.95%	1	P:nucleoside metabolic process	0	IPR000836; G3DSA:3.40.50.2020 (GENE3D), PTHR11776 (PANTHER), SSF53271 (SUPERFAMILY)
LCOR_01207.1	-0.194915	0.873624	15.5672	17.8191	FALSE	0.265033	hypothetical protein RO3G_06604	563	3	2.43848e-39	62.33%	0	0		no IPS match
LCOR_01208.1	0.100211	1.07193	40.6454	37.918	FALSE	0.0947564	---NA---	92	0			0	0		no IPS match
LCOR_01209.1	2.78169	6.87657	104.691	15.2243	TRUE	9.3582e-09	erythrocyte band 7 integral membrane protein	305	20	2.12573e-98	73.65%	1	C:membrane	0	IPR001107; IPR001972; PTHR10264:SF19 (PANTHER), SSF117892 (SUPERFAMILY)
LCOR_01210.1	-0.167652	0.890291	5.65996	6.35743	FALSE	0.277193	dna-directed rna polymerase i complex large subunit nuc1	1641	20	0	66.4%	4	F:DNA binding; F:DNA-directed RNA polymerase activity; C:nucleus; F:zinc ion binding	EC:2.7.7.6	IPR000722; IPR006592; IPR007066; IPR007080; IPR007081; IPR007083; IPR009010; IPR015699; G3DSA:3.30.1490.180 (GENE3D), PTHR19376 (PANTHER), SSF64484 (SUPERFAMILY)
LCOR_01211.1	-0.196253	0.872814	2.50011	2.86442	FALSE	0.573449	---NA---	265	0			0	0		G3DSA:3.80.10.10 (GENE3D)
LCOR_01212.1	-0.163499	0.892857	21.3963	23.9639	FALSE	0.303522	---NA---	310	0			2	P:regulation of cyclin-dependent protein kinase activity; F:protein kinase binding	0	IPR013763; IPR013922; PTHR15615 (PANTHER), PTHR15615:SF0 (PANTHER)
LCOR_01213.1	-0.484925	0.714534	9.09823	12.7331	FALSE	0.902846	poly polymerase pla1	489	20	2.90544e-124	49.45%	4	F:RNA binding; F:polynucleotide adenylyltransferase activity; C:nucleus; P:RNA polyadenylation	EC:2.7.7.19	IPR007010; IPR007012; IPR011068; G3DSA:1.10.1410.10 (GENE3D), PTHR10682 (PANTHER), PTHR10682:SF10 (PANTHER), SSF81301 (SUPERFAMILY), SSF81631 (SUPERFAMILY)
LCOR_01214.1	-1.44236	0.367964	93.7509	254.783	FALSE	0.0148827	hypothetical protein RO3G_02456	224	2	2.31191e-30	70.0%	0	0		IPR018466; SignalP-NN(euk) (SIGNALP), tmhmm (TMHMM)
LCOR_01215.1	-0.655135	0.635016	11.6845	18.4003	FALSE	0.845518	udp-n-acetylglucosamine--dolichyl-phosphate n-acetylglucosaminephosphotransferase	1066	20	1.8099e-114	68.9%	3	F:phospho-N-acetylmuramoyl-pentapeptide-transferase activity; C:integral to membrane; F:protein binding	EC:2.7.8.13	IPR000715; IPR001487; PTHR10571 (PANTHER), PTHR10571:SF0 (PANTHER), SignalP-NN(euk) (SIGNALP), tmhmm (TMHMM)
LCOR_01216.1	-0.495699	0.709218	6.05721	8.5407	FALSE	0.912546	adenylate cyclase	1840	20	0	62.2%	4	P:cyclic nucleotide biosynthetic process; F:phosphorus-oxygen lyase activity; P:intracellular signal transduction; F:protein binding	0	IPR000159; IPR001054; IPR001611; IPR001932; IPR003591; G3DSA:3.80.10.10 (GENE3D), PTHR23155 (PANTHER), PTHR23155:SF268 (PANTHER), PF13855 (PFAM), SM00364 (SMART), SSF52047 (SUPERFAMILY), SSF52058 (SUPERFAMILY)
LCOR_01217.1	0.585824	1.5009	17.0146	11.3363	TRUE	0.000200799	protein	772	20	1.25848e-170	71.35%	3	F:ATP binding; P:protein phosphorylation; F:protein tyrosine kinase activity	EC:2.7.10.0	IPR000719; IPR002290; IPR011009; IPR017441; IPR020635; G3DSA:1.10.510.10 (GENE3D), G3DSA:3.30.200.20 (GENE3D), PTHR24361 (PANTHER), PTHR24361:SF159 (PANTHER)
LCOR_01218.1	1.73978	3.33984	311.984	93.4128	TRUE	3.41907e-11	kinase family protein	758	20	0	72.5%	3	F:ATP binding; P:protein phosphorylation; F:protein tyrosine kinase activity	EC:2.7.10.0	IPR000719; IPR002290; IPR011009; IPR017441; IPR020635; G3DSA:1.10.510.10 (GENE3D), G3DSA:3.30.200.20 (GENE3D), PTHR24361 (PANTHER), PTHR24361:SF159 (PANTHER)
LCOR_01219.1	Inf	Inf	0.0827168	0	FALSE	0.206084	cationic amino acid transporter	515	20	5.26868e-114	57.15%	3	P:amino acid transmembrane transport; F:amino acid transmembrane transporter activity; C:membrane	0	IPR002293; IPR015606; PF13520 (PFAM), tmhmm (TMHMM)
LCOR_01220.1	-0.682839	0.622938	17.9999	28.8951	FALSE	0.901281	kynurenine alpha-aminoadipate mitochondrial-like	425	20	0	67.0%	3	P:biosynthetic process; F:pyridoxal phosphate binding; F:catalytic activity	0	IPR004839; IPR015421; IPR015422; IPR015424; PTHR11751 (PANTHER), PTHR11751:SF15 (PANTHER)
LCOR_01221.1	-0.371229	0.773123	0.466314	0.603155	FALSE	1	---NA---	158	0			0	0		SignalP-NN(euk) (SIGNALP)
LCOR_01222.1	-0.835247	0.560487	13.8879	24.7784	FALSE	0.451786	mgc107853 protein	479	20	6.57697e-114	48.6%	3	F:nucleoside transmembrane transporter activity; P:transport; C:integral to membrane	0	IPR002259; tmhmm (TMHMM)
LCOR_01223.1	-0.742111	0.597864	134.883	225.608	FALSE	0.698654	---NA---	209	0			3	F:copper ion transmembrane transporter activity; C:integral to membrane; P:copper ion transmembrane transport	0	IPR007274; tmhmm (TMHMM)
LCOR_01224.1	0.385764	1.30655	32.6884	25.0188	TRUE	0.00568026	---NA---	501	0			0	0		no IPS match
LCOR_01225.1	0.54636	1.4604	0.297758	0.203888	FALSE	0.337672	---NA---	772	0			0	0		no IPS match
LCOR_01226.1	-0.133704	0.911488	3.53279	3.87585	FALSE	0.379049	kinesin-domain-containing protein	791	20	4.76658e-153	72.05%	4	F:microtubule motor activity; F:ATP binding; C:microtubule associated complex; P:microtubule-based movement	0	IPR001752; IPR019821; IPR027417; PTHR24115 (PANTHER), PTHR24115:SF114 (PANTHER)
LCOR_01227.1	-1.23612	0.424512	4.18565	9.85991	FALSE	0.036512	amp binding domain	1915	20	0	57.5%	4	F:catalytic activity; P:metabolic process; C:nucleus; F:transcription factor binding	0	IPR000873; IPR010506; G3DSA:2.30.38.10 (GENE3D), G3DSA:3.40.50.980 (GENE3D), PTHR22754 (PANTHER), PTHR22754:SF8 (PANTHER), SSF56801 (SUPERFAMILY)
LCOR_01228.1	0.34929	1.27393	27.1021	21.2743	FALSE	0.0307148	---NA---	107	0			0	0		PTHR11360 (PANTHER), tmhmm (TMHMM)
LCOR_01229.1	0.332399	1.2591	30.4275	24.166	TRUE	0.00604094	mfs transporter	362	20	1.45007e-111	61.9%	2	C:integral to membrane; P:transmembrane transport	0	IPR011701; IPR016196; IPR020846; G3DSA:1.20.1250.20 (GENE3D), PTHR11360 (PANTHER), SignalP-NN(euk) (SIGNALP), tmhmm (TMHMM)
LCOR_01231.1	-1.13437	0.455532	15.6344	34.3211	FALSE	0.0782931	and tpr domain protein	528	20	0	59.05%	1	F:protein binding	0	IPR001440; IPR001623; IPR011990; IPR013026; IPR019734; IPR026901; PTHR24078 (PANTHER), PF13371 (PFAM), PF13414 (PFAM), PF13428 (PFAM), SignalP-NN(euk) (SIGNALP), SSF48452 (SUPERFAMILY)
LCOR_01232.1	-1.64486	0.319778	73.4651	229.738	FALSE	0.0180834	pathogenesis-related protein 1-like protein	158	20	9.92073e-52	62.7%	1	C:extracellular region	0	IPR001283; IPR014044; IPR018244; SignalP-NN(euk) (SIGNALP)
LCOR_01233.1	-1.10019	0.466455	8.79457	18.854	FALSE	0.235597	---NA---	160	0			0	0		IPR026721; tmhmm (TMHMM)
LCOR_01234.1	-1.22304	0.428378	0.549249	1.28216	FALSE	0.437651	-like protein	376	20	3.17217e-84	60.0%	3	F:zinc ion binding; F:oxidoreductase activity; P:oxidation-reduction process	0	IPR002085; IPR002328; IPR011032; IPR013149; IPR013154; IPR016040; IPR020843; PTHR11695:SF38 (PANTHER), SSF51735 (SUPERFAMILY)
LCOR_01235.1	1.02025	2.02827	7.07678	3.48907	FALSE	0.0149568	---NA---	87	0			0	0		no IPS match
LCOR_01236.1	2.17718	4.52269	34.15	7.55081	TRUE	3.96238e-11	transcriptional regulator prz1	294	10	1.09732e-45	77.2%	2	F:zinc ion binding; F:nucleic acid binding	0	IPR007087; IPR013087; IPR015880; PTHR11389 (PANTHER), PF13465 (PFAM), SSF57667 (SUPERFAMILY)
LCOR_01237.1	-0.479301	0.717325	29.9236	41.7155	FALSE	0.922446	---NA---	226	0			0	0		no IPS match
LCOR_01238.1	0.724261	1.65205	16.6887	10.1018	TRUE	0.00148408	upf0712 protein c7orf64-like protein	178	5	6.25466e-29	69.8%	2	F:nucleic acid binding; F:nucleotide binding	0	IPR000504; IPR012677; PTHR20957 (PANTHER), PF13893 (PFAM), SSF54928 (SUPERFAMILY)
LCOR_01239.1	-0.0365589	0.974978	109.238	112.042	FALSE	0.141338	sh3 domain-containing protein	480	20	3.11394e-44	59.95%	1	F:protein binding	0	IPR001452; IPR007461; G3DSA:2.30.30.40 (GENE3D), PTHR15629 (PANTHER)
LCOR_01240.1	1.2605	2.39578	1069.23	446.298	TRUE	1.41322e-07	---NA---	404	0			0	0		no IPS match
LCOR_01241.1	-1.02431	0.491644	4.82	9.80384	FALSE	0.21065	ubiquitin-protein cullin 4	808	20	5.02543e-178	60.35%	3	P:ubiquitin-dependent protein catabolic process; C:cullin-RING ubiquitin ligase complex; F:ubiquitin protein ligase binding	0	IPR001373; IPR011991; IPR016158; IPR016159; IPR019559; G3DSA:1.20.1310.10 (GENE3D), G3DSA:4.10.1030.10 (GENE3D), PTHR11932 (PANTHER), PTHR11932:SF22 (PANTHER), SSF46785 (SUPERFAMILY)
LCOR_01242.1	1.35365	2.55557	0.130843	0.051199	FALSE	0.318314	zinc finger with ufm1-specific peptidase domain protein	394	20	6.25474e-54	56.4%	6	F:metal ion binding; F:molecular_function; P:biological_process; F:zinc ion binding; C:cellular_component; C:intracellular		IPR012462; PTHR13226 (PANTHER), PTHR13226:SF14 (PANTHER)
LCOR_01243.1	-1.22663	0.427314	9.01613	21.0995	FALSE	0.0558694	atp synthase regulation protein nca2	641	20	1.16441e-110	51.0%	4	F:GTP binding; P:small GTPase mediated signal transduction; F:nucleotide binding; P:protein transport		IPR013946; PTHR10270 (PANTHER), PTHR10270:SF23 (PANTHER), tmhmm (TMHMM)
LCOR_01244.1	0.0638531	1.04525	20.1189	19.2479	FALSE	0.094609	-domain-containing protein	279	20	1.08937e-51	58.7%	3	F:unfolded protein binding; P:protein folding; F:heat shock protein binding		IPR001623; IPR018253; PTHR24078 (PANTHER)
LCOR_01245.1	-2.07745	0.236932	108.314	457.152	TRUE	4.64791e-05	hypothetical protein RO3G_11503	300	7	2.77726e-74	73.71%	1	F:protein dimerization activity	0	IPR011598; PTHR15741 (PANTHER)
LCOR_01246.1	-0.607854	0.656172	13.7098	20.8936	FALSE	0.951969	potential opt family transporter	738	20	0	60.55%	1	P:transmembrane transport	0	IPR004813; PTHR31645 (PANTHER), PTHR31645:SF0 (PANTHER), SignalP-NN(euk) (SIGNALP), tmhmm (TMHMM)
LCOR_01247.1	-0.725223	0.604903	6.65456	11.001	FALSE	0.771524	---NA---	251	0			2	C:nucleus; P:mitosis	0	IPR008685
LCOR_01248.1	1.15863	2.23246	234.966	105.25	TRUE	4.94608e-07	pentatricopeptide repeat protein	1167	20	0	52.0%	1	F:protein binding	0	IPR002885; IPR011990; PTHR24015 (PANTHER), SSF81901 (SUPERFAMILY)
LCOR_01249.1	-0.74064	0.598474	135.798	226.907	FALSE	0.703548	---NA---	477	0			2	F:sequence-specific DNA binding transcription factor activity; C:transcription factor complex	0	IPR003316; IPR011991; IPR015648; SSF46785 (SUPERFAMILY)
LCOR_01250.1	0.188635	1.13968	14.5492	12.766	FALSE	0.0286206	threonine ammonia- biosynthetic	543	20	0	73.95%	3	F:pyridoxal phosphate binding; F:L-threonine ammonia-lyase activity; P:isoleucine biosynthetic process	EC:4.3.1.19	IPR000634; IPR001721; IPR001926; IPR005787; G3DSA:3.40.1020.10 (GENE3D), G3DSA:3.40.50.1100 (GENE3D), PTHR10314 (PANTHER), PTHR10314:SF30 (PANTHER), SSF55021 (SUPERFAMILY)
LCOR_01251.1	-0.0654865	0.955623	0.0233863	0.0244723	FALSE	1	---NA---	385	0			0	0		no IPS match
LCOR_01252.1	-0.615183	0.652847	9.7638	14.9557	FALSE	0.912494	alpha-( )-fucosyltransferase 11	424	20	3.33698e-95	50.95%	3	P:protein glycosylation; F:fucosyltransferase activity; C:membrane	0	IPR001503; tmhmm (TMHMM)
LCOR_01253.1	-1.6995	0.307893	10.4275	33.8672	TRUE	0.000818757	udp-glc gal endoplasmic reticulum nucleotide sugar transporter	346	20	8.62891e-176	63.55%	1	P:transmembrane transport	0	IPR013657; PTHR10778 (PANTHER), PTHR10778:SF10 (PANTHER), SignalP-NN(euk) (SIGNALP), tmhmm (TMHMM), SSF103481 (SUPERFAMILY)
LCOR_01254.1	-1.07138	0.475862	2.09874	4.41039	FALSE	0.283562	adenylate cyclase	658	20	0	62.1%	3	P:cyclic nucleotide biosynthetic process; F:phosphorus-oxygen lyase activity; P:intracellular signal transduction	0	IPR001054; IPR001932; IPR015655
LCOR_01255.1	-1.03146	0.489216	1.68961	3.45371	FALSE	0.703147	---NA---	70	0			0	0		SignalP-NN(euk) (SIGNALP)
LCOR_01256.1	0.348029	1.27282	0.961311	0.755261	FALSE	0.286663	---NA---	359	0			2	P:DNA repair; P:DNA recombination	0	IPR007232; PTHR12132:SF1 (PANTHER), SSF54768 (SUPERFAMILY)
LCOR_01257.1	0.148962	1.10877	65.3876	58.973	FALSE	0.0463524	---NA---	95	0			0	0		no IPS match
LCOR_01258.1	-1.05867	0.480075	6.57285	13.6913	FALSE	0.129154	hypothetical protein RO3G_01681	1997	2	0	65.5%	1	F:catalytic activity	0	IPR001932; IPR010095; IPR015655
LCOR_01259.1	-0.354981	0.78188	91.8779	117.509	FALSE	0.586839	dolichol-phosphate mannosyltransferase	274	20	2.32359e-156	84.5%	2	F:transferase activity; F:transferase activity, transferring glycosyl groups		IPR001173; G3DSA:3.90.550.10 (GENE3D), PTHR10859 (PANTHER), SSF53448 (SUPERFAMILY)
LCOR_01260.1	-0.25921	0.835545	0.885466	1.05975	FALSE	0.921611	hypothetical protein RO3G_07962	182	2	2.88038e-29	86.5%	1	F:protein dimerization activity	0	IPR011598; PTHR15741 (PANTHER), PTHR15741:SF12 (PANTHER)
LCOR_01261.1	-1.00822	0.497158	8.68418	17.4676	FALSE	0.300731	-domain-containing protein	295	20	5.63355e-150	65.8%	0	0		IPR008775; G3DSA:2.60.120.620 (GENE3D), SSF51197 (SUPERFAMILY)
LCOR_01262.1	0.285065	1.21846	38.2887	31.4237	FALSE	0.0123407	mitochondrial ornithine acetyltransferase	442	20	0	69.9%	2	F:glutamate N-acetyltransferase activity; P:arginine biosynthetic process	EC:2.3.1.35	IPR002813; IPR016117
LCOR_01263.1	-1.21808	0.429853	59.3698	138.116	FALSE	0.0534339	phosphoacetylglucosamine mutase	546	20	0	74.3%	3	P:carbohydrate metabolic process; F:magnesium ion binding; F:phosphoacetylglucosamine mutase activity	EC:5.4.2.3	IPR005843; IPR005844; IPR005845; IPR016055; IPR016066; IPR016657; G3DSA:3.30.310.50 (GENE3D), PTHR22573 (PANTHER), SSF55957 (SUPERFAMILY)
LCOR_01264.1	-0.767733	0.58734	10.8681	18.5039	FALSE	0.621191	endoplasmic reticulum metallopeptidase 1	919	20	0	53.3%	2	P:proteolysis; F:peptidase activity	0	IPR007484; G3DSA:3.40.630.10 (GENE3D), PTHR12147 (PANTHER), PTHR12147:SF6 (PANTHER), tmhmm (TMHMM), SSF53187 (SUPERFAMILY)
LCOR_01265.1	-1.21191	0.431697	36.5172	84.5899	FALSE	0.0463524	gdp-mannose transporter	378	20	2.23234e-174	78.45%	3	F:nucleotide-sugar transmembrane transporter activity; P:nucleotide-sugar transport; C:integral to membrane	0	IPR004689; IPR004853; PTHR11132 (PANTHER), tmhmm (TMHMM), SSF103481 (SUPERFAMILY)
LCOR_01266.1	-1.51591	0.349675	5.88224	16.822	FALSE	0.010961	---NA---	297	0			0	0		no IPS match
LCOR_01267.1	-1.6942	0.309027	2.92628	9.46935	TRUE	0.0015403	ubiquitin carboxyl-terminal hydrolase 11	1119	20	1.57453e-146	58.0%	2	F:ubiquitin thiolesterase activity; P:ubiquitin-dependent protein catabolic process	EC:3.1.2.15	IPR001394; IPR006615; IPR018200; G3DSA:3.30.2230.10 (GENE3D), PTHR24006 (PANTHER), PTHR24006:SF24 (PANTHER), SSF143791 (SUPERFAMILY), SSF54001 (SUPERFAMILY)
LCOR_01268.1	1.38677	2.61492	0.0688864	0.0263436	FALSE	1	protein transport protein	326	2	3.32071e-43	62.0%	1	F:protein binding	0	IPR000727; G3DSA:1.20.5.110 (GENE3D), PTHR19305 (PANTHER), PTHR19305:SF0 (PANTHER)
LCOR_01269.1	-1.22614	0.42746	6.4522	15.0943	FALSE	0.0684241	pseudouridylate synthase	483	20	2.26414e-149	61.05%	3	P:pseudouridine synthesis; F:RNA binding; F:pseudouridine synthase activity	EC:5.4.99.12	IPR001406; IPR020094; IPR020095; IPR020097; IPR020103
LCOR_01271.1	-1.36519	0.388183	8.62028	22.2067	FALSE	0.0246739	ankyrin repeats (3 copies) domain-containing protein	338	19	1.05944e-110	57.68%	1	F:protein binding	0	IPR002110; IPR020683; PTHR24193 (PANTHER)
LCOR_01272.1	0.486374	1.40092	1.27811	0.912337	FALSE	0.230514	guanine nucleotide binding protein beta subunit 2	348	20	0	86.25%	1	F:protein binding	0	IPR001632; IPR001680; IPR015943; IPR016346; IPR017986; IPR019775; IPR020472; PTHR19850 (PANTHER)
LCOR_01273.1	-0.91194	0.53147	4.72954	8.89898	FALSE	0.466732	sumo ligase	467	20	5.1928e-46	54.65%	2	F:zinc ion binding; F:SUMO ligase activity	0	IPR004181; IPR013083; IPR023321; IPR027229; PTHR10782 (PANTHER)
LCOR_01274.1	-0.702758	0.614396	20.4504	33.2853	FALSE	0.759614	---NA---	1514	0			0	0		IPR009053
LCOR_01275.1	-0.0316338	0.978312	50.823	51.9497	FALSE	0.133558	lipase esterase family protein	632	20	5.02164e-74	49.9%	2	P:metabolic process; F:hydrolase activity	0	IPR002168; IPR013094; G3DSA:3.40.50.1820 (GENE3D), PTHR23024 (PANTHER), PTHR23024:SF54 (PANTHER), SSF53474 (SUPERFAMILY)
LCOR_01276.1	-0.218535	0.859438	71.1538	82.7911	FALSE	0.30141	---NA---	137	0			1	F:protein binding	0	IPR015362; PTHR22959 (PANTHER), PTHR22959:SF0 (PANTHER)
LCOR_01277.1	2.55283	5.86785	0.40827	0.0695775	TRUE	5.85154e-05	acetyl- synthetase-like protein	1054	20	0	51.8%	3	F:catalytic activity; P:metabolic process; F:phosphopantetheine binding	0	IPR000873; IPR006162; IPR009081; IPR013120; IPR016040; IPR020806; IPR020845; G3DSA:3.40.50.980 (GENE3D), PTHR24095 (PANTHER), PTHR24095:SF30 (PANTHER), SSF51735 (SUPERFAMILY), SSF56801 (SUPERFAMILY)
LCOR_01278.1	-0.699079	0.615965	6.80607	11.0494	FALSE	0.704946	sel1 repeat protein	1684	20	0	44.5%	1	F:protein binding	0	IPR006597; IPR011990; PTHR11102 (PANTHER), SSF81901 (SUPERFAMILY)
LCOR_01279.1	-0.488535	0.712749	7.21428	10.1218	FALSE	0.899743	4-hydroxybenzoate mitochondrial	375	20	5.56723e-147	66.65%	3	F:prenyltransferase activity; C:integral to membrane; P:ubiquinone biosynthetic process	0	IPR000537; IPR006370; PTHR11048 (PANTHER), PTHR11048:SF2 (PANTHER), tmhmm (TMHMM)
LCOR_01280.1	-0.13109	0.913142	99.5239	108.991	FALSE	0.216898	hypothetical protein RO3G_10065	308	1	1.16543e-90	82.0%	0	0		IPR000772; G3DSA:2.80.10.50 (GENE3D)
LCOR_01281.1	-1.08283	0.472103	6.74417	14.2854	FALSE	0.11938	related to cytokinesis protein sepa	1374	20	8.04986e-142	58.7%	3	F:actin binding; P:actin cytoskeleton organization; F:Rho GTPase binding	0	IPR003104; IPR010472; IPR010473; IPR014767; IPR014768; IPR015425; IPR016024; PR01217 (PRINTS), PTHR23213 (PANTHER)
LCOR_01282.1	-0.914548	0.53051	25.9518	48.9186	FALSE	0.349106	cleavage and polyadenylation specific factor 5	199	20	4.67469e-110	82.2%	3	F:mRNA binding; C:mRNA cleavage factor complex; P:mRNA polyadenylation	0	IPR016706; PTHR13047:SF0 (PANTHER)
LCOR_01283.1	-0.87119	0.546696	27.5405	50.3763	FALSE	0.375627	transcriptional repressor rco-1	648	20	9.2485e-178	74.55%	1	F:protein binding	0	IPR001680; IPR013890; IPR015943; IPR017986; IPR019775; IPR020472; PTHR22847 (PANTHER), PTHR22847:SF140 (PANTHER)
LCOR_01284.1	1.25804	2.39171	0.0963493	0.0402846	FALSE	0.802281	---NA---	232	0			0	0		no IPS match
LCOR_01285.1	0.492981	1.40735	0.346891	0.246485	FALSE	0.724801	---NA---	148	0			0	0		no IPS match
LCOR_01286.1	-1.6543	0.317692	4.19229	13.1961	FALSE	0.0127569	---NA---	240	0			3	F:RNA polymerase II transcription cofactor activity; P:regulation of transcription from RNA polymerase II promoter; C:mediator complex	0	IPR019258
LCOR_01287.1	-1.04321	0.485247	832.049	1714.69	FALSE	0.277193	potassium transporter	738	20	0	62.2%	3	F:potassium ion transmembrane transporter activity; C:membrane; P:potassium ion transmembrane transport	0	IPR003855; PTHR30540 (PANTHER), PTHR30540:SF0 (PANTHER), tmhmm (TMHMM)
LCOR_01288.1	-1.30392	0.405025	125.964	311.004	FALSE	0.0247796	hypothetical protein RO3G_02323	158	4	6.50481e-34	66.0%	0	0		IPR000772; G3DSA:2.80.10.50 (GENE3D)
LCOR_01289.1	-0.0373981	0.974411	6.35187	6.51868	FALSE	0.336845	hypothetical protein RO3G_11864	526	1	4.51823e-101	66.0%	0	0		SignalP-NN(euk) (SIGNALP), tmhmm (TMHMM)
LCOR_01290.1	0.987805	1.98317	40.7993	20.5728	TRUE	5.45823e-07	f-box and wd repeat-containing protein	559	20	0	64.5%	1	F:protein binding	0	IPR001680; IPR001810; IPR015943; IPR017986; IPR019775; IPR020472; G3DSA:1.20.1280.50 (GENE3D), PTHR22844 (PANTHER), PTHR22844:SF75 (PANTHER), PF12937 (PFAM)
LCOR_01291.1	0.0583668	1.04129	498.952	479.169	FALSE	0.0987381	hypothetical protein RO3G_05663	396	2	1.30049e-28	63.5%	1	F:protein binding	0	IPR000008; IPR008973; IPR018029; G3DSA:2.60.40.150 (GENE3D), PTHR10774 (PANTHER)
LCOR_01292.1	-0.134205	0.911172	750.304	823.45	FALSE	0.232303	60s ribosomal protein l9	189	20	1.70128e-98	78.1%	4	F:structural constituent of ribosome; C:ribosome; P:translation; F:rRNA binding	0	IPR000702; IPR002359; IPR020040; PTHR11655:SF2 (PANTHER)
LCOR_01293.1	-0.327147	0.797111	10.2167	12.8171	FALSE	0.5578	hypothetical protein RO3G_11876	548	1	6.28208e-106	62.0%	3	F:zinc ion binding; F:chromatin binding; F:DNA binding	0	IPR000433; IPR001005; IPR009057; IPR017930; PTHR22705 (PANTHER)
LCOR_01294.1	-1.79036	0.289099	1.61173	5.57502	FALSE	0.0292077	---NA---	226	0			0	0		no IPS match
LCOR_01295.1	-0.959589	0.514203	31.8716	61.9824	FALSE	0.221559	---NA---	275	0			0	0		no IPS match
LCOR_01296.1	-1.5744	0.335782	11.0359	32.8663	FALSE	0.013753	hypothetical protein RO3G_11136	178	3	1.52448e-45	59.0%	1	F:N-acetyltransferase activity	0	IPR000182; IPR016181; PTHR23091 (PANTHER)
LCOR_01297.1	-0.558807	0.678863	8.20432	12.0854	FALSE	1	mannan polymerase ii complex anp1 subunit	351	20	1.49521e-56	53.65%	10	F:transferase activity; F:transferase activity, transferring glycosyl groups; C:endoplasmic reticulum membrane; F:molecular_function; C:integral to membrane; P:negative regulation of G0 to G1 transition; C:membrane; C:endoplasmic reticulum; C:Golgi apparatus; C:Golgi membrane		IPR005109; PTHR31041 (PANTHER), PTHR31041:SF0 (PANTHER), SignalP-NN(euk) (SIGNALP), tmhmm (TMHMM)
LCOR_01298.1	1.08101	2.11552	2194.47	1037.32	TRUE	1.04296e-05	---NA---	158	0			0	0		IPR002068; IPR008978; G3DSA:2.60.40.790 (GENE3D), PTHR11527 (PANTHER), PTHR11527:SF15 (PANTHER)
LCOR_01299.1	-0.421993	0.746393	0.0997046	0.133582	FALSE	1	endothelin-converting enzyme	745	20	0	53.35%	2	F:metalloendopeptidase activity; P:proteolysis	EC:3.4.24.0	IPR000718; IPR008753; IPR018497; IPR024079; SSF55486 (SUPERFAMILY)
LCOR_01300.1	-0.946892	0.518749	8.68748	16.747	FALSE	0.257234	---NA---	699	0			1	F:protein binding	0	IPR006553; IPR011990; G3DSA:3.80.10.10 (GENE3D), PTHR23125 (PANTHER), SSF48452 (SUPERFAMILY), SSF52047 (SUPERFAMILY)
LCOR_01303.1	-1.10849	0.463779	7.04052	15.1808	FALSE	0.0902993	hypothetical protein RO3G_14961	1934	20	0	43.7%	3	F:RNA polymerase II transcription cofactor activity; P:regulation of transcription from RNA polymerase II promoter; C:mediator complex	0	IPR019035; IPR021990; PTHR22795 (PANTHER), PTHR22795:SF1 (PANTHER)
LCOR_01304.1	-3.61985	0.0813425	3.92838	48.2942	TRUE	1.53592e-09	---NA---	233	0			0	0		no IPS match
LCOR_01305.1	-0.740495	0.598534	0.0273507	0.0456961	FALSE	1	allantoin permease	409	20	2.67357e-94	53.95%	2	C:integral to membrane; P:transmembrane transport	0	IPR011701; IPR016196; IPR020846; G3DSA:1.20.1250.20 (GENE3D), PTHR11662 (PANTHER), PTHR11662:SF4 (PANTHER), SignalP-NN(euk) (SIGNALP), tmhmm (TMHMM)
LCOR_01306.1	1.2486	2.3761	0.139918	0.0588857	FALSE	0.315501	hypothetical protein RO3G_06829	465	2	1.47179e-99	71.0%	2	P:carbohydrate metabolic process; F:catalytic activity	0	IPR002509; IPR011330; SignalP-NN(euk) (SIGNALP)
LCOR_01308.1	-Inf	0	0	0.388778	FALSE	0.698654	---NA---	68	0			0	0		no IPS match
LCOR_01309.1	Inf	Inf	0.0710869	0	FALSE	1	---NA---	126	0			0	0		no IPS match
LCOR_01310.1	0.85879	1.81352	3.2924	1.81548	FALSE	0.0173666	nad+ dependent glutamate	1021	20	0	76.35%	3	P:oxidation-reduction process; F:glutamate dehydrogenase (NAD+) activity; P:glutamate catabolic process to 2-oxoglutarate	EC:1.4.1.2	IPR006096; IPR016040; IPR016210; G3DSA:3.40.192.10 (GENE3D), PTHR11606 (PANTHER), PTHR11606:SF1 (PANTHER), SSF51735 (SUPERFAMILY), SSF53223 (SUPERFAMILY)
LCOR_01311.1	0.153005	1.11188	71.1068	63.9517	FALSE	0.0314717	late endosome to vacuole transport-related protein	350	20	9.4074e-76	67.7%	0	0		IPR023175; G3DSA:1.20.5.420 (GENE3D), PTHR12741 (PANTHER), PF04652 (PFAM)
LCOR_01312.1	-0.582309	0.667894	66.8605	100.106	FALSE	0.997614	cop9 signalosome complex subunit 2 isoform 1	443	20	0	79.2%	1	F:protein binding	0	IPR000717; IPR011990; IPR011991; IPR013143; PTHR10678 (PANTHER), PTHR10678:SF3 (PANTHER), SSF46785 (SUPERFAMILY)
LCOR_01313.1	-0.545983	0.684925	22.7086	33.1549	FALSE	1	regulatory-associated protein of mtor isoform 1	1426	20	0	68.9%	3	F:protein binding; P:TOR signaling cascade; C:TORC1 complex	0	IPR001680; IPR004083; IPR011989; IPR015943; IPR016024; IPR017986; IPR019775; PF13646 (PFAM)
LCOR_01314.1	-0.951347	0.517149	9.62696	18.6154	FALSE	0.345877	family protein	407	20	1.32319e-97	64.2%	4	F:protein binding; P:carbohydrate metabolic process; F:carbohydrate binding; F:isomerase activity	0	IPR000644; IPR001347; IPR004800; G3DSA:3.10.580.10 (GENE3D), G3DSA:3.40.50.10490 (GENE3D), PTHR30550 (PANTHER), PTHR30550:SF0 (PANTHER), SSF53697 (SUPERFAMILY), SSF54631 (SUPERFAMILY)
LCOR_01315.1	Inf	Inf	0.339851	0	FALSE	0.321873	---NA---	98	0			0	0		no IPS match
LCOR_01316.1	0.154791	1.11326	0.0592905	0.0532584	FALSE	0.858534	hormone-sensitive lipase	568	20	1.06911e-170	58.5%	2	P:metabolic process; F:hydrolase activity	0	IPR013094; G3DSA:3.40.50.1820 (GENE3D), PTHR23024 (PANTHER), SignalP-NN(euk) (SIGNALP), SSF53474 (SUPERFAMILY)
LCOR_01317.1	-0.592577	0.663157	11.8844	17.9209	FALSE	0.996787	splicing factor 45	554	20	5.55289e-73	63.2%	2	F:nucleic acid binding; F:nucleotide binding	0	IPR000467; IPR000504; IPR003954; IPR012677; PTHR13288 (PANTHER), PTHR13288:SF8 (PANTHER), SSF54928 (SUPERFAMILY)
LCOR_01318.1	-0.912141	0.531396	589.185	1108.75	FALSE	0.468957	40s ribosomal protein s9	190	20	1.06856e-103	95.0%	4	F:rRNA binding; F:structural constituent of ribosome; P:translation; C:small ribosomal subunit	0	IPR001912; IPR002942; IPR005710; IPR018079; IPR022801; PTHR11831:SF3 (PANTHER), SSF55174 (SUPERFAMILY)
LCOR_01319.1	-0.743533	0.597275	364.974	611.065	FALSE	0.737264	60s ribosomal protein l21-a	160	20	9.57884e-95	85.4%	3	F:structural constituent of ribosome; C:ribosome; P:translation	0	IPR001147; IPR008991; IPR018259; G3DSA:2.30.30.70 (GENE3D), PTHR20981:SF0 (PANTHER)
LCOR_01320.1	-0.273766	0.827157	14.8149	17.9106	FALSE	0.624432	---NA---	162	0			1	F:phosphatidylinositol N-acetylglucosaminyltransferase activity	EC:2.4.1.198	IPR019328; PTHR15231 (PANTHER), SignalP-NN(euk) (SIGNALP), tmhmm (TMHMM)
LCOR_01321.1	-2.11614	0.230663	2.00263	8.68206	TRUE	0.00708591	related to spt23-suppressor of ty retrotransposon	653	11	2.2299e-48	64.0%	1	F:protein binding	0	IPR002909; IPR013783; IPR014756; PTHR22625 (PANTHER)
LCOR_01322.1	0.424466	1.34208	951.742	709.157	TRUE	0.00341724	aspartate aminotransferase	406	20	0	75.9%	4	P:cellular amino acid metabolic process; F:transaminase activity; P:biosynthetic process; F:pyridoxal phosphate binding	EC:2.6.1.0	IPR000796; IPR004838; IPR004839; IPR015421; IPR015424; PTHR11879:SF0 (PANTHER)
LCOR_01323.1	0.256727	1.19476	3.46401	2.89933	FALSE	0.0555498	---NA---	702	0			0	0		no IPS match
LCOR_01324.1	0.818385	1.76343	81.3125	46.1104	TRUE	0.00021574	---NA---	70	0			0	0		SignalP-NN(euk) (SIGNALP)
LCOR_01325.1	-0.764569	0.588629	88.0443	149.575	FALSE	0.698654	---NA---	260	0			1	F:protein binding	0	IPR001810; G3DSA:1.20.1280.50 (GENE3D), PF12937 (PFAM)
LCOR_01326.1	-1.64594	0.319537	37.9948	118.906	TRUE	0.00148386	trehalose-phosphatase	675	20	2.13564e-68	52.85%	2	F:catalytic activity; P:trehalose biosynthetic process	0	IPR001830; IPR003337; IPR006379; IPR023214; G3DSA:3.40.50.2000 (GENE3D), PTHR10788 (PANTHER), PTHR10788:SF6 (PANTHER), SSF53756 (SUPERFAMILY)
LCOR_01327.1	-1.2515	0.420011	15.0811	35.9065	FALSE	0.0367087	methionine aminopeptidase 1	356	20	0	79.05%	5	P:cellular process; F:aminopeptidase activity; P:proteolysis; F:metalloexopeptidase activity; F:zinc ion binding	EC:3.4.11.0	IPR000994; IPR001714; IPR002467; IPR002893; PTHR10804 (PANTHER), PTHR10804:SF13 (PANTHER)
LCOR_01328.1	-0.974417	0.508946	11.5138	22.6229	FALSE	0.246064	activating signal cointegrator 1 complex subunit 1-like	347	16	2.56708e-31	50.0%	4	F:RNA binding; F:catalytic activity; P:RNA metabolic process; C:cytoplasm	0	IPR004087; IPR004088; IPR009097; IPR009210; IPR019510; G3DSA:3.30.1370.10 (GENE3D), PTHR13360 (PANTHER), SSF54791 (SUPERFAMILY)
LCOR_01329.1	0.782153	1.7197	50.9182	29.6089	TRUE	3.02837e-05	---NA---	344	0			1	F:protein dimerization activity	0	IPR011598; PTHR12565 (PANTHER)
LCOR_01330.1	0.169967	1.12503	124.169	110.369	FALSE	0.0292356	izh family channel protein	460	20	2.77954e-172	53.25%	1	C:integral to membrane	0	IPR004254; PTHR20855:SF10 (PANTHER), tmhmm (TMHMM)
LCOR_01331.1	-0.291534	0.817033	84.6934	103.66	FALSE	0.48375	lipase	318	20	5.65324e-68	62.8%	2	P:metabolic process; F:hydrolase activity	0	IPR013094; G3DSA:3.40.50.1820 (GENE3D), PTHR23024 (PANTHER), SSF53474 (SUPERFAMILY)
LCOR_01332.1	-3.54354	0.0857608	9.5745	111.642	TRUE	5.18791e-11	general substrate transporter	536	20	0	67.4%	3	F:substrate-specific transmembrane transporter activity; P:transmembrane transport; C:integral to membrane	0	IPR003663; IPR005828; IPR005829; IPR016196; IPR020846; G3DSA:1.20.1250.20 (GENE3D), PTHR24063 (PANTHER), PTHR24063:SF125 (PANTHER), tmhmm (TMHMM)
LCOR_01333.1	-1.23749	0.424111	2.30377	5.432	FALSE	0.361968	---NA---	110	0			0	0		IPR013907; PTHR21964 (PANTHER), PTHR21964:SF2 (PANTHER)
LCOR_01334.1	-0.593697	0.662643	2.53844	3.83079	FALSE	1	---NA---	77	0			0	0		IPR008462
LCOR_01335.1	-0.700136	0.615514	7.06034	11.4706	FALSE	0.799084	hypothetical protein RO3G_14603	586	1	3.90771e-36	82.0%	0	0		IPR009071; PTHR13711 (PANTHER), PTHR13711:SF39 (PANTHER)
LCOR_01336.1	0.682093	1.60447	40.5803	25.2921	TRUE	0.000196261	rni-like protein	897	20	1.48717e-31	58.15%	2	C:intracellular; P:intracellular protein transport	0	IPR003590; IPR004152; G3DSA:1.20.58.160 (GENE3D), G3DSA:3.80.10.10 (GENE3D), PTHR24112 (PANTHER), SSF52047 (SUPERFAMILY), SSF89009 (SUPERFAMILY)
LCOR_01337.1	-1.16273	0.446666	0.134112	0.300252	FALSE	0.770993	---NA---	534	0			1	F:protein binding	0	IPR001611; IPR003591; IPR025875; G3DSA:3.80.10.10 (GENE3D), PTHR23155 (PANTHER), PF13504 (PFAM), PF13855 (PFAM), SM00364 (SMART), SSF52047 (SUPERFAMILY)
LCOR_01338.1	-0.306212	0.808762	57.1859	70.7079	FALSE	0.458253	transcription factor tfiib	339	20	0	72.15%	2	F:zinc ion binding; F:TBP-class protein binding	0	IPR000812; IPR013137; IPR013150; IPR013763; IPR023486; G3DSA:2.20.25.10 (GENE3D), PTHR11618:SF13 (PANTHER), SSF57783 (SUPERFAMILY)
LCOR_01339.1	1.41376	2.66431	116.331	43.6627	TRUE	5.09368e-09	yip1-domain-containing protein	258	20	8.74158e-69	73.2%	1	C:membrane		PTHR21236 (PANTHER), PTHR21236:SF2 (PANTHER), tmhmm (TMHMM)
LCOR_01340.1	-1.64697	0.319311	3.90739	12.237	FALSE	0.0667873	mfs siderophore iron	592	20	0	80.95%	2	C:integral to membrane; P:transmembrane transport	0	IPR011701; IPR016196; IPR020846; G3DSA:1.20.1250.20 (GENE3D), PTHR24003 (PANTHER), PTHR24003:SF194 (PANTHER), tmhmm (TMHMM)
LCOR_01341.1	0.91299	1.88294	82.9217	44.0384	TRUE	0.000143875	---NA---	86	0			0	0		tmhmm (TMHMM)
LCOR_01342.1	-1.39557	0.380094	50.5926	133.106	FALSE	0.0119806	rna-binding protein nhp2	161	20	3.24015e-77	79.05%	4	F:RNA binding; C:nucleolus; C:ribonucleoprotein complex; P:ribosome biogenesis	0	IPR002415; IPR004037; IPR004038; IPR018492; G3DSA:3.30.1330.30 (GENE3D), PTHR23105 (PANTHER), PTHR23105:SF12 (PANTHER), SSF55315 (SUPERFAMILY)
LCOR_01343.1	-1.20229	0.434585	19.8957	45.7809	FALSE	0.084627	hypothetical protein RO3G_12804	224	1	2.85791e-56	78.0%	2	F:structural constituent of ribosome; C:mitochondrial small ribosomal subunit	0	IPR016939
LCOR_01344.1	-1.63517	0.321932	5.99653	18.6267	TRUE	0.00315832	wd40 repeat-like protein	383	20	9.26894e-166	66.0%	1	F:protein binding	0	IPR001680; IPR015943; IPR017986; PTHR11227 (PANTHER), PTHR11227:SF17 (PANTHER)
LCOR_01345.1	-0.719272	0.607404	3.02442	4.97926	FALSE	0.766612	arm repeat-containing protein	660	20	0	49.9%	1	F:RNA binding	0	IPR001313; IPR011989; IPR016024; PTHR13102 (PANTHER), PTHR13102:SF0 (PANTHER)
LCOR_01346.1	-0.527695	0.693662	15.0592	21.7097	FALSE	1	hypothetical protein RO3G_12486	201	9	5.43933e-58	67.0%	1	F:protein binding	0	IPR002110; IPR020683; PTHR24188 (PANTHER)
LCOR_01347.1	-1.47254	0.360347	29.0827	80.7075	TRUE	0.00375222	alpha- -mannosyltransferase	383	20	0	74.25%	3	F:mannosyltransferase activity; P:protein glycosylation; C:membrane	0	IPR002685; G3DSA:3.90.550.10 (GENE3D), PTHR31121 (PANTHER), SignalP-NN(euk) (SIGNALP), tmhmm (TMHMM), SSF53448 (SUPERFAMILY)
LCOR_01348.1	1.30771	2.47547	89.8633	36.3014	TRUE	0.000615165	---NA---	135	0			0	0		no IPS match
LCOR_01349.1	0.860137	1.81521	56.9496	31.3735	TRUE	0.00929103	---NA---	160	0			0	0		no IPS match
LCOR_01350.1	-0.0308933	0.978814	25.7314	26.2884	FALSE	0.520499	---NA---	98	0			1	F:zinc ion binding	0	IPR007087; PTHR11389 (PANTHER), SSF57667 (SUPERFAMILY)
LCOR_01351.1	-0.921108	0.528103	8.22384	15.5724	FALSE	0.380399	ribonucleotide reductase small subunit	386	20	0	85.05%	4	P:deoxyribonucleoside diphosphate metabolic process; P:oxidation-reduction process; F:oxidoreductase activity; F:transition metal ion binding	0	IPR000358; IPR009078; IPR012348; PTHR23409:SF6 (PANTHER), tmhmm (TMHMM)
LCOR_01352.1	-1.33104	0.397481	12.9488	32.5772	FALSE	0.0427241	protein sym1	195	20	1.26739e-58	67.2%	1	C:integral to membrane	0	IPR007248; PTHR11266:SF4 (PANTHER), SignalP-NN(euk) (SIGNALP), tmhmm (TMHMM)
LCOR_01353.1	-1.14072	0.453533	3.64243	8.03125	FALSE	0.218256	methyltransferase type 11	479	7	8.39432e-107	56.14%	4	F:methyltransferase activity; F:transferase activity; P:metabolic process; P:methylation		G3DSA:3.40.50.150 (GENE3D), PTHR10108 (PANTHER), PF13489 (PFAM), SSF53335 (SUPERFAMILY)
LCOR_01354.1	-1.59915	0.330071	8.15963	24.7208	TRUE	0.000833169	gpi transamidase component gaa1	615	20	0	51.5%	1	C:GPI-anchor transamidase complex	0	IPR007246; G3DSA:3.40.630.10 (GENE3D), SignalP-NN(euk) (SIGNALP), tmhmm (TMHMM)
LCOR_01355.1	-0.83074	0.562241	136.385	242.574	FALSE	0.44663	---NA---	82	0			0	0		IPR021719
LCOR_01356.1	0.336722	1.26288	61.6911	48.8494	FALSE	0.0162117	---NA---	304	0			1	F:protein binding	0	IPR003892; IPR009060; G3DSA:1.10.8.10 (GENE3D)
LCOR_01357.1	-0.493122	0.710486	0.616065	0.867103	FALSE	1	nad-dependent malic enzyme 2	572	20	0	65.5%	5	P:malate metabolic process; F:malate dehydrogenase (oxaloacetate-decarboxylating) activity; P:oxidation-reduction process; F:NAD binding; F:metal ion binding	EC:1.1.1.38	IPR001891; IPR012301; IPR012302; IPR015884; IPR016040; PTHR23406 (PANTHER), PTHR23406:SF5 (PANTHER), SSF51735 (SUPERFAMILY), SSF53223 (SUPERFAMILY)
LCOR_01358.1	-1.05848	0.480137	6.33273	13.1894	FALSE	0.321309	pho85p cyclin of the pho80p pcl7p	276	20	3.83765e-79	66.85%	2	P:regulation of cyclin-dependent protein kinase activity; F:protein kinase binding	0	IPR012389; IPR013922; PTHR15615 (PANTHER), PTHR15615:SF0 (PANTHER)
LCOR_01359.1	-1.06937	0.476528	7.43313	15.5985	FALSE	0.224464	voltage-dependent potassium channel subunit beta	338	20	4.13676e-160	70.35%	8	P:oxidation-reduction process; F:voltage-gated potassium channel activity; F:oxidoreductase activity; C:cytoplasm; C:integral to membrane; P:transmembrane transport; P:potassium ion transport; F:ion channel activity		IPR001395; IPR005399; IPR023210; SignalP-NN(euk) (SIGNALP)
LCOR_01360.1	-0.718842	0.607585	23.2499	38.2662	FALSE	0.698654	related to ascospore maturation 1 protein	239	20	1.2128e-51	82.2%	2	F:DNA binding; F:sequence-specific DNA binding transcription factor activity	0	IPR003163
LCOR_01361.1	-0.989455	0.503668	6.15273	12.2159	FALSE	0.346608	---NA---	294	0			0	0		IPR013907
LCOR_01362.1	-0.929449	0.525059	22.47	42.7952	FALSE	0.303918	hypothetical protein RO3G_04952	266	1	3.23055e-73	68.0%	4	F:RNA binding; C:nucleus; C:cytoplasm; P:mRNA processing	0	IPR002999; IPR010304; G3DSA:2.30.30.140 (GENE3D), PTHR12664 (PANTHER), SSF63748 (SUPERFAMILY)
LCOR_01363.1	-0.0237242	0.98369	5.05042	5.13415	FALSE	0.184346	---NA---	699	0			0	0		no IPS match
LCOR_01364.1	Inf	Inf	0.194098	0	FALSE	0.205818	hypothetical protein RO3G_04941	230	2	5.67601e-42	62.5%	1	C:membrane	0	IPR000791; PTHR31123 (PANTHER), PTHR31123:SF0 (PANTHER), tmhmm (TMHMM)
LCOR_01365.1	-0.961012	0.513696	28.0097	54.5259	FALSE	0.223492	rna-binding domain-containing protein	297	20	2.92148e-101	66.65%	2	F:nucleotide binding; F:snRNA binding	0	IPR000504; IPR012677; IPR024888; PF13893 (PFAM), SSF54928 (SUPERFAMILY)
LCOR_01366.1	-2.17709	0.221121	0.210797	0.953309	FALSE	0.24677	---NA---	159	0			0	0		no IPS match
LCOR_01367.1	1.26837	2.40889	36.926	15.3291	TRUE	5.92115e-09	glycoside hydrolase family 15 protein	674	20	0	66.7%	2	F:catalytic activity; P:polysaccharide metabolic process	0	IPR008928; IPR011613; IPR012341; PTHR31616 (PANTHER), PTHR31616:SF0 (PANTHER)
LCOR_01368.1	0.198536	1.14753	27.7413	24.1747	FALSE	0.0155542	hypothetical protein RO3G_14696	446	1	1.38999e-48	60.0%	0	0		no IPS match
LCOR_01369.1	-0.378865	0.769042	0.844165	1.09768	FALSE	1	---NA---	79	0			0	0		SignalP-NN(euk) (SIGNALP)
LCOR_01370.1	-0.0370091	0.974673	1513.31	1552.63	FALSE	0.151254	---NA---	128	0			0	0		IPR009009; IPR014733; SignalP-NN(euk) (SIGNALP), tmhmm (TMHMM)
LCOR_01371.1	0.965694	1.953	0.96034	0.491725	FALSE	0.376809	---NA---	74	0			0	0		no IPS match
LCOR_01372.1	-0.731054	0.602463	1.51081	2.50772	FALSE	0.896297	glutamate synthase	154	20	4.43832e-44	92.55%	3	P:glutamate biosynthetic process; F:glutamate synthase activity; P:oxidation-reduction process	0	IPR002932; IPR013785; PTHR11938 (PANTHER), PTHR11938:SF1 (PANTHER), SSF51395 (SUPERFAMILY)
LCOR_01373.1	-1.20166	0.434776	1.71129	3.93602	FALSE	0.66636	---NA---	71	0			0	0		SignalP-NN(euk) (SIGNALP), tmhmm (TMHMM)
LCOR_01374.1	-0.658425	0.633569	2.02366	3.19407	FALSE	0.929428	---NA---	274	0			0	0		SignalP-NN(euk) (SIGNALP)
LCOR_01375.1	0.0862364	1.0616	3.54455	3.33888	FALSE	0.36819	---NA---	135	0			0	0		no IPS match
LCOR_01376.1	-1.7363	0.300138	94.4492	314.686	TRUE	0.000366697	cell pattern formation-associated protein	189	20	5.42383e-35	67.5%	2	F:DNA binding; F:sequence-specific DNA binding transcription factor activity	0	IPR003163
LCOR_01377.1	-0.563973	0.676437	0.724632	1.07125	FALSE	1	---NA---	214	0			0	0		no IPS match
LCOR_01378.1	-0.0394882	0.973	4.16867	4.28435	FALSE	0.345604	---NA---	403	0			1	F:protein binding	0	IPR001452; G3DSA:2.30.30.40 (GENE3D), PTHR10661 (PANTHER), PTHR10661:SF68 (PANTHER), tmhmm (TMHMM)
LCOR_01379.1	-0.248557	0.841738	12.2278	14.5269	FALSE	0.4439	snare associated golgi protein	406	20	6.31232e-66	59.65%	0	0		IPR015414; PTHR12677 (PANTHER), tmhmm (TMHMM)
LCOR_01380.1	-1.89488	0.268896	7.69582	28.62	TRUE	0.000224079	flavin containing polyamine	547	20	0	60.1%	2	F:oxidoreductase activity; P:oxidation-reduction process	0	IPR002937; G3DSA:3.50.50.60 (GENE3D), PTHR10742 (PANTHER), PTHR10742:SF30 (PANTHER), SSF51905 (SUPERFAMILY), SSF54373 (SUPERFAMILY)
LCOR_01381.1	1.12439	2.18009	30.7259	14.0939	TRUE	0.00395477	---NA---	67	0			0	0		no IPS match
LCOR_01383.1	-0.227854	0.853904	1.35653	1.58862	FALSE	0.971537	---NA---	81	0			0	0		no IPS match
LCOR_01384.1	-0.753734	0.593067	11.8748	20.0228	FALSE	0.747277	multidrug resistance protein 1	1323	20	0	65.45%	4	F:ATP binding; C:integral to membrane; P:transmembrane transport; F:ATPase activity	EC:3.6.1.3	IPR001140; IPR003439; IPR003593; IPR011527; IPR017871; IPR017940; IPR027417; G3DSA:1.20.1560.10 (GENE3D), G3DSA:3.40.50.300 (GENE3D), PTHR24221 (PANTHER), tmhmm (TMHMM)
LCOR_01385.1	-1.15504	0.449054	8.98943	20.0186	FALSE	0.156283	---NA---	190	0			0	0		no IPS match
LCOR_01386.1	-Inf	0	0	0.0112813	FALSE	0.698654	transcription factor hsf1	1667	20	0	69.3%	3	F:sequence-specific DNA binding transcription factor activity; C:nucleus; F:sequence-specific DNA binding	0	IPR000232; IPR011991; IPR019412; PTHR10015 (PANTHER), SSF46785 (SUPERFAMILY), SSF48452 (SUPERFAMILY)
LCOR_01387.1	-0.687022	0.621135	3.8121	6.13731	FALSE	0.837392	nuclear export protein noc3	790	20	0	58.05%	4	F:ATP binding; F:protein kinase activity; P:protein phosphorylation; F:protein serine/threonine kinase activity		IPR005612; IPR011501; IPR016903; PTHR14428 (PANTHER), PTHR14428:SF5 (PANTHER)
LCOR_01388.1	-1.44408	0.367526	6.62123	18.0157	TRUE	0.00983662	cdp-diacylglycerol--glycerol-3-phosphate 3- mitochondrial	491	20	0	59.65%	2	F:catalytic activity; P:phospholipid biosynthetic process	0	IPR001736; IPR016270; IPR025202; G3DSA:3.30.870.10 (GENE3D), SignalP-NN(euk) (SIGNALP), SSF56024 (SUPERFAMILY)
LCOR_01389.1	-0.753727	0.593069	1.51866	2.56068	FALSE	0.703203	related to cdc24-gtp gdp exchange factor for cdc42p	870	20	1.67171e-95	53.25%	4	F:Rho guanyl-nucleotide exchange factor activity; C:intracellular; P:regulation of Rho protein signal transduction; F:protein binding	0	IPR000219; IPR000270; IPR001331; IPR001715; IPR010481; IPR011993; G3DSA:3.10.20.240 (GENE3D), PTHR22826 (PANTHER), PTHR22826:SF51 (PANTHER), SignalP-NN(euk) (SIGNALP), tmhmm (TMHMM), SSF50729 (SUPERFAMILY), SSF54277 (SUPERFAMILY)
LCOR_01390.1	-0.264287	0.83261	23.0894	27.7314	FALSE	0.408132	major sperm protein	552	8	7.71504e-119	53.0%	0	0		IPR001251; IPR011074; PTHR10174 (PANTHER)
LCOR_01391.1	0.514675	1.42867	2.26448	1.58502	FALSE	0.0322547	hypothetical protein RO3G_05793	507	1	7.1981e-45	46.0%	3	F:guanyl-nucleotide exchange factor activity; C:intracellular; P:small GTPase mediated signal transduction	0	IPR002219; IPR008937; IPR010482; G3DSA:3.30.60.20 (GENE3D), PTHR23113:SF18 (PANTHER), tmhmm (TMHMM), SSF57889 (SUPERFAMILY)
LCOR_01392.1	0.619847	1.53671	0.507493	0.330246	FALSE	0.172962	---NA---	587	0			0	0		no IPS match
LCOR_01393.1	-0.747205	0.595757	10.512	17.6449	FALSE	0.6467	gpi mannosyltransferase 1-like	843	20	6.20814e-149	59.4%	5	P:carbohydrate metabolic process; C:endoplasmic reticulum membrane; P:GPI anchor biosynthetic process; C:integral to membrane; F:catalytic activity	0	IPR000490; IPR007704; IPR013781; IPR017853; PTHR12886:SF0 (PANTHER), SignalP-NN(euk) (SIGNALP), tmhmm (TMHMM)
LCOR_01394.1	-1.33558	0.396232	72.1846	182.178	FALSE	0.0248478	acyl carrier protein	111	20	1.40902e-34	80.75%	1	P:fatty acid biosynthetic process	0	IPR003231; IPR006162; IPR009081; PTHR20863 (PANTHER), PTHR20863:SF5 (PANTHER), SignalP-NN(euk) (SIGNALP)
LCOR_01395.1	-1.36786	0.387464	14.2093	36.6726	FALSE	0.0218013	dna-binding protein hgh1	360	20	2.80307e-118	58.8%	1	F:binding	0	IPR007205; IPR007206; IPR011989; IPR016024; PTHR32199 (PANTHER)
LCOR_01397.1	0.197757	1.14691	57.4148	50.0603	FALSE	0.0171895	vacuolar-sorting protein snf8	251	20	1.01756e-93	68.2%	15	C:transcription factor complex; P:regulation of transcription from RNA polymerase II promoter; F:transcription factor binding; P:protein transport; C:membrane; P:cellular membrane organization; C:nucleus; C:endosome; C:cytoplasm; P:endosomal transport; C:late endosome membrane; C:cytosol; F:molecular_function; C:cellular_component; P:biological_process		IPR007286; IPR011991; PTHR12806:SF0 (PANTHER), SSF46785 (SUPERFAMILY)
LCOR_01398.1	-1.0218	0.492502	21.4143	43.4807	FALSE	0.166641	eukaryotic translation initiation factor 3 subunit 8	797	20	0	69.0%	4	F:translation initiation factor activity; C:eukaryotic translation initiation factor 3 complex; P:translational initiation; F:translation initiation factor binding	0	IPR000717; IPR008905; IPR011991; PTHR13937 (PANTHER), SSF46785 (SUPERFAMILY)
LCOR_01399.1	-0.104714	0.929989	15.1255	16.2641	FALSE	0.184324	cyclic nucleotide-binding domain protein	787	20	5.15571e-121	54.9%	0	0		IPR000595; IPR006553; IPR014710; IPR018488; IPR018490; G3DSA:3.80.10.10 (GENE3D), PTHR23125 (PANTHER), PTHR23125:SF49 (PANTHER), PF13516 (PFAM), SignalP-NN(euk) (SIGNALP), SSF52047 (SUPERFAMILY)
LCOR_01400.1	-0.877848	0.544178	31.8328	58.497	FALSE	0.376852	s15 ns1 rna-binding domain-containing protein	238	18	1.1069e-93	61.89%	3	F:structural constituent of ribosome; C:ribosome; P:translation	0	IPR000589; IPR005290; IPR009068; PD157043 (PRODOM), PTHR23321 (PANTHER), PTHR23321:SF11 (PANTHER)
LCOR_01401.1	-1.30987	0.403358	8.0935	20.0653	FALSE	0.041901	inorganic pyrophosphatase exopolyphosphatase	371	20	1.05663e-94	50.1%	3	F:manganese ion binding; C:cytoplasm; F:pyrophosphatase activity	0	IPR001667; IPR004097; G3DSA:3.90.1640.10 (GENE3D), PTHR21466 (PANTHER), SSF64182 (SUPERFAMILY)
LCOR_01402.1	-1.41532	0.374926	39.6606	105.783	FALSE	0.0244233	---NA---	121	0			3	F:structural constituent of ribosome; C:ribosome; P:translational elongation	0	IPR001813; PTHR21141 (PANTHER)
LCOR_01403.1	-0.147641	0.902725	38.3528	42.4856	FALSE	0.228625	---NA---	197	0			1	F:nucleic acid binding	0	IPR002775; G3DSA:3.30.110.20 (GENE3D), SSF82704 (SUPERFAMILY)
LCOR_01404.1	-0.811099	0.569947	346.252	607.515	FALSE	0.549896	enolase	418	20	0	85.8%	4	C:phosphopyruvate hydratase complex; F:magnesium ion binding; F:phosphopyruvate hydratase activity; P:glycolysis	EC:4.2.1.11	IPR000941; IPR020809; IPR020810; IPR020811; G3DSA:3.20.20.120 (GENE3D), G3DSA:3.30.390.10 (GENE3D), SSF51604 (SUPERFAMILY), SSF54826 (SUPERFAMILY)
LCOR_01405.1	-0.97576	0.508472	21.515	42.313	FALSE	0.230698	nucleoporin nup44	475	20	4.48327e-83	55.5%	1	C:nuclear pore	0	IPR024864; IPR025712; PTHR13000:SF0 (PANTHER)
LCOR_01407.1	0.289423	1.22215	108.351	88.6563	TRUE	0.00838885	protein phosphatase pp1 regulatory subunit	334	20	9.98068e-134	73.2%	1	F:protein binding	0	IPR001611; IPR003591; IPR003603; IPR025875; G3DSA:3.80.10.10 (GENE3D), PTHR10588 (PANTHER), PTHR10588:SF96 (PANTHER), PF13504 (PFAM), PF13855 (PFAM), SM00365 (SMART), SSF52058 (SUPERFAMILY)
LCOR_01409.1	-1.16132	0.447103	2.72413	6.09283	FALSE	0.129847	hypothetical protein RO3G_04554	914	2	0	63.5%	3	F:sequence-specific DNA binding RNA polymerase II transcription factor activity; C:nucleus; F:zinc ion binding	0	IPR001138; PTHR31069 (PANTHER), PTHR31069:SF0 (PANTHER)
LCOR_01410.1	-0.771748	0.585707	0.461155	0.787348	FALSE	0.989644	---NA---	272	0			0	0		IPR006671
LCOR_01411.1	-0.487439	0.71329	44.6676	62.6219	FALSE	0.912392	atp -binding protein fet5	302	20	4.77941e-128	71.6%	1	F:nucleotide binding	0	IPR004130; IPR027417; G3DSA:3.40.50.300 (GENE3D), PTHR21231 (PANTHER), PTHR21231:SF4 (PANTHER)
LCOR_01412.1	-1.26097	0.417263	12.8387	30.7687	FALSE	0.0379083	alanine racemase	418	20	2.52332e-146	52.9%	5	C:cytoplasm; C:cytosol; F:lyase activity; F:D-serine ammonia-lyase activity; C:nucleus		IPR001608; IPR026956; G3DSA:3.20.20.10 (GENE3D), SSF51419 (SUPERFAMILY)
LCOR_01413.1	-1.55453	0.340438	21.2773	62.4997	TRUE	0.00930531	prefoldin subunit 6	126	20	7.54663e-51	76.6%	3	P:protein folding; C:prefoldin complex; F:unfolded protein binding	0	IPR002777; IPR009053; G3DSA:1.10.287.370 (GENE3D), PTHR21431 (PANTHER), PTHR21431:SF0 (PANTHER)
LCOR_01414.1	-0.997489	0.500871	3.60817	7.20379	FALSE	0.447562	---NA---	205	0			0	0		no IPS match
LCOR_01415.1	-0.765296	0.588333	154.174	262.052	FALSE	0.646526	60s ribosomal protein l2	281	20	6.9231e-157	87.9%	3	F:structural constituent of ribosome; C:ribosome; P:translation	0	IPR002171; IPR008991; IPR012340; IPR014722; IPR014726; IPR022666; IPR022669; IPR022671; PTHR13691:SF4 (PANTHER)
LCOR_01416.1	0.476132	1.39101	496.883	357.21	TRUE	0.00280717	---NA---	71	0			0	0		SignalP-NN(euk) (SIGNALP)
LCOR_01417.1	-0.720278	0.606981	18.4707	30.4305	FALSE	0.763349	---NA---	175	0			0	0		IPR009071; PTHR13711 (PANTHER), PTHR13711:SF39 (PANTHER)
LCOR_01418.1	-0.792079	0.577511	10.6333	18.4122	FALSE	0.590678	mitochondrial carrier	499	20	3.49534e-108	48.95%	3	C:integral to membrane; C:membrane; P:transport		IPR018108; IPR023395; PTHR24089 (PANTHER), PTHR24089:SF92 (PANTHER)
LCOR_01420.1	2.225	4.67511	0.462682	0.0989671	TRUE	0.00145727	transcriptional regulator medusa	654	20	1.60423e-64	76.45%	0	0		no IPS match
LCOR_01421.1	0.454821	1.37061	27.3984	19.9899	TRUE	0.00720635	---NA---	356	0			0	0		no IPS match
LCOR_01422.1	0.812023	1.75567	17.601	10.0252	TRUE	1.4658e-05	---NA---	631	0			0	0		IPR001370; PTHR10044 (PANTHER), PTHR10044:SF15 (PANTHER), SSF57924 (SUPERFAMILY)
LCOR_01423.1	-0.611894	0.654337	63.6599	97.2892	FALSE	0.975188	glutathione-disulfide reductase	467	20	0	74.45%	7	C:cytoplasm; P:cell redox homeostasis; F:flavin adenine dinucleotide binding; P:oxidation-reduction process; F:glutathione-disulfide reductase activity; P:glutathione metabolic process; F:NADP binding	EC:1.8.1.7	IPR004099; IPR006322; IPR012999; IPR013027; IPR016156; IPR023753; PR00411 (PRINTS), G3DSA:3.50.50.60 (GENE3D), PTHR22912 (PANTHER), PTHR22912:SF27 (PANTHER), SSF51905 (SUPERFAMILY)
LCOR_01424.1	-1.20051	0.435122	7.46862	17.1644	FALSE	0.250816	---NA---	127	0			2	F:ribonuclease activity; P:tRNA processing	0	IPR002759; PTHR15441 (PANTHER), PTHR15441:SF0 (PANTHER)
LCOR_01425.1	0.0592099	1.0419	0.0225995	0.0216908	FALSE	1	---NA---	396	0			2	F:protein binding; F:phospholipid binding	0	IPR001849; IPR011993; PTHR31941 (PANTHER), SSF50729 (SUPERFAMILY)
LCOR_01427.1	-0.923719	0.527149	480.425	911.366	FALSE	0.396403	cytochrome c oxidase subunit vib	84	20	1.22904e-38	83.2%	2	F:cytochrome-c oxidase activity; C:mitochondrion	EC:1.9.3.1	IPR003213; PD015172 (PRODOM), PTHR11387 (PANTHER)
LCOR_01428.1	1.38115	2.60477	5.68033	2.18074	TRUE	5.8241e-05	phosphatidylinositol 4-kinase	1984	20	0	54.45%	3	P:phosphatidylinositol phosphorylation; P:phosphatidylinositol-mediated signaling; F:binding	0	IPR000403; IPR001263; IPR011009; IPR015433; IPR016024; IPR018936; G3DSA:3.30.1010.10 (GENE3D), PTHR10048:SF15 (PANTHER)
LCOR_01429.1	0.919529	1.8915	188.773	99.8006	TRUE	0.00016348	endoplasmic oxidoreductin-1	520	20	0	65.05%	4	F:protein disulfide isomerase activity; C:endoplasmic reticulum membrane; F:flavin adenine dinucleotide binding; P:oxidation-reduction process	EC:5.3.4.1	IPR007266; PTHR12613:SF0 (PANTHER), SignalP-NN(euk) (SIGNALP), tmhmm (TMHMM)
LCOR_01430.1	-1.417	0.374489	4.33684	11.5807	FALSE	0.0101507	related to neurofibromin	2823	20	0	59.0%	4	F:GTPase activator activity; C:intracellular; P:regulation of small GTPase mediated signal transduction; F:binding	0	IPR001251; IPR001936; IPR008936; IPR016024; IPR023152; PTHR10194 (PANTHER), PTHR10194:SF7 (PANTHER), PF13716 (PFAM), tmhmm (TMHMM)
LCOR_01431.1	-0.619454	0.650917	3.6009	5.53204	FALSE	0.989406	---NA---	99	0			0	0		SignalP-NN(euk) (SIGNALP)
LCOR_01432.1	-1.17643	0.442446	5.02817	11.3645	FALSE	0.225805	---NA---	165	0			0	0		no IPS match
LCOR_01433.1	-2.21683	0.215114	5.98934	27.8427	TRUE	1.08571e-06	lipoamide acyltransferase component of branched-chain alpha-keto acid dehydrogenase mitochondrial	493	20	3.8195e-175	61.05%	3	F:dihydrolipoyllysine-residue (2-methylpropanoyl)transferase activity; P:fatty-acyl-CoA biosynthetic process; F:cofactor binding	EC:2.3.1.168	IPR000089; IPR001078; IPR003016; IPR004167; IPR011053; IPR015761; IPR023213; G3DSA:2.40.50.100 (GENE3D), PTHR23151 (PANTHER), SSF52777 (SUPERFAMILY)
LCOR_01434.1	-0.579013	0.669422	5.08534	7.59661	FALSE	1	---NA---	431	0			0	0		no IPS match
LCOR_01435.1	-0.940173	0.521171	8.85971	16.9996	FALSE	0.489669	---NA---	167	0			0	0		IPR007146; IPR011082
LCOR_01436.1	-1.63253	0.322523	105.582	327.362	TRUE	0.00170075	redoxin domain-containing protein	169	20	5.07496e-79	68.5%	1	F:oxidoreductase activity	0	IPR012336; IPR013740; PTHR10430 (PANTHER), PTHR10430:SF4 (PANTHER)
LCOR_01437.1	0.812566	1.75633	2.52187	1.43587	FALSE	0.0983596	---NA---	98	0			0	0		no IPS match
LCOR_01438.1	1.73468	3.32805	258.881	77.7875	TRUE	2.34951e-13	---NA---	106	0			0	0		no IPS match
LCOR_01440.1	0.738625	1.66859	18.9497	11.3567	TRUE	9.12955e-05	opi1-domain-containing protein	436	4	2.17093e-64	56.0%	0	0		IPR013927
LCOR_01441.1	-1.05681	0.480695	28.5551	59.4037	FALSE	0.125514	---NA---	339	0			0	0		IPR019181; PTHR13542 (PANTHER)
LCOR_01442.1	-0.113742	0.924188	15.8761	17.1784	FALSE	0.275695	hypothetical protein RO3G_14815	290	1	3.61235e-74	74.0%	1	F:nucleic acid binding	0	IPR000467; PTHR23149 (PANTHER), PTHR23149:SF2 (PANTHER)
LCOR_01443.1	1.36288	2.57198	543.057	211.144	TRUE	2.07232e-07	hypothetical protein RO3G_06274	312	1	1.16315e-43	47.0%	0	0		tmhmm (TMHMM)
LCOR_01444.1	-0.900322	0.535767	18.2139	33.996	FALSE	0.301781	cell cycle regulatory protein	621	20	9.61646e-159	62.4%	1	F:protein binding	0	IPR001680; IPR015943; IPR017986; IPR019775; PTHR19918 (PANTHER), PTHR19918:SF0 (PANTHER)
LCOR_01445.1	-1.5486	0.341841	13.1583	38.4925	TRUE	0.00259471	atp-dependent bile acid permease	1590	20	0	60.45%	4	F:ATP binding; C:integral to membrane; P:transmembrane transport; F:ATPase activity	EC:3.6.1.3	IPR001140; IPR003439; IPR003593; IPR011527; IPR017871; IPR017940; IPR027417; G3DSA:1.20.1560.10 (GENE3D), G3DSA:3.40.50.300 (GENE3D), PTHR24223 (PANTHER), SignalP-NN(euk) (SIGNALP), tmhmm (TMHMM)
LCOR_01446.1	1.45234	2.73651	25.1353	9.18515	TRUE	2.64615e-07	methyltransferase type 11	355	10	5.17935e-92	53.8%	4	F:methyltransferase activity; F:transferase activity; P:metabolic process; P:methylation		G3DSA:3.40.50.150 (GENE3D), PTHR10108 (PANTHER), PF13489 (PFAM), SSF53335 (SUPERFAMILY)
LCOR_01447.1	-1.77671	0.291848	0.0553239	0.189564	FALSE	0.534888	hypothetical protein RO3G_15617	407	7	9.95501e-132	64.86%	4	F:ATP binding; P:protein phosphorylation; F:protein serine/threonine kinase activity; F:protein tyrosine kinase activity	EC:2.7.11.0; EC:2.7.10.0	IPR000719; IPR002290; IPR008271; IPR011009; IPR017441; IPR020635; G3DSA:1.10.510.10 (GENE3D), G3DSA:3.30.200.20 (GENE3D), PTHR24361 (PANTHER)
LCOR_01448.1	-1.37562	0.385386	64.0501	166.197	FALSE	0.0249391	imp dehydrogenase	523	20	0	81.9%	4	F:protein binding; P:oxidation-reduction process; F:IMP dehydrogenase activity; P:purine nucleotide biosynthetic process	EC:1.1.1.205	IPR000644; IPR001093; IPR005990; IPR013785; IPR015875; PTHR11911 (PANTHER), SSF51412 (SUPERFAMILY), SSF54631 (SUPERFAMILY)
LCOR_01449.1	-0.477831	0.718056	2.33982	3.25854	FALSE	1	---NA---	297	0			0	0		no IPS match
LCOR_01450.1	0.185639	1.13732	11.2261	9.87064	FALSE	0.117503	---NA---	213	0			0	0		SignalP-NN(euk) (SIGNALP), tmhmm (TMHMM)
LCOR_01451.1	-0.789288	0.57863	8.10354	14.0047	FALSE	0.508061	gtpase-activating protein gyp5	1030	20	0	62.5%	3	F:Rab GTPase activator activity; C:intracellular; P:regulation of Rab GTPase activity	0	IPR000195; G3DSA:1.10.8.270 (GENE3D), PTHR22957 (PANTHER), PTHR22957:SF62 (PANTHER)
LCOR_01452.1	0.538202	1.45216	87.2494	60.0824	TRUE	0.0018453	vea protein	250	20	4.35454e-40	52.8%	4	P:autophagy; C:late endosome; P:protein transport; P:transport		IPR021740
LCOR_01453.1	1.02831	2.03963	352.684	172.916	TRUE	9.99392e-07	threonyl-trna synthetase	749	20	0	80.2%	4	F:ATP binding; C:cytoplasm; F:threonine-tRNA ligase activity; P:threonyl-tRNA aminoacylation	EC:6.1.1.3	IPR002314; IPR002320; IPR004095; IPR004154; IPR006195; IPR012675; IPR012676; IPR012947; IPR018163; G3DSA:3.30.54.20 (GENE3D), G3DSA:3.30.930.10 (GENE3D), G3DSA:3.30.980.10 (GENE3D), PTHR11451 (PANTHER), PTHR11451:SF5 (PANTHER), SSF55681 (SUPERFAMILY)
LCOR_01454.1	0.293763	1.22583	464.692	379.082	FALSE	0.0117553	---NA---	685	0			1	F:protein dimerization activity	0	IPR011598; PTHR12565 (PANTHER), PTHR12565:SF3 (PANTHER), tmhmm (TMHMM)
LCOR_01455.1	0.900877	1.8672	5.65167	3.02681	TRUE	0.00855726	---NA---	158	0			0	0		no IPS match
LCOR_01456.1	-1.80601	0.28598	16.9159	59.1504	TRUE	0.000419359	---NA---	150	0			1	F:protein dimerization activity	0	IPR011598
LCOR_01457.1	-0.213826	0.862247	12.5894	14.6006	FALSE	0.358776	egcse_cyano ame: full=endoglycoceramidase short=egcase ame: full=glycosphingolipid-specific enzyme short=gsl-specific enzyme flags: precursor	502	20	0	77.2%	2	P:carbohydrate metabolic process; F:catalytic activity	0	IPR001547; IPR013781; IPR017853; PTHR31308 (PANTHER), PTHR31308:SF0 (PANTHER), SignalP-NN(euk) (SIGNALP)
LCOR_01458.1	-1.36363	0.388604	0.584835	1.50496	FALSE	0.777041	---NA---	96	0			0	0		no IPS match
LCOR_01459.1	0.229163	1.17215	14.7821	12.611	FALSE	0.0508701	hypothetical protein RO3G_15710	319	18	1.23956e-36	52.67%	2	F:nucleic acid binding; F:zinc ion binding	0	IPR001878
LCOR_01460.1	-1.08536	0.471276	2.65117	5.62552	FALSE	0.50423	---NA---	89	0			0	0		no IPS match
LCOR_01461.1	Inf	Inf	0.121588	0	FALSE	1	---NA---	73	0			0	0		no IPS match
LCOR_01462.1	-1.46124	0.363181	12.8293	35.3248	FALSE	0.0249391	---NA---	179	0			0	0		no IPS match
LCOR_01463.1	-2.15328	0.2248	2.39129	10.6374	TRUE	0.00253506	---NA---	135	0			0	0		no IPS match
LCOR_01464.1	-0.0525898	0.964204	0.349264	0.36223	FALSE	0.76194	---NA---	276	0			0	0		no IPS match
LCOR_01466.1	-0.222738	0.856938	37.1778	43.3845	FALSE	0.737528	---NA---	153	0			0	0		no IPS match
LCOR_01467.1	-0.83953	0.558826	5.65801	10.1248	FALSE	0.519127	---NA---	620	0			0	0		no IPS match
LCOR_01468.1	-0.999636	0.500126	1.73079	3.46071	FALSE	0.358471	hypothetical protein RO3G_04054	1035	2	1.96756e-110	60.5%	3	F:G-protein coupled receptor activity; P:G-protein coupled receptor signaling pathway; C:integral to membrane	0	IPR000337; IPR001828; IPR017978; G3DSA:3.40.50.2300 (GENE3D), PTHR24060 (PANTHER), PTHR24060:SF4 (PANTHER), tmhmm (TMHMM), SSF53822 (SUPERFAMILY)
LCOR_01469.1	-1.7605	0.295147	34.3337	116.327	TRUE	0.000156436	---NA---	185	0			0	0		IPR024368
LCOR_01470.1	-0.192013	0.875383	274.131	313.155	FALSE	0.352278	---NA---	152	0			0	0		IPR024368
LCOR_01471.1	-0.548656	0.683657	2.81871	4.12299	FALSE	1	short-chain dehydrogenase reductase sdr	299	20	6.76326e-34	52.9%	2	P:metabolic process; F:oxidoreductase activity	0	IPR002198; IPR002347; IPR016040; PTHR24316 (PANTHER), SSF51735 (SUPERFAMILY)
LCOR_01472.1	-0.649986	0.637286	2.09109	3.28125	FALSE	0.975188	---NA---	122	0			0	0		no IPS match
LCOR_01473.1	0.645342	1.56411	174.175	111.357	TRUE	0.000373411	phospho-2-dehydro-3-deoxyheptonate aldolase	353	20	0	79.25%	2	F:3-deoxy-7-phosphoheptulonate synthase activity; P:aromatic amino acid family biosynthetic process	EC:2.5.1.54	IPR006218; IPR006219; IPR013785; SSF51569 (SUPERFAMILY)
LCOR_01474.1	-1.37148	0.386495	1.72544	4.46433	FALSE	0.154308	mitochondrial carrier protein	322	2	7.96427e-130	64.0%	0	0		IPR018108; IPR023395; PTHR24089 (PANTHER)
LCOR_01475.1	1.99886	3.99683	23.2153	5.80844	TRUE	1.29275e-12	pdz domain-containing protein	884	20	0	57.1%	3	F:protein binding; P:proteolysis; F:serine-type peptidase activity	0	IPR001478; IPR008256; IPR009003; IPR025926; G3DSA:2.30.42.10 (GENE3D), G3DSA:2.40.10.10 (GENE3D), PTHR22939 (PANTHER), PTHR22939:SF15 (PANTHER), PF13365 (PFAM)
LCOR_01476.1	1.09312	2.13334	133.463	62.5606	TRUE	8.67339e-07	---NA---	196	0			0	0		no IPS match
LCOR_01477.1	1.12275	2.17762	593.291	272.45	TRUE	4.52067e-07	---NA---	186	0			3	F:protein phosphatase inhibitor activity; P:regulation of signal transduction; P:regulation of phosphoprotein phosphatase activity	0	IPR007062; PTHR12398 (PANTHER), PTHR12398:SF4 (PANTHER)
LCOR_01478.1	-2.75847	0.14778	0.347195	2.3494	TRUE	0.0099955	hypothetical protein RO3G_17178	245	3	4.98523e-38	88.33%	2	F:zinc ion binding; F:nucleic acid binding	0	IPR007087; IPR013087; IPR015880; PTHR14596 (PANTHER), PTHR14596:SF6 (PANTHER), PF13465 (PFAM), SSF57667 (SUPERFAMILY)
LCOR_01479.1	-0.304853	0.809525	3.94447	4.87258	FALSE	0.627606	ribosomal rna large subunit methyltransferase n	372	20	1.33976e-123	67.0%	4	C:cytoplasm; P:rRNA processing; F:RNA methyltransferase activity; F:iron-sulfur cluster binding	0	IPR004383; IPR007197; IPR013785; PTHR30544:SF0 (PANTHER), PF13394 (PFAM), SSF102114 (SUPERFAMILY)
LCOR_01480.1	-1.13095	0.456616	11.6544	25.5234	FALSE	0.134284	---NA---	389	0			0	0		IPR007846; PTHR21527 (PANTHER), SignalP-NN(euk) (SIGNALP), SSF54928 (SUPERFAMILY)
LCOR_01481.1	-0.0415545	0.971608	0.133	0.136886	FALSE	0.824704	carotene oxygenase	573	20	2.8255e-116	45.25%	5	F:oxidoreductase activity, acting on single donors with incorporation of molecular oxygen, incorporation of two atoms of oxygen; P:oxidation-reduction process; F:oxidoreductase activity; F:monooxygenase activity; F:beta-carotene 15,15'-monooxygenase activity		IPR004294; PTHR10543:SF6 (PANTHER)
LCOR_01482.1	-1.26003	0.417535	4.93839	11.8275	FALSE	0.0760477	nuclear protein	614	20	1.92674e-149	49.95%	3	F:nucleic acid binding; F:zinc ion binding; F:catalytic activity	0	IPR001878; IPR006767; IPR006768; IPR011146; PTHR12072 (PANTHER)
LCOR_01483.1	0.128603	1.09323	1.16031	1.06136	FALSE	0.259401	transforming growth factor beta regulator 1	757	20	1.43424e-110	63.1%	1	C:nucleus	0	IPR003888; IPR003889; PTHR22715 (PANTHER), PTHR22715:SF0 (PANTHER)
LCOR_01484.1	-0.424491	0.745102	29.4217	39.4869	FALSE	0.804432	alpha beta-hydrolase	330	20	5.46369e-44	49.3%	0	0		G3DSA:3.40.50.1820 (GENE3D), PTHR10992 (PANTHER), PTHR10992:SF223 (PANTHER), PF12697 (PFAM), SSF53474 (SUPERFAMILY)
LCOR_01485.1	-0.902058	0.535123	22.0293	41.1669	FALSE	0.34374	cytochrome c heme lyase	252	20	5.27398e-65	61.0%	2	F:holocytochrome-c synthase activity; C:mitochondrion	EC:4.4.1.17	IPR000511; PTHR12743:SF0 (PANTHER)
LCOR_01486.1	0.070575	1.05014	327.26	311.636	FALSE	0.0788667	fatty acid desaturase	391	20	0	61.55%	3	P:fatty acid biosynthetic process; C:integral to membrane; P:oxidation-reduction process	0	IPR005804; IPR013866; PTHR12879 (PANTHER), tmhmm (TMHMM)
LCOR_01487.1	0.580059	1.49491	99.2094	66.3648	FALSE	0.02315	---NA---	140	0			0	0		SignalP-NN(euk) (SIGNALP), tmhmm (TMHMM)
LCOR_01488.1	-0.849511	0.554973	7.04128	12.6876	FALSE	0.641427	---NA---	142	0			0	0		SignalP-NN(euk) (SIGNALP), tmhmm (TMHMM)
LCOR_01489.1	0.584394	1.49941	145.46	97.0115	TRUE	0.000306216	---NA---	142	0			0	0		SignalP-NN(euk) (SIGNALP)
LCOR_01490.1	-1.01367	0.495283	32.4163	65.4501	FALSE	0.1753	ubiquitin-conjugating enzyme e2-24	226	20	8.06588e-87	87.3%	1	F:acid-amino acid ligase activity	EC:6.3.2.0	IPR000608; IPR016135; IPR023313; PTHR24068 (PANTHER), SM00212 (SMART)
LCOR_01491.1	-0.542965	0.686359	21.3932	31.1692	FALSE	1	tbc-domain-containing protein	1186	20	0	60.55%	4	F:Rab GTPase activator activity; C:intracellular; P:regulation of Rab GTPase activity; F:calcium ion binding	0	IPR000195; IPR002048; IPR004182; IPR011992; IPR018247; G3DSA:1.10.8.270 (GENE3D), PTHR22957 (PANTHER), PTHR22957:SF48 (PANTHER), SSF47473 (SUPERFAMILY)
LCOR_01492.1	-1.04443	0.484838	2.42647	5.0047	FALSE	0.152951	separase separin	2098	20	1.01876e-101	50.95%	4	C:nucleus; P:proteolysis; F:peptidase activity; F:protein binding	0	IPR005314; IPR011990; IPR019734; SSF48452 (SUPERFAMILY)
LCOR_01493.1	-0.520155	0.697297	39.591	56.7778	FALSE	0.975673	---NA---	170	0			0	0		SignalP-NN(euk) (SIGNALP)
LCOR_01495.1	0.717337	1.64414	58.0709	35.3198	TRUE	4.76255e-05	conserved oligomeric golgi complex subunit 6	688	20	1.38458e-132	58.05%	2	P:intra-Golgi vesicle-mediated transport; C:Golgi transport complex	0	IPR010490
LCOR_01496.1	-0.891583	0.539022	23.5452	43.6812	FALSE	0.310193	sulfate transporter	487	20	1.8009e-163	62.75%	3	P:sulfate transport; F:sulfate transmembrane transporter activity; C:integral to membrane	0	IPR011547; PTHR31970 (PANTHER), PTHR31970:SF0 (PANTHER), tmhmm (TMHMM)
LCOR_01497.1	-1.06245	0.478818	5.87724	12.2745	FALSE	0.211151	hypothetical protein RO3G_00371	441	4	6.51476e-128	52.75%	0	0		IPR003590; G3DSA:3.80.10.10 (GENE3D), PTHR24106 (PANTHER), PF13516 (PFAM), SSF52047 (SUPERFAMILY)
LCOR_01498.1	-0.243372	0.844768	6.26939	7.42144	FALSE	0.48114	related to mrna export factor mex67	623	20	2.23117e-146	49.8%	13	P:mRNA transport; P:transport; C:nucleus; C:intracellular; C:spindle; P:poly(A)+ mRNA export from nucleus; C:cytoplasm; C:nuclear RNA export factor complex; C:nuclear membrane; F:protein heterodimerization activity; C:nucleolus; F:protein binding; C:cytosol		IPR018222; G3DSA:3.10.450.50 (GENE3D), G3DSA:3.80.10.10 (GENE3D), PTHR10662 (PANTHER), PTHR10662:SF22 (PANTHER), SSF52058 (SUPERFAMILY), SSF54427 (SUPERFAMILY)
LCOR_01499.1	-1.15981	0.447572	3.86411	8.63349	FALSE	0.217796	---NA---	520	0			0	0		no IPS match
LCOR_01500.1	-1.27382	0.413563	178.012	430.436	FALSE	0.0392213	---NA---	311	0			1	F:protein binding	0	IPR001202; G3DSA:2.20.70.10 (GENE3D), PTHR11254 (PANTHER), PTHR11254:SF65 (PANTHER)
LCOR_01501.1	-1.47388	0.360014	4.84519	13.4583	TRUE	0.00844582	class v myosin	1528	20	0	67.4%	4	F:motor activity; F:ATP binding; C:myosin complex; F:actin filament binding	0	IPR000048; IPR001609; IPR002710; IPR008989; IPR018444; IPR027417; PTHR13140 (PANTHER), PTHR13140:SF32 (PANTHER)
LCOR_01502.1	-2.01945	0.246652	3.68927	14.9574	TRUE	4.06707e-05	chromosome segregation protein	1197	20	0	67.45%	7	F:protein binding; F:ATP binding; C:chromosome; P:DNA repair; P:DNA recombination; P:sister chromatid cohesion; P:chromosome condensation	0	IPR003395; IPR009053; IPR010935; IPR024704; IPR027417; G3DSA:3.40.50.300 (GENE3D), PTHR18937 (PANTHER), PTHR18937:SF8 (PANTHER)
LCOR_01503.1	1.724	3.30352	9.59985	2.90594	TRUE	0.000420261	---NA---	142	0			0	0		no IPS match
LCOR_01504.1	0.141748	1.10324	9.86349	8.94046	FALSE	0.059708	hypothetical protein RO3G_12633	514	2	6.04959e-31	49.0%	2	F:GTP binding; P:cell cycle	0	IPR000038; IPR027417; G3DSA:3.40.50.300 (GENE3D), PTHR18884:SF4 (PANTHER), tmhmm (TMHMM)
LCOR_01505.1	-1.30158	0.40568	57.2462	141.112	FALSE	0.0282855	---NA---	120	0			0	0		SignalP-NN(euk) (SIGNALP)
LCOR_01506.1	-1.3222	0.399924	116.595	291.543	FALSE	0.0164717	small nuclear ribonucleoprotein f	86	20	1.03441e-44	84.1%	2	C:nucleus; P:RNA processing	0	IPR001163; IPR006649; IPR010920; IPR016487; G3DSA:2.30.30.100 (GENE3D), PTHR11021 (PANTHER), PTHR11021:SF0 (PANTHER)
LCOR_01507.1	0.103119	1.07409	0.315845	0.294057	FALSE	0.596404	zrt2p	411	20	3.94728e-43	48.6%	4	C:membrane; P:metal ion transport; F:metal ion transmembrane transporter activity; P:transmembrane transport	0	IPR003689; PTHR11040 (PANTHER), PTHR11040:SF1 (PANTHER), tmhmm (TMHMM)
LCOR_01508.1	0.411836	1.33038	0.776991	0.584038	FALSE	0.432735	hypothetical protein RO3G_15560	312	2	2.92406e-59	69.5%	1	C:endoplasmic reticulum	0	IPR003388; PTHR10994:SF12 (PANTHER), tmhmm (TMHMM)
LCOR_01509.1	-1.00089	0.499692	32.8984	65.8374	FALSE	0.176783	-like 1	456	20	0	90.45%	3	F:ATP binding; C:Ino80 complex; F:ATP-dependent 5'-3' DNA helicase activity	0	IPR003593; IPR010339; IPR012340; IPR027238; IPR027417; G3DSA:1.10.8.60 (GENE3D), G3DSA:3.40.50.300 (GENE3D), PTHR11093:SF3 (PANTHER)
LCOR_01510.1	-2.49317	0.177615	1.17328	6.60574	TRUE	2.87907e-05	rna-dependent rna polymerase 1	1038	20	8.10767e-144	57.35%	1	F:RNA-directed RNA polymerase activity	EC:2.7.7.48	IPR007855; PTHR23079:SF0 (PANTHER)
LCOR_01511.1	-1.6975	0.30832	2.04231	6.624	FALSE	0.0977499	---NA---	165	0			0	0		no IPS match
LCOR_01512.1	-3.48463	0.0893349	0.795784	8.90788	TRUE	5.01387e-13	rna-directed rna polymerase	1099	20	2.80325e-147	53.5%	1	F:RNA-directed RNA polymerase activity	EC:2.7.7.48	IPR007855
LCOR_01513.1	0.059688	1.04224	31.4431	30.1687	FALSE	0.048071	---NA---	536	0			0	0		tmhmm (TMHMM)
LCOR_01514.1	1.08458	2.12076	630.031	297.078	TRUE	9.83565e-07	fad binding domain-containing protein	569	20	0	49.8%	2	P:metabolic process; F:oxidoreductase activity	0	IPR002938; IPR003042; IPR012336; G3DSA:3.30.9.10 (GENE3D), G3DSA:3.40.30.20 (GENE3D), G3DSA:3.50.50.60 (GENE3D), PTHR13789 (PANTHER), PTHR13789:SF87 (PANTHER), SignalP-NN(euk) (SIGNALP), SSF51905 (SUPERFAMILY), SSF54373 (SUPERFAMILY)
LCOR_01515.1	-0.14658	0.90339	25.3816	28.096	FALSE	0.212598	pre-mrna splicing factor	772	20	0	65.3%	3	F:nucleic acid binding; F:ATP binding; F:ATP-dependent helicase activity	0	IPR001650; IPR002464; IPR007502; IPR011545; IPR014001; IPR027417; G3DSA:3.40.50.300 (GENE3D), PTHR18934 (PANTHER)
LCOR_01516.1	-0.840495	0.558452	8.71222	15.6007	FALSE	0.460339	yike_schpo ame: full=probable 6-phosphofructo-2-kinase	555	20	0	66.95%	3	F:ATP binding; F:6-phosphofructo-2-kinase activity; P:fructose metabolic process	EC:2.7.1.105	IPR001345; IPR003094; IPR013078; IPR013079; IPR016260; IPR027417; G3DSA:3.40.50.1240 (GENE3D), G3DSA:3.40.50.300 (GENE3D), PTHR10606:SF6 (PANTHER), SSF53254 (SUPERFAMILY)
LCOR_01517.1	-2.8752	0.136295	0.219636	1.61148	FALSE	0.0388022	xylose transporter	541	20	0	60.75%	3	F:substrate-specific transmembrane transporter activity; P:transmembrane transport; C:integral to membrane	0	IPR003663; IPR005828; IPR005829; IPR016196; IPR020846; G3DSA:1.20.1250.20 (GENE3D), PTHR24063 (PANTHER), PTHR24063:SF103 (PANTHER), SignalP-NN(euk) (SIGNALP), tmhmm (TMHMM)
LCOR_01518.1	0.210143	1.1568	40.4899	35.0015	FALSE	0.0145769	carbon-nitrogen hydrolase	257	20	8.19675e-77	57.3%	1	P:nitrogen compound metabolic process	0	IPR003010; PTHR11750 (PANTHER), PTHR11750:SF25 (PANTHER)
LCOR_01520.1	-0.900696	0.535628	47.4168	88.5256	FALSE	0.375797	eukaryotic translation initiation factor 3 subunit a	1015	20	0	70.8%	2	F:protein binding; C:eukaryotic translation initiation factor 3 complex	0	IPR000717; IPR027512; PTHR14005 (PANTHER), SSF46785 (SUPERFAMILY)
LCOR_01521.1	-1.33088	0.397527	13.1834	33.1636	FALSE	0.113413	ubiquitin-like protein	98	20	3.65662e-42	81.8%	1	F:protein binding	0	IPR000626; IPR019955; IPR022617; G3DSA:3.10.20.90 (GENE3D), PTHR10562 (PANTHER), SSF54236 (SUPERFAMILY)
LCOR_01522.1	-3.49274	0.0888342	1.44924	16.314	TRUE	2.74246e-10	cytochrome p450	532	20	4.82592e-80	47.75%	3	F:electron carrier activity; F:heme binding; P:oxidation-reduction process	0	IPR001128; IPR002401; IPR017972; PTHR24279 (PANTHER), tmhmm (TMHMM)
LCOR_01523.1	Inf	Inf	0.0164953	0	FALSE	1	cytochrome p450	544	20	3.15135e-85	47.0%	3	F:electron carrier activity; F:heme binding; P:oxidation-reduction process	0	IPR001128; IPR002401; IPR017972; PTHR24281 (PANTHER), SignalP-NN(euk) (SIGNALP), tmhmm (TMHMM)
LCOR_01524.1	-2.2035	0.21711	0.116131	0.534895	FALSE	0.129233	cytochrome p450	522	20	1.25304e-91	49.85%	3	F:electron carrier activity; F:heme binding; P:oxidation-reduction process	0	IPR001128; IPR002401; IPR017972; PTHR24303 (PANTHER), SignalP-NN(euk) (SIGNALP), tmhmm (TMHMM)
LCOR_01526.1	2.85769	7.24856	0.649559	0.0896121	TRUE	0.000742282	cytochrome p450	481	20	1.24013e-73	48.6%	3	F:electron carrier activity; F:heme binding; P:oxidation-reduction process	0	IPR001128; IPR002401; IPR017972; PTHR24281 (PANTHER), SignalP-NN(euk) (SIGNALP), tmhmm (TMHMM)
LCOR_01527.1	-0.183003	0.880868	43.2074	49.0509	FALSE	0.242816	---NA---	282	0			2	F:sequence-specific DNA binding transcription factor activity; F:sequence-specific DNA binding	0	IPR004827; G3DSA:1.20.5.170 (GENE3D), PTHR13044 (PANTHER), PTHR13044:SF7 (PANTHER)
LCOR_01528.1	-0.23615	0.849008	8.50237	10.0145	FALSE	0.379827	phd finger and bah domain-containing protein	1073	20	0	46.45%	5	F:sequence-specific DNA binding transcription factor activity; F:zinc ion binding; F:sequence-specific DNA binding; F:chromatin binding; F:protein binding	0	IPR000679; IPR001005; IPR001025; IPR001965; IPR009057; IPR011011; IPR013083; IPR013088; IPR017884; IPR019786; IPR019787; PTHR13793 (PANTHER), PTHR13793:SF31 (PANTHER), PF13831 (PFAM), PF13832 (PFAM), SSF57716 (SUPERFAMILY)
LCOR_01529.1	-1.00433	0.498502	5.76775	11.5702	FALSE	0.223637	fumarylacetoacetate hydrolase family protein	681	20	8.56055e-82	60.35%	4	F:protein binding; F:zinc ion binding; F:catalytic activity; P:metabolic process	0	IPR001841; IPR002529; IPR006845; IPR011234; IPR013083; IPR017907; PTHR11820 (PANTHER), PTHR11820:SF6 (PANTHER), PF13923 (PFAM), SSF57850 (SUPERFAMILY)
LCOR_01530.1	-1.03104	0.489358	7.71632	15.7682	FALSE	0.228533	related to peroxisome assembly protein 12	392	20	3.86852e-172	57.4%	4	F:zinc ion binding; C:integral to peroxisomal membrane; P:protein targeting to peroxisome; F:protein C-terminus binding	0	IPR001841; IPR006845; IPR013083; IPR017375; PTHR12888:SF0 (PANTHER), PF13923 (PFAM), SSF57850 (SUPERFAMILY)
LCOR_01531.1	0.149555	1.10923	20.5061	18.4868	FALSE	0.0323774	tubulin-tyrosine ligase	418	20	2.39948e-165	59.15%	3	F:tubulin-tyrosine ligase activity; P:cellular protein modification process; F:ATP binding	EC:6.3.2.25	IPR004344; IPR013816; PTHR12241 (PANTHER), PTHR12241:SF7 (PANTHER), SSF56059 (SUPERFAMILY)
LCOR_01532.1	1.91376	3.7679	111.005	29.4608	TRUE	2.71271e-12	arrestin domain-containing protein	479	20	3.72238e-97	53.75%	4	C:integral to membrane; C:membrane; C:cytosol; P:cellular response to stress		IPR011021; IPR011022; IPR014756; PTHR11188 (PANTHER), PTHR11188:SF1 (PANTHER)
LCOR_01533.1	-2.01004	0.248266	7.66485	30.8735	TRUE	3.01333e-05	hypothetical protein RO3G_06816	356	1	2.98601e-100	62.0%	2	P:metabolic process; F:hydrolase activity	0	IPR006357; IPR023214; PTHR19288 (PANTHER), PTHR19288:SF3 (PANTHER), PF13242 (PFAM)
LCOR_01534.1	-0.718639	0.60767	9.45473	15.559	FALSE	0.742371	---NA---	284	0			0	0		tmhmm (TMHMM)
LCOR_01535.1	-0.170202	0.888718	36.2027	40.7359	FALSE	0.270352	---NA---	291	0			0	0		IPR001623; IPR018253; PTHR24077 (PANTHER), PTHR24077:SF15 (PANTHER)
LCOR_01536.1	-0.240969	0.846177	0.0798104	0.0943188	FALSE	1	15-hydroxyprostaglandin dehydrogenase	283	1	2.46687e-26	49.0%	2	P:metabolic process; F:oxidoreductase activity	0	IPR002198; IPR002347; IPR016040; IPR020904; PTHR24316 (PANTHER), SSF51735 (SUPERFAMILY)
LCOR_01537.1	-1.83531	0.280232	11.6892	41.7127	TRUE	0.00015742	---NA---	1160	0			2	F:nucleic acid binding; F:zinc ion binding	0	IPR000571; IPR002625; IPR013899; PTHR13308 (PANTHER), SSF90229 (SUPERFAMILY)
LCOR_01538.1	-0.641359	0.641109	7.50783	11.7107	FALSE	0.853602	ccch zinc finger and smr domain protein	685	20	9.99841e-158	51.55%	3	F:nucleic acid binding; F:zinc ion binding; F:protein binding	0	IPR000571; IPR002625; IPR003892; IPR013899; PTHR13308 (PANTHER), SSF90229 (SUPERFAMILY)
LCOR_01539.1	0.0102761	1.00715	26.8352	26.6448	FALSE	0.29505	hypothetical protein RO3G_04997	141	1	7.61321e-27	61.0%	0	0		IPR009009; IPR014733; SignalP-NN(euk) (SIGNALP), tmhmm (TMHMM)
LCOR_01541.1	-0.713709	0.609751	11.4614	18.7969	FALSE	0.73382	hypothetical pas domain protein	515	20	1.11401e-102	78.6%	3	F:sequence-specific DNA binding RNA polymerase II transcription factor activity; C:nucleus; F:zinc ion binding	0	IPR001138; PTHR31986 (PANTHER)
LCOR_01543.1	-0.590911	0.663923	653.089	983.682	FALSE	1	guanine nucleotide binding protein beta subunit	316	20	0	87.4%	1	F:protein binding	0	IPR001680; IPR015943; IPR017986; IPR019775; IPR020472; PTHR19868 (PANTHER), PTHR19868:SF0 (PANTHER)
LCOR_01544.1	0.551468	1.46558	48.731	33.2504	TRUE	0.000670622	---NA---	274	0			1	F:zinc ion binding	0	IPR011016; IPR013083; PTHR23012 (PANTHER), PTHR23012:SF7 (PANTHER), tmhmm (TMHMM), SSF57850 (SUPERFAMILY)
LCOR_01545.1	-Inf	0	0	0.0580289	FALSE	1	---NA---	173	0			0	0		no IPS match
LCOR_01546.1	-1.00159	0.49945	45.9338	91.9687	FALSE	0.195314	eukaryotic translation initiation factor 3 subunit	329	20	0	80.15%	1	F:protein binding	0	IPR001680; IPR015943; IPR017986; IPR019775; PTHR19877 (PANTHER)
LCOR_01547.1	-0.858068	0.551691	14.1729	25.69	FALSE	0.443796	hypothetical pas domain protein	438	20	6.94371e-120	69.25%	3	F:sequence-specific DNA binding RNA polymerase II transcription factor activity; C:nucleus; F:zinc ion binding	0	IPR001138; PTHR31986 (PANTHER)
LCOR_01548.1	-1.29936	0.406306	56.3251	138.627	FALSE	0.0233301	adenine phosphoribosyltransferase	178	20	2.62767e-98	77.15%	4	P:nucleoside metabolic process; F:adenine phosphoribosyltransferase activity; C:cytoplasm; P:adenine salvage	EC:2.4.2.7	IPR000836; IPR005764; G3DSA:3.40.50.2020 (GENE3D), PTHR32214 (PANTHER), SSF53271 (SUPERFAMILY)
LCOR_01549.1	-1.31789	0.401122	8.11358	20.2272	FALSE	0.0344727	tor signaling pathway regulator	353	20	7.86499e-115	54.75%	1	P:regulation of signal transduction	0	IPR007304; PTHR10933:SF9 (PANTHER)
LCOR_01550.1	-2.143	0.226409	4.20509	18.573	TRUE	0.000147744	hypothetical protein RO3G_02319	516	2	1.63769e-48	50.5%	0	0		SignalP-NN(euk) (SIGNALP), tmhmm (TMHMM)
LCOR_01551.1	-2.42371	0.186376	0.0575393	0.308727	FALSE	0.283409	---NA---	311	0			0	0		SignalP-NN(euk) (SIGNALP), tmhmm (TMHMM)
LCOR_01552.1	0.475548	1.39045	36.1901	26.0277	TRUE	0.00176324	upstream serine threonine kinase for the snf1 complex	659	20	5.90105e-153	58.6%	4	F:ATP binding; P:protein phosphorylation; F:protein serine/threonine kinase activity; F:protein tyrosine kinase activity	EC:2.7.11.0; EC:2.7.10.0	IPR000719; IPR002290; IPR008271; IPR011009; IPR017441; IPR020635; IPR020636; G3DSA:1.10.510.10 (GENE3D), G3DSA:3.30.200.20 (GENE3D), PTHR24347:SF1 (PANTHER)
LCOR_01553.1	-0.842526	0.557666	0.0399052	0.0715575	FALSE	1	---NA---	281	0			0	0		SignalP-NN(euk) (SIGNALP)
LCOR_01554.1	-1.36714	0.387659	11.9253	30.7624	FALSE	0.0865827	regulator of g protein signaling	660	20	3.82905e-61	51.05%	2	P:termination of G-protein coupled receptor signaling pathway; P:intracellular signal transduction	0	IPR000342; IPR000591; IPR011991; IPR016137; IPR024066; G3DSA:1.10.167.10 (GENE3D), PTHR10845 (PANTHER), PTHR10845:SF44 (PANTHER), SSF46785 (SUPERFAMILY)
LCOR_01555.1	-0.863011	0.549804	10.5302	19.1527	FALSE	0.551967	phosphoglycerate kinase	416	20	0	84.85%	2	F:phosphoglycerate kinase activity; P:glycolysis	EC:2.7.2.3	IPR001576; IPR015824; IPR015901; IPR015911
LCOR_01556.1	-1.14572	0.451965	25.8122	57.1111	FALSE	0.0825677	hypothetical protein CAPTEDRAFT_166480	247	1	4.67488e-28	73.0%	2	C:intracellular; F:zinc ion binding	0	IPR001876; PTHR12999 (PANTHER), SSF90209 (SUPERFAMILY)
LCOR_01557.1	Inf	Inf	0.0574177	0	FALSE	1	---NA---	195	0			0	0		no IPS match
LCOR_01558.1	0.729775	1.65838	8.0622	4.86149	FALSE	0.0595783	---NA---	73	0			0	0		tmhmm (TMHMM)
LCOR_01559.1	-0.495902	0.709118	47.8601	67.4924	FALSE	0.949474	adp-ribosylation factor gtpase-activating protein 1-like	397	20	7.50585e-71	61.05%	3	F:ARF GTPase activator activity; F:zinc ion binding; P:regulation of ARF GTPase activity	0	IPR001164; PTHR23180 (PANTHER), PTHR23180:SF35 (PANTHER), SSF57863 (SUPERFAMILY)
LCOR_01560.1	-0.126314	0.916169	17.98	19.6252	FALSE	0.343139	hypothetical protein RO3G_09591	688	1	8.47181e-95	56.0%	0	0		tmhmm (TMHMM)
LCOR_01561.1	-0.528083	0.693476	25.7435	37.1224	FALSE	0.966263	hypothetical protein RO3G_02186	419	1	1.68309e-37	43.0%	0	0		G3DSA:3.80.10.10 (GENE3D), PTHR23125 (PANTHER), PF12937 (PFAM)
LCOR_01562.1	-0.88007	0.543341	5.90438	10.8668	FALSE	0.607048	long-chain-fatty-acid-- ligase	550	20	2.11801e-42	43.75%	2	F:catalytic activity; P:metabolic process	0	IPR000873; G3DSA:2.30.38.10 (GENE3D), G3DSA:3.30.300.30 (GENE3D), G3DSA:3.40.50.980 (GENE3D), PTHR24096 (PANTHER), PTHR24096:SF16 (PANTHER), SSF56801 (SUPERFAMILY)
LCOR_01563.1	-0.978383	0.507548	0.0940015	0.185207	FALSE	0.940167	fatty-acid-- ligase	526	20	2.01309e-37	42.2%	2	F:catalytic activity; P:metabolic process	0	IPR000873; IPR025110; G3DSA:2.30.38.10 (GENE3D), G3DSA:3.30.300.30 (GENE3D), G3DSA:3.40.50.980 (GENE3D), PTHR24096 (PANTHER), SSF56801 (SUPERFAMILY)
LCOR_01564.1	-1.45317	0.365218	1.53144	4.19323	FALSE	0.374005	---NA---	96	0			0	0		no IPS match
LCOR_01565.1	-1.52431	0.347646	28.4344	81.7912	FALSE	0.0218855	amp-binding enzyme	549	20	5.34068e-42	43.3%	2	F:catalytic activity; P:metabolic process	0	IPR000873; IPR025110; G3DSA:2.30.38.10 (GENE3D), G3DSA:3.30.300.30 (GENE3D), G3DSA:3.40.50.980 (GENE3D), PTHR24096 (PANTHER), SSF56801 (SUPERFAMILY)
LCOR_01566.1	-1.15228	0.449912	34.004	75.5791	FALSE	0.0699253	ribosome biogenesis arb family abcf2-like	600	20	0	79.45%	2	F:ATP binding; F:ATPase activity	EC:3.6.1.3	IPR003439; IPR003593; IPR017871; IPR027417; G3DSA:3.40.50.300 (GENE3D), PTHR19211 (PANTHER), PTHR19211:SF15 (PANTHER), PF12848 (PFAM)
LCOR_01567.1	-Inf	0	0	0.0539103	FALSE	0.698654	hypothetical protein RO3G_12795	534	3	8.81038e-131	59.33%	3	F:electron carrier activity; F:protein disulfide oxidoreductase activity; P:cell redox homeostasis	0	IPR002109; IPR006993; IPR012336; PTHR12232:SF0 (PANTHER)
LCOR_01568.1	-1.01432	0.49506	12.3902	25.0277	FALSE	0.195534	dual specificity phosphatase catalytic domain-containing protein	344	7	2.1204e-63	54.71%	4	F:phosphatase activity; P:dephosphorylation; P:protein dephosphorylation; F:protein tyrosine/serine/threonine phosphatase activity		G3DSA:3.40.50.1820 (GENE3D), PTHR10992 (PANTHER), PF12697 (PFAM), SignalP-NN(euk) (SIGNALP), tmhmm (TMHMM), SSF53474 (SUPERFAMILY)
LCOR_01569.1	-0.237645	0.848129	84.5453	99.6845	FALSE	0.546153	regulator of chromosome condensation	441	20	3.48194e-119	54.3%	26	P:cell division; P:regulation of mitotic cell cycle; P:mitosis; F:hydrolase activity; P:mRNA export from nucleus; C:nucleus; F:DNA binding; P:mitotic cell cycle checkpoint; P:spindle assembly involved in mitosis; F:ATP binding; P:small GTPase mediated signal transduction; C:mitochondrial matrix; P:Ran protein signal transduction; F:serine-type peptidase activity; P:cell cycle; P:regulation of mit…		IPR000408; IPR009091; PTHR22870 (PANTHER), PTHR22870:SF17 (PANTHER)
LCOR_01570.1	0.961284	1.94704	106	54.4416	TRUE	5.16786e-07	structure-specific endonuclease subunit slx1	270	20	6.16231e-46	49.0%	11	P:DNA recombination; C:nucleus; F:hydrolase activity; P:response to DNA damage stimulus; P:DNA repair; C:intracellular; F:metal ion binding; F:endonuclease activity; F:nuclease activity; F:DNA binding; F:zinc ion binding		IPR000305; IPR013083; IPR027299; PTHR20208 (PANTHER), PTHR20208:SF10 (PANTHER), PF11793 (PFAM)
LCOR_01571.1	0.634277	1.55216	106.404	68.5522	TRUE	0.000286432	mitogen-activated protein kinase hog1	371	20	0	91.85%	4	F:ATP binding; P:protein phosphorylation; F:MAP kinase activity; F:protein tyrosine kinase activity	EC:2.7.11.24; EC:2.7.10.0	IPR000719; IPR002290; IPR003527; IPR008271; IPR008352; IPR011009; IPR017441; IPR020635; G3DSA:1.10.510.10 (GENE3D), G3DSA:3.30.200.20 (GENE3D), PTHR24055 (PANTHER), PTHR24055:SF30 (PANTHER)
LCOR_01572.1	-1.46691	0.361757	9.09393	25.1383	TRUE	0.00833103	t-complex protein delta subunit (tcp-1-delta)	530	20	0	89.5%	3	F:ATP binding; P:protein folding; F:unfolded protein binding	0	IPR002194; IPR002423; IPR012717; IPR017998; IPR027409; IPR027410; IPR027413; SSF54849 (SUPERFAMILY)
LCOR_01573.1	-1.71912	0.303734	24.2981	79.9979	TRUE	0.000758795	t-complex protein 1 subunit epsilon	550	20	0	90.3%	3	F:ATP binding; P:protein folding; F:unfolded protein binding	0	IPR002194; IPR002423; IPR012718; IPR017998; IPR027409; IPR027410; IPR027413; SSF54849 (SUPERFAMILY)
LCOR_01574.1	-Inf	0	0	0.132635	FALSE	1	---NA---	70	0			0	0		no IPS match
LCOR_01575.1	0.227782	1.17103	0.0618248	0.052795	FALSE	1	hypothetical protein RO3G_06280	325	1	5.02472e-29	88.0%	2	F:zinc ion binding; F:nucleic acid binding	0	IPR007087; IPR013087; IPR015880; PTHR24377 (PANTHER), PTHR24377:SF0 (PANTHER), PF13465 (PFAM), SSF57667 (SUPERFAMILY)
LCOR_01576.1	-1.30125	0.405774	36.8289	90.7621	FALSE	0.0320181	sm-like ribonucleo protein	102	20	8.11959e-38	95.4%	2	F:nucleic acid binding; C:ribonucleoprotein complex		IPR001163; IPR006649; IPR010920; IPR027141; G3DSA:2.30.30.100 (GENE3D), PTHR23338:SF18 (PANTHER)
LCOR_01577.1	-1.28099	0.411514	112.714	273.9	FALSE	0.0286927	hypothetical protein RO3G_08742	268	2	3.81909e-45	61.0%	1	P:ATP hydrolysis coupled proton transport	0	IPR008388; IPR024722; PTHR12471:SF0 (PANTHER), SignalP-NN(euk) (SIGNALP), tmhmm (TMHMM)
LCOR_01578.1	-1.66748	0.314802	82.0339	260.589	TRUE	0.00452276	gdp-mannose -dehydratase	374	20	0	87.3%	4	F:catalytic activity; F:coenzyme binding; C:intracellular; P:GDP-mannose metabolic process	0	IPR001509; IPR006368; IPR016040; G3DSA:3.90.25.10 (GENE3D), PTHR10366 (PANTHER), PTHR10366:SF32 (PANTHER), SSF51735 (SUPERFAMILY)
LCOR_01579.1	-0.510747	0.701859	2.04151	2.90872	FALSE	0.964817	hypothetical protein RO3G_15594	686	1	1.09354e-32	67.0%	3	F:sequence-specific DNA binding RNA polymerase II transcription factor activity; C:nucleus; F:zinc ion binding	0	IPR001138; PTHR31986 (PANTHER)
LCOR_01580.1	1.12234	2.177	404.987	186.03	TRUE	4.15038e-06	---NA---	422	0			0	0		IPR025337
LCOR_01581.1	1.48818	2.80535	1.37998	0.491909	FALSE	0.0442535	---NA---	134	0			0	0		no IPS match
LCOR_01582.1	-0.139217	0.908012	26.7682	29.48	FALSE	0.229424	hypothetical protein RO3G_00766	1188	1	1.46314e-30	49.0%	1	F:protein binding	0	IPR003169; PTHR14445 (PANTHER), PTHR14445:SF3 (PANTHER)
LCOR_01583.1	-0.941439	0.520713	3.20279	6.15077	FALSE	0.359413	hypothetical protein RO3G_11323	885	1	1.86641e-167	59.0%	0	0		IPR019337; PTHR15830 (PANTHER)
LCOR_01585.1	0.778868	1.71578	21.5476	12.5585	TRUE	0.00712852	---NA---	83	0			0	0		no IPS match
LCOR_01587.1	1.21022	2.31373	814.014	351.82	TRUE	8.41116e-08	---NA---	122	0			0	0		no IPS match
LCOR_01588.1	1.99219	3.97841	8.75848	2.2015	TRUE	1.62354e-11	hypothetical protein RO3G_12516	888	4	5.57859e-58	51.0%	1	P:cell cycle arrest	0	IPR003108
LCOR_01589.1	-0.868778	0.547611	8.11854	14.8254	FALSE	0.443028	hypothetical protein RO3G_01262	457	2	4.84032e-120	71.0%	1	F:protein binding	0	IPR004274; IPR023214
LCOR_01590.1	-1.65843	0.316784	6.16207	19.4519	FALSE	0.0188771	non-structural maintenance of chromosome element 4	326	20	5.763e-61	55.45%	3	C:nucleus; P:DNA repair; C:Smc5-Smc6 complex	0	IPR014854; PTHR16140:SF0 (PANTHER)
LCOR_01591.1	-0.0990003	0.93368	9.06769	9.71178	FALSE	0.210765	casein kinase i isoform delta	529	20	0	83.95%	4	F:ATP binding; P:protein phosphorylation; F:protein serine/threonine kinase activity; F:protein tyrosine kinase activity	EC:2.7.11.0; EC:2.7.10.0	IPR000719; IPR002290; IPR008271; IPR011009; IPR020635; G3DSA:1.10.510.10 (GENE3D), G3DSA:3.30.200.20 (GENE3D), PTHR11909 (PANTHER), PTHR11909:SF18 (PANTHER)
LCOR_01592.1	-0.548742	0.683616	18.4635	27.0087	FALSE	1	ribosome biogenesis protein sqt1	410	20	0	65.3%	1	F:protein binding	0	IPR001680; IPR015943; IPR017986; IPR019775; IPR020472; PTHR19857 (PANTHER)
LCOR_01593.1	0.849907	1.80238	335.189	185.97	TRUE	9.95463e-06	methyltransferase type 11	407	20	2.1624e-55	51.2%	4	F:methyltransferase activity; F:transferase activity; P:metabolic process; P:methylation		G3DSA:3.40.50.150 (GENE3D), PTHR10108 (PANTHER), PTHR10108:SF52 (PANTHER), PF13489 (PFAM), tmhmm (TMHMM), SSF53335 (SUPERFAMILY)
LCOR_01594.1	-0.123215	0.91814	570.616	621.492	FALSE	0.280878	hypothetical protein RO3G_05663	328	2	1.93288e-30	66.0%	4	F:protein binding; C:extracellular region; P:carbohydrate metabolic process; F:carbohydrate binding	0	IPR000008; IPR003610; IPR008973; IPR018029; G3DSA:2.60.40.150 (GENE3D), PTHR10774 (PANTHER)
LCOR_01595.1	0.150269	1.10978	83.3296	75.0868	FALSE	0.0528642	aconitate hydratase	808	20	0	70.9%	2	F:aconitate hydratase activity; P:tricarboxylic acid cycle	EC:4.2.1.3	IPR000573; IPR001030; IPR006248; IPR015928; IPR015931; IPR015932; IPR015937
LCOR_01596.1	0.182415	1.13478	89.9717	79.2854	FALSE	0.0342244	actin-interacting protein (bud6 aip3)	920	20	2.27254e-106	58.2%	0	0		IPR005613; IPR022782; PTHR22741 (PANTHER), PTHR22741:SF2 (PANTHER)
LCOR_01597.1	0.0511749	1.03611	45.497	43.9114	FALSE	0.0719794	related to glycerol-3-phosphate-acyltransferase-laccaria bicolor	1527	20	0	58.35%	7	F:nucleic acid binding; F:zinc ion binding; P:lipid metabolic process; F:electron carrier activity; F:protein disulfide oxidoreductase activity; P:cell redox homeostasis; F:hydrolase activity	0	IPR000571; IPR001087; IPR002109; IPR002123; IPR011767; IPR011899; IPR012336; IPR013831; IPR014025; G3DSA:3.40.1130.10 (GENE3D), PTHR23102 (PANTHER), PTHR23102:SF13 (PANTHER), tmhmm (TMHMM), SSF52266 (SUPERFAMILY), SSF69593 (SUPERFAMILY), SSF90229 (SUPERFAMILY)
LCOR_01598.1	0.187862	1.13907	24.7139	21.6965	FALSE	0.108438	---NA---	133	0			2	F:nucleic acid binding; F:zinc ion binding	0	IPR001878; PTHR23002 (PANTHER), PTHR23002:SF11 (PANTHER)
LCOR_01600.1	-1.19475	0.436862	0.169671	0.388385	FALSE	1	---NA---	118	0			1	F:protein binding	0	IPR001810; G3DSA:1.20.1280.50 (GENE3D), PF12937 (PFAM)
LCOR_01602.1	-0.463542	0.725203	4.1486	5.7206	FALSE	0.981509	---NA---	198	0			0	0		no IPS match
LCOR_01603.1	-0.830531	0.562322	10.2091	18.1552	FALSE	0.465296	protein phosphatase 1 regulatory subunit	483	20	2.25783e-63	60.45%	1	F:protein binding	0	IPR001611; IPR003591; IPR003603; IPR025875; G3DSA:3.80.10.10 (GENE3D), PTHR10588 (PANTHER), SM00365 (SMART), SSF52058 (SUPERFAMILY)
LCOR_01604.1	-1.43427	0.370035	110.595	298.878	TRUE	0.00945746	hypothetical protein RO3G_09471	109	7	2.39004e-58	73.86%	0	0		IPR019727; tmhmm (TMHMM)
LCOR_01605.1	-0.837196	0.559731	9.55806	17.0762	FALSE	0.481422	glycosyltransferase family 15 protein	690	20	4.17157e-75	60.05%	5	F:mannosyltransferase activity; P:protein glycosylation; F:protein binding; F:serine-type endopeptidase activity; C:integral to membrane	EC:3.4.21.0	IPR002685; IPR003892; IPR009060; IPR022764; G3DSA:3.90.550.10 (GENE3D), PTHR31121 (PANTHER), SignalP-NN(euk) (SIGNALP), tmhmm (TMHMM), SSF144091 (SUPERFAMILY), SSF53448 (SUPERFAMILY)
LCOR_01606.1	-0.437321	0.738505	13.5312	18.3224	FALSE	0.833281	hypothetical protein RO3G_08633	306	1	1.45474e-67	63.0%	0	0		G3DSA:3.10.450.50 (GENE3D), SSF54427 (SUPERFAMILY)
LCOR_01607.1	0.136033	1.09888	20.1003	18.2917	FALSE	0.224809	---NA---	274	0			0	0		tmhmm (TMHMM)
LCOR_01608.1	-0.533725	0.690769	27.0992	39.2305	FALSE	1	wd repeat-containing protein 5	390	20	1.08476e-172	88.15%	1	F:protein binding	0	IPR001680; IPR015943; IPR017986; IPR019775; IPR020472; PTHR22847 (PANTHER), PTHR22847:SF48 (PANTHER)
LCOR_01609.1	-1.00346	0.498803	4.46631	8.95405	FALSE	0.182177	cytokinesis protein bni1	1482	20	3.33034e-84	51.45%	3	F:actin binding; P:actin cytoskeleton organization; F:Rho GTPase binding	0	IPR003104; IPR010472; IPR010473; IPR014768; IPR015425; IPR016024; PTHR23213 (PANTHER)
LCOR_01610.1	Inf	Inf	0.283791	0	FALSE	0.303522	---NA---	111	0			0	0		no IPS match
LCOR_01611.1	-1.49594	0.354549	23.9334	67.5039	TRUE	0.00553749	cullin family protein	765	20	0	74.45%	3	P:ubiquitin-dependent protein catabolic process; C:cullin-RING ubiquitin ligase complex; F:ubiquitin protein ligase binding	0	IPR001373; IPR011991; IPR016157; IPR016158; IPR016159; IPR019559; G3DSA:1.20.1310.10 (GENE3D), G3DSA:4.10.1030.10 (GENE3D), PTHR11932 (PANTHER), PTHR11932:SF19 (PANTHER), SSF46785 (SUPERFAMILY)
LCOR_01612.1	-1.57279	0.336157	1.43397	4.26576	FALSE	0.0480532	rna binding protein	610	20	0	55.65%	5	F:nucleic acid binding; C:intracellular; F:zinc ion binding; F:exonuclease activity; F:nucleotide binding	0	IPR000504; IPR001876; IPR006055; IPR012337; IPR012677; IPR013520; G3DSA:3.30.420.10 (GENE3D), PTHR23111 (PANTHER), PTHR23111:SF12 (PANTHER), SSF54928 (SUPERFAMILY), SSF90209 (SUPERFAMILY)
LCOR_01613.1	-0.530925	0.692111	99.9527	144.417	FALSE	0.954941	calcium calmodulin dependent protein	353	20	3.56415e-127	67.6%	4	F:ATP binding; P:protein phosphorylation; F:protein serine/threonine kinase activity; F:protein tyrosine kinase activity	EC:2.7.11.0; EC:2.7.10.0	IPR000719; IPR002290; IPR008271; IPR011009; IPR017441; IPR020635; IPR020636; G3DSA:1.10.510.10 (GENE3D), G3DSA:3.30.200.20 (GENE3D), SignalP-NN(euk) (SIGNALP)
LCOR_01614.1	-1.30362	0.405109	3.73674	9.22404	FALSE	0.0442535	---NA---	642	0			0	0		IPR018611; PTHR31057 (PANTHER), PTHR31057:SF0 (PANTHER)
LCOR_01615.1	-0.0778236	0.947486	2.65599	2.8032	FALSE	0.504643	high osmolarity signaling protein	292	5	3.18049e-26	50.2%	1	F:protein binding	0	IPR001452; G3DSA:2.30.30.40 (GENE3D), PTHR22820 (PANTHER), PTHR22820:SF19 (PANTHER), SignalP-NN(euk) (SIGNALP), tmhmm (TMHMM)
LCOR_01616.1	-0.842526	0.557666	0.0824447	0.147839	FALSE	1	---NA---	136	0			0	0		no IPS match
LCOR_01617.1	-1.26507	0.41608	110.932	266.613	FALSE	0.0331584	gtp-binding protein ypt3	210	20	1.88319e-141	90.1%	8	F:GTP binding; P:small GTPase mediated signal transduction; F:GTPase activity; P:GTP catabolic process; P:intracellular protein transport; P:nucleocytoplasmic transport; C:intracellular; C:membrane	0	IPR001806; IPR002041; IPR003578; IPR003579; IPR005225; IPR020849; IPR027417; G3DSA:3.40.50.300 (GENE3D), PTHR24073 (PANTHER), PTHR24073:SF87 (PANTHER), PS51419 (PROFILE)
LCOR_01618.1	-0.680838	0.623803	35.9817	57.6811	FALSE	0.783246	upf0549 protein c20orf43 homolog isoform 1	296	20	5.14195e-94	67.75%	3	F:molecular_function; P:biological_process; C:cellular_component		IPR006735; IPR013083; PF04641 (PFAM), SSF57850 (SUPERFAMILY)
LCOR_01619.1	-0.453855	0.73009	11.6845	16.0042	FALSE	0.833201	swi snf-related matrix-associated actin-dependent regulator of chromatin subfamily a-like protein 1	737	20	8.30261e-110	54.7%	4	F:DNA binding; F:ATP binding; F:helicase activity; F:zinc ion binding	0	IPR000330; IPR001650; IPR010666; IPR014001; IPR027417; G3DSA:3.40.50.300 (GENE3D), PTHR10799 (PANTHER), PTHR10799:SF43 (PANTHER)
LCOR_01620.1	-0.91303	0.531068	22.7469	42.8323	FALSE	0.408239	ybr147w-like protein	276	20	6.12964e-50	57.1%	0	0		IPR006603; PTHR16201 (PANTHER), PTHR16201:SF6 (PANTHER), PF04193 (PFAM), tmhmm (TMHMM)
LCOR_01621.1	-1.12079	0.459841	109.992	239.195	FALSE	0.192462	pap2-domain-containing protein	317	20	2.63724e-99	65.35%	2	F:catalytic activity; C:membrane	0	IPR000326; IPR016118; PTHR10165 (PANTHER), PTHR10165:SF46 (PANTHER), SignalP-NN(euk) (SIGNALP), tmhmm (TMHMM)
LCOR_01622.1	1.26207	2.3984	0.0782364	0.0326203	FALSE	1	methyltransferase type 11	288	13	1.23666e-103	51.38%	4	F:methyltransferase activity; F:transferase activity; P:metabolic process; P:methylation		IPR025714; G3DSA:3.40.50.150 (GENE3D), PTHR10108 (PANTHER), SSF53335 (SUPERFAMILY)
LCOR_01623.1	-Inf	0	0	0.0367908	FALSE	1	hypothetical protein RO3G_01689	233	1	3.73774e-39	67.0%	3	F:mannosyltransferase activity; P:protein glycosylation; C:membrane	0	IPR002685; G3DSA:3.90.550.10 (GENE3D), PTHR31121 (PANTHER), SignalP-NN(euk) (SIGNALP), tmhmm (TMHMM), SSF53448 (SUPERFAMILY)
LCOR_01624.1	-Inf	0	0	0.0871296	FALSE	0.698654	mnt2 alpha- -mannosyl transferase	197	20	1.1082e-46	70.85%	3	F:mannosyltransferase activity; P:protein glycosylation; C:membrane	0	IPR002685; G3DSA:3.90.550.10 (GENE3D), PTHR31121 (PANTHER), SSF53448 (SUPERFAMILY)
LCOR_01626.1	-0.826783	0.563785	14.401	25.5435	FALSE	0.56026	patatin-like serine	1659	20	0	62.1%	2	F:lysophospholipase activity; P:phosphatidylcholine metabolic process	EC:3.1.1.5	IPR000595; IPR001423; IPR002641; IPR014710; IPR016035; IPR018490; G3DSA:3.40.1090.10 (GENE3D), PTHR14226 (PANTHER), PTHR14226:SF8 (PANTHER), tmhmm (TMHMM)
LCOR_01627.1	-1.46617	0.361943	267.63	739.426	TRUE	0.00916066	cox5a-domain-containing protein	138	20	2.49185e-67	78.8%	2	F:cytochrome-c oxidase activity; C:mitochondrial inner membrane	EC:1.9.3.1	IPR003204; PTHR14200:SF8 (PANTHER)
LCOR_01628.1	-1.15883	0.447875	124.263	277.45	FALSE	0.0750781	potential mitochondrial complex 21_18kd subunit	156	20	1.31196e-53	68.55%	1	P:electron transport chain	0	IPR006885; G3DSA:3.30.160.190 (GENE3D), PTHR12219:SF2 (PANTHER)
LCOR_01629.1	-1.01439	0.495038	1.95892	3.95711	FALSE	0.361422	atp-dependent protease la	837	20	0	62.95%	5	F:ATP-dependent peptidase activity; P:proteolysis; F:ATP binding; F:serine-type endopeptidase activity; P:protein catabolic process	EC:3.4.21.0	IPR003111; IPR003593; IPR003959; IPR004815; IPR008268; IPR008269; IPR014721; IPR015947; IPR020568; IPR027065; IPR027417; PR00830 (PRINTS), G3DSA:1.10.8.60 (GENE3D), G3DSA:3.40.50.300 (GENE3D), PTHR10046:SF24 (PANTHER)
LCOR_01630.1	-0.0692714	0.953119	74.064	77.707	FALSE	0.177927	cytochrome c oxidase assembly protein cox15	463	20	7.6307e-177	68.4%	3	P:heme a biosynthetic process; C:membrane; P:oxidation-reduction process	0	IPR003780; PTHR23289 (PANTHER), tmhmm (TMHMM)
LCOR_01631.1	-0.0599873	0.959273	0.0729691	0.0760671	FALSE	1	mfs monosaccharide	493	20	9.48411e-151	60.25%	3	F:substrate-specific transmembrane transporter activity; P:transmembrane transport; C:integral to membrane	0	IPR003663; IPR005828; IPR005829; IPR016196; IPR020846; G3DSA:1.20.1250.20 (GENE3D), PTHR24063 (PANTHER), SignalP-NN(euk) (SIGNALP), tmhmm (TMHMM)
LCOR_01634.1	-Inf	0	0	0.0996858	FALSE	0.698654	---NA---	187	0			0	0		tmhmm (TMHMM)
LCOR_01635.1	1.11599	2.16744	171.976	79.3451	TRUE	5.86522e-06	calcium calmodulin-dependent protein kinase kinase 1	359	20	3.0891e-75	60.3%	4	F:ATP binding; P:protein phosphorylation; F:protein serine/threonine kinase activity; F:protein tyrosine kinase activity	EC:2.7.11.0; EC:2.7.10.0	IPR000719; IPR002290; IPR008271; IPR011009; IPR017441; IPR020635; IPR020636; G3DSA:1.10.510.10 (GENE3D), G3DSA:3.30.200.20 (GENE3D), PTHR24347:SF1 (PANTHER)
LCOR_01636.1	-0.879332	0.543619	489.005	899.536	FALSE	0.43292	40s ribosomal protein s12	120	20	8.51605e-75	88.45%	3	F:structural constituent of ribosome; C:ribosome; P:translation	0	IPR000530; IPR004038; G3DSA:3.30.1330.30 (GENE3D), SSF55315 (SUPERFAMILY)
LCOR_01637.1	-0.543124	0.686283	280.14	408.199	FALSE	0.969799	60s ribosomal protein l23a	146	20	4.52521e-65	83.5%	4	F:nucleotide binding; F:structural constituent of ribosome; C:ribosome; P:translation	0	IPR001014; IPR005633; IPR012677; IPR012678; IPR013025; PTHR11620 (PANTHER)
LCOR_01638.1	0.138808	1.101	4.87107	4.42424	FALSE	0.0475233	potential u3 snornp-associated helicase ecm16	1139	20	0	64.65%	3	F:nucleic acid binding; F:ATP binding; F:ATP-dependent helicase activity	0	IPR001650; IPR002464; IPR003593; IPR007502; IPR011545; IPR011709; IPR014001; IPR027417; G3DSA:3.40.50.300 (GENE3D), PTHR18934 (PANTHER), PTHR18934:SF68 (PANTHER)
LCOR_01639.1	-0.142075	0.906215	171.114	188.822	FALSE	0.224518	3-ketoacyl- reductase	316	20	1.73703e-131	63.6%	2	P:metabolic process; F:oxidoreductase activity	0	IPR002198; IPR002347; IPR016040; IPR020904; PTHR24322 (PANTHER), PTHR24322:SF30 (PANTHER), SignalP-NN(euk) (SIGNALP), SSF51735 (SUPERFAMILY)
LCOR_01640.1	-0.533615	0.690822	138.668	200.729	FALSE	1	px domain protein	829	20	0	51.85%	3	F:protein binding; P:cell communication; F:phosphatidylinositol binding	0	IPR001683; IPR024554; IPR024555; PTHR11632 (PANTHER), PTHR11632:SF1 (PANTHER)
LCOR_01641.1	-1.22335	0.428287	9.46012	22.0883	FALSE	0.165342	membrane protein	114	20	6.9217e-36	70.95%	1	C:integral to membrane		IPR009305; tmhmm (TMHMM)
LCOR_01642.1	-1.44671	0.366858	32.9934	89.935	TRUE	0.00615098	peptidyl-prolyl cis-trans isomerase h	174	20	1.23538e-107	84.7%	2	F:peptidyl-prolyl cis-trans isomerase activity; P:protein folding	EC:5.2.1.8	IPR002130; IPR020892; IPR024936; G3DSA:2.40.100.10 (GENE3D), PTHR11071 (PANTHER), PTHR11071:SF58 (PANTHER)
LCOR_01643.1	-0.225016	0.855586	69.8453	81.6345	FALSE	0.430468	hypothetical protein RO3G_04440	364	1	1.24294e-85	64.0%	0	0		tmhmm (TMHMM)
LCOR_01644.1	3.69045	12.9103	0.461857	0.0357744	FALSE	0.0431967	meiotic expression up-regulated protein 26	262	20	3.32723e-44	64.55%	0	0		no IPS match
LCOR_01646.1	-0.152104	0.899937	6.44573	7.16242	FALSE	0.4558	wd40 repeat-like protein	415	20	2.54764e-118	60.8%	1	F:protein binding	0	IPR001680; IPR001810; IPR015943; IPR017986; IPR019775; IPR020472; G3DSA:1.20.1280.50 (GENE3D), PTHR22844 (PANTHER), PTHR22844:SF7 (PANTHER), PF12937 (PFAM)
LCOR_01647.1	-0.336764	0.791815	3.33625	4.21342	FALSE	0.698654	trna (uracil-o -)-methyltransferase protein	450	20	1.44246e-69	56.45%	1	F:methyltransferase activity	EC:2.1.1.0	IPR011671; G3DSA:3.40.50.150 (GENE3D), PTHR21210 (PANTHER), PTHR21210:SF0 (PANTHER), SSF53335 (SUPERFAMILY)
LCOR_01648.1	-0.350674	0.784218	15.0589	19.2025	FALSE	0.754324	---NA---	312	0			0	0		SignalP-NN(euk) (SIGNALP), tmhmm (TMHMM)
LCOR_01649.1	-0.51046	0.701999	9.76259	13.9069	FALSE	0.975673	---NA---	418	0			3	P:mitotic spindle organization in nucleus; C:DASH complex; C:mitotic spindle	0	IPR013964
LCOR_01650.1	-0.309665	0.806829	4.50326	5.58142	FALSE	0.742223	---NA---	194	0			2	F:zinc ion binding; F:nucleic acid binding	0	IPR007087; IPR013087; IPR015880; PTHR11389 (PANTHER), PF13465 (PFAM), SSF57667 (SUPERFAMILY)
LCOR_01651.1	-1.42138	0.373356	9.96708	26.6959	FALSE	0.0464674	pterin-4-alpha-carbinolamine dehydratase-like	120	20	7.33777e-47	80.45%	2	P:tetrahydrobiopterin biosynthetic process; F:4-alpha-hydroxytetrahydrobiopterin dehydratase activity	EC:4.2.1.96	IPR001533; PTHR12599:SF0 (PANTHER)
LCOR_01652.1	-1.03759	0.487141	31.3518	64.3589	FALSE	0.227123	splicing factor 3b subunit 5	84	20	5.27045e-46	89.35%	4	P:mitotic spindle organization; P:nuclear mRNA splicing, via spliceosome; C:precatalytic spliceosome; C:nucleus		IPR009846; IPR017089; PTHR20978:SF0 (PANTHER)
LCOR_01653.1	-1.10492	0.464929	8.55469	18.4	FALSE	0.154535	exosome complex component rrp45	286	20	7.25294e-104	75.65%	19	F:RNA binding; P:RNA processing; F:3'-5'-exoribonuclease activity; C:nuclear exosome (RNase complex); P:exonucleolytic nuclear-transcribed mRNA catabolic process involved in deadenylation-dependent decay; C:nucleus; F:hydrolase activity; P:rRNA processing; P:nuclear polyadenylation-dependent rRNA catabolic process; C:cytoplasm; F:AU-rich element binding; P:nuclear-transcribed mRNA catabolic proce…		IPR001247; IPR015847; IPR020568; IPR027408; PTHR11097 (PANTHER), PTHR11097:SF8 (PANTHER)
LCOR_01654.1	-1.09038	0.469637	8.79164	18.7201	FALSE	0.115605	hypothetical protein RO3G_05308	985	1	2.33565e-59	58.0%	0	0		IPR021419; PTHR12433 (PANTHER)
LCOR_01655.1	0.0446987	1.03147	17.5926	17.0559	FALSE	0.235702	---NA---	99	0			0	0		no IPS match
LCOR_01656.1	1.27441	2.419	0.209969	0.0867996	FALSE	0.174154	phosphoglucose isomerase	555	20	0	81.25%	3	F:glucose-6-phosphate isomerase activity; P:gluconeogenesis; P:glycolysis	EC:5.3.1.9	IPR001672; IPR018189; IPR023096; G3DSA:3.40.50.10490 (GENE3D), PTHR11469:SF0 (PANTHER), SSF53697 (SUPERFAMILY)
LCOR_01657.1	-0.3906	0.762813	82.3833	107.999	FALSE	0.745515	hypothetical protein RO3G_16398	81	1	5.81714e-26	75.0%	0	0		IPR015419
LCOR_01658.1	-1.20665	0.433274	1.19371	2.75509	FALSE	0.318107	---NA---	334	0			0	0		no IPS match
LCOR_01659.1	-1.27186	0.414126	318.978	770.242	FALSE	0.0474595	atp synthase delta mitochondrial	161	20	2.36238e-67	76.45%	1	P:ATP synthesis coupled proton transport	0	IPR001469; IPR020546; G3DSA:1.20.5.440 (GENE3D), PTHR13822:SF1 (PANTHER)
LCOR_01660.1	-0.876283	0.544769	43.2689	79.426	FALSE	0.382761	coatomer beta subunit	1357	20	0	78.5%	5	P:intracellular protein transport; P:vesicle-mediated transport; F:structural molecule activity; C:COPI vesicle coat; F:binding	0	IPR002553; IPR011710; IPR011989; IPR016024; IPR016460
LCOR_01661.1	-0.572469	0.672465	30.2734	45.0185	FALSE	1	---NA---	191	0			0	0		IPR025714; G3DSA:3.40.50.150 (GENE3D), PTHR12176 (PANTHER), SSF53335 (SUPERFAMILY)
LCOR_01662.1	-0.9486	0.518135	14.6503	28.2751	FALSE	0.261968	p-loop containing nucleoside triphosphate hydrolase protein	1123	20	0	83.0%	3	F:ATP binding; F:ATP-dependent helicase activity; F:RNA binding	0	IPR001650; IPR002464; IPR003029; IPR007502; IPR011545; IPR011709; IPR012340; IPR014001; IPR022967; IPR027417; G3DSA:3.40.50.300 (GENE3D), PTHR18934 (PANTHER)
LCOR_01663.1	2.4861	5.60261	26.8991	4.80118	TRUE	1.64707e-11	phosphoglucose isomerase	548	20	0	81.65%	3	F:glucose-6-phosphate isomerase activity; P:gluconeogenesis; P:glycolysis	EC:5.3.1.9	IPR001672; IPR018189; IPR023096; G3DSA:3.40.50.10490 (GENE3D), PTHR11469:SF0 (PANTHER), tmhmm (TMHMM), SSF53697 (SUPERFAMILY)
LCOR_01664.1	0.88558	1.84751	189.59	102.619	TRUE	1.23341e-05	---NA---	366	0			0	0		SignalP-NN(euk) (SIGNALP), tmhmm (TMHMM)
LCOR_01665.1	1.17584	2.25924	72.0273	31.8812	TRUE	0.000441674	thioredoxin reductase	330	20	1.98676e-158	82.95%	4	P:oxidation-reduction process; F:thioredoxin-disulfide reductase activity; C:cytoplasm; P:removal of superoxide radicals	EC:1.8.1.9	IPR000103; IPR005982; IPR008255; IPR013027; IPR023753; G3DSA:3.50.50.60 (GENE3D), PTHR22912 (PANTHER), PTHR22912:SF48 (PANTHER), SSF51905 (SUPERFAMILY)
LCOR_01666.1	1.90335	3.7408	86.4864	23.1197	TRUE	1.74077e-09	hcp-like protein	555	20	0	79.7%	1	F:protein binding	0	IPR006597; IPR011990; PTHR11102 (PANTHER), PTHR11102:SF12 (PANTHER), SSF81901 (SUPERFAMILY)
LCOR_01667.1	-0.688122	0.620661	59.0415	95.1267	FALSE	0.76626	vacuolar sorting protein vps24	222	20	3.59475e-33	73.85%	1	P:protein transport	0	IPR005024; PTHR10476 (PANTHER), PTHR10476:SF1 (PANTHER)
LCOR_01668.1	-1.78615	0.289944	32.7937	113.104	TRUE	0.000203426	proteasome regulatory particle subunit	495	20	0	72.8%	4	F:protein binding; C:proteasome complex; F:enzyme regulator activity; P:regulation of protein catabolic process	0	IPR000717; IPR011990; IPR011991; IPR013143; IPR013586; PTHR10758 (PANTHER), PTHR10758:SF2 (PANTHER), SSF46785 (SUPERFAMILY)
LCOR_01669.1	0.0984963	1.07066	11.1152	10.3817	FALSE	0.0748715	---NA---	453	0			2	F:nucleic acid binding; F:zinc ion binding	0	IPR003604; IPR007087; IPR022755; SSF57667 (SUPERFAMILY)
LCOR_01670.1	1.15748	2.23068	92.7307	41.5706	TRUE	2.79537e-08	---NA---	336	0			2	F:protein binding; F:phospholipid binding	0	IPR001849; IPR011993; PTHR22902 (PANTHER), PTHR22902:SF8 (PANTHER), SSF50729 (SUPERFAMILY)
LCOR_01671.1	1.07628	2.10859	109.912	52.1259	TRUE	1.73398e-06	---NA---	455	0			1	F:protein binding	0	IPR000048
LCOR_01672.1	-1.42615	0.372122	46.4579	124.846	TRUE	0.00829776	alternative splicing factor asf	264	20	2.01063e-56	65.9%	2	F:nucleic acid binding; F:nucleotide binding	0	IPR000504; IPR012677; PTHR10548 (PANTHER), SSF54928 (SUPERFAMILY)
LCOR_01673.1	-1.51678	0.349466	1.21788	3.48499	FALSE	0.108534	endonuclease v	339	20	1.12909e-60	66.6%	2	F:endonuclease activity; P:DNA repair	0	IPR007581; SignalP-NN(euk) (SIGNALP)
LCOR_01675.1	-0.0336867	0.976921	20.9176	21.4118	FALSE	0.157699	bifunctional pyrimidine biosynthesis protein	2240	20	0	78.6%	7	F:aspartate carbamoyltransferase activity; P:'de novo' pyrimidine nucleobase biosynthetic process; F:ATP binding; F:amino acid binding; P:glutamine catabolic process; P:carbamoyl phosphate biosynthetic process; F:metal ion binding	EC:2.1.3.2	IPR002082; IPR002474; IPR005479; IPR005480; IPR005481; IPR005483; IPR006130; IPR006131; IPR006132; IPR006274; IPR006275; IPR011607; IPR011761; IPR013815; IPR013816; IPR016185; IPR017926; PR00099 (PRINTS), G3DSA:3.20.20.140 (GENE3D), G3DSA:3.40.50.880 (GENE3D), PTHR11405 (PANTHER), PTHR11405:SF3 (PANTHER), SSF51556 (SUPERFAMILY), SSF52317 (SUPERFAMILY), SSF56059 (SUPERFAMILY)
LCOR_01676.1	-0.888196	0.540289	3.19208	5.9081	FALSE	0.366632	related to cch1-calcium channel (alpha subunit)	1954	20	0	56.15%	4	F:ion channel activity; P:ion transport; C:membrane; P:transmembrane transport	0	IPR005821; IPR027359; PTHR10037 (PANTHER), PTHR10037:SF40 (PANTHER), tmhmm (TMHMM), SSF81324 (SUPERFAMILY)
LCOR_01677.1	-0.480266	0.716845	0.1062	0.148149	FALSE	1	short-chain dehydrogenase reductase sdr	316	20	0	68.95%	2	P:metabolic process; F:oxidoreductase activity	0	IPR002198; IPR002347; IPR016040; IPR020904; PTHR24322 (PANTHER), SSF51735 (SUPERFAMILY)
LCOR_01678.1	0.8832	1.84446	437.254	237.063	TRUE	9.27096e-05	phosphatidylserine synthase	226	20	9.69662e-77	73.7%	2	P:phospholipid biosynthetic process; C:membrane	0	IPR000462; IPR004533; PTHR15362 (PANTHER), PTHR15362:SF1 (PANTHER), tmhmm (TMHMM)
LCOR_01679.1	0.165443	1.12151	188.446	168.029	FALSE	0.0287609	hypothetical protein RO3G_07942	263	2	1.10759e-79	64.0%	0	0		PS51257 (PROFILE), SignalP-NN(euk) (SIGNALP)
LCOR_01680.1	-1.0401	0.486295	6.07684	12.4962	FALSE	0.264144	transcription factor	578	20	1.35809e-99	54.95%	3	F:RNA polymerase II core promoter proximal region sequence-specific DNA binding; F:RNA polymerase II core promoter proximal region sequence-specific DNA binding transcription factor activity; C:nucleus	0	IPR008967; IPR015350; IPR015351; G3DSA:2.80.10.50 (GENE3D), PTHR10665 (PANTHER), PTHR10665:SF0 (PANTHER)
LCOR_01682.1	-1.31629	0.401565	3.90833	9.73275	FALSE	0.104676	lysine-specific permease	533	20	0	68.1%	3	P:amino acid transmembrane transport; F:amino acid transmembrane transporter activity; C:integral to membrane	0	IPR002293; IPR004840; IPR004841; PTHR11785:SF80 (PANTHER), tmhmm (TMHMM)
LCOR_01683.1	-0.797162	0.57548	205.694	357.43	FALSE	0.576672	cc42_canal cell division control protein 42	191	20	1.43802e-130	95.0%	7	F:GTP binding; P:small GTPase mediated signal transduction; C:intracellular; P:protein transport; F:GTPase activity; P:GTP catabolic process; C:membrane	0	IPR001806; IPR003578; IPR003579; IPR005225; IPR020849; IPR027417; G3DSA:3.40.50.300 (GENE3D), PTHR24072 (PANTHER), PTHR24072:SF1 (PANTHER)
LCOR_01684.1	-1.31391	0.40223	45.7036	113.626	FALSE	0.0853905	mitochondrial pyruvate carrier 1-like	116	20	1.92099e-41	64.5%	0	0		IPR005336; PTHR14154 (PANTHER), PTHR14154:SF3 (PANTHER), tmhmm (TMHMM)
LCOR_01685.1	-0.788013	0.579141	31.1786	53.8358	FALSE	0.52696	exocyst complex component 7 isoform 1	623	20	4.87592e-174	49.7%	2	C:exocyst; P:exocytosis	0	IPR004140; IPR016159
LCOR_01686.1	-1.21399	0.431074	44.1641	102.451	FALSE	0.0462393	delta(24(24 ))-sterol reductase	450	20	0	68.05%	2	C:membrane; P:oxidation-reduction process	0	IPR001171; IPR018083; PTHR21257 (PANTHER), PTHR21257:SF4 (PANTHER), tmhmm (TMHMM)
LCOR_01687.1	-0.552538	0.68182	15.3335	22.4891	FALSE	1	---NA---	86	0			0	0		no IPS match
LCOR_01688.1	0.157474	1.11533	0.166108	0.148931	FALSE	1	---NA---	67	0			0	0		no IPS match
LCOR_01689.1	-0.187705	0.878001	97.6167	111.181	FALSE	0.253384	---NA---	129	0			0	0		SignalP-NN(euk) (SIGNALP)
LCOR_01690.1	-2.78152	0.145438	1.16863	8.03523	TRUE	4.01072e-06	---NA---	415	0			0	0		no IPS match
LCOR_01691.1	1.0924	2.13228	114.546	53.72	TRUE	9.91462e-07	---NA---	270	0			0	0		no IPS match
LCOR_01692.1	-0.697631	0.616584	7.54943	12.244	FALSE	0.837956	cytoplasmic trna 2-thiolation protein 2-like	434	20	1.38145e-89	47.35%	8	C:cytoplasm; P:tRNA processing; C:protein complex; F:tRNA binding; C:cytosol; P:tRNA wobble uridine modification; C:soluble fraction; P:tRNA thio-modification		IPR019407; PTHR20882 (PANTHER), SSF52402 (SUPERFAMILY)
LCOR_01693.1	1.01685	2.0235	141.365	69.8615	TRUE	0.000214344	dienelactone hydrolase family protein	245	20	3.48948e-85	56.95%	1	F:hydrolase activity	0	IPR002925; G3DSA:3.40.50.1820 (GENE3D), PTHR17630 (PANTHER), PTHR17630:SF19 (PANTHER), SSF53474 (SUPERFAMILY)
LCOR_01694.1	-0.501691	0.706278	28.3809	40.1837	FALSE	0.987776	---NA---	95	0			0	0		IPR012875
LCOR_01695.1	-1.48409	0.357473	20.6907	57.8804	TRUE	0.00281232	diacylglycerol acyltransferase dgat2	502	20	2.21114e-124	60.25%	1	F:O-acyltransferase activity	0	IPR004299; IPR014371; PTHR10408:SF0 (PANTHER), tmhmm (TMHMM)
LCOR_01696.1	-1.57031	0.336737	2.00589	5.95684	FALSE	0.01592	acyl- oxidase	679	20	5.1721e-179	56.7%	5	F:acyl-CoA oxidase activity; C:peroxisome; P:fatty acid beta-oxidation; F:acyl-CoA dehydrogenase activity; F:flavin adenine dinucleotide binding	EC:1.3.3.6; EC:1.3.99.3	IPR002655; IPR006091; IPR009075; IPR009100; IPR012258; IPR013786; G3DSA:1.20.140.10 (GENE3D), PTHR10909 (PANTHER)
LCOR_01697.1	0.36715	1.2898	70.0818	54.3353	TRUE	0.00238757	hypothetical protein RO3G_06960	166	1	4.04023e-55	77.0%	0	0		IPR005605; tmhmm (TMHMM)
LCOR_01698.1	-0.304067	0.809966	10.5279	12.998	FALSE	0.604203	dimethyladenosine transferase	332	20	1.35652e-154	75.3%	2	P:rRNA modification; F:rRNA (adenine) methyltransferase activity	0	IPR001737; IPR011530; IPR020596; IPR020598; IPR025814; G3DSA:3.40.50.150 (GENE3D), SSF53335 (SUPERFAMILY)
LCOR_01699.1	0.633975	1.55184	212.895	137.189	TRUE	0.000465357	---NA---	267	0			2	F:nucleic acid binding; F:nucleotide binding	0	IPR000504; IPR012677; IPR025715; PTHR19965 (PANTHER), PTHR19965:SF8 (PANTHER), SSF54928 (SUPERFAMILY)
LCOR_01700.1	-0.523761	0.695556	14.3687	20.6578	FALSE	0.978683	protein transporter sec24-like cef protein	1016	20	0	61.3%	5	F:protein binding; P:intracellular protein transport; P:ER to Golgi vesicle-mediated transport; F:zinc ion binding; C:COPII vesicle coat	0	IPR002035; IPR006895; IPR006896; IPR006900; IPR007123; IPR012990; G3DSA:3.40.20.10 (GENE3D), PTHR13803 (PANTHER), PTHR13803:SF0 (PANTHER), SSF53300 (SUPERFAMILY), SSF81995 (SUPERFAMILY), SSF82754 (SUPERFAMILY)
LCOR_01701.1	-1.5487	0.341817	7.49421	21.9246	TRUE	0.00415849	nucleoporin pom152	1218	20	0	49.1%	0	0		tmhmm (TMHMM)
LCOR_01702.1	-0.942684	0.520264	25.4299	48.8788	FALSE	0.284569	---NA---	251	0			0	0		no IPS match
LCOR_01703.1	-0.856525	0.552281	115.593	209.3	FALSE	0.506455	calcium proton exchanger	386	20	4.50644e-115	71.3%	4	C:integral to membrane; P:transmembrane transport; P:calcium ion transport; F:calcium:hydrogen antiporter activity	0	IPR004713; IPR004798; IPR004837; PTHR31503 (PANTHER), SignalP-NN(euk) (SIGNALP), tmhmm (TMHMM)
LCOR_01704.1	-1.28347	0.410806	27.7905	67.6488	FALSE	0.0210675	methylthioribulose-1-phosphate dehydratase	238	20	1.03762e-146	79.1%	3	F:metal ion binding; C:cytoplasm; P:L-methionine salvage from methylthioadenosine	0	IPR001303; IPR017714
LCOR_01705.1	-0.829696	0.562648	27.5886	49.0335	FALSE	0.467786	ubx domain protein	480	20	2.78411e-69	56.75%	1	F:protein binding	0	IPR001012; IPR006577; IPR009060; IPR012336; G3DSA:1.10.8.10 (GENE3D), G3DSA:3.10.20.90 (GENE3D), PTHR23322 (PANTHER), PTHR23322:SF6 (PANTHER), PF13899 (PFAM), SSF54236 (SUPERFAMILY)
LCOR_01706.1	-1.20679	0.433231	31.9016	73.6366	FALSE	0.046185	protein farnesyltransferase geranylgeranyltransferase type-1 subunit alpha-like	305	20	2.34587e-98	65.0%	2	F:protein prenyltransferase activity; P:protein prenylation	0	IPR002088; G3DSA:1.25.40.120 (GENE3D), PTHR11129 (PANTHER), PTHR11129:SF1 (PANTHER), SSF48439 (SUPERFAMILY)
LCOR_01707.1	-0.709431	0.611561	13.847	22.642	FALSE	0.723541	4-aminobutyrate aminotransferase	491	20	0	70.5%	3	F:4-aminobutyrate transaminase activity; P:gamma-aminobutyric acid metabolic process; F:pyridoxal phosphate binding	EC:2.6.1.19	IPR004631; IPR005814; IPR015421; IPR015422; IPR015424; PIRSF000521 (PIR), SignalP-NN(euk) (SIGNALP)
LCOR_01708.1	0.246575	1.18639	35.4692	29.8968	FALSE	0.0115582	protein fra10ac1 homolog	251	20	2.41262e-55	73.95%	0	0		IPR019129; PTHR11567 (PANTHER), PTHR11567:SF25 (PANTHER)
LCOR_01709.1	1.31703	2.49152	0.591699	0.237485	FALSE	0.455656	---NA---	75	0			0	0		no IPS match
LCOR_01710.1	-Inf	0	0	0.46947	FALSE	0.195687	---NA---	119	0			0	0		no IPS match
LCOR_01711.1	-0.931798	0.524205	3.43983	6.562	FALSE	0.481176	wd40 repeat-like protein	506	20	0	69.9%	3	F:protein binding; C:nucleolus; P:rRNA processing	0	IPR001680; IPR015943; IPR017986; IPR018983; IPR019775; IPR020472; PTHR19924 (PANTHER), PTHR19924:SF9 (PANTHER)
LCOR_01712.1	-0.496081	0.70903	1.30111	1.83506	FALSE	0.991746	hypothetical protein RO3G_14445	299	1	8.0608e-50	55.0%	0	0		IPR018865; PTHR15243 (PANTHER), PTHR15243:SF0 (PANTHER)
LCOR_01713.1	1.11148	2.16067	16.7531	7.75368	TRUE	7.20124e-07	import receptor	589	20	2.25133e-155	64.15%	1	F:protein binding	0	IPR001440; IPR011990; IPR013026; IPR019734; PTHR22904 (PANTHER), PTHR22904:SF122 (PANTHER), PF13414 (PFAM), tmhmm (TMHMM), SSF48452 (SUPERFAMILY)
LCOR_01714.1	-0.562589	0.677086	759.754	1122.09	FALSE	1	hypothetical protein RO3G_05672	294	1	8.27921e-26	71.0%	2	F:sequence-specific DNA binding transcription factor activity; F:sequence-specific DNA binding	0	IPR004827; G3DSA:1.20.5.170 (GENE3D), PTHR13044 (PANTHER)
LCOR_01715.1	-0.841725	0.557976	0.279987	0.50179	FALSE	0.903738	related to heat shock factor protein 4	393	20	6.90832e-56	73.4%	3	F:sequence-specific DNA binding transcription factor activity; C:nucleus; F:sequence-specific DNA binding	0	IPR000232; IPR011991; PTHR10015 (PANTHER), SSF46785 (SUPERFAMILY)
LCOR_01716.1	-1.2541	0.419254	19.782	47.1839	FALSE	0.0370916	fad binding oxidoreductase	517	20	1.41449e-65	52.35%	3	F:UDP-N-acetylmuramate dehydrogenase activity; F:flavin adenine dinucleotide binding; P:oxidation-reduction process	EC:1.1.1.158	IPR006094; IPR016166; IPR016167; IPR016169; PTHR11748 (PANTHER), PTHR11748:SF33 (PANTHER)
LCOR_01717.1	-1.50842	0.351497	3.37933	9.61411	FALSE	0.0542694	probable peptidyl-trna hydrolase-like	248	20	1.60026e-37	55.15%	1	F:aminoacyl-tRNA hydrolase activity	EC:3.1.1.29	IPR001328; IPR018171; PTHR17224:SF0 (PANTHER)
LCOR_01718.1	-1.71176	0.305287	30.2358	99.0408	TRUE	0.000649793	t-complex protein 1 subunit gamma	549	20	0	90.5%	3	F:ATP binding; P:protein folding; F:unfolded protein binding	0	IPR002194; IPR002423; IPR012719; IPR017998; IPR027409; IPR027410; IPR027413; SSF54849 (SUPERFAMILY)
LCOR_01720.1	-1.74111	0.29914	13.2913	44.4317	TRUE	0.00193916	homocitrate synthase	428	20	0	87.6%	2	F:homocitrate synthase activity; P:lysine biosynthetic process via aminoadipic acid	EC:2.3.3.14	IPR000891; IPR002034; IPR011872; IPR013785; PTHR10277 (PANTHER), SSF51569 (SUPERFAMILY)
LCOR_01721.1	-Inf	0	0	0.0253093	FALSE	1	---NA---	370	0			0	0		no IPS match
LCOR_01723.1	-1.39882	0.379239	7.5067	19.7941	FALSE	0.0164192	wd40 repeat-containing protein smu1	569	20	0	67.35%	1	F:protein binding	0	IPR001680; IPR006594; IPR015943; IPR017986; IPR019775; IPR020472; PTHR22848 (PANTHER)
LCOR_01724.1	-Inf	0	0	0.0935124	FALSE	0.698654	---NA---	208	0			2	F:catalytic activity; P:metabolic process	0	IPR000873; IPR020845; G3DSA:3.40.50.980 (GENE3D), PTHR24096 (PANTHER), PTHR24096:SF16 (PANTHER), SSF56801 (SUPERFAMILY)
LCOR_01725.1	-Inf	0	0	0.197094	FALSE	0.223095	---NA---	286	0			2	F:catalytic activity; P:metabolic process	0	IPR000873; G3DSA:2.30.38.10 (GENE3D), G3DSA:3.30.300.30 (GENE3D), G3DSA:3.40.50.980 (GENE3D), PTHR24096 (PANTHER), PTHR24096:SF13 (PANTHER), SSF56801 (SUPERFAMILY)
LCOR_01726.1	-0.328488	0.796371	2.31625	2.9085	FALSE	0.960453	---NA---	167	0			0	0		no IPS match
LCOR_01727.1	-0.0700632	0.952596	0.653291	0.6858	FALSE	0.691872	amp-dependent synthetase ligase	538	20	2.88778e-40	47.45%	2	F:catalytic activity; P:metabolic process	0	IPR000873; IPR020845; G3DSA:2.30.38.10 (GENE3D), G3DSA:3.30.300.30 (GENE3D), G3DSA:3.40.50.980 (GENE3D), PTHR24096 (PANTHER), SSF56801 (SUPERFAMILY)
LCOR_01728.1	-1.02897	0.490058	5.4974	11.2179	FALSE	0.193062	---NA---	623	0			1	F:protein binding	0	IPR001810; G3DSA:3.80.10.10 (GENE3D), PTHR23125 (PANTHER), SSF52047 (SUPERFAMILY)
LCOR_01729.1	-1.16771	0.445127	11.1029	24.9431	FALSE	0.101217	gpn-loop gtpase 1 homolog	354	20	2.22588e-158	81.2%	1	F:nucleotide binding	0	IPR004130; IPR027417; G3DSA:3.40.50.300 (GENE3D), PTHR21231 (PANTHER), PTHR21231:SF1 (PANTHER)
LCOR_01730.1	-2.24962	0.210279	0.045957	0.218553	FALSE	0.468028	ypk2p	732	20	1.03896e-152	66.85%	4	F:ATP binding; P:protein phosphorylation; F:protein serine/threonine kinase activity; F:protein tyrosine kinase activity	EC:2.7.11.0; EC:2.7.10.0	IPR000719; IPR000961; IPR002290; IPR008271; IPR011009; IPR017441; IPR017892; IPR020635; G3DSA:1.10.510.10 (GENE3D), G3DSA:3.30.200.20 (GENE3D), PTHR24354 (PANTHER), PTHR24354:SF0 (PANTHER)
LCOR_01731.1	-0.784416	0.580587	265.49	457.278	FALSE	0.609534	s-phase kinase-associated protein 1a-like protein	157	20	5.01818e-92	86.25%	1	P:ubiquitin-dependent protein catabolic process	0	IPR001232; IPR011333; IPR016072; IPR016073; IPR016897
LCOR_01732.1	-0.789921	0.578376	10.9679	18.9634	FALSE	0.641199	protein bcp1	294	20	2.62506e-109	60.05%	0	0		IPR025602
LCOR_01733.1	-1.44616	0.366997	11.7723	32.0775	TRUE	0.00826436	wd40 repeat-containing protein	406	9	6.30371e-142	53.0%	1	F:protein binding	0	IPR001680; IPR006594; IPR015943; IPR017986; PTHR22847 (PANTHER)
LCOR_01734.1	1.99544	3.98737	1.29592	0.325005	TRUE	0.000649411	family drug resistance transporter	453	20	4.16009e-152	50.4%	2	C:integral to membrane; P:transmembrane transport	0	IPR011701; IPR016196; IPR020846; G3DSA:1.20.1250.20 (GENE3D), PTHR24003 (PANTHER), PTHR24003:SF124 (PANTHER), tmhmm (TMHMM)
LCOR_01735.1	-1.29928	0.40633	1.87063	4.60372	FALSE	0.188259	anaphase-promoting complex subunit 10-like	248	20	8.46557e-36	62.65%	19	P:regulation of mitotic metaphase/anaphase transition; C:anaphase-promoting complex; P:cell division; P:mitosis; P:ubiquitin-dependent protein catabolic process; P:mitotic cell cycle spindle assembly checkpoint; P:mitotic anaphase; P:protein ubiquitination; P:regulation of ubiquitin-protein ligase activity involved in mitotic cell cycle; P:cell cycle checkpoint; P:positive regulation of ubiquitin…		IPR004939; IPR008979; PTHR12936 (PANTHER)
LCOR_01736.1	-0.575622	0.670997	22.0381	32.8438	FALSE	1	alkylated dna repair protein alkb homolog 8-like	251	13	2.49796e-31	54.38%	2	F:oxidoreductase activity; P:oxidation-reduction process	0	IPR005123; IPR027450; PTHR13069 (PANTHER), SSF51197 (SUPERFAMILY)
LCOR_01738.1	0.665274	1.58587	2.87906	1.81545	FALSE	0.113516	---NA---	109	0			0	0		no IPS match
LCOR_01739.1	0.086578	1.06185	7.80037	7.34603	FALSE	0.170775	---NA---	218	0			0	0		no IPS match
LCOR_01740.1	-0.0687546	0.953461	3.19711	3.35317	FALSE	0.550894	---NA---	162	0			0	0		no IPS match
LCOR_01741.1	1.10309	2.14814	0.0747559	0.0348003	FALSE	0.802281	---NA---	269	0			2	F:catalytic activity; P:metabolic process	0	IPR000873; G3DSA:3.40.50.980 (GENE3D), PTHR24095 (PANTHER), SSF56801 (SUPERFAMILY)
LCOR_01742.1	1.05921	2.08379	0.10663	0.0511714	FALSE	1	---NA---	168	0			2	F:catalytic activity; P:metabolic process	0	IPR000873; G3DSA:2.30.38.10 (GENE3D), G3DSA:3.30.300.30 (GENE3D), PTHR24096 (PANTHER), SSF56801 (SUPERFAMILY)
LCOR_01743.1	-1.99196	0.251398	4.44122	17.6661	TRUE	0.00555887	---NA---	244	0			0	0		no IPS match
LCOR_01744.1	-1.8953	0.268817	13.0203	48.4353	TRUE	1.57778e-05	pap2-domain-containing protein	339	20	1.87275e-103	65.15%	2	F:catalytic activity; C:membrane	0	IPR000326; IPR016118; PTHR10165 (PANTHER), PTHR10165:SF46 (PANTHER), SignalP-NN(euk) (SIGNALP), tmhmm (TMHMM)
LCOR_01745.1	-1.22171	0.428775	21.5141	50.1757	FALSE	0.0440948	---NA---	425	0			0	0		IPR001623; IPR016196; IPR018253; IPR019396; PTHR24076 (PANTHER), PTHR24076:SF1 (PANTHER), tmhmm (TMHMM)
LCOR_01746.1	0.03881	1.02727	33.7891	32.8923	FALSE	0.158052	gtpase-activating protein gyp7	757	20	0	54.35%	3	F:Rab GTPase activator activity; C:intracellular; P:regulation of Rab GTPase activity	0	IPR000195; G3DSA:1.10.8.270 (GENE3D), PTHR22957 (PANTHER), PTHR22957:SF34 (PANTHER)
LCOR_01747.1	-0.950438	0.517475	18.4477	35.6495	FALSE	0.411938	hypothetical protein RO3G_17024	172	1	2.6543e-47	81.0%	0	0		IPR003789; IPR019004; IPR023168; G3DSA:1.10.1510.10 (GENE3D), SignalP-NN(euk) (SIGNALP)
LCOR_01748.1	-0.470881	0.721524	24.0867	33.383	FALSE	0.802142	translation initiation factor eif-2b subunit alpha-like	359	20	6.54465e-120	61.15%	1	P:cellular metabolic process	0	IPR000649; G3DSA:3.40.50.10470 (GENE3D), PTHR10233:SF7 (PANTHER), SSF100950 (SUPERFAMILY)
LCOR_01749.1	-0.566846	0.675091	12.5543	18.5964	FALSE	1	hypothetical protein RO3G_12516	972	3	1.47981e-67	69.0%	1	P:cell cycle arrest	0	IPR003108; IPR013889
LCOR_01750.1	-0.766455	0.58786	48.7683	82.9591	FALSE	0.597949	pyruvate carboxylase	1172	20	0	83.9%	6	F:ATP binding; F:biotin carboxylase activity; F:pyruvate carboxylase activity; P:gluconeogenesis; F:DNA binding; F:metal ion binding	EC:6.3.4.14; EC:6.4.1.1	IPR000089; IPR000891; IPR001882; IPR003379; IPR005479; IPR005481; IPR005482; IPR005930; IPR009057; IPR011053; IPR011054; IPR011761; IPR011764; IPR013785; IPR013815; IPR013816; IPR016185; G3DSA:2.40.50.100 (GENE3D), G3DSA:3.10.600.10 (GENE3D), PTHR18866 (PANTHER), SSF51569 (SUPERFAMILY), SSF56059 (SUPERFAMILY), SSF89000 (SUPERFAMILY)
LCOR_01751.1	-0.240224	0.846614	46.2474	54.6263	FALSE	0.366632	mate efflux family protein	496	20	1.96398e-180	64.25%	4	P:drug transmembrane transport; F:drug transmembrane transporter activity; F:antiporter activity; C:membrane	0	IPR002528; PTHR11206 (PANTHER), PTHR11206:SF8 (PANTHER), tmhmm (TMHMM)
LCOR_01752.1	-0.75393	0.592986	20.904	35.2521	FALSE	0.698654	kinesin family member 11	617	20	3.85139e-97	65.5%	4	F:microtubule motor activity; F:ATP binding; C:microtubule associated complex; P:microtubule-based movement	0	IPR001752; IPR019821; IPR027417; PTHR24115 (PANTHER), PTHR24115:SF160 (PANTHER)
LCOR_01753.1	-0.737985	0.599576	16.8571	28.1151	FALSE	0.802281	---NA---	182	0			4	F:microtubule motor activity; F:ATP binding; C:microtubule associated complex; P:microtubule-based movement	0	IPR001752; IPR027417; PTHR24115 (PANTHER)
LCOR_01754.1	-1.31079	0.403099	11.2647	27.9453	FALSE	0.0472519	54s ribosomal protein l7	280	20	2.79058e-141	58.4%	3	F:structural constituent of ribosome; C:ribosome; P:translation	0	IPR002132; IPR022803; PTHR11994:SF5 (PANTHER)
LCOR_01755.1	-1.20404	0.434059	17.7675	40.9334	FALSE	0.0915322	50s ribosomal protein l1	258	20	1.13412e-92	62.05%	4	F:RNA binding; F:structural constituent of ribosome; P:translation; C:large ribosomal subunit	0	IPR002143; IPR016094; IPR016095; IPR023673; IPR023674; PTHR23105 (PANTHER), PTHR23105:SF5 (PANTHER)
LCOR_01756.1	-0.872739	0.546109	51.0239	93.4317	FALSE	0.390623	uroporphyrinogen decarboxylase	366	20	0	76.2%	2	F:uroporphyrinogen decarboxylase activity; P:porphyrin-containing compound biosynthetic process	EC:4.1.1.37	IPR000257; IPR006361; G3DSA:3.20.20.210 (GENE3D), PTHR21091 (PANTHER), SSF51726 (SUPERFAMILY)
LCOR_01757.1	1.31027	2.47989	900.488	363.116	TRUE	1.18919e-08	fatty acid-2 hydroxylase	354	20	5.21916e-159	67.9%	6	F:heme binding; P:fatty acid biosynthetic process; F:oxidoreductase activity; P:oxidation-reduction process; C:endoplasmic reticulum; P:sphingolipid metabolic process	0	IPR001199; IPR006694; IPR014430; IPR018506; PTHR12863 (PANTHER), tmhmm (TMHMM)
LCOR_01758.1	-0.480738	0.716611	4.17088	5.82029	FALSE	0.933494	srf-tf-domain-containing partial	185	20	1.02794e-37	91.65%	2	F:DNA binding; F:protein dimerization activity	0	IPR002100; PTHR11945 (PANTHER), PTHR11945:SF32 (PANTHER)
LCOR_01759.1	-0.404175	0.755668	29.8579	39.5119	FALSE	0.683987	zinc finger nitric oxide synthase-interacting protein	337	20	4.5808e-73	53.2%	2	F:protein binding; F:zinc ion binding	0	IPR001841; IPR013083; IPR017907; PTHR13063 (PANTHER), PF13923 (PFAM), SSF57850 (SUPERFAMILY)
LCOR_01760.1	-0.438659	0.73782	0.426381	0.577892	FALSE	1	---NA---	152	0			0	0		no IPS match
LCOR_01761.1	0.634559	1.55246	6.32778	4.07596	FALSE	0.0472229	---NA---	112	0			0	0		no IPS match
LCOR_01762.1	-0.533746	0.690759	0.108089	0.156478	FALSE	1	---NA---	415	0			2	F:protein binding; F:zinc ion binding	0	IPR001841; IPR002867; IPR013083; IPR017907; IPR018957; PTHR11685 (PANTHER), SSF57850 (SUPERFAMILY)
LCOR_01763.1	-1.633	0.322417	10.8978	33.8003	TRUE	0.00120839	hypothetical protein RO3G_07625	639	2	1.94334e-32	61.5%	3	F:Rho guanyl-nucleotide exchange factor activity; C:intracellular; P:regulation of Rho protein signal transduction	0	IPR000219; IPR001331; PTHR12673 (PANTHER)
LCOR_01764.1	-1.37904	0.384475	19.2834	50.1551	TRUE	0.00984553	zf-dhhc-domain-containing protein	533	20	1.25283e-77	62.2%	1	F:zinc ion binding	0	IPR001594; PTHR22883 (PANTHER), SignalP-NN(euk) (SIGNALP), tmhmm (TMHMM)
LCOR_01765.1	-0.39503	0.760474	2264.07	2977.18	FALSE	0.698654	ubiquitin-40s ribosomal protein s31 fusion protein	155	20	5.30261e-58	77.75%	4	F:protein binding; F:structural constituent of ribosome; C:ribosome; P:translation	0	IPR000626; IPR002906; IPR019955; IPR019956; G3DSA:3.10.20.90 (GENE3D), PTHR10666 (PANTHER), PTHR10666:SF2 (PANTHER), SSF54236 (SUPERFAMILY)
LCOR_01766.1	-1.7218	0.30317	0.169467	0.558985	FALSE	0.234595	acyl- dehydrogenase family member 11	438	20	0	77.4%	3	P:oxidation-reduction process; F:acyl-CoA dehydrogenase activity; F:flavin adenine dinucleotide binding	EC:1.3.99.3	IPR006090; IPR006091; IPR006092; IPR009075; IPR009100; IPR013786; G3DSA:1.20.140.10 (GENE3D), PTHR10909 (PANTHER), PTHR10909:SF124 (PANTHER)
LCOR_01767.1	-Inf	0	0	0.28135	FALSE	0.698654	---NA---	91	0			0	0		no IPS match
LCOR_01768.1	-1.07296	0.475341	3.02541	6.36471	FALSE	0.303514	poly rna polymerase cid14	472	20	1.3315e-66	55.95%	1	F:nucleotidyltransferase activity	EC:2.7.7.0	IPR002058; IPR002934; G3DSA:3.30.460.10 (GENE3D), PTHR23092 (PANTHER), tmhmm (TMHMM), SSF81301 (SUPERFAMILY), SSF81631 (SUPERFAMILY)
LCOR_01769.1	-0.959482	0.514241	5.27369	10.2553	FALSE	0.288262	---NA---	728	0			0	0		no IPS match
LCOR_01770.1	-0.631165	0.645655	27.7922	43.0451	FALSE	0.884863	theronine dehydrogenase-like zn-dependent dehydrogenase	536	20	5.09526e-148	57.6%	4	F:calcium ion binding; F:zinc ion binding; F:oxidoreductase activity; P:oxidation-reduction process	0	IPR002048; IPR002085; IPR011032; IPR011992; IPR013149; IPR013154; IPR016040; IPR018247; PTHR11695:SF38 (PANTHER), tmhmm (TMHMM), SSF47473 (SUPERFAMILY), SSF51735 (SUPERFAMILY)
LCOR_01771.1	-1.19803	0.43587	6.88177	15.7886	FALSE	0.0888382	hypothetical protein RO3G_08279	453	2	3.73645e-112	62.0%	0	0		PTHR32285 (PANTHER), SignalP-NN(euk) (SIGNALP), tmhmm (TMHMM)
LCOR_01772.1	-0.179495	0.883012	73.6849	83.4472	FALSE	0.330769	camp-dependent protein kinase catalytic subunit 1	477	20	0	85.6%	4	F:ATP binding; P:protein phosphorylation; F:protein serine/threonine kinase activity; F:protein tyrosine kinase activity	EC:2.7.11.0; EC:2.7.10.0	IPR000719; IPR000961; IPR002290; IPR008271; IPR011009; IPR017441; IPR020635; G3DSA:1.10.510.10 (GENE3D), G3DSA:3.30.200.20 (GENE3D), PTHR24353 (PANTHER), PTHR24353:SF0 (PANTHER)
LCOR_01773.1	0.300083	1.23122	49.3103	40.0501	FALSE	0.0196883	protein kinase	546	20	0	70.35%	4	F:ATP binding; P:protein phosphorylation; F:protein serine/threonine kinase activity; F:protein tyrosine kinase activity	EC:2.7.11.0; EC:2.7.10.0	IPR000719; IPR002290; IPR008271; IPR011009; IPR017441; IPR020635; G3DSA:1.10.510.10 (GENE3D), G3DSA:3.30.200.20 (GENE3D), PTHR24343 (PANTHER), PTHR24343:SF40 (PANTHER)
LCOR_01774.1	0.306497	1.2367	3.80348	3.0755	FALSE	0.0926744	vamp-associated protein	355	20	5.09185e-45	70.25%	1	F:structural molecule activity	0	IPR000535; IPR008962; IPR016763; PTHR10809 (PANTHER), PTHR10809:SF6 (PANTHER), tmhmm (TMHMM)
LCOR_01775.1	-0.642827	0.640457	218.144	340.607	FALSE	0.883096	voltage-dependent ion-selective channel	283	20	1.51397e-156	72.4%	4	C:mitochondrial outer membrane; F:voltage-gated anion channel activity; P:regulation of anion transport; P:transmembrane transport	0	IPR001925; IPR023614; IPR027246; PTHR11743 (PANTHER), PTHR11743:SF6 (PANTHER)
LCOR_01776.1	-0.957916	0.5148	7.83968	15.2286	FALSE	0.286183	dil and ankyrin domain-containing protein	695	20	1.92216e-148	53.95%	1	F:protein binding	0	IPR002710; IPR018444; IPR020683; PTHR16027 (PANTHER), PTHR16027:SF1 (PANTHER)
LCOR_01777.1	-0.88726	0.54064	6.48722	11.9992	FALSE	0.497316	---NA---	234	0			1	F:protein binding	0	IPR002110; IPR020683; PTHR24122 (PANTHER)
LCOR_01778.1	-1.33022	0.397708	2.51969	6.33552	FALSE	0.0420115	hypothetical protein RO3G_11509	925	4	2.23259e-98	46.75%	1	F:protein binding	0	IPR015915; PTHR23244 (PANTHER), PF13418 (PFAM), SignalP-NN(euk) (SIGNALP), tmhmm (TMHMM), SSF117281 (SUPERFAMILY)
LCOR_01779.1	0.111121	1.08007	4.4183	4.09076	FALSE	0.466732	---NA---	108	0			0	0		no IPS match
LCOR_01780.1	-0.088797	0.940307	93.692	99.6399	FALSE	0.196379	---NA---	95	0			0	0		SignalP-NN(euk) (SIGNALP), tmhmm (TMHMM)
LCOR_01781.1	1.06737	2.09561	0.0668912	0.0319197	FALSE	0.328425	hypothetical protein RO3G_11509	904	4	1.01543e-55	48.0%	1	F:protein binding	0	IPR015915; PTHR23244 (PANTHER), PTHR23244:SF63 (PANTHER), PF13854 (PFAM), SignalP-NN(euk) (SIGNALP), tmhmm (TMHMM), SSF117281 (SUPERFAMILY)
LCOR_01782.1	-0.205921	0.866985	2.07626	2.3948	FALSE	0.493125	hypothetical protein RO3G_11508	919	4	3.87545e-65	43.25%	0	0		IPR015916; PTHR23244 (PANTHER), tmhmm (TMHMM), SSF117281 (SUPERFAMILY)
LCOR_01783.1	-0.934735	0.523138	11.4272	21.8435	FALSE	0.286454	fyve finger containing protein	774	20	0	54.2%	2	F:metal ion binding; F:protein binding	0	IPR000306; IPR002110; IPR011011; IPR013083; IPR017455; IPR020683; PTHR24193 (PANTHER)
LCOR_01784.1	-1.27337	0.413694	1.25611	3.03634	FALSE	0.239464	chitin synthase activator	887	20	6.61616e-83	48.6%	1	F:protein binding	0	IPR006597; IPR011990; PTHR11102 (PANTHER), PTHR11102:SF12 (PANTHER), SSF81901 (SUPERFAMILY)
LCOR_01786.1	-0.709258	0.611635	61.2346	100.116	FALSE	0.720846	ap-3 complex subunit sigma-2	173	20	4.57222e-83	79.8%	4	P:intracellular protein transport; P:vesicle-mediated transport; F:protein transporter activity; C:AP-3 adaptor complex	0	IPR000804; IPR011012; IPR016635; IPR022775; IPR027155; G3DSA:3.30.450.60 (GENE3D)
LCOR_01787.1	-0.850742	0.554499	19.2134	34.65	FALSE	0.427018	cytoplasm protein	1154	20	0	51.45%	1	F:protein binding	0	IPR000008; IPR008528; IPR008973; IPR014770; IPR014772; IPR018029; IPR019558; G3DSA:2.60.40.150 (GENE3D), PTHR16122 (PANTHER), PTHR16122:SF1 (PANTHER)
LCOR_01788.1	-1.0675	0.477144	12.6021	26.4116	FALSE	0.11704	histone-lysine n-methyltransferase ash1l	569	20	3.66553e-90	56.45%	6	F:sequence-specific DNA binding transcription factor activity; F:zinc ion binding; F:sequence-specific DNA binding; F:protein binding; C:nucleus; F:histone-lysine N-methyltransferase activity	EC:2.1.1.43	IPR000679; IPR001214; IPR003616; IPR006560; IPR013088; G3DSA:2.170.270.10 (GENE3D), PTHR22884 (PANTHER), SSF57716 (SUPERFAMILY), SSF82199 (SUPERFAMILY)
LCOR_01789.1	-0.729133	0.603266	49.4512	81.9724	FALSE	0.711263	elongation factor siii p15	104	20	8.57564e-55	73.05%	1	P:ubiquitin-dependent protein catabolic process	0	IPR001232; IPR011333; IPR016073; PTHR20648 (PANTHER), PTHR20648:SF0 (PANTHER)
LCOR_01790.1	1.2762	2.42201	0.153268	0.0632812	FALSE	0.298172	l-lactate transport	557	20	0	74.3%	3	C:integral to plasma membrane; F:lactate transmembrane transporter activity; P:lactate transport	0	IPR003804; PTHR30003 (PANTHER), PTHR30003:SF0 (PANTHER), tmhmm (TMHMM)
LCOR_01791.1	-1.16361	0.446396	6.11921	13.7081	FALSE	0.0879441	transcription factor	599	20	1.09919e-93	76.95%	3	F:protein binding; F:DNA binding; F:sequence-specific DNA binding transcription factor activity	0	IPR002110; IPR003163; IPR018004; IPR020683; PTHR23180 (PANTHER), PTHR23180:SF77 (PANTHER), PF13637 (PFAM)
LCOR_01792.1	-1.15759	0.448262	877.621	1957.83	FALSE	0.09754	---NA---	236	0			0	0		tmhmm (TMHMM)
LCOR_01793.1	-1.22406	0.428076	88.5076	206.757	FALSE	0.0564672	---NA---	259	0			2	F:sequence-specific DNA binding transcription factor activity; F:sequence-specific DNA binding	0	IPR004827; G3DSA:1.20.5.170 (GENE3D), PTHR13044 (PANTHER), PTHR13044:SF7 (PANTHER)
LCOR_01794.1	0.532416	1.44635	36.1211	24.974	TRUE	0.000742242	---NA---	514	0			0	0		no IPS match
LCOR_01795.1	-0.288935	0.818506	1705.37	2083.52	FALSE	0.478039	40s ribosomal protein s27	122	20	2.13967e-51	90.8%	3	F:structural constituent of ribosome; C:ribosome; P:translation	0	IPR000592; IPR011332; IPR023407; PTHR11594:SF0 (PANTHER)
LCOR_01796.1	-2.64726	0.159623	9.55122	59.836	TRUE	1.22921e-11	nicotianamine synthase	304	20	1.93851e-64	50.55%	2	F:nicotianamine synthase activity; P:nicotianamine biosynthetic process	EC:2.5.1.43	IPR004298; G3DSA:3.40.50.150 (GENE3D), PTHR32266 (PANTHER), SSF53335 (SUPERFAMILY)
LCOR_01797.1	-0.436461	0.738945	26.1023	35.3238	FALSE	0.778632	protein kinase	546	20	1.14765e-119	66.6%	4	F:ATP binding; P:protein phosphorylation; F:protein serine/threonine kinase activity; F:protein tyrosine kinase activity	EC:2.7.11.0; EC:2.7.10.0	IPR000719; IPR000961; IPR002290; IPR008271; IPR011009; IPR017441; IPR020635; G3DSA:1.10.510.10 (GENE3D), G3DSA:3.30.200.20 (GENE3D), PTHR24356 (PANTHER), PTHR24356:SF0 (PANTHER), SignalP-NN(euk) (SIGNALP)
LCOR_01798.1	-0.985238	0.505142	14.2527	28.2152	FALSE	0.323552	protein	262	20	3.7022e-50	57.7%	2	C:mitochondrial inner membrane; P:mitochondrial proton-transporting ATP synthase complex assembly	0	IPR007849; IPR012336
LCOR_01799.1	-1.05489	0.481334	15.0698	31.3083	FALSE	0.133015	hypothetical protein BATDEDRAFT_87032	931	1	7.6604e-46	52.0%	0	0		IPR009053; IPR022091; IPR022092; PTHR31724 (PANTHER), PTHR31724:SF0 (PANTHER)
LCOR_01800.1	-0.999464	0.500186	106.183	212.288	FALSE	0.198297	serine threonine-protein phosphatase pp1	329	20	0	92.95%	1	F:hydrolase activity	0	IPR004843; IPR006186; G3DSA:3.60.21.10 (GENE3D), PTHR11668 (PANTHER), PTHR11668:SF74 (PANTHER), SSF56300 (SUPERFAMILY)
LCOR_01801.1	-1.33878	0.395356	30.8539	78.0408	FALSE	0.0691215	hypothetical protein RO3G_09292	83	1	1.08777e-41	90.0%	0	0		IPR007918; PTHR21329 (PANTHER)
LCOR_01802.1	0.764953	1.69931	1.40982	0.829638	FALSE	0.0686546	hypothetical protein RO3G_11602	360	4	4.24421e-33	76.5%	2	F:zinc ion binding; F:nucleic acid binding	0	IPR007087; IPR013087; IPR015880; PTHR11389 (PANTHER), PF13465 (PFAM), SSF57667 (SUPERFAMILY)
LCOR_01803.1	-0.756115	0.592089	11.0178	18.6084	FALSE	0.793362	glutaredoxin	100	20	3.73488e-31	72.15%	3	F:electron carrier activity; F:protein disulfide oxidoreductase activity; P:cell redox homeostasis	0	IPR002109; IPR011767; IPR011899; IPR012336; IPR014025; PTHR10168 (PANTHER)
LCOR_01804.1	-0.937009	0.522315	6.44145	12.3325	FALSE	0.316188	hypothetical protein RO3G_03385	654	1	1.50922e-35	61.0%	0	0		IPR014840; IPR026947
LCOR_01805.1	4.42525	21.4849	11.2839	0.525202	TRUE	3.56853e-21	---NA---	380	0			0	0		no IPS match
LCOR_01806.1	-1.39774	0.379524	16.4324	43.2974	TRUE	0.00739921	dynamin-a	725	20	0	69.85%	2	F:GTP binding; F:GTPase activity	0	IPR000375; IPR001401; IPR003130; IPR019762; IPR020850; IPR022812; IPR027417; G3DSA:3.40.50.300 (GENE3D), PTHR11566:SF12 (PANTHER)
LCOR_01808.1	-1.50919	0.351308	7.59664	21.6239	TRUE	0.0091126	wd40 repeat-containing protein	333	20	1.06461e-45	50.45%	1	F:protein binding	0	IPR001680; IPR015943; IPR017986; IPR019775; IPR020472; PTHR22847 (PANTHER)
LCOR_01809.1	-1.11096	0.462985	11.8552	25.606	FALSE	0.0884718	hypothetical protein RO3G_08432	1184	20	0	48.8%	0	0		IPR022233; PTHR13251 (PANTHER), PTHR13251:SF3 (PANTHER)
LCOR_01810.1	2.04815	4.13577	21.621	5.22781	TRUE	1.34334e-11	hypothetical protein RO3G_02803	207	1	9.96257e-27	57.0%	0	0		IPR009571; SignalP-NN(euk) (SIGNALP), tmhmm (TMHMM)
LCOR_01811.1	0.85136	1.8042	11.6089	6.4344	TRUE	0.000119624	n-acetylglucosamine-6-phosphate deacetylase-like	432	20	0	64.55%	2	P:N-acetylglucosamine metabolic process; F:N-acetylglucosamine-6-phosphate deacetylase activity	EC:3.5.1.25	IPR003764; IPR006680; IPR011059; G3DSA:2.30.40.10 (GENE3D), G3DSA:3.20.20.140 (GENE3D), PTHR11113 (PANTHER), PF13594 (PFAM), SSF51556 (SUPERFAMILY)
LCOR_01812.1	1.19091	2.28297	5453.98	2388.98	TRUE	2.44718e-07	hypothetical protein RO3G_03737	312	1	4.32276e-61	63.0%	2	P:lipid metabolic process; F:hydrolase activity	0	IPR001087; IPR013831; tmhmm (TMHMM), SSF52266 (SUPERFAMILY)
LCOR_01813.1	-0.413649	0.750722	17.6283	23.4818	FALSE	0.741948	---NA---	809	0			0	0		IPR003123; IPR013995; PTHR23101 (PANTHER), SSF109993 (SUPERFAMILY)
LCOR_01815.1	-0.894522	0.537925	2.28592	4.24951	FALSE	0.596186	---NA---	439	0			2	F:protein binding; F:zinc ion binding	0	IPR001841; IPR013083; G3DSA:3.50.30.30 (GENE3D), PTHR22765 (PANTHER), SignalP-NN(euk) (SIGNALP), tmhmm (TMHMM), SSF57850 (SUPERFAMILY)
LCOR_01816.1	-1.40824	0.376772	5.36528	14.2401	FALSE	0.0194807	retinol dehydrogenase 14-like	557	16	2.46437e-32	48.31%	2	P:metabolic process; F:oxidoreductase activity	0	IPR002198; IPR002347; IPR003807; IPR016040; PTHR24320 (PANTHER), tmhmm (TMHMM), SSF51735 (SUPERFAMILY)
LCOR_01817.1	-1.52962	0.346369	0.801126	2.31293	FALSE	0.296001	---NA---	156	0			0	0		SignalP-NN(euk) (SIGNALP)
LCOR_01818.1	-0.420746	0.747038	5.20956	6.97362	FALSE	0.802041	related to neurofibromin	2695	20	0	55.65%	4	F:GTPase activator activity; C:intracellular; P:regulation of small GTPase mediated signal transduction; F:binding	0	IPR001251; IPR001936; IPR008936; IPR016024; IPR023152; IPR025481; PTHR10194 (PANTHER), PTHR10194:SF7 (PANTHER), PF13716 (PFAM)
LCOR_01819.1	-0.0983959	0.934071	3.9314	4.20889	FALSE	0.269147	rna-binding domain-containing protein	756	20	0	58.95%	2	F:nucleic acid binding; F:nucleotide binding	0	IPR000504; IPR012677; PTHR24012 (PANTHER), PTHR24012:SF87 (PANTHER), SSF54928 (SUPERFAMILY)
LCOR_01820.1	-0.908912	0.532587	29.7428	55.8459	FALSE	0.406395	mitochondrial 54s ribosomal protein mrpl51	138	20	1.02812e-49	71.2%	1	C:ribosome		IPR007741; IPR012336; PTHR21396 (PANTHER)
LCOR_01821.1	-1.09388	0.468501	16.6686	35.5785	FALSE	0.17667	transport protein particle complex subunit	136	20	1.59203e-55	76.7%	2	C:cis-Golgi network; P:ER to Golgi vesicle-mediated transport	0	IPR007233; IPR011012; G3DSA:3.30.450.70 (GENE3D), PTHR23249:SF2 (PANTHER)
LCOR_01822.1	-1.10902	0.463609	0.175495	0.378541	FALSE	0.665128	glucoamylase	448	20	7.68156e-147	61.1%	2	P:polysaccharide metabolic process; F:catalytic activity	0	IPR000165; IPR008928; IPR011613; IPR012341; PTHR31616 (PANTHER), PTHR31616:SF0 (PANTHER), SignalP-NN(euk) (SIGNALP)
LCOR_01823.1	-0.70224	0.614617	4.72856	7.6935	FALSE	0.743664	hypothetical protein RO3G_12344	1563	20	0	52.2%	0	0		IPR006068; IPR023214; IPR023298; IPR023299; PTHR13219 (PANTHER), PTHR13219:SF6 (PANTHER), SignalP-NN(euk) (SIGNALP), tmhmm (TMHMM), SSF81665 (SUPERFAMILY)
LCOR_01824.1	1.37267	2.58949	0.477412	0.184366	FALSE	0.1504	---NA---	212	0			0	0		SignalP-NN(euk) (SIGNALP)
LCOR_01825.1	-0.296936	0.813979	1106.79	1359.73	FALSE	0.498581	40s ribosomal protein s15	147	20	3.78667e-68	91.95%	4	F:structural constituent of ribosome; P:translation; C:small ribosomal subunit; F:RNA binding	0	IPR002222; IPR005713; IPR020934; IPR023575
LCOR_01826.1	0.978348	1.97021	85.5517	43.4227	TRUE	2.79107e-06	inositol hexakisphosphate kinase 3-like	332	20	5.7825e-55	60.25%	14	F:inositol-1,4,5-trisphosphate 3-kinase activity; F:kinase activity; P:phosphorylation; F:transferase activity; F:inositol hexakisphosphate 5-kinase activity; F:inositol heptakisphosphate kinase activity; F:inositol hexakisphosphate kinase activity; F:inositol-1,3,4,5,6-pentakisphosphate kinase activity; F:identical protein binding; F:nucleotide binding; C:cytoplasm; F:ATP binding; P:inositol pho…		IPR005522; PTHR12400:SF21 (PANTHER), SSF56104 (SUPERFAMILY)
LCOR_01827.1	-0.487506	0.713257	56.7335	79.5414	FALSE	0.864817	histone-fold-containing protein	143	20	9.11262e-53	83.9%	5	C:intracellular; F:sequence-specific DNA binding; F:protein heterodimerization activity; F:transcription cofactor activity; P:regulation of transcription from RNA polymerase II promoter	0	IPR003958; IPR009072; IPR027113; PTHR11064 (PANTHER)
[truncated: 9,327 more rows]

## Sheet: SID_VERSUS_CO
id	log2FC	absfold	SID_mean_rpkm	control_mean_rpkm	EdgeR	p_edgeR	Seq..Description	Seq..Length	X.Hits	min..eValue	mean.Similarity	X.GOs	GOs	Enzyme.Codes	InterProScan
[truncated: 11,018 more rows]

[truncated: 1 more sheets: Tandems]
